# Supplementary material for: Scatter Irradiation of Rat Brain Triggers Sex- and Brain Region-Specific Changes in the Expression of Non-Coding RNA Fragments
Source: Epigenomes. 2022 Oct 12;6(4):35. doi: 10.3390/epigenomes6040035 (PMC9624364; doi:10.3390/epigenomes6040035)
Supplement: Supplementary file 1 [file epigenomes-06-00035-s001.zip]

Archive with 5 entries (5 files):
- epigenomes-1922357-Supplementary figures.pdf
- Supplementary File 1.xlsx
- Supplementary File 2_miRDB targets.xlsx
- Supplementary File 3_David targets.xlsx
- Supplementary File 4_David targets_significant.xlsx
