# Supplementary material for: Scatter Irradiation of Rat Brain Triggers Sex- and Brain Region-Specific Changes in the Expression of Non-Coding RNA Fragments
Source: Epigenomes. 2022 Oct 12;6(4):35. doi: 10.3390/epigenomes6040035 (PMC9624364; doi:10.3390/epigenomes6040035)
Supplement: Supplementary file 1 [file epigenomes-06-00035-s001.zip › Supplementary File 1.xlsx]

## Sheet: tRF
	CER_Ct_M							CER_SR_M					FC_Ct_M						FC_SR_M						HIP_Ct_M						HIP_SR_M						CER_SR_F						FC_Ct_F						FC_SR_F
SeqID	Target Rank	Target Score	Gene Symbol	Gene Description		SeqID	Target Rank	Target Score	Gene Symbol	Gene Description		SeqID	Target Rank	Target Score	Gene Symbol	Gene Description		SeqID	Target Rank	Target Score	Gene Symbol	Gene Description		SeqID	Target Rank	Target Score	Gene Symbol	Gene Description		SeqID	Target Rank	Target Score	Gene Symbol	Gene Description		SeqID	Target Rank	Target Score	Gene Symbol	Gene Description		SeqID	Target Rank	Target Score	Gene Symbol	Gene Description		SeqID	Target Rank
GACTCTTAGCGGTGGATCACTCGGC	1	100	Zbtb44	zinc finger and BTB domain containing 44		GGAATACCGGGTGCTGTAGGCT	1	98	Ythdf3	YTH domain family, member 3		GACTCTTAGCGGTGGATCACTCGGC	1	100	Zbtb44	zinc finger and BTB domain containing 44		GACTCTTAGCGGTGGATCACTCGGCT	1	100	Zbtb44	zinc finger and BTB domain containing 44		GACTCTTAGCGGTGGATCACTCGGC	1	100	Zbtb44	zinc finger and BTB domain containing 44		GACTCTTAGCGGTGGATCACTCGGC	1	100	Zbtb44	zinc finger and BTB domain containing 44		GACTCTTAGCGGTGGATCACTCGGC	1	100	Zbtb44	zinc finger and BTB domain containing 44		GACTCTTAGCGGTGGATCACTCGGC	1	100	Zbtb44	zinc finger and BTB domain containing 44		GACTCTTAGCGGTGGATCACTCGGC	1
	2	99	Appbp2	amyloid beta precursor protein (cytoplasmic tail) binding protein 2			2	96	Sumo3	small ubiquitin-like modifier 3			2	99	Appbp2	amyloid beta precursor protein (cytoplasmic tail) binding protein 2			2	99	Appbp2	amyloid beta precursor protein (cytoplasmic tail) binding protein 2			2	99	Appbp2	amyloid beta precursor protein (cytoplasmic tail) binding protein 2			2	99	Appbp2	amyloid beta precursor protein (cytoplasmic tail) binding protein 2			2	99	Appbp2	amyloid beta precursor protein (cytoplasmic tail) binding protein 2			2	99	Appbp2	amyloid beta precursor protein (cytoplasmic tail) binding protein 2			2
	3	99	Ripply3	ripply transcriptional repressor 3			3	95	Tmed7	transmembrane emp24 protein transport domain containing 7			3	99	Ripply3	ripply transcriptional repressor 3			3	99	Ripply3	ripply transcriptional repressor 3			3	99	Ripply3	ripply transcriptional repressor 3			3	99	Ripply3	ripply transcriptional repressor 3			3	99	Ripply3	ripply transcriptional repressor 3			3	99	Ripply3	ripply transcriptional repressor 3			3
	4	98	Pex12	peroxisomal biogenesis factor 12			4	94	Nr3c1	nuclear receptor subfamily 3, group C, member 1			4	98	Pex12	peroxisomal biogenesis factor 12			4	98	Pex12	peroxisomal biogenesis factor 12			4	98	Pex12	peroxisomal biogenesis factor 12			4	98	Pex12	peroxisomal biogenesis factor 12			4	98	Pex12	peroxisomal biogenesis factor 12			4	98	Pex12	peroxisomal biogenesis factor 12			4
	5	97	Tet1	tet methylcytosine dioxygenase 1			5	94	Spred1	sprouty-related, EVH1 domain containing 1			5	97	Tet1	tet methylcytosine dioxygenase 1			5	97	Tet1	tet methylcytosine dioxygenase 1			5	97	Tet1	tet methylcytosine dioxygenase 1			5	97	Tet1	tet methylcytosine dioxygenase 1			5	97	Tet1	tet methylcytosine dioxygenase 1			5	97	Tet1	tet methylcytosine dioxygenase 1			5
	6	97	Cpeb4	cytoplasmic polyadenylation element binding protein 4			6	91	Mprip	myosin phosphatase Rho interacting protein			6	97	Cpeb4	cytoplasmic polyadenylation element binding protein 4			6	97	Cpeb4	cytoplasmic polyadenylation element binding protein 4			6	97	Cpeb4	cytoplasmic polyadenylation element binding protein 4			6	97	Cpeb4	cytoplasmic polyadenylation element binding protein 4			6	97	Cpeb4	cytoplasmic polyadenylation element binding protein 4			6	97	Cpeb4	cytoplasmic polyadenylation element binding protein 4			6
	7	97	Fgf7	fibroblast growth factor 7			7	91	Cd47	Cd47 molecule			7	97	Fgf7	fibroblast growth factor 7			7	97	Fgf7	fibroblast growth factor 7			7	97	Fgf7	fibroblast growth factor 7			7	97	Fgf7	fibroblast growth factor 7			7	97	Fgf7	fibroblast growth factor 7			7	97	Fgf7	fibroblast growth factor 7			7
	8	96	Rhobtb3	Rho-related BTB domain containing 3			8	90	Zfp317	zinc finger protein 317			8	96	Rhobtb3	Rho-related BTB domain containing 3			8	96	Rhobtb3	Rho-related BTB domain containing 3			8	96	Rhobtb3	Rho-related BTB domain containing 3			8	96	Rhobtb3	Rho-related BTB domain containing 3			8	96	Rhobtb3	Rho-related BTB domain containing 3			8	96	Rhobtb3	Rho-related BTB domain containing 3			8
	9	95	Rag1	recombination activating gene 1			9	90	Fndc3b	fibronectin type III domain containing 3B			9	95	Rag1	recombination activating gene 1			9	95	Rag1	recombination activating gene 1			9	95	Rag1	recombination activating gene 1			9	95	Rag1	recombination activating gene 1			9	95	Rag1	recombination activating gene 1			9	95	Rag1	recombination activating gene 1			9
	10	95	Arhgap5	Rho GTPase activating protein 5			10	86	Hecw1	HECT, C2 and WW domain containing E3 ubiquitin protein ligase 1			10	95	Arhgap5	Rho GTPase activating protein 5			10	95	Arhgap5	Rho GTPase activating protein 5			10	95	Arhgap5	Rho GTPase activating protein 5			10	95	Arhgap5	Rho GTPase activating protein 5			10	95	Arhgap5	Rho GTPase activating protein 5			10	95	Arhgap5	Rho GTPase activating protein 5			10
	11	94	Mtss1	metastasis suppressor 1			11	86	Astn1	astrotactin 1			11	94	Mtss1	metastasis suppressor 1			11	94	Mtss1	metastasis suppressor 1			11	94	Mtss1	metastasis suppressor 1			11	94	Mtss1	metastasis suppressor 1			11	94	Mtss1	metastasis suppressor 1			11	94	Mtss1	metastasis suppressor 1			11
	12	94	Nr2c1	nuclear receptor subfamily 2, group C, member 1			12	84	Ywhaq	tyrosine 3-monooxygenase/tryptophan 5-monooxygenase activation protein, theta			12	94	Nr2c1	nuclear receptor subfamily 2, group C, member 1			12	94	Nr2c1	nuclear receptor subfamily 2, group C, member 1			12	94	Nr2c1	nuclear receptor subfamily 2, group C, member 1			12	94	Nr2c1	nuclear receptor subfamily 2, group C, member 1			12	94	Nr2c1	nuclear receptor subfamily 2, group C, member 1			12	94	Nr2c1	nuclear receptor subfamily 2, group C, member 1			12
	13	93	Nog	noggin			13	84	Phf6	PHD finger protein 6			13	93	Nog	noggin			13	93	Nog	noggin			13	93	Nog	noggin			13	93	Nog	noggin			13	93	Nog	noggin			13	93	Nog	noggin			13
	14	93	Med14	mediator complex subunit 14			14	84	Tchh	trichohyalin			14	93	Med14	mediator complex subunit 14			14	93	Med14	mediator complex subunit 14			14	93	Med14	mediator complex subunit 14			14	93	Med14	mediator complex subunit 14			14	93	Med14	mediator complex subunit 14			14	93	Med14	mediator complex subunit 14			14
	15	93	Gria2	glutamate receptor, ionotropic, AMPA 2			15	82	Snx7	sorting nexin 7			15	93	Gria2	glutamate receptor, ionotropic, AMPA 2			15	93	Gria2	glutamate receptor, ionotropic, AMPA 2			15	93	Gria2	glutamate receptor, ionotropic, AMPA 2			15	93	Gria2	glutamate receptor, ionotropic, AMPA 2			15	93	Gria2	glutamate receptor, ionotropic, AMPA 2			15	93	Gria2	glutamate receptor, ionotropic, AMPA 2			15
	16	93	LOC100909787	peroxisome assembly protein 12-like			16	82	Arhgap5	Rho GTPase activating protein 5			16	93	LOC100909787	peroxisome assembly protein 12-like			16	93	LOC100909787	peroxisome assembly protein 12-like			16	93	LOC100909787	peroxisome assembly protein 12-like			16	93	LOC100909787	peroxisome assembly protein 12-like			16	93	LOC100909787	peroxisome assembly protein 12-like			16	93	LOC100909787	peroxisome assembly protein 12-like			16
	17	93	Clock	clock circadian regulator			17	82	Tra2b	transformer 2 beta homolog (Drosophila)			17	93	Clock	clock circadian regulator			17	93	Clock	clock circadian regulator			17	93	Clock	clock circadian regulator			17	93	Clock	clock circadian regulator			17	93	Clock	clock circadian regulator			17	93	Clock	clock circadian regulator			17
	18	92	Camta1	calmodulin binding transcription activator 1			18	81	Med13	mediator complex subunit 13			18	92	Camta1	calmodulin binding transcription activator 1			18	92	Camta1	calmodulin binding transcription activator 1			18	92	Camta1	calmodulin binding transcription activator 1			18	92	Camta1	calmodulin binding transcription activator 1			18	92	Camta1	calmodulin binding transcription activator 1			18	92	Camta1	calmodulin binding transcription activator 1			18
	19	92	Mex3c	mex-3 RNA binding family member C			19	80	Paxbp1	PAX3 and PAX7 binding protein 1			19	92	Mex3c	mex-3 RNA binding family member C			19	92	Mex3c	mex-3 RNA binding family member C			19	92	Mex3c	mex-3 RNA binding family member C			19	92	Mex3c	mex-3 RNA binding family member C			19	92	Mex3c	mex-3 RNA binding family member C			19	92	Mex3c	mex-3 RNA binding family member C			19
	20	92	Zfpm2	zinc finger protein, multitype 2			20	80	LOC100910838	neuronal tyrosine-phosphorylated phosphoinositide-3-kinase adapter 1-like			20	92	Zfpm2	zinc finger protein, multitype 2			20	92	Zfpm2	zinc finger protein, multitype 2			20	92	Zfpm2	zinc finger protein, multitype 2			20	92	Zfpm2	zinc finger protein, multitype 2			20	92	Zfpm2	zinc finger protein, multitype 2			20	92	Zfpm2	zinc finger protein, multitype 2			20
	21	91	Mapre1	microtubule-associated protein, RP/EB family, member 1		ACCGGGTGCTGTAGGCT	1	95	Srgap3	SLIT-ROBO Rho GTPase activating protein 3			21	91	Mapre1	microtubule-associated protein, RP/EB family, member 1			21	91	Mapre1	microtubule-associated protein, RP/EB family, member 1			21	91	Mapre1	microtubule-associated protein, RP/EB family, member 1			21	91	Mapre1	microtubule-associated protein, RP/EB family, member 1			21	91	Mapre1	microtubule-associated protein, RP/EB family, member 1			21	91	Mapre1	microtubule-associated protein, RP/EB family, member 1			21
	22	91	Arrdc3	arrestin domain containing 3			2	94	Prdm12	PR domain containing 12			22	91	Arrdc3	arrestin domain containing 3			22	91	Arrdc3	arrestin domain containing 3			22	91	Arrdc3	arrestin domain containing 3			22	91	Arrdc3	arrestin domain containing 3			22	91	Arrdc3	arrestin domain containing 3			22	91	Arrdc3	arrestin domain containing 3			22
	23	90	Fgd6	FYVE, RhoGEF and PH domain containing 6			3	94	Srsf2	serine/arginine-rich splicing factor 2			23	90	Fgd6	FYVE, RhoGEF and PH domain containing 6			23	90	Fgd6	FYVE, RhoGEF and PH domain containing 6			23	90	Fgd6	FYVE, RhoGEF and PH domain containing 6			23	90	Fgd6	FYVE, RhoGEF and PH domain containing 6			23	90	Fgd6	FYVE, RhoGEF and PH domain containing 6			23	90	Fgd6	FYVE, RhoGEF and PH domain containing 6			23
	24	90	Zfp637	zinc finger protein 637			4	94	Otof	otoferlin			24	90	Zfp637	zinc finger protein 637			24	90	Zfp637	zinc finger protein 637			24	90	Zfp637	zinc finger protein 637			24	90	Zfp637	zinc finger protein 637			24	90	Zfp637	zinc finger protein 637			24	90	Zfp637	zinc finger protein 637			24
	25	89	Slc35b3	solute carrier family 35 (adenosine 3'-phospho 5'-phosphosulfate transporter), member B3			5	94	Wwc2	WW and C2 domain containing 2			25	89	Slc35b3	solute carrier family 35 (adenosine 3'-phospho 5'-phosphosulfate transporter), member B3			25	89	Slc35b3	solute carrier family 35 (adenosine 3'-phospho 5'-phosphosulfate transporter), member B3			25	89	Slc35b3	solute carrier family 35 (adenosine 3'-phospho 5'-phosphosulfate transporter), member B3			25	89	Slc35b3	solute carrier family 35 (adenosine 3'-phospho 5'-phosphosulfate transporter), member B3			25	89	Slc35b3	solute carrier family 35 (adenosine 3'-phospho 5'-phosphosulfate transporter), member B3			25	89	Slc35b3	solute carrier family 35 (adenosine 3'-phospho 5'-phosphosulfate transporter), member B3			25
	26	89	Btbd10	BTB (POZ) domain containing 10			6	92	Ppard	peroxisome proliferator-activated receptor delta			26	89	Btbd10	BTB (POZ) domain containing 10			26	89	Btbd10	BTB (POZ) domain containing 10			26	89	Btbd10	BTB (POZ) domain containing 10			26	89	Btbd10	BTB (POZ) domain containing 10			26	89	Btbd10	BTB (POZ) domain containing 10			26	89	Btbd10	BTB (POZ) domain containing 10			26
	27	89	Zfp804a	zinc finger protein 804A			7	92	Kcnq4	potassium voltage-gated channel, KQT-like subfamily, member 4			27	89	Zfp804a	zinc finger protein 804A			27	89	Zfp804a	zinc finger protein 804A			27	89	Zfp804a	zinc finger protein 804A			27	89	Zfp804a	zinc finger protein 804A			27	89	Zfp804a	zinc finger protein 804A			27	89	Zfp804a	zinc finger protein 804A			27
	28	89	Ddhd2	DDHD domain containing 2			8	90	LOC100911378	hyaluronan and proteoglycan link protein 4-like			28	89	Ddhd2	DDHD domain containing 2			28	89	Ddhd2	DDHD domain containing 2			28	89	Ddhd2	DDHD domain containing 2			28	89	Ddhd2	DDHD domain containing 2			28	89	Ddhd2	DDHD domain containing 2			28	89	Ddhd2	DDHD domain containing 2			28
	29	88	Slc26a7	solute carrier family 26 (anion exchanger), member 7			9	90	Tnfrsf26	tumor necrosis factor receptor superfamily, member 26			29	88	Slc26a7	solute carrier family 26 (anion exchanger), member 7			29	88	Slc26a7	solute carrier family 26 (anion exchanger), member 7			29	88	Slc26a7	solute carrier family 26 (anion exchanger), member 7			29	88	Slc26a7	solute carrier family 26 (anion exchanger), member 7			29	88	Slc26a7	solute carrier family 26 (anion exchanger), member 7			29	88	Slc26a7	solute carrier family 26 (anion exchanger), member 7			29
	30	88	Apc	adenomatous polyposis coli			10	90	Fam19a3	family with sequence similarity 19 (chemokine (C-C motif)-like), member A3			30	88	Apc	adenomatous polyposis coli			30	88	Apc	adenomatous polyposis coli			30	88	Apc	adenomatous polyposis coli			30	88	Apc	adenomatous polyposis coli			30	88	Apc	adenomatous polyposis coli			30	88	Apc	adenomatous polyposis coli			30
	31	88	Bend4	BEN domain containing 4			11	90	Hapln4	hyaluronan and proteoglycan link protein 4			31	88	Bend4	BEN domain containing 4			31	88	Bend4	BEN domain containing 4			31	88	Bend4	BEN domain containing 4			31	88	Bend4	BEN domain containing 4			31	88	Bend4	BEN domain containing 4			31	88	Bend4	BEN domain containing 4			31
	32	88	Atp6v1b2	ATPase, H transporting, lysosomal V1 subunit B2			12	89	Ank2	ankyrin 2, neuronal			32	88	Atp6v1b2	ATPase, H transporting, lysosomal V1 subunit B2			32	88	Atp6v1b2	ATPase, H transporting, lysosomal V1 subunit B2			32	88	Atp6v1b2	ATPase, H transporting, lysosomal V1 subunit B2			32	88	Atp6v1b2	ATPase, H transporting, lysosomal V1 subunit B2			32	88	Atp6v1b2	ATPase, H transporting, lysosomal V1 subunit B2			32	88	Atp6v1b2	ATPase, H transporting, lysosomal V1 subunit B2			32
	33	87	Nova1	neuro-oncological ventral antigen 1			13	88	Cyp4f18	cytochrome P450, family 4, subfamily f, polypeptide 18			33	87	Nova1	neuro-oncological ventral antigen 1			33	87	Nova1	neuro-oncological ventral antigen 1			33	87	Nova1	neuro-oncological ventral antigen 1			33	87	Nova1	neuro-oncological ventral antigen 1			33	87	Nova1	neuro-oncological ventral antigen 1			33	87	Nova1	neuro-oncological ventral antigen 1			33
	34	87	Adam12	ADAM metallopeptidase domain 12			14	88	Btrc	beta-transducin repeat containing E3 ubiquitin protein ligase			34	87	Adam12	ADAM metallopeptidase domain 12			34	87	Adam12	ADAM metallopeptidase domain 12			34	87	Adam12	ADAM metallopeptidase domain 12			34	87	Adam12	ADAM metallopeptidase domain 12			34	87	Adam12	ADAM metallopeptidase domain 12			34	87	Adam12	ADAM metallopeptidase domain 12			34
	35	86	Ptpn4	protein tyrosine phosphatase, non-receptor type 4			15	88	Nhej1	nonhomologous end-joining factor 1			35	86	Ptpn4	protein tyrosine phosphatase, non-receptor type 4			35	86	Ptpn4	protein tyrosine phosphatase, non-receptor type 4			35	86	Ptpn4	protein tyrosine phosphatase, non-receptor type 4			35	86	Ptpn4	protein tyrosine phosphatase, non-receptor type 4			35	86	Ptpn4	protein tyrosine phosphatase, non-receptor type 4			35	86	Ptpn4	protein tyrosine phosphatase, non-receptor type 4			35
	36	86	Cwc25	CWC25 spliceosome-associated protein homolog (S. cerevisiae)			16	87	LOC102549836	uncharacterized LOC102549836			36	86	Cwc25	CWC25 spliceosome-associated protein homolog (S. cerevisiae)			36	86	Cwc25	CWC25 spliceosome-associated protein homolog (S. cerevisiae)			36	86	Cwc25	CWC25 spliceosome-associated protein homolog (S. cerevisiae)			36	86	Cwc25	CWC25 spliceosome-associated protein homolog (S. cerevisiae)			36	86	Cwc25	CWC25 spliceosome-associated protein homolog (S. cerevisiae)			36	86	Cwc25	CWC25 spliceosome-associated protein homolog (S. cerevisiae)			36
	37	86	Vamp7	vesicle-associated membrane protein 7			17	87	Plekhd1	pleckstrin homology domain containing, family D (with coiled-coil domains) member 1			37	86	Vamp7	vesicle-associated membrane protein 7			37	86	Vamp7	vesicle-associated membrane protein 7			37	86	Vamp7	vesicle-associated membrane protein 7			37	86	Vamp7	vesicle-associated membrane protein 7			37	86	Vamp7	vesicle-associated membrane protein 7			37	86	Vamp7	vesicle-associated membrane protein 7			37
	38	85	Adra1d	adrenoceptor alpha 1D			18	83	RGD1309049	similar to RIKEN cDNA 4933415F23			38	85	Adra1d	adrenoceptor alpha 1D			38	85	Adra1d	adrenoceptor alpha 1D			38	85	Adra1d	adrenoceptor alpha 1D			38	85	Adra1d	adrenoceptor alpha 1D			38	85	Adra1d	adrenoceptor alpha 1D			38	85	Adra1d	adrenoceptor alpha 1D			38
	39	85	LOC683071	similar to La-related protein 4 (La ribonucleoprotein domain family member 4)			19	83	LOC102549615	exostosin-like 3-like			39	85	LOC683071	similar to La-related protein 4 (La ribonucleoprotein domain family member 4)			39	85	LOC683071	similar to La-related protein 4 (La ribonucleoprotein domain family member 4)			39	85	LOC683071	similar to La-related protein 4 (La ribonucleoprotein domain family member 4)			39	85	LOC683071	similar to La-related protein 4 (La ribonucleoprotein domain family member 4)			39	85	LOC683071	similar to La-related protein 4 (La ribonucleoprotein domain family member 4)			39	85	LOC683071	similar to La-related protein 4 (La ribonucleoprotein domain family member 4)			39
	40	85	Rassf8	Ras association (RalGDS/AF-6) domain family (N-terminal) member 8			20	83	Extl3	exostosin-like glycosyltransferase 3			40	85	Rassf8	Ras association (RalGDS/AF-6) domain family (N-terminal) member 8			40	85	Rassf8	Ras association (RalGDS/AF-6) domain family (N-terminal) member 8			40	85	Rassf8	Ras association (RalGDS/AF-6) domain family (N-terminal) member 8			40	85	Rassf8	Ras association (RalGDS/AF-6) domain family (N-terminal) member 8			40	85	Rassf8	Ras association (RalGDS/AF-6) domain family (N-terminal) member 8			40	85	Rassf8	Ras association (RalGDS/AF-6) domain family (N-terminal) member 8			40
	41	84	Mid2	midline 2			21	82	Pou3f1	POU class 3 homeobox 1			41	84	Mid2	midline 2			41	84	Mid2	midline 2			41	84	Mid2	midline 2			41	84	Mid2	midline 2			41	84	Mid2	midline 2			41	84	Mid2	midline 2			41
	42	84	Usp47	ubiquitin specific peptidase 47			22	82	Fam160b2	family with sequence similarity 160, member B2			42	84	Usp47	ubiquitin specific peptidase 47			42	84	Usp47	ubiquitin specific peptidase 47			42	84	Usp47	ubiquitin specific peptidase 47			42	84	Usp47	ubiquitin specific peptidase 47			42	84	Usp47	ubiquitin specific peptidase 47			42	84	Usp47	ubiquitin specific peptidase 47			42
	43	84	Herc4	HECT and RLD domain containing E3 ubiquitin protein ligase 4			23	81	Tbc1d2	TBC1 domain family, member 2			43	84	Herc4	HECT and RLD domain containing E3 ubiquitin protein ligase 4			43	84	Herc4	HECT and RLD domain containing E3 ubiquitin protein ligase 4			43	84	Herc4	HECT and RLD domain containing E3 ubiquitin protein ligase 4			43	84	Herc4	HECT and RLD domain containing E3 ubiquitin protein ligase 4			43	84	Herc4	HECT and RLD domain containing E3 ubiquitin protein ligase 4			43	84	Herc4	HECT and RLD domain containing E3 ubiquitin protein ligase 4			43
	44	84	Ubn2	ubinuclein 2			24	81	Hspa12a	heat shock protein 12A			44	84	Ubn2	ubinuclein 2			44	84	Ubn2	ubinuclein 2			44	84	Ubn2	ubinuclein 2			44	84	Ubn2	ubinuclein 2			44	84	Ubn2	ubinuclein 2			44	84	Ubn2	ubinuclein 2			44
	45	83	Selt	selenoprotein T			25	80	LOC100909834	lysine-specific demethylase 4D-like			45	83	Selt	selenoprotein T			45	83	Selt	selenoprotein T			45	83	Selt	selenoprotein T			45	83	Selt	selenoprotein T			45	83	Selt	selenoprotein T			45	83	Selt	selenoprotein T			45
	46	83	Pnn	pinin, desmosome associated protein			26	80	Kdm4d	lysine (K)-specific demethylase 4D			46	83	Pnn	pinin, desmosome associated protein			46	83	Pnn	pinin, desmosome associated protein			46	83	Pnn	pinin, desmosome associated protein			46	83	Pnn	pinin, desmosome associated protein			46	83	Pnn	pinin, desmosome associated protein			46	83	Pnn	pinin, desmosome associated protein			46
	47	83	Slc16a12	solute carrier family 16, member 12			27	80	Adamts6	ADAM metallopeptidase with thrombospondin type 1 motif, 6			47	83	Slc16a12	solute carrier family 16, member 12			47	83	Slc16a12	solute carrier family 16, member 12			47	83	Slc16a12	solute carrier family 16, member 12			47	83	Slc16a12	solute carrier family 16, member 12			47	83	Slc16a12	solute carrier family 16, member 12			47	83	Slc16a12	solute carrier family 16, member 12			47
	48	83	Armc1	armadillo repeat containing 1			28	80	Capn11	calpain 11			48	83	Armc1	armadillo repeat containing 1			48	83	Armc1	armadillo repeat containing 1			48	83	Armc1	armadillo repeat containing 1			48	83	Armc1	armadillo repeat containing 1			48	83	Armc1	armadillo repeat containing 1			48	83	Armc1	armadillo repeat containing 1			48
	49	83	Ccdc6	coiled-coil domain containing 6									49	83	Ccdc6	coiled-coil domain containing 6			49	83	Ccdc6	coiled-coil domain containing 6			49	83	Ccdc6	coiled-coil domain containing 6			49	83	Ccdc6	coiled-coil domain containing 6			49	83	Ccdc6	coiled-coil domain containing 6			49	83	Ccdc6	coiled-coil domain containing 6			49
	50	83	Spry4	sprouty homolog 4 (Drosophila)									50	83	Spry4	sprouty homolog 4 (Drosophila)			50	83	Spry4	sprouty homolog 4 (Drosophila)			50	83	Spry4	sprouty homolog 4 (Drosophila)			50	83	Spry4	sprouty homolog 4 (Drosophila)			50	83	Spry4	sprouty homolog 4 (Drosophila)			50	83	Spry4	sprouty homolog 4 (Drosophila)			50
	51	83	Ccdc126	coiled-coil domain containing 126									51	83	Ccdc126	coiled-coil domain containing 126			51	83	Ccdc126	coiled-coil domain containing 126			51	83	Ccdc126	coiled-coil domain containing 126			51	83	Ccdc126	coiled-coil domain containing 126			51	83	Ccdc126	coiled-coil domain containing 126			51	83	Ccdc126	coiled-coil domain containing 126			51
	52	82	Brwd3	bromodomain and WD repeat domain containing 3									52	82	Brwd3	bromodomain and WD repeat domain containing 3			52	82	Brwd3	bromodomain and WD repeat domain containing 3			52	82	Brwd3	bromodomain and WD repeat domain containing 3			52	82	Brwd3	bromodomain and WD repeat domain containing 3			52	82	Brwd3	bromodomain and WD repeat domain containing 3			52	82	Brwd3	bromodomain and WD repeat domain containing 3			52
	53	82	Snx10	sorting nexin 10									53	82	Snx10	sorting nexin 10			53	82	Snx10	sorting nexin 10			53	82	Snx10	sorting nexin 10			53	82	Snx10	sorting nexin 10			53	82	Snx10	sorting nexin 10			53	82	Snx10	sorting nexin 10			53
	54	82	Rai1	retinoic acid induced 1									54	82	Rai1	retinoic acid induced 1			54	82	Rai1	retinoic acid induced 1			54	82	Rai1	retinoic acid induced 1			54	82	Rai1	retinoic acid induced 1			54	82	Rai1	retinoic acid induced 1			54	82	Rai1	retinoic acid induced 1			54
	55	82	Tmx3	thioredoxin-related transmembrane protein 3									55	82	Tmx3	thioredoxin-related transmembrane protein 3			55	82	Tmx3	thioredoxin-related transmembrane protein 3			55	82	Tmx3	thioredoxin-related transmembrane protein 3			55	82	Tmx3	thioredoxin-related transmembrane protein 3			55	82	Tmx3	thioredoxin-related transmembrane protein 3			55	82	Tmx3	thioredoxin-related transmembrane protein 3			55
	56	82	Usp34	ubiquitin specific peptidase 34									56	82	Usp34	ubiquitin specific peptidase 34			56	82	Usp34	ubiquitin specific peptidase 34			56	82	Usp34	ubiquitin specific peptidase 34			56	82	Usp34	ubiquitin specific peptidase 34			56	82	Usp34	ubiquitin specific peptidase 34			56	82	Usp34	ubiquitin specific peptidase 34			56
	57	82	Tmem169	transmembrane protein 169									57	82	Tmem169	transmembrane protein 169			57	82	Tmem169	transmembrane protein 169			57	82	Tmem169	transmembrane protein 169			57	82	Tmem169	transmembrane protein 169			57	82	Tmem169	transmembrane protein 169			57	82	Tmem169	transmembrane protein 169			57
	58	81	Atp6v1a	ATPase, H+ transporting, lysosomal V1 subunit A									58	81	Atp6v1a	ATPase, H+ transporting, lysosomal V1 subunit A			58	81	Atp6v1a	ATPase, H+ transporting, lysosomal V1 subunit A			58	81	Atp6v1a	ATPase, H+ transporting, lysosomal V1 subunit A			58	81	Atp6v1a	ATPase, H+ transporting, lysosomal V1 subunit A			58	81	Atp6v1a	ATPase, H+ transporting, lysosomal V1 subunit A			58	81	Atp6v1a	ATPase, H+ transporting, lysosomal V1 subunit A			58
	59	81	Slc44a1	solute carrier family 44 (choline transporter), member 1									59	81	Slc44a1	solute carrier family 44 (choline transporter), member 1			59	81	Slc44a1	solute carrier family 44 (choline transporter), member 1			59	81	Slc44a1	solute carrier family 44 (choline transporter), member 1			59	81	Slc44a1	solute carrier family 44 (choline transporter), member 1			59	81	Slc44a1	solute carrier family 44 (choline transporter), member 1			59	81	Slc44a1	solute carrier family 44 (choline transporter), member 1			59
	60	81	Gosr1	golgi SNAP receptor complex member 1									60	81	Gosr1	golgi SNAP receptor complex member 1			60	81	Gosr1	golgi SNAP receptor complex member 1			60	81	Gosr1	golgi SNAP receptor complex member 1			60	81	Gosr1	golgi SNAP receptor complex member 1			60	81	Gosr1	golgi SNAP receptor complex member 1			60	81	Gosr1	golgi SNAP receptor complex member 1			60
	61	81	Hdgfl1	hepatoma derived growth factor-like 1									61	81	Hdgfl1	hepatoma derived growth factor-like 1			61	81	Hdgfl1	hepatoma derived growth factor-like 1			61	81	Hdgfl1	hepatoma derived growth factor-like 1			61	81	Hdgfl1	hepatoma derived growth factor-like 1			61	81	Hdgfl1	hepatoma derived growth factor-like 1			61	81	Hdgfl1	hepatoma derived growth factor-like 1			61
	62	81	St3gal6	ST3 beta-galactoside alpha-2,3-sialyltransferase 6									62	81	St3gal6	ST3 beta-galactoside alpha-2,3-sialyltransferase 6			62	81	St3gal6	ST3 beta-galactoside alpha-2,3-sialyltransferase 6			62	81	St3gal6	ST3 beta-galactoside alpha-2,3-sialyltransferase 6			62	81	St3gal6	ST3 beta-galactoside alpha-2,3-sialyltransferase 6			62	81	St3gal6	ST3 beta-galactoside alpha-2,3-sialyltransferase 6			62	81	St3gal6	ST3 beta-galactoside alpha-2,3-sialyltransferase 6			62
	63	81	Golga5	golgin A5									63	81	Golga5	golgin A5			63	81	Golga5	golgin A5			63	81	Golga5	golgin A5			63	81	Golga5	golgin A5			63	81	Golga5	golgin A5			63	81	Golga5	golgin A5			63
	64	80	Lrig1	leucine-rich repeats and immunoglobulin-like domains 1									64	80	Lrig1	leucine-rich repeats and immunoglobulin-like domains 1			64	80	Lrig1	leucine-rich repeats and immunoglobulin-like domains 1			64	80	Lrig1	leucine-rich repeats and immunoglobulin-like domains 1			64	80	Lrig1	leucine-rich repeats and immunoglobulin-like domains 1			64	80	Lrig1	leucine-rich repeats and immunoglobulin-like domains 1			64	80	Lrig1	leucine-rich repeats and immunoglobulin-like domains 1			64
	65	80	Dmc1	DNA meiotic recombinase 1									65	80	Dmc1	DNA meiotic recombinase 1			65	80	Dmc1	DNA meiotic recombinase 1			65	80	Dmc1	DNA meiotic recombinase 1			65	80	Dmc1	DNA meiotic recombinase 1			65	80	Dmc1	DNA meiotic recombinase 1			65	80	Dmc1	DNA meiotic recombinase 1			65
	66	80	Ckap5	cytoskeleton associated protein 5									66	80	Ckap5	cytoskeleton associated protein 5			66	80	Ckap5	cytoskeleton associated protein 5			66	80	Ckap5	cytoskeleton associated protein 5			66	80	Ckap5	cytoskeleton associated protein 5			66	80	Ckap5	cytoskeleton associated protein 5			66	80	Ckap5	cytoskeleton associated protein 5			66
												GACTCTTAGCGGTGGATCACTCGGCTC	1	100	Zbtb44	zinc finger and BTB domain containing 44		GACTCTTAGCGGTGGATCACTCGGCTC	1	100	Zbtb44	zinc finger and BTB domain containing 44		ACCGGGTGCTGTAGGCT	1	95	Srgap3	SLIT-ROBO Rho GTPase activating protein 3								GACTCTTAGCGGTGGATCACTCGGCT	1	100	Zbtb44	zinc finger and BTB domain containing 44
													2	99	Appbp2	amyloid beta precursor protein (cytoplasmic tail) binding protein 2			2	99	Appbp2	amyloid beta precursor protein (cytoplasmic tail) binding protein 2			2	94	Prdm12	PR domain containing 12									2	99	Appbp2	amyloid beta precursor protein (cytoplasmic tail) binding protein 2
													3	99	Ripply3	ripply transcriptional repressor 3			3	99	Ripply3	ripply transcriptional repressor 3			3	94	Srsf2	serine/arginine-rich splicing factor 2									3	99	Ripply3	ripply transcriptional repressor 3
													4	98	Pex12	peroxisomal biogenesis factor 12			4	98	Pex12	peroxisomal biogenesis factor 12			4	94	Otof	otoferlin									4	98	Pex12	peroxisomal biogenesis factor 12
													5	97	Tet1	tet methylcytosine dioxygenase 1			5	97	Tet1	tet methylcytosine dioxygenase 1			5	94	Wwc2	WW and C2 domain containing 2									5	97	Tet1	tet methylcytosine dioxygenase 1
													6	97	Cpeb4	cytoplasmic polyadenylation element binding protein 4			6	97	Cpeb4	cytoplasmic polyadenylation element binding protein 4			6	92	Ppard	peroxisome proliferator-activated receptor delta									6	97	Cpeb4	cytoplasmic polyadenylation element binding protein 4
													7	97	Fgf7	fibroblast growth factor 7			7	97	Fgf7	fibroblast growth factor 7			7	92	Kcnq4	potassium voltage-gated channel, KQT-like subfamily, member 4									7	97	Fgf7	fibroblast growth factor 7
													8	96	Rhobtb3	Rho-related BTB domain containing 3			8	96	Rhobtb3	Rho-related BTB domain containing 3			8	90	LOC100911378	hyaluronan and proteoglycan link protein 4-like									8	96	Rhobtb3	Rho-related BTB domain containing 3
													9	95	Rag1	recombination activating gene 1			9	95	Rag1	recombination activating gene 1			9	90	Tnfrsf26	tumor necrosis factor receptor superfamily, member 26									9	95	Rag1	recombination activating gene 1
													10	95	Arhgap5	Rho GTPase activating protein 5			10	95	Arhgap5	Rho GTPase activating protein 5			10	90	Fam19a3	family with sequence similarity 19 (chemokine (C-C motif)-like), member A3									10	95	Arhgap5	Rho GTPase activating protein 5
													11	94	Mtss1	metastasis suppressor 1			11	94	Mtss1	metastasis suppressor 1			11	90	Hapln4	hyaluronan and proteoglycan link protein 4									11	94	Mtss1	metastasis suppressor 1
													12	94	Nr2c1	nuclear receptor subfamily 2, group C, member 1			12	94	Nr2c1	nuclear receptor subfamily 2, group C, member 1			12	89	Ank2	ankyrin 2, neuronal									12	94	Nr2c1	nuclear receptor subfamily 2, group C, member 1
													13	93	Nog	noggin			13	93	Nog	noggin			13	88	Cyp4f18	cytochrome P450, family 4, subfamily f, polypeptide 18									13	93	Nog	noggin
													14	93	Med14	mediator complex subunit 14			14	93	Med14	mediator complex subunit 14			14	88	Btrc	beta-transducin repeat containing E3 ubiquitin protein ligase									14	93	Med14	mediator complex subunit 14
													15	93	Gria2	glutamate receptor, ionotropic, AMPA 2			15	93	Gria2	glutamate receptor, ionotropic, AMPA 2			15	88	Nhej1	nonhomologous end-joining factor 1									15	93	Gria2	glutamate receptor, ionotropic, AMPA 2
													16	93	LOC100909787	peroxisome assembly protein 12-like			16	93	LOC100909787	peroxisome assembly protein 12-like			16	87	LOC102549836	uncharacterized LOC102549836									16	93	LOC100909787	peroxisome assembly protein 12-like
													17	93	Clock	clock circadian regulator			17	93	Clock	clock circadian regulator			17	87	Plekhd1	pleckstrin homology domain containing, family D (with coiled-coil domains) member 1									17	93	Clock	clock circadian regulator
													18	92	Camta1	calmodulin binding transcription activator 1			18	92	Camta1	calmodulin binding transcription activator 1			18	83	RGD1309049	similar to RIKEN cDNA 4933415F23									18	92	Camta1	calmodulin binding transcription activator 1
													19	92	Mex3c	mex-3 RNA binding family member C			19	92	Mex3c	mex-3 RNA binding family member C			19	83	LOC102549615	exostosin-like 3-like									19	92	Mex3c	mex-3 RNA binding family member C
													20	92	Zfpm2	zinc finger protein, multitype 2			20	92	Zfpm2	zinc finger protein, multitype 2			20	83	Extl3	exostosin-like glycosyltransferase 3									20	92	Zfpm2	zinc finger protein, multitype 2
													21	91	Mapre1	microtubule-associated protein, RP/EB family, member 1			21	91	Mapre1	microtubule-associated protein, RP/EB family, member 1			21	82	Pou3f1	POU class 3 homeobox 1									21	91	Mapre1	microtubule-associated protein, RP/EB family, member 1
													22	91	Arrdc3	arrestin domain containing 3			22	91	Arrdc3	arrestin domain containing 3			22	82	Fam160b2	family with sequence similarity 160, member B2									22	91	Arrdc3	arrestin domain containing 3
													23	90	Fgd6	FYVE, RhoGEF and PH domain containing 6			23	90	Fgd6	FYVE, RhoGEF and PH domain containing 6			23	81	Tbc1d2	TBC1 domain family, member 2									23	90	Fgd6	FYVE, RhoGEF and PH domain containing 6
													24	90	Zfp637	zinc finger protein 637			24	90	Zfp637	zinc finger protein 637			24	81	Hspa12a	heat shock protein 12A									24	90	Zfp637	zinc finger protein 637
													25	89	Slc35b3	solute carrier family 35 (adenosine 3'-phospho 5'-phosphosulfate transporter), member B3			25	89	Slc35b3	solute carrier family 35 (adenosine 3'-phospho 5'-phosphosulfate transporter), member B3			25	80	LOC100909834	lysine-specific demethylase 4D-like									25	89	Slc35b3	solute carrier family 35 (adenosine 3'-phospho 5'-phosphosulfate transporter), member B3
													26	89	Btbd10	BTB (POZ) domain containing 10			26	89	Btbd10	BTB (POZ) domain containing 10			26	80	Kdm4d	lysine (K)-specific demethylase 4D									26	89	Btbd10	BTB (POZ) domain containing 10
													27	89	Zfp804a	zinc finger protein 804A			27	89	Zfp804a	zinc finger protein 804A			27	80	Adamts6	ADAM metallopeptidase with thrombospondin type 1 motif, 6									27	89	Zfp804a	zinc finger protein 804A
													28	89	Ddhd2	DDHD domain containing 2			28	89	Ddhd2	DDHD domain containing 2			28	80	Capn11	calpain 11									28	89	Ddhd2	DDHD domain containing 2
													29	88	Slc26a7	solute carrier family 26 (anion exchanger), member 7			29	88	Slc26a7	solute carrier family 26 (anion exchanger), member 7															29	88	Slc26a7	solute carrier family 26 (anion exchanger), member 7
													30	88	Apc	adenomatous polyposis coli			30	88	Apc	adenomatous polyposis coli															30	88	Apc	adenomatous polyposis coli
													31	88	Bend4	BEN domain containing 4			31	88	Bend4	BEN domain containing 4															31	88	Bend4	BEN domain containing 4
													32	88	Atp6v1b2	ATPase, H transporting, lysosomal V1 subunit B2			32	88	Atp6v1b2	ATPase, H transporting, lysosomal V1 subunit B2															32	88	Atp6v1b2	ATPase, H transporting, lysosomal V1 subunit B2
													33	87	Nova1	neuro-oncological ventral antigen 1			33	87	Nova1	neuro-oncological ventral antigen 1															33	87	Nova1	neuro-oncological ventral antigen 1
													34	87	Adam12	ADAM metallopeptidase domain 12			34	87	Adam12	ADAM metallopeptidase domain 12															34	87	Adam12	ADAM metallopeptidase domain 12
													35	86	Ptpn4	protein tyrosine phosphatase, non-receptor type 4			35	86	Ptpn4	protein tyrosine phosphatase, non-receptor type 4															35	86	Ptpn4	protein tyrosine phosphatase, non-receptor type 4
													36	86	Cwc25	CWC25 spliceosome-associated protein homolog (S. cerevisiae)			36	86	Cwc25	CWC25 spliceosome-associated protein homolog (S. cerevisiae)															36	86	Cwc25	CWC25 spliceosome-associated protein homolog (S. cerevisiae)
													37	86	Vamp7	vesicle-associated membrane protein 7			37	86	Vamp7	vesicle-associated membrane protein 7															37	86	Vamp7	vesicle-associated membrane protein 7
													38	85	Adra1d	adrenoceptor alpha 1D			38	85	Adra1d	adrenoceptor alpha 1D															38	85	Adra1d	adrenoceptor alpha 1D
													39	85	LOC683071	similar to La-related protein 4 (La ribonucleoprotein domain family member 4)			39	85	LOC683071	similar to La-related protein 4 (La ribonucleoprotein domain family member 4)															39	85	LOC683071	similar to La-related protein 4 (La ribonucleoprotein domain family member 4)
													40	85	Rassf8	Ras association (RalGDS/AF-6) domain family (N-terminal) member 8			40	85	Rassf8	Ras association (RalGDS/AF-6) domain family (N-terminal) member 8															40	85	Rassf8	Ras association (RalGDS/AF-6) domain family (N-terminal) member 8
													41	84	Mid2	midline 2			41	84	Mid2	midline 2															41	84	Mid2	midline 2
													42	84	Usp47	ubiquitin specific peptidase 47			42	84	Usp47	ubiquitin specific peptidase 47															42	84	Usp47	ubiquitin specific peptidase 47
													43	84	Herc4	HECT and RLD domain containing E3 ubiquitin protein ligase 4			43	84	Herc4	HECT and RLD domain containing E3 ubiquitin protein ligase 4															43	84	Herc4	HECT and RLD domain containing E3 ubiquitin protein ligase 4
													44	84	Ubn2	ubinuclein 2			44	84	Ubn2	ubinuclein 2															44	84	Ubn2	ubinuclein 2
													45	83	Selt	selenoprotein T			45	83	Selt	selenoprotein T															45	83	Selt	selenoprotein T
													46	83	Pnn	pinin, desmosome associated protein			46	83	Pnn	pinin, desmosome associated protein															46	83	Pnn	pinin, desmosome associated protein
													47	83	Slc16a12	solute carrier family 16, member 12			47	83	Slc16a12	solute carrier family 16, member 12															47	83	Slc16a12	solute carrier family 16, member 12
													48	83	Armc1	armadillo repeat containing 1			48	83	Armc1	armadillo repeat containing 1															48	83	Armc1	armadillo repeat containing 1
													49	83	Ccdc6	coiled-coil domain containing 6			49	83	Ccdc6	coiled-coil domain containing 6															49	83	Ccdc6	coiled-coil domain containing 6
													50	83	Spry4	sprouty homolog 4 (Drosophila)			50	83	Spry4	sprouty homolog 4 (Drosophila)															50	83	Spry4	sprouty homolog 4 (Drosophila)
													51	83	Ccdc126	coiled-coil domain containing 126			51	83	Ccdc126	coiled-coil domain containing 126															51	83	Ccdc126	coiled-coil domain containing 126
													52	82	Brwd3	bromodomain and WD repeat domain containing 3			52	82	Brwd3	bromodomain and WD repeat domain containing 3															52	82	Brwd3	bromodomain and WD repeat domain containing 3
													53	82	Snx10	sorting nexin 10			53	82	Snx10	sorting nexin 10															53	82	Snx10	sorting nexin 10
													54	82	Rai1	retinoic acid induced 1			54	82	Rai1	retinoic acid induced 1															54	82	Rai1	retinoic acid induced 1
													55	82	Tmx3	thioredoxin-related transmembrane protein 3			55	82	Tmx3	thioredoxin-related transmembrane protein 3															55	82	Tmx3	thioredoxin-related transmembrane protein 3
													56	82	Usp34	ubiquitin specific peptidase 34			56	82	Usp34	ubiquitin specific peptidase 34															56	82	Usp34	ubiquitin specific peptidase 34
													57	82	Tmem169	transmembrane protein 169			57	82	Tmem169	transmembrane protein 169															57	82	Tmem169	transmembrane protein 169
													58	81	Atp6v1a	ATPase, H+ transporting, lysosomal V1 subunit A			58	81	Atp6v1a	ATPase, H+ transporting, lysosomal V1 subunit A															58	81	Atp6v1a	ATPase, H+ transporting, lysosomal V1 subunit A
													59	81	Slc44a1	solute carrier family 44 (choline transporter), member 1			59	81	Slc44a1	solute carrier family 44 (choline transporter), member 1															59	81	Slc44a1	solute carrier family 44 (choline transporter), member 1
													60	81	Gosr1	golgi SNAP receptor complex member 1			60	81	Gosr1	golgi SNAP receptor complex member 1															60	81	Gosr1	golgi SNAP receptor complex member 1
													61	81	Hdgfl1	hepatoma derived growth factor-like 1			61	81	Hdgfl1	hepatoma derived growth factor-like 1															61	81	Hdgfl1	hepatoma derived growth factor-like 1
													62	81	St3gal6	ST3 beta-galactoside alpha-2,3-sialyltransferase 6			62	81	St3gal6	ST3 beta-galactoside alpha-2,3-sialyltransferase 6															62	81	St3gal6	ST3 beta-galactoside alpha-2,3-sialyltransferase 6
													63	81	Golga5	golgin A5			63	81	Golga5	golgin A5															63	81	Golga5	golgin A5
													64	80	Lrig1	leucine-rich repeats and immunoglobulin-like domains 1			64	80	Lrig1	leucine-rich repeats and immunoglobulin-like domains 1															64	80	Lrig1	leucine-rich repeats and immunoglobulin-like domains 1
													65	80	Dmc1	DNA meiotic recombinase 1			65	80	Dmc1	DNA meiotic recombinase 1															65	80	Dmc1	DNA meiotic recombinase 1
													66	80	Ckap5	cytoskeleton associated protein 5			66	80	Ckap5	cytoskeleton associated protein 5															66	80	Ckap5	cytoskeleton associated protein 5
																		GAATACCGGGTGCTGTAGGCT	1	96	Gspt1	G1 to S phase transition 1														ACCGGGTGCTGTAGGCT	1	95	Srgap3	SLIT-ROBO Rho GTPase activating protein 3
																			2	94	Adamts6	ADAM metallopeptidase with thrombospondin type 1 motif, 6															2	94	Prdm12	PR domain containing 12
																		ACCGGGTGCTGTAGGCT	1	95	Srgap3	SLIT-ROBO Rho GTPase activating protein 3															3	94	Srsf2	serine/arginine-rich splicing factor 2
																			2	94	Prdm12	PR domain containing 12															4	94	Otof	otoferlin
																			3	94	Srsf2	serine/arginine-rich splicing factor 2															5	94	Wwc2	WW and C2 domain containing 2
																			4	94	Otof	otoferlin															6	92	Ppard	peroxisome proliferator-activated receptor delta
																			5	94	Wwc2	WW and C2 domain containing 2															7	92	Kcnq4	potassium voltage-gated channel, KQT-like subfamily, member 4
																			6	92	Ppard	peroxisome proliferator-activated receptor delta															8	90	LOC100911378	hyaluronan and proteoglycan link protein 4-like
																			7	92	Kcnq4	potassium voltage-gated channel, KQT-like subfamily, member 4															9	90	Tnfrsf26	tumor necrosis factor receptor superfamily, member 26
																			8	90	LOC100911378	hyaluronan and proteoglycan link protein 4-like															10	90	Fam19a3	family with sequence similarity 19 (chemokine (C-C motif)-like), member A3
																			9	90	Tnfrsf26	tumor necrosis factor receptor superfamily, member 26															11	90	Hapln4	hyaluronan and proteoglycan link protein 4
																			10	90	Fam19a3	family with sequence similarity 19 (chemokine (C-C motif)-like), member A3															12	89	Ank2	ankyrin 2, neuronal
																			11	90	Hapln4	hyaluronan and proteoglycan link protein 4															13	88	Cyp4f18	cytochrome P450, family 4, subfamily f, polypeptide 18
																			12	89	Ank2	ankyrin 2, neuronal															14	88	Btrc	beta-transducin repeat containing E3 ubiquitin protein ligase
																			13	88	Cyp4f18	cytochrome P450, family 4, subfamily f, polypeptide 18															15	88	Nhej1	nonhomologous end-joining factor 1
																			14	88	Btrc	beta-transducin repeat containing E3 ubiquitin protein ligase															16	87	LOC102549836	uncharacterized LOC102549836
																			15	88	Nhej1	nonhomologous end-joining factor 1															17	87	Plekhd1	pleckstrin homology domain containing, family D (with coiled-coil domains) member 1
																			16	87	LOC102549836	uncharacterized LOC102549836															18	83	RGD1309049	similar to RIKEN cDNA 4933415F23
																			17	87	Plekhd1	pleckstrin homology domain containing, family D (with coiled-coil domains) member 1															19	83	LOC102549615	exostosin-like 3-like
																			18	83	RGD1309049	similar to RIKEN cDNA 4933415F23															20	83	Extl3	exostosin-like glycosyltransferase 3
																			19	83	LOC102549615	exostosin-like 3-like															21	82	Pou3f1	POU class 3 homeobox 1
																			20	83	Extl3	exostosin-like glycosyltransferase 3															22	82	Fam160b2	family with sequence similarity 160, member B2
																			21	82	Pou3f1	POU class 3 homeobox 1															23	81	Tbc1d2	TBC1 domain family, member 2
																			22	82	Fam160b2	family with sequence similarity 160, member B2															24	81	Hspa12a	heat shock protein 12A
																			23	81	Tbc1d2	TBC1 domain family, member 2															25	80	LOC100909834	lysine-specific demethylase 4D-like
																			24	81	Hspa12a	heat shock protein 12A															26	80	Kdm4d	lysine (K)-specific demethylase 4D
																			25	80	LOC100909834	lysine-specific demethylase 4D-like															27	80	Adamts6	ADAM metallopeptidase with thrombospondin type 1 motif, 6
																			26	80	Kdm4d	lysine (K)-specific demethylase 4D															28	80	Capn11	calpain 11
																			27	80	Adamts6	ADAM metallopeptidase with thrombospondin type 1 motif, 6														GGAATACCGGGTGCTGTAGGCT	1	98	Ythdf3	YTH domain family, member 3
																			28	80	Capn11	calpain 11															2	96	Sumo3	small ubiquitin-like modifier 3
																																					3	95	Tmed7	transmembrane emp24 protein transport domain containing 7
																																					4	94	Nr3c1	nuclear receptor subfamily 3, group C, member 1
																																					5	94	Spred1	sprouty-related, EVH1 domain containing 1
																																					6	91	Mprip	myosin phosphatase Rho interacting protein
																																					7	91	Cd47	Cd47 molecule
																																					8	90	Zfp317	zinc finger protein 317
																																					9	90	Fndc3b	fibronectin type III domain containing 3B
																																					10	86	Hecw1	HECT, C2 and WW domain containing E3 ubiquitin protein ligase 1
																																					11	86	Astn1	astrotactin 1
																																					12	84	Ywhaq	tyrosine 3-monooxygenase/tryptophan 5-monooxygenase activation protein, theta
																																					13	84	Phf6	PHD finger protein 6
																																					14	84	Tchh	trichohyalin
																																					15	82	Snx7	sorting nexin 7
																																					16	82	Arhgap5	Rho GTPase activating protein 5
																																					17	82	Tra2b	transformer 2 beta homolog (Drosophila)
																																					18	81	Med13	mediator complex subunit 13
																																					19	80	Paxbp1	PAX3 and PAX7 binding protein 1
																																					20	80	LOC100910838	neuronal tyrosine-phosphorylated phosphoinositide-3-kinase adapter 1-like
[truncated: 13 more columns]

## Sheet: snoRF
CER_Ct_M					CER_SR_M					FC_Ct_M					FC_SR_M					HIP_Ct_M					HIP_SR_M					CER_Ct_F					CER_SR_F					FC_Ct_F					Fc_SR_F
Target Rank	Target Score	Gene Symbol	Gene Description		Target Rank	Target Score	Gene Symbol	Gene Description		Target Rank	Target Score	Gene Symbol	Gene Description		Target Rank	Target Score	Gene Symbol	Gene Description		Target Rank	Target Score	Gene Symbol	Gene Description		Target Rank	Target Score	Gene Symbol	Gene Description		Target Rank	Target Score	Gene Symbol	Gene Description		Target Rank	Target Score	Gene Symbol	Gene Description		Target Rank	Target Score	Gene Symbol	Gene Description		Target Rank	Target Score	Gene Symbol	Gene Description
1	99	Chic1	cysteine-rich hydrophobic domain 1		1	99	Chic1	cysteine-rich hydrophobic domain 1		1	99	Chic1	cysteine-rich hydrophobic domain 1		1	99	Chic1	cysteine-rich hydrophobic domain 1		1	99	Chic1	cysteine-rich hydrophobic domain 1		1	99	Chic1	cysteine-rich hydrophobic domain 1		1	99	Chic1	cysteine-rich hydrophobic domain 1		1	99	Chic1	cysteine-rich hydrophobic domain 1		1	99	Chic1	cysteine-rich hydrophobic domain 1		1	99	Chic1	cysteine-rich hydrophobic domain 1
2	98	Fam117b	family with sequence similarity 117, member B		2	98	Fam117b	family with sequence similarity 117, member B		2	98	Fam117b	family with sequence similarity 117, member B		2	98	Fam117b	family with sequence similarity 117, member B		2	98	Fam117b	family with sequence similarity 117, member B		2	98	Fam117b	family with sequence similarity 117, member B		2	98	Fam117b	family with sequence similarity 117, member B		2	98	Fam117b	family with sequence similarity 117, member B		2	98	Fam117b	family with sequence similarity 117, member B		2	98	Fam117b	family with sequence similarity 117, member B
3	98	Dagla	diacylglycerol lipase, alpha		3	98	Dagla	diacylglycerol lipase, alpha		3	98	Dagla	diacylglycerol lipase, alpha		3	98	Dagla	diacylglycerol lipase, alpha		3	98	Dagla	diacylglycerol lipase, alpha		3	98	Dagla	diacylglycerol lipase, alpha		3	98	Dagla	diacylglycerol lipase, alpha		3	98	Dagla	diacylglycerol lipase, alpha		3	98	Dagla	diacylglycerol lipase, alpha		3	98	Dagla	diacylglycerol lipase, alpha
4	97	Zfp462	zinc finger protein 462		4	97	Zfp462	zinc finger protein 462		4	97	Zfp462	zinc finger protein 462		4	97	Zfp462	zinc finger protein 462		4	97	Zfp462	zinc finger protein 462		4	97	Zfp462	zinc finger protein 462		4	97	Zfp462	zinc finger protein 462		4	97	Zfp462	zinc finger protein 462		4	97	Zfp462	zinc finger protein 462		4	97	Zfp462	zinc finger protein 462
5	96	Zkscan1	zinc finger with KRAB and SCAN domains 1		5	96	Zkscan1	zinc finger with KRAB and SCAN domains 1		5	96	Zkscan1	zinc finger with KRAB and SCAN domains 1		5	96	Zkscan1	zinc finger with KRAB and SCAN domains 1		5	96	Zkscan1	zinc finger with KRAB and SCAN domains 1		5	96	Zkscan1	zinc finger with KRAB and SCAN domains 1		5	96	Zkscan1	zinc finger with KRAB and SCAN domains 1		5	96	Zkscan1	zinc finger with KRAB and SCAN domains 1		5	96	Zkscan1	zinc finger with KRAB and SCAN domains 1		5	96	Zkscan1	zinc finger with KRAB and SCAN domains 1
6	96	Sf1	splicing factor 1		6	96	Sf1	splicing factor 1		6	96	Sf1	splicing factor 1		6	96	Sf1	splicing factor 1		6	96	Sf1	splicing factor 1		6	96	Sf1	splicing factor 1		6	96	Sf1	splicing factor 1		6	96	Sf1	splicing factor 1		6	96	Sf1	splicing factor 1		6	96	Sf1	splicing factor 1
7	96	Elavl4	ELAV like neuron-specific RNA binding protein 4		7	96	Elavl4	ELAV like neuron-specific RNA binding protein 4		7	96	Elavl4	ELAV like neuron-specific RNA binding protein 4		7	96	Elavl4	ELAV like neuron-specific RNA binding protein 4		7	96	Elavl4	ELAV like neuron-specific RNA binding protein 4		7	96	Elavl4	ELAV like neuron-specific RNA binding protein 4		7	96	Elavl4	ELAV like neuron-specific RNA binding protein 4		7	96	Elavl4	ELAV like neuron-specific RNA binding protein 4		7	96	Elavl4	ELAV like neuron-specific RNA binding protein 4		7	96	Elavl4	ELAV like neuron-specific RNA binding protein 4
8	95	Dazap1	DAZ associated protein 1		8	95	Dazap1	DAZ associated protein 1		8	95	Dazap1	DAZ associated protein 1		8	95	Dazap1	DAZ associated protein 1		8	95	Dazap1	DAZ associated protein 1		8	95	Dazap1	DAZ associated protein 1		8	95	Dazap1	DAZ associated protein 1		8	95	Dazap1	DAZ associated protein 1		8	95	Dazap1	DAZ associated protein 1		8	95	Dazap1	DAZ associated protein 1
9	95	Kat7	K (lysine) acetyltransferase 7		9	95	Kat7	K (lysine) acetyltransferase 7		9	95	Kat7	K (lysine) acetyltransferase 7		9	95	Kat7	K (lysine) acetyltransferase 7		9	95	Kat7	K (lysine) acetyltransferase 7		9	95	Kat7	K (lysine) acetyltransferase 7		9	95	Kat7	K (lysine) acetyltransferase 7		9	95	Kat7	K (lysine) acetyltransferase 7		9	95	Kat7	K (lysine) acetyltransferase 7		9	95	Kat7	K (lysine) acetyltransferase 7
10	94	Akirin2	akirin 2		10	94	Akirin2	akirin 2		10	94	Akirin2	akirin 2		10	94	Akirin2	akirin 2		10	94	Akirin2	akirin 2		10	94	Akirin2	akirin 2		10	94	Akirin2	akirin 2		10	94	Akirin2	akirin 2		10	94	Akirin2	akirin 2		10	94	Akirin2	akirin 2
11	94	Pitpnm2	phosphatidylinositol transfer protein, membrane-associated 2		11	94	Pitpnm2	phosphatidylinositol transfer protein, membrane-associated 2		11	94	Pitpnm2	phosphatidylinositol transfer protein, membrane-associated 2		11	94	Pitpnm2	phosphatidylinositol transfer protein, membrane-associated 2		11	94	Pitpnm2	phosphatidylinositol transfer protein, membrane-associated 2		11	94	Pitpnm2	phosphatidylinositol transfer protein, membrane-associated 2		11	94	Pitpnm2	phosphatidylinositol transfer protein, membrane-associated 2		11	94	Pitpnm2	phosphatidylinositol transfer protein, membrane-associated 2		11	94	Pitpnm2	phosphatidylinositol transfer protein, membrane-associated 2		11	94	Pitpnm2	phosphatidylinositol transfer protein, membrane-associated 2
12	94	Stk32a	serine/threonine kinase 32A		12	94	Stk32a	serine/threonine kinase 32A		12	94	Stk32a	serine/threonine kinase 32A		12	94	Stk32a	serine/threonine kinase 32A		12	94	Stk32a	serine/threonine kinase 32A		12	94	Stk32a	serine/threonine kinase 32A		12	94	Stk32a	serine/threonine kinase 32A		12	94	Stk32a	serine/threonine kinase 32A		12	94	Stk32a	serine/threonine kinase 32A		12	94	Stk32a	serine/threonine kinase 32A
13	93	Atp1b3	ATPase, Na+/K+ transporting, beta 3 polypeptide		13	93	Atp1b3	ATPase, Na+/K+ transporting, beta 3 polypeptide		13	93	Atp1b3	ATPase, Na+/K+ transporting, beta 3 polypeptide		13	93	Atp1b3	ATPase, Na+/K+ transporting, beta 3 polypeptide		13	93	Atp1b3	ATPase, Na+/K+ transporting, beta 3 polypeptide		13	93	Atp1b3	ATPase, Na+/K+ transporting, beta 3 polypeptide		13	93	Atp1b3	ATPase, Na+/K+ transporting, beta 3 polypeptide		13	93	Atp1b3	ATPase, Na+/K+ transporting, beta 3 polypeptide		13	93	Atp1b3	ATPase, Na+/K+ transporting, beta 3 polypeptide		13	93	Atp1b3	ATPase, Na+/K+ transporting, beta 3 polypeptide
14	93	Zfp445	zinc finger protein 445		14	93	Zfp445	zinc finger protein 445		14	93	Zfp445	zinc finger protein 445		14	93	Zfp445	zinc finger protein 445		14	93	Zfp445	zinc finger protein 445		14	93	Zfp445	zinc finger protein 445		14	93	Zfp445	zinc finger protein 445		14	93	Zfp445	zinc finger protein 445		14	93	Zfp445	zinc finger protein 445		14	93	Zfp445	zinc finger protein 445
15	92	Rnf38	ring finger protein 38		15	92	Rnf38	ring finger protein 38		15	92	Rnf38	ring finger protein 38		15	92	Rnf38	ring finger protein 38		15	92	Rnf38	ring finger protein 38		15	92	Rnf38	ring finger protein 38		15	92	Rnf38	ring finger protein 38		15	92	Rnf38	ring finger protein 38		15	92	Rnf38	ring finger protein 38		15	92	Rnf38	ring finger protein 38
16	92	Pde5a	phosphodiesterase 5A, cGMP-specific		16	92	Pde5a	phosphodiesterase 5A, cGMP-specific		16	92	Pde5a	phosphodiesterase 5A, cGMP-specific		16	92	Pde5a	phosphodiesterase 5A, cGMP-specific		16	92	Pde5a	phosphodiesterase 5A, cGMP-specific		16	92	Pde5a	phosphodiesterase 5A, cGMP-specific		16	92	Pde5a	phosphodiesterase 5A, cGMP-specific		16	92	Pde5a	phosphodiesterase 5A, cGMP-specific		16	92	Pde5a	phosphodiesterase 5A, cGMP-specific		16	92	Pde5a	phosphodiesterase 5A, cGMP-specific
17	92	Ppp1r2	protein phosphatase 1, regulatory (inhibitor) subunit 2		17	92	Ppp1r2	protein phosphatase 1, regulatory (inhibitor) subunit 2		17	92	Ppp1r2	protein phosphatase 1, regulatory (inhibitor) subunit 2		17	92	Ppp1r2	protein phosphatase 1, regulatory (inhibitor) subunit 2		17	92	Ppp1r2	protein phosphatase 1, regulatory (inhibitor) subunit 2		17	92	Ppp1r2	protein phosphatase 1, regulatory (inhibitor) subunit 2		17	92	Ppp1r2	protein phosphatase 1, regulatory (inhibitor) subunit 2		17	92	Ppp1r2	protein phosphatase 1, regulatory (inhibitor) subunit 2		17	92	Ppp1r2	protein phosphatase 1, regulatory (inhibitor) subunit 2		17	92	Ppp1r2	protein phosphatase 1, regulatory (inhibitor) subunit 2
18	92	Ston2	stonin 2		18	92	Ston2	stonin 2		18	92	Ston2	stonin 2		18	92	Ston2	stonin 2		18	92	Ston2	stonin 2		18	92	Ston2	stonin 2		18	92	Ston2	stonin 2		18	92	Ston2	stonin 2		18	92	Ston2	stonin 2		18	92	Ston2	stonin 2
19	92	Hs6st3	heparan sulfate 6-O-sulfotransferase 3		19	92	Hs6st3	heparan sulfate 6-O-sulfotransferase 3		19	92	Hs6st3	heparan sulfate 6-O-sulfotransferase 3		19	92	Hs6st3	heparan sulfate 6-O-sulfotransferase 3		19	92	Hs6st3	heparan sulfate 6-O-sulfotransferase 3		19	92	Hs6st3	heparan sulfate 6-O-sulfotransferase 3		19	92	Hs6st3	heparan sulfate 6-O-sulfotransferase 3		19	92	Hs6st3	heparan sulfate 6-O-sulfotransferase 3		19	92	Hs6st3	heparan sulfate 6-O-sulfotransferase 3		19	92	Hs6st3	heparan sulfate 6-O-sulfotransferase 3
20	92	Chd7	chromodomain helicase DNA binding protein 7		20	92	Chd7	chromodomain helicase DNA binding protein 7		20	92	Chd7	chromodomain helicase DNA binding protein 7		20	92	Chd7	chromodomain helicase DNA binding protein 7		20	92	Chd7	chromodomain helicase DNA binding protein 7		20	92	Chd7	chromodomain helicase DNA binding protein 7		20	92	Chd7	chromodomain helicase DNA binding protein 7		20	92	Chd7	chromodomain helicase DNA binding protein 7		20	92	Chd7	chromodomain helicase DNA binding protein 7		20	92	Chd7	chromodomain helicase DNA binding protein 7
21	91	Eif5b	eukaryotic translation initiation factor 5B		21	91	Eif5b	eukaryotic translation initiation factor 5B		21	91	Eif5b	eukaryotic translation initiation factor 5B		21	91	Eif5b	eukaryotic translation initiation factor 5B		21	91	Eif5b	eukaryotic translation initiation factor 5B		21	91	Eif5b	eukaryotic translation initiation factor 5B		21	91	Eif5b	eukaryotic translation initiation factor 5B		21	91	Eif5b	eukaryotic translation initiation factor 5B		21	91	Eif5b	eukaryotic translation initiation factor 5B		21	91	Eif5b	eukaryotic translation initiation factor 5B
22	91	Usp42	ubiquitin specific peptidase 42		22	91	Usp42	ubiquitin specific peptidase 42		22	91	Usp42	ubiquitin specific peptidase 42		22	91	Usp42	ubiquitin specific peptidase 42		22	91	Usp42	ubiquitin specific peptidase 42		22	91	Usp42	ubiquitin specific peptidase 42		22	91	Usp42	ubiquitin specific peptidase 42		22	91	Usp42	ubiquitin specific peptidase 42		22	91	Usp42	ubiquitin specific peptidase 42		22	91	Usp42	ubiquitin specific peptidase 42
23	91	Spata16	spermatogenesis associated 16		23	91	Spata16	spermatogenesis associated 16		23	91	Spata16	spermatogenesis associated 16		23	91	Spata16	spermatogenesis associated 16		23	91	Spata16	spermatogenesis associated 16		23	91	Spata16	spermatogenesis associated 16		23	91	Spata16	spermatogenesis associated 16		23	91	Spata16	spermatogenesis associated 16		23	91	Spata16	spermatogenesis associated 16		23	91	Spata16	spermatogenesis associated 16
24	91	Slc24a3	solute carrier family 24 (sodium/potassium/calcium exchanger), member 3		24	91	Slc24a3	solute carrier family 24 (sodium/potassium/calcium exchanger), member 3		24	91	Slc24a3	solute carrier family 24 (sodium/potassium/calcium exchanger), member 3		24	91	Slc24a3	solute carrier family 24 (sodium/potassium/calcium exchanger), member 3		24	91	Slc24a3	solute carrier family 24 (sodium/potassium/calcium exchanger), member 3		24	91	Slc24a3	solute carrier family 24 (sodium/potassium/calcium exchanger), member 3		24	91	Slc24a3	solute carrier family 24 (sodium/potassium/calcium exchanger), member 3		24	91	Slc24a3	solute carrier family 24 (sodium/potassium/calcium exchanger), member 3		24	91	Slc24a3	solute carrier family 24 (sodium/potassium/calcium exchanger), member 3		24	91	Slc24a3	solute carrier family 24 (sodium/potassium/calcium exchanger), member 3
25	90	Rdx	radixin		25	90	Rdx	radixin		25	90	Rdx	radixin		25	90	Rdx	radixin		25	90	Rdx	radixin		25	90	Rdx	radixin		25	90	Rdx	radixin		25	90	Rdx	radixin		25	90	Rdx	radixin		25	90	Rdx	radixin
26	90	Wnt5a	wingless-type MMTV integration site family, member 5A		26	90	Wnt5a	wingless-type MMTV integration site family, member 5A		26	90	Wnt5a	wingless-type MMTV integration site family, member 5A		26	90	Wnt5a	wingless-type MMTV integration site family, member 5A		26	90	Wnt5a	wingless-type MMTV integration site family, member 5A		26	90	Wnt5a	wingless-type MMTV integration site family, member 5A		26	90	Wnt5a	wingless-type MMTV integration site family, member 5A		26	90	Wnt5a	wingless-type MMTV integration site family, member 5A		26	90	Wnt5a	wingless-type MMTV integration site family, member 5A		26	90	Wnt5a	wingless-type MMTV integration site family, member 5A
27	90	Vom2r75	vomeronasal 2 receptor, 75		27	90	Vom2r75	vomeronasal 2 receptor, 75		27	90	Vom2r75	vomeronasal 2 receptor, 75		27	90	Vom2r75	vomeronasal 2 receptor, 75		27	90	Vom2r75	vomeronasal 2 receptor, 75		27	90	Vom2r75	vomeronasal 2 receptor, 75		27	90	Vom2r75	vomeronasal 2 receptor, 75		27	90	Vom2r75	vomeronasal 2 receptor, 75		27	90	Vom2r75	vomeronasal 2 receptor, 75		27	90	Vom2r75	vomeronasal 2 receptor, 75
28	89	Bcap29	B-cell receptor-associated protein 29		28	89	Bcap29	B-cell receptor-associated protein 29		28	89	Bcap29	B-cell receptor-associated protein 29		28	89	Bcap29	B-cell receptor-associated protein 29		28	89	Bcap29	B-cell receptor-associated protein 29		28	89	Bcap29	B-cell receptor-associated protein 29		28	89	Bcap29	B-cell receptor-associated protein 29		28	89	Bcap29	B-cell receptor-associated protein 29		28	89	Bcap29	B-cell receptor-associated protein 29		28	89	Bcap29	B-cell receptor-associated protein 29
29	89	Pianp	PILR alpha associated neural protein		29	89	Pianp	PILR alpha associated neural protein		29	89	Pianp	PILR alpha associated neural protein		29	89	Pianp	PILR alpha associated neural protein		29	89	Pianp	PILR alpha associated neural protein		29	89	Pianp	PILR alpha associated neural protein		29	89	Pianp	PILR alpha associated neural protein		29	89	Pianp	PILR alpha associated neural protein		29	89	Pianp	PILR alpha associated neural protein		29	89	Pianp	PILR alpha associated neural protein
30	89	Hsbp1l1	heat shock factor binding protein 1-like 1		30	89	Hsbp1l1	heat shock factor binding protein 1-like 1		30	89	Hsbp1l1	heat shock factor binding protein 1-like 1		30	89	Hsbp1l1	heat shock factor binding protein 1-like 1		30	89	Hsbp1l1	heat shock factor binding protein 1-like 1		30	89	Hsbp1l1	heat shock factor binding protein 1-like 1		30	89	Hsbp1l1	heat shock factor binding protein 1-like 1		30	89	Hsbp1l1	heat shock factor binding protein 1-like 1		30	89	Hsbp1l1	heat shock factor binding protein 1-like 1		30	89	Hsbp1l1	heat shock factor binding protein 1-like 1
31	89	Ccdc23	coiled-coil domain containing 23		31	89	Ccdc23	coiled-coil domain containing 23		31	89	Ccdc23	coiled-coil domain containing 23		31	89	Ccdc23	coiled-coil domain containing 23		31	89	Ccdc23	coiled-coil domain containing 23		31	89	Ccdc23	coiled-coil domain containing 23		31	89	Ccdc23	coiled-coil domain containing 23		31	89	Ccdc23	coiled-coil domain containing 23		31	89	Ccdc23	coiled-coil domain containing 23		31	89	Ccdc23	coiled-coil domain containing 23
32	88	Phip	pleckstrin homology domain interacting protein		32	88	Phip	pleckstrin homology domain interacting protein		32	88	Phip	pleckstrin homology domain interacting protein		32	88	Phip	pleckstrin homology domain interacting protein		32	88	Phip	pleckstrin homology domain interacting protein		32	88	Phip	pleckstrin homology domain interacting protein		32	88	Phip	pleckstrin homology domain interacting protein		32	88	Phip	pleckstrin homology domain interacting protein		32	88	Phip	pleckstrin homology domain interacting protein		32	88	Phip	pleckstrin homology domain interacting protein
33	88	Ctgf	connective tissue growth factor		33	88	Ctgf	connective tissue growth factor		33	88	Ctgf	connective tissue growth factor		33	88	Ctgf	connective tissue growth factor		33	88	Ctgf	connective tissue growth factor		33	88	Ctgf	connective tissue growth factor		33	88	Ctgf	connective tissue growth factor		33	88	Ctgf	connective tissue growth factor		33	88	Ctgf	connective tissue growth factor		33	88	Ctgf	connective tissue growth factor
34	87	Sat1	spermidine/spermine N1-acetyl transferase 1		34	87	Sat1	spermidine/spermine N1-acetyl transferase 1		34	87	Sat1	spermidine/spermine N1-acetyl transferase 1		34	87	Sat1	spermidine/spermine N1-acetyl transferase 1		34	87	Sat1	spermidine/spermine N1-acetyl transferase 1		34	87	Sat1	spermidine/spermine N1-acetyl transferase 1		34	87	Sat1	spermidine/spermine N1-acetyl transferase 1		34	87	Sat1	spermidine/spermine N1-acetyl transferase 1		34	87	Sat1	spermidine/spermine N1-acetyl transferase 1		34	87	Sat1	spermidine/spermine N1-acetyl transferase 1
35	87	Isca2	iron-sulfur cluster assembly 2		35	87	Isca2	iron-sulfur cluster assembly 2		35	87	Isca2	iron-sulfur cluster assembly 2		35	87	Isca2	iron-sulfur cluster assembly 2		35	87	Isca2	iron-sulfur cluster assembly 2		35	87	Isca2	iron-sulfur cluster assembly 2		35	87	Isca2	iron-sulfur cluster assembly 2		35	87	Isca2	iron-sulfur cluster assembly 2		35	87	Isca2	iron-sulfur cluster assembly 2		35	87	Isca2	iron-sulfur cluster assembly 2
36	87	Chst3	carbohydrate (chondroitin 6) sulfotransferase 3		36	87	Chst3	carbohydrate (chondroitin 6) sulfotransferase 3		36	87	Chst3	carbohydrate (chondroitin 6) sulfotransferase 3		36	87	Chst3	carbohydrate (chondroitin 6) sulfotransferase 3		36	87	Chst3	carbohydrate (chondroitin 6) sulfotransferase 3		36	87	Chst3	carbohydrate (chondroitin 6) sulfotransferase 3		36	87	Chst3	carbohydrate (chondroitin 6) sulfotransferase 3		36	87	Chst3	carbohydrate (chondroitin 6) sulfotransferase 3		36	87	Chst3	carbohydrate (chondroitin 6) sulfotransferase 3		36	87	Chst3	carbohydrate (chondroitin 6) sulfotransferase 3
37	87	Lppr4	lipid phosphate phosphatase-related protein type 4		37	87	Lppr4	lipid phosphate phosphatase-related protein type 4		37	87	Lppr4	lipid phosphate phosphatase-related protein type 4		37	87	Lppr4	lipid phosphate phosphatase-related protein type 4		37	87	Lppr4	lipid phosphate phosphatase-related protein type 4		37	87	Lppr4	lipid phosphate phosphatase-related protein type 4		37	87	Lppr4	lipid phosphate phosphatase-related protein type 4		37	87	Lppr4	lipid phosphate phosphatase-related protein type 4		37	87	Lppr4	lipid phosphate phosphatase-related protein type 4		37	87	Lppr4	lipid phosphate phosphatase-related protein type 4
38	87	Ankrd1	ankyrin repeat domain 1		38	87	Ankrd1	ankyrin repeat domain 1		38	87	Ankrd1	ankyrin repeat domain 1		38	87	Ankrd1	ankyrin repeat domain 1		38	87	Ankrd1	ankyrin repeat domain 1		38	87	Ankrd1	ankyrin repeat domain 1		38	87	Ankrd1	ankyrin repeat domain 1		38	87	Ankrd1	ankyrin repeat domain 1		38	87	Ankrd1	ankyrin repeat domain 1		38	87	Ankrd1	ankyrin repeat domain 1
39	87	Trrap	transformation/transcription domain-associated protein		39	87	Trrap	transformation/transcription domain-associated protein		39	87	Trrap	transformation/transcription domain-associated protein		39	87	Trrap	transformation/transcription domain-associated protein		39	87	Trrap	transformation/transcription domain-associated protein		39	87	Trrap	transformation/transcription domain-associated protein		39	87	Trrap	transformation/transcription domain-associated protein		39	87	Trrap	transformation/transcription domain-associated protein		39	87	Trrap	transformation/transcription domain-associated protein		39	87	Trrap	transformation/transcription domain-associated protein
40	87	Hspa5	heat shock protein 5		40	87	Hspa5	heat shock protein 5		40	87	Hspa5	heat shock protein 5		40	87	Hspa5	heat shock protein 5		40	87	Hspa5	heat shock protein 5		40	87	Hspa5	heat shock protein 5		40	87	Hspa5	heat shock protein 5		40	87	Hspa5	heat shock protein 5		40	87	Hspa5	heat shock protein 5		40	87	Hspa5	heat shock protein 5
41	87	Pgrmc2	progesterone receptor membrane component 2		41	87	Pgrmc2	progesterone receptor membrane component 2		41	87	Pgrmc2	progesterone receptor membrane component 2		41	87	Pgrmc2	progesterone receptor membrane component 2		41	87	Pgrmc2	progesterone receptor membrane component 2		41	87	Pgrmc2	progesterone receptor membrane component 2		41	87	Pgrmc2	progesterone receptor membrane component 2		41	87	Pgrmc2	progesterone receptor membrane component 2		41	87	Pgrmc2	progesterone receptor membrane component 2		41	87	Pgrmc2	progesterone receptor membrane component 2
42	86	Wapal	wings apart-like homolog (Drosophila)		42	86	Wapal	wings apart-like homolog (Drosophila)		42	86	Wapal	wings apart-like homolog (Drosophila)		42	86	Wapal	wings apart-like homolog (Drosophila)		42	86	Wapal	wings apart-like homolog (Drosophila)		42	86	Wapal	wings apart-like homolog (Drosophila)		42	86	Wapal	wings apart-like homolog (Drosophila)		42	86	Wapal	wings apart-like homolog (Drosophila)		42	86	Wapal	wings apart-like homolog (Drosophila)		42	86	Wapal	wings apart-like homolog (Drosophila)
43	86	Traf3	Tnf receptor-associated factor 3		43	86	Traf3	Tnf receptor-associated factor 3		43	86	Traf3	Tnf receptor-associated factor 3		43	86	Traf3	Tnf receptor-associated factor 3		43	86	Traf3	Tnf receptor-associated factor 3		43	86	Traf3	Tnf receptor-associated factor 3		43	86	Traf3	Tnf receptor-associated factor 3		43	86	Traf3	Tnf receptor-associated factor 3		43	86	Traf3	Tnf receptor-associated factor 3		43	86	Traf3	Tnf receptor-associated factor 3
44	86	Ei24	etoposide induced 2.4		44	86	Ei24	etoposide induced 2.4		44	86	Ei24	etoposide induced 2.4		44	86	Ei24	etoposide induced 2.4		44	86	Ei24	etoposide induced 2.4		44	86	Ei24	etoposide induced 2.4		44	86	Ei24	etoposide induced 2.4		44	86	Ei24	etoposide induced 2.4		44	86	Ei24	etoposide induced 2.4		44	86	Ei24	etoposide induced 2.4
45	86	Msl1	male-specific lethal 1 homolog (Drosophila)		45	86	Msl1	male-specific lethal 1 homolog (Drosophila)		45	86	Msl1	male-specific lethal 1 homolog (Drosophila)		45	86	Msl1	male-specific lethal 1 homolog (Drosophila)		45	86	Msl1	male-specific lethal 1 homolog (Drosophila)		45	86	Msl1	male-specific lethal 1 homolog (Drosophila)		45	86	Msl1	male-specific lethal 1 homolog (Drosophila)		45	86	Msl1	male-specific lethal 1 homolog (Drosophila)		45	86	Msl1	male-specific lethal 1 homolog (Drosophila)		45	86	Msl1	male-specific lethal 1 homolog (Drosophila)
46	86	Sh3pxd2a	SH3 and PX domains 2A		46	86	Sh3pxd2a	SH3 and PX domains 2A		46	86	Sh3pxd2a	SH3 and PX domains 2A		46	86	Sh3pxd2a	SH3 and PX domains 2A		46	86	Sh3pxd2a	SH3 and PX domains 2A		46	86	Sh3pxd2a	SH3 and PX domains 2A		46	86	Sh3pxd2a	SH3 and PX domains 2A		46	86	Sh3pxd2a	SH3 and PX domains 2A		46	86	Sh3pxd2a	SH3 and PX domains 2A		46	86	Sh3pxd2a	SH3 and PX domains 2A
47	85	Mapk14	mitogen activated protein kinase 14		47	85	Mapk14	mitogen activated protein kinase 14		47	85	Mapk14	mitogen activated protein kinase 14		47	85	Mapk14	mitogen activated protein kinase 14		47	85	Mapk14	mitogen activated protein kinase 14		47	85	Mapk14	mitogen activated protein kinase 14		47	85	Mapk14	mitogen activated protein kinase 14		47	85	Mapk14	mitogen activated protein kinase 14		47	85	Mapk14	mitogen activated protein kinase 14		47	85	Mapk14	mitogen activated protein kinase 14
48	85	Serbp1	Serpine1 mRNA binding protein 1		48	85	Serbp1	Serpine1 mRNA binding protein 1		48	85	Serbp1	Serpine1 mRNA binding protein 1		48	85	Serbp1	Serpine1 mRNA binding protein 1		48	85	Serbp1	Serpine1 mRNA binding protein 1		48	85	Serbp1	Serpine1 mRNA binding protein 1		48	85	Serbp1	Serpine1 mRNA binding protein 1		48	85	Serbp1	Serpine1 mRNA binding protein 1		48	85	Serbp1	Serpine1 mRNA binding protein 1		48	85	Serbp1	Serpine1 mRNA binding protein 1
49	85	Pdcd4	programmed cell death 4		49	85	Pdcd4	programmed cell death 4		49	85	Pdcd4	programmed cell death 4		49	85	Pdcd4	programmed cell death 4		49	85	Pdcd4	programmed cell death 4		49	85	Pdcd4	programmed cell death 4		49	85	Pdcd4	programmed cell death 4		49	85	Pdcd4	programmed cell death 4		49	85	Pdcd4	programmed cell death 4		49	85	Pdcd4	programmed cell death 4
50	84	Atg12	autophagy related 12		50	84	Atg12	autophagy related 12		50	84	Atg12	autophagy related 12		50	84	Atg12	autophagy related 12		50	84	Atg12	autophagy related 12		50	84	Atg12	autophagy related 12		50	84	Atg12	autophagy related 12		50	84	Atg12	autophagy related 12		50	84	Atg12	autophagy related 12		50	84	Atg12	autophagy related 12
51	83	Atp8a1	ATPase, aminophospholipid transporter (APLT), class I, type 8A, member 1		51	83	Atp8a1	ATPase, aminophospholipid transporter (APLT), class I, type 8A, member 1		51	83	Atp8a1	ATPase, aminophospholipid transporter (APLT), class I, type 8A, member 1		51	83	Atp8a1	ATPase, aminophospholipid transporter (APLT), class I, type 8A, member 1		51	83	Atp8a1	ATPase, aminophospholipid transporter (APLT), class I, type 8A, member 1		51	83	Atp8a1	ATPase, aminophospholipid transporter (APLT), class I, type 8A, member 1		51	83	Atp8a1	ATPase, aminophospholipid transporter (APLT), class I, type 8A, member 1		51	83	Atp8a1	ATPase, aminophospholipid transporter (APLT), class I, type 8A, member 1		51	83	Atp8a1	ATPase, aminophospholipid transporter (APLT), class I, type 8A, member 1		51	83	Atp8a1	ATPase, aminophospholipid transporter (APLT), class I, type 8A, member 1
52	83	Arnt2	aryl hydrocarbon receptor nuclear translocator 2		52	83	Arnt2	aryl hydrocarbon receptor nuclear translocator 2		52	83	Arnt2	aryl hydrocarbon receptor nuclear translocator 2		52	83	Arnt2	aryl hydrocarbon receptor nuclear translocator 2		52	83	Arnt2	aryl hydrocarbon receptor nuclear translocator 2		52	83	Arnt2	aryl hydrocarbon receptor nuclear translocator 2		52	83	Arnt2	aryl hydrocarbon receptor nuclear translocator 2		52	83	Arnt2	aryl hydrocarbon receptor nuclear translocator 2		52	83	Arnt2	aryl hydrocarbon receptor nuclear translocator 2		52	83	Arnt2	aryl hydrocarbon receptor nuclear translocator 2
53	83	Nfya	nuclear transcription factor-Y alpha		53	83	Nfya	nuclear transcription factor-Y alpha		53	83	Nfya	nuclear transcription factor-Y alpha		53	83	Nfya	nuclear transcription factor-Y alpha		53	83	Nfya	nuclear transcription factor-Y alpha		53	83	Nfya	nuclear transcription factor-Y alpha		53	83	Nfya	nuclear transcription factor-Y alpha		53	83	Nfya	nuclear transcription factor-Y alpha		53	83	Nfya	nuclear transcription factor-Y alpha		53	83	Nfya	nuclear transcription factor-Y alpha
54	83	Mex3c	mex-3 RNA binding family member C		54	83	Mex3c	mex-3 RNA binding family member C		54	83	Mex3c	mex-3 RNA binding family member C		54	83	Mex3c	mex-3 RNA binding family member C		54	83	Mex3c	mex-3 RNA binding family member C		54	83	Mex3c	mex-3 RNA binding family member C		54	83	Mex3c	mex-3 RNA binding family member C		54	83	Mex3c	mex-3 RNA binding family member C		54	83	Mex3c	mex-3 RNA binding family member C		54	83	Mex3c	mex-3 RNA binding family member C
55	83	Hivep2	human immunodeficiency virus type I enhancer binding protein 2		55	83	Hivep2	human immunodeficiency virus type I enhancer binding protein 2		55	83	Hivep2	human immunodeficiency virus type I enhancer binding protein 2		55	83	Hivep2	human immunodeficiency virus type I enhancer binding protein 2		55	83	Hivep2	human immunodeficiency virus type I enhancer binding protein 2		55	83	Hivep2	human immunodeficiency virus type I enhancer binding protein 2		55	83	Hivep2	human immunodeficiency virus type I enhancer binding protein 2		55	83	Hivep2	human immunodeficiency virus type I enhancer binding protein 2		55	83	Hivep2	human immunodeficiency virus type I enhancer binding protein 2		55	83	Hivep2	human immunodeficiency virus type I enhancer binding protein 2
56	82	C1galt1c1	C1GALT1-specific chaperone 1		56	82	C1galt1c1	C1GALT1-specific chaperone 1		56	82	C1galt1c1	C1GALT1-specific chaperone 1		56	82	C1galt1c1	C1GALT1-specific chaperone 1		56	82	C1galt1c1	C1GALT1-specific chaperone 1		56	82	C1galt1c1	C1GALT1-specific chaperone 1		56	82	C1galt1c1	C1GALT1-specific chaperone 1		56	82	C1galt1c1	C1GALT1-specific chaperone 1		56	82	C1galt1c1	C1GALT1-specific chaperone 1		56	82	C1galt1c1	C1GALT1-specific chaperone 1
57	82	Cyb5b	cytochrome b5 type B (outer mitochondrial membrane)		57	82	Cyb5b	cytochrome b5 type B (outer mitochondrial membrane)		57	82	Cyb5b	cytochrome b5 type B (outer mitochondrial membrane)		57	82	Cyb5b	cytochrome b5 type B (outer mitochondrial membrane)		57	82	Cyb5b	cytochrome b5 type B (outer mitochondrial membrane)		57	82	Cyb5b	cytochrome b5 type B (outer mitochondrial membrane)		57	82	Cyb5b	cytochrome b5 type B (outer mitochondrial membrane)		57	82	Cyb5b	cytochrome b5 type B (outer mitochondrial membrane)		57	82	Cyb5b	cytochrome b5 type B (outer mitochondrial membrane)		57	82	Cyb5b	cytochrome b5 type B (outer mitochondrial membrane)
58	82	Rsu1	Ras suppressor protein 1		58	82	Rsu1	Ras suppressor protein 1		58	82	Rsu1	Ras suppressor protein 1		58	82	Rsu1	Ras suppressor protein 1		58	82	Rsu1	Ras suppressor protein 1		58	82	Rsu1	Ras suppressor protein 1		58	82	Rsu1	Ras suppressor protein 1		58	82	Rsu1	Ras suppressor protein 1		58	82	Rsu1	Ras suppressor protein 1		58	82	Rsu1	Ras suppressor protein 1
59	82	Tanc2	tetratricopeptide repeat, ankyrin repeat and coiled-coil containing 2		59	82	Tanc2	tetratricopeptide repeat, ankyrin repeat and coiled-coil containing 2		59	82	Tanc2	tetratricopeptide repeat, ankyrin repeat and coiled-coil containing 2		59	82	Tanc2	tetratricopeptide repeat, ankyrin repeat and coiled-coil containing 2		59	82	Tanc2	tetratricopeptide repeat, ankyrin repeat and coiled-coil containing 2		59	82	Tanc2	tetratricopeptide repeat, ankyrin repeat and coiled-coil containing 2		59	82	Tanc2	tetratricopeptide repeat, ankyrin repeat and coiled-coil containing 2		59	82	Tanc2	tetratricopeptide repeat, ankyrin repeat and coiled-coil containing 2		59	82	Tanc2	tetratricopeptide repeat, ankyrin repeat and coiled-coil containing 2		59	82	Tanc2	tetratricopeptide repeat, ankyrin repeat and coiled-coil containing 2
60	81	Ubap1	ubiquitin-associated protein 1		60	81	Ubap1	ubiquitin-associated protein 1		60	81	Ubap1	ubiquitin-associated protein 1		60	81	Ubap1	ubiquitin-associated protein 1		60	81	Ubap1	ubiquitin-associated protein 1		60	81	Ubap1	ubiquitin-associated protein 1		60	81	Ubap1	ubiquitin-associated protein 1		60	81	Ubap1	ubiquitin-associated protein 1		60	81	Ubap1	ubiquitin-associated protein 1		60	81	Ubap1	ubiquitin-associated protein 1
61	81	Bai3	brain-specific angiogenesis inhibitor 3		61	81	Bai3	brain-specific angiogenesis inhibitor 3		61	81	Bai3	brain-specific angiogenesis inhibitor 3		61	81	Bai3	brain-specific angiogenesis inhibitor 3		61	81	Bai3	brain-specific angiogenesis inhibitor 3		61	81	Bai3	brain-specific angiogenesis inhibitor 3		61	81	Bai3	brain-specific angiogenesis inhibitor 3		61	81	Bai3	brain-specific angiogenesis inhibitor 3		61	81	Bai3	brain-specific angiogenesis inhibitor 3		61	81	Bai3	brain-specific angiogenesis inhibitor 3
62	80	Zcchc2	zinc finger, CCHC domain containing 2		62	80	Zcchc2	zinc finger, CCHC domain containing 2		62	80	Zcchc2	zinc finger, CCHC domain containing 2		62	80	Zcchc2	zinc finger, CCHC domain containing 2		62	80	Zcchc2	zinc finger, CCHC domain containing 2		62	80	Zcchc2	zinc finger, CCHC domain containing 2		62	80	Zcchc2	zinc finger, CCHC domain containing 2		62	80	Zcchc2	zinc finger, CCHC domain containing 2		62	80	Zcchc2	zinc finger, CCHC domain containing 2		62	80	Zcchc2	zinc finger, CCHC domain containing 2
63	80	Mapre1	microtubule-associated protein, RP/EB family, member 1		63	80	Mapre1	microtubule-associated protein, RP/EB family, member 1		63	80	Mapre1	microtubule-associated protein, RP/EB family, member 1		63	80	Mapre1	microtubule-associated protein, RP/EB family, member 1		63	80	Mapre1	microtubule-associated protein, RP/EB family, member 1		63	80	Mapre1	microtubule-associated protein, RP/EB family, member 1		63	80	Mapre1	microtubule-associated protein, RP/EB family, member 1		63	80	Mapre1	microtubule-associated protein, RP/EB family, member 1		63	80	Mapre1	microtubule-associated protein, RP/EB family, member 1		63	80	Mapre1	microtubule-associated protein, RP/EB family, member 1
64	80	Asap2	ArfGAP with SH3 domain, ankyrin repeat and PH domain 2		64	80	Asap2	ArfGAP with SH3 domain, ankyrin repeat and PH domain 2		64	80	Asap2	ArfGAP with SH3 domain, ankyrin repeat and PH domain 2		64	80	Asap2	ArfGAP with SH3 domain, ankyrin repeat and PH domain 2		64	80	Asap2	ArfGAP with SH3 domain, ankyrin repeat and PH domain 2		64	80	Asap2	ArfGAP with SH3 domain, ankyrin repeat and PH domain 2		64	80	Asap2	ArfGAP with SH3 domain, ankyrin repeat and PH domain 2		64	80	Asap2	ArfGAP with SH3 domain, ankyrin repeat and PH domain 2		64	80	Asap2	ArfGAP with SH3 domain, ankyrin repeat and PH domain 2		64	80	Asap2	ArfGAP with SH3 domain, ankyrin repeat and PH domain 2
65	80	Btbd7	BTB (POZ) domain containing 7		65	80	Btbd7	BTB (POZ) domain containing 7		65	80	Btbd7	BTB (POZ) domain containing 7		65	80	Btbd7	BTB (POZ) domain containing 7		65	80	Btbd7	BTB (POZ) domain containing 7		65	80	Btbd7	BTB (POZ) domain containing 7		65	80	Btbd7	BTB (POZ) domain containing 7		65	80	Btbd7	BTB (POZ) domain containing 7		65	80	Btbd7	BTB (POZ) domain containing 7		65	80	Btbd7	BTB (POZ) domain containing 7
66	80	Mllt10	myeloid/lymphoid or mixed-lineage leukemia (trithorax homolog, Drosophila); translocated to, 10		66	80	Mllt10	myeloid/lymphoid or mixed-lineage leukemia (trithorax homolog, Drosophila); translocated to, 10		66	80	Mllt10	myeloid/lymphoid or mixed-lineage leukemia (trithorax homolog, Drosophila); translocated to, 10		66	80	Mllt10	myeloid/lymphoid or mixed-lineage leukemia (trithorax homolog, Drosophila); translocated to, 10		66	80	Mllt10	myeloid/lymphoid or mixed-lineage leukemia (trithorax homolog, Drosophila); translocated to, 10		66	80	Mllt10	myeloid/lymphoid or mixed-lineage leukemia (trithorax homolog, Drosophila); translocated to, 10		66	80	Mllt10	myeloid/lymphoid or mixed-lineage leukemia (trithorax homolog, Drosophila); translocated to, 10		66	80	Mllt10	myeloid/lymphoid or mixed-lineage leukemia (trithorax homolog, Drosophila); translocated to, 10		66	80	Mllt10	myeloid/lymphoid or mixed-lineage leukemia (trithorax homolog, Drosophila); translocated to, 10		66	80	Mllt10	myeloid/lymphoid or mixed-lineage leukemia (trithorax homolog, Drosophila); translocated to, 10
1	100	Abcg4	ATP-binding cassette, subfamily G (WHITE), member 4		1	100	Abcg4	ATP-binding cassette, subfamily G (WHITE), member 4		1	100	Abcg4	ATP-binding cassette, subfamily G (WHITE), member 4		1	99	Arel1	apoptosis resistant E3 ubiquitin protein ligase 1		1	100	Arid2	AT rich interactive domain 2 (Arid-rfx like)		1	99	Cpeb2	cytoplasmic polyadenylation element binding protein 2		1	100	Abcg4	ATP-binding cassette, subfamily G (WHITE), member 4		1	100	Abcg4	ATP-binding cassette, subfamily G (WHITE), member 4		1	97	Bcor	BCL6 co-repressor		1	97	Bcor	BCL6 co-repressor
2	100	Arel1	apoptosis resistant E3 ubiquitin protein ligase 1		2	100	Arel1	apoptosis resistant E3 ubiquitin protein ligase 1		2	100	Arel1	apoptosis resistant E3 ubiquitin protein ligase 1		2	99	Abcg4	ATP-binding cassette, subfamily G (WHITE), member 4		2	99	Nfia	nuclear factor I/A		2	99	Terf1	telomeric repeat binding factor (NIMA-interacting) 1		2	100	Arel1	apoptosis resistant E3 ubiquitin protein ligase 1		2	100	Arel1	apoptosis resistant E3 ubiquitin protein ligase 1		2	96	Slitrk1	SLIT and NTRK-like family, member 1		2	96	Slitrk1	SLIT and NTRK-like family, member 1
3	100	Tifab	TRAF-interacting protein with forkhead-associated domain, family member B		3	100	Tifab	TRAF-interacting protein with forkhead-associated domain, family member B		3	100	Tifab	TRAF-interacting protein with forkhead-associated domain, family member B		3	99	Gpr157	G protein-coupled receptor 157		3	99	Xrn1	5'-3' exoribonuclease 1		3	99	St18	suppression of tumorigenicity 18		3	100	Tifab	TRAF-interacting protein with forkhead-associated domain, family member B		3	100	Tifab	TRAF-interacting protein with forkhead-associated domain, family member B		3	94	Egfl6	EGF-like-domain, multiple 6		3	94	Egfl6	EGF-like-domain, multiple 6
4	100	Fam53b	family with sequence similarity 53, member B		4	100	Fam53b	family with sequence similarity 53, member B		4	100	Fam53b	family with sequence similarity 53, member B		4	97	Ebf3	early B-cell factor 3		4	99	Bmpr2	bone morphogenetic protein receptor, type II (serine/threonine kinase)		4	97	Grk5	G protein-coupled receptor kinase 5		4	100	Fam53b	family with sequence similarity 53, member B		4	100	Fam53b	family with sequence similarity 53, member B		4	93	Phip	pleckstrin homology domain interacting protein		4	93	Phip	pleckstrin homology domain interacting protein
5	100	Gpr157	G protein-coupled receptor 157		5	100	Gpr157	G protein-coupled receptor 157		5	100	Gpr157	G protein-coupled receptor 157		5	97	Bmpr1a	bone morphogenetic protein receptor, type IA		5	98	Gpr116	G protein-coupled receptor 116		5	97	Akap10	A kinase (PRKA) anchor protein 10		5	100	Gpr157	G protein-coupled receptor 157		5	100	Gpr157	G protein-coupled receptor 157		5	92	Pcdh9	protocadherin 9		5	92	Pcdh9	protocadherin 9
6	100	Sephs1	selenophosphate synthetase 1		6	100	Sephs1	selenophosphate synthetase 1		6	100	Sephs1	selenophosphate synthetase 1		6	96	Tmem182	transmembrane protein 182		6	98	Rab9b	RAB9B, member RAS oncogene family		6	97	Zfp770	zinc finger protein 770		6	100	Sephs1	selenophosphate synthetase 1		6	100	Sephs1	selenophosphate synthetase 1		6	91	Cd53	Cd53 molecule		6	91	Cd53	Cd53 molecule
7	100	Prkcb	protein kinase C, beta		7	100	Prkcb	protein kinase C, beta		7	100	Prkcb	protein kinase C, beta		7	96	Osm	oncostatin M		7	97	Atp2b2	ATPase, Ca++ transporting, plasma membrane 2		7	97	Snca	synuclein, alpha (non A4 component of amyloid precursor)		7	100	Prkcb	protein kinase C, beta		7	100	Prkcb	protein kinase C, beta		7	88	Stac	SH3 and cysteine rich domain		7	88	Stac	SH3 and cysteine rich domain
8	99	Wdr48	WD repeat domain 48		8	99	Wdr48	WD repeat domain 48		8	99	Wdr48	WD repeat domain 48		8	95	Crebrf	CREB3 regulatory factor		8	97	Grm3	glutamate receptor, metabotropic 3		8	97	Slc4a7	solute carrier family 4, sodium bicarbonate cotransporter, member 7		8	99	Wdr48	WD repeat domain 48		8	99	Wdr48	WD repeat domain 48		8	87	Elavl2	ELAV like neuron-specific RNA binding protein 2		8	87	Elavl2	ELAV like neuron-specific RNA binding protein 2
9	99	Bmpr1a	bone morphogenetic protein receptor, type IA		9	99	Bmpr1a	bone morphogenetic protein receptor, type IA		9	99	Bmpr1a	bone morphogenetic protein receptor, type IA		9	95	Hnrnpf	heterogeneous nuclear ribonucleoprotein F		9	97	Angpt1	angiopoietin 1		9	97	Ric3	RIC3 acetylcholine receptor chaperone		9	99	Bmpr1a	bone morphogenetic protein receptor, type IA		9	99	Bmpr1a	bone morphogenetic protein receptor, type IA		9	87	Klhl28	kelch-like family member 28		9	87	Klhl28	kelch-like family member 28
10	99	Ebf3	early B-cell factor 3		10	99	Ebf3	early B-cell factor 3		10	99	Ebf3	early B-cell factor 3		10	94	Dstnl1	destrin-like 1		10	96	Arrdc3	arrestin domain containing 3		10	96	Nfya	nuclear transcription factor-Y alpha		10	99	Ebf3	early B-cell factor 3		10	99	Ebf3	early B-cell factor 3		10	86	Fam134c	family with sequence similarity 134, member C		10	86	Fam134c	family with sequence similarity 134, member C
11	99	Ino80c	INO80 complex subunit C		11	99	Ino80c	INO80 complex subunit C		11	99	Ino80c	INO80 complex subunit C		11	94	Ino80c	INO80 complex subunit C		11	95	Acly	ATP citrate lyase		11	95	Sgpp1	sphingosine-1-phosphate phosphatase 1		11	99	Ino80c	INO80 complex subunit C		11	99	Ino80c	INO80 complex subunit C		11	85	Col4a5	collagen, type IV, alpha 5		11	85	Col4a5	collagen, type IV, alpha 5
12	99	Nell2	NEL-like 2 (chicken)		12	99	Nell2	NEL-like 2 (chicken)		12	99	Nell2	NEL-like 2 (chicken)		12	94	Pigv	phosphatidylinositol glycan anchor biosynthesis, class V		12	94	Ibtk	inhibitor of Bruton agammaglobulinemia tyrosine kinase		12	94	Gabrb2	gamma-aminobutyric acid (GABA) A receptor, beta 2		12	99	Nell2	NEL-like 2 (chicken)		12	99	Nell2	NEL-like 2 (chicken)		12	84	Cbx5	chromobox homolog 5		12	84	Cbx5	chromobox homolog 5
13	99	Tmem132d	transmembrane protein 132D		13	99	Tmem132d	transmembrane protein 132D		13	99	Tmem132d	transmembrane protein 132D		13	93	Plcxd2	phosphatidylinositol-specific phospholipase C, X domain containing 2		13	94	Amot	angiomotin		13	94	Kctd13	potassium channel tetramerization domain containing 13		13	99	Tmem132d	transmembrane protein 132D		13	99	Tmem132d	transmembrane protein 132D		13	84	Synj1	synaptojanin 1		13	84	Synj1	synaptojanin 1
14	99	Kcnk1	potassium channel, subfamily K, member 1		14	99	Kcnk1	potassium channel, subfamily K, member 1		14	99	Kcnk1	potassium channel, subfamily K, member 1		14	93	Ubash3b	ubiquitin associated and SH3 domain containing, B		14	94	Mfsd1	major facilitator superfamily domain containing 1		14	94	Pdpk1	3-phosphoinositide dependent protein kinase-1		14	99	Kcnk1	potassium channel, subfamily K, member 1		14	99	Kcnk1	potassium channel, subfamily K, member 1		14	84	Peli2	pellino E3 ubiquitin protein ligase family member 2		14	84	Peli2	pellino E3 ubiquitin protein ligase family member 2
15	99	Csf3r	colony stimulating factor 3 receptor (granulocyte)		15	99	Csf3r	colony stimulating factor 3 receptor (granulocyte)		15	99	Csf3r	colony stimulating factor 3 receptor (granulocyte)		15	93	Fam53b	family with sequence similarity 53, member B		15	94	Tle4	transducin-like enhancer of split 4 (E(sp1) homolog, Drosophila)		15	93	Ndufaf4	NADH dehydrogenase (ubiquinone) complex I, assembly factor 4		15	99	Csf3r	colony stimulating factor 3 receptor (granulocyte)		15	99	Csf3r	colony stimulating factor 3 receptor (granulocyte)		15	82	Sptlc1	serine palmitoyltransferase, long chain base subunit 1		15	82	Sptlc1	serine palmitoyltransferase, long chain base subunit 1
16	99	Dstnl1	destrin-like 1		16	99	Dstnl1	destrin-like 1		16	99	Dstnl1	destrin-like 1		16	93	Wdr48	WD repeat domain 48		16	93	Phip	pleckstrin homology domain interacting protein		16	93	Dpys	dihydropyrimidinase		16	99	Dstnl1	destrin-like 1		16	99	Dstnl1	destrin-like 1		16	82	RGD1562726	similar to Putative protein C21orf62 homolog		16	82	RGD1562726	similar to Putative protein C21orf62 homolog
17	99	Crebrf	CREB3 regulatory factor		17	99	Crebrf	CREB3 regulatory factor		17	99	Crebrf	CREB3 regulatory factor		17	93	Tifab	TRAF-interacting protein with forkhead-associated domain, family member B		17	93	Gpbp1	GC-rich promoter binding protein 1		17	92	RGD1309748	similar to CG4768-PA		17	99	Crebrf	CREB3 regulatory factor		17	99	Crebrf	CREB3 regulatory factor		17	81	Nyap2	neuronal tyrosine-phosphorylated phosphoinositide-3-kinase adaptor 2		17	81	Nyap2	neuronal tyrosine-phosphorylated phosphoinositide-3-kinase adaptor 2
18	99	Myo6	myosin VI		18	99	Myo6	myosin VI		18	99	Myo6	myosin VI		18	93	Abhd14a	abhydrolase domain containing 14A		18	93	Rmnd5a	required for meiotic nuclear division 5 homolog A (S. cerevisiae)		18	91	Ptprf	protein tyrosine phosphatase, receptor type, F		18	99	Myo6	myosin VI		18	99	Myo6	myosin VI		18	80	Ocrl	oculocerebrorenal syndrome of Lowe		18	80	Ocrl	oculocerebrorenal syndrome of Lowe
19	99	Ubash3b	ubiquitin associated and SH3 domain containing, B		19	99	Ubash3b	ubiquitin associated and SH3 domain containing, B		19	99	Ubash3b	ubiquitin associated and SH3 domain containing, B		19	92	Tmem132d	transmembrane protein 132D		19	93	Tdg	thymine-DNA glycosylase		19	91	Cmpk1	cytidine monophosphate (UMP-CMP) kinase 1		19	99	Ubash3b	ubiquitin associated and SH3 domain containing, B		19	99	Ubash3b	ubiquitin associated and SH3 domain containing, B		19	80	F2r	coagulation factor II (thrombin) receptor		19	80	F2r	coagulation factor II (thrombin) receptor
20	98	Lrtm2	leucine-rich repeats and transmembrane domains 2		20	98	Lrtm2	leucine-rich repeats and transmembrane domains 2		20	98	Lrtm2	leucine-rich repeats and transmembrane domains 2		20	92	Zbtb5	zinc finger and BTB domain containing 5		20	93	Sertad2	SERTA domain containing 2		20	91	Cdh5	cadherin 5		20	98	Lrtm2	leucine-rich repeats and transmembrane domains 2		20	98	Lrtm2	leucine-rich repeats and transmembrane domains 2		20	80	Uba6	ubiquitin-like modifier activating enzyme 6		20	80	Uba6	ubiquitin-like modifier activating enzyme 6
21	98	Pigv	phosphatidylinositol glycan anchor biosynthesis, class V		21	98	Pigv	phosphatidylinositol glycan anchor biosynthesis, class V		21	98	Pigv	phosphatidylinositol glycan anchor biosynthesis, class V		21	92	Brsk2	BR serine/threonine kinase 2		21	92	Grid2	glutamate receptor, ionotropic, delta 2		21	91	Rala	v-ral simian leukemia viral oncogene homolog A (ras related)		21	98	Pigv	phosphatidylinositol glycan anchor biosynthesis, class V		21	98	Pigv	phosphatidylinositol glycan anchor biosynthesis, class V		21	80	Zic3	Zic family member 3		21	80	Zic3	Zic family member 3
22	98	Slamf1	signaling lymphocytic activation molecule family member 1		22	98	Slamf1	signaling lymphocytic activation molecule family member 1		22	98	Slamf1	signaling lymphocytic activation molecule family member 1		22	92	Fbxo41	F-box protein 41		22	92	Scara5	scavenger receptor class A, member 5 (putative)		22	90	Unc5d	unc-5 homolog D (C. elegans)		22	98	Slamf1	signaling lymphocytic activation molecule family member 1		22	98	Slamf1	signaling lymphocytic activation molecule family member 1		1	99	Cpeb2	cytoplasmic polyadenylation element binding protein 2		1	99	Cpeb2	cytoplasmic polyadenylation element binding protein 2
23	98	Plcxd2	phosphatidylinositol-specific phospholipase C, X domain containing 2		23	98	Plcxd2	phosphatidylinositol-specific phospholipase C, X domain containing 2		23	98	Plcxd2	phosphatidylinositol-specific phospholipase C, X domain containing 2		23	92	Svep1	sushi, von Willebrand factor type A, EGF and pentraxin domain containing 1		23	92	Thumpd3	THUMP domain containing 3		23	90	Ptprb	protein tyrosine phosphatase, receptor type, B		23	98	Plcxd2	phosphatidylinositol-specific phospholipase C, X domain containing 2		23	98	Plcxd2	phosphatidylinositol-specific phospholipase C, X domain containing 2		2	99	Terf1	telomeric repeat binding factor (NIMA-interacting) 1		2	99	Terf1	telomeric repeat binding factor (NIMA-interacting) 1
24	98	Vps37b	vacuolar protein sorting 37 homolog B (S. cerevisiae)		24	98	Vps37b	vacuolar protein sorting 37 homolog B (S. cerevisiae)		24	98	Vps37b	vacuolar protein sorting 37 homolog B (S. cerevisiae)		24	91	Prkcb	protein kinase C, beta		24	91	LOC100361535	hypothetical LOC100361535		24	90	LOC689437	similar to vitamin A-deficient testicular protein 11-like		24	98	Vps37b	vacuolar protein sorting 37 homolog B (S. cerevisiae)		24	98	Vps37b	vacuolar protein sorting 37 homolog B (S. cerevisiae)		3	99	St18	suppression of tumorigenicity 18		3	99	St18	suppression of tumorigenicity 18
25	98	Ptpn7	protein tyrosine phosphatase, non-receptor type 7		25	98	Ptpn7	protein tyrosine phosphatase, non-receptor type 7		25	98	Ptpn7	protein tyrosine phosphatase, non-receptor type 7		25	91	Lrtm2	leucine-rich repeats and transmembrane domains 2		25	91	Trps1	trichorhinophalangeal syndrome I		25	90	Ccdc43	coiled-coil domain containing 43		25	98	Ptpn7	protein tyrosine phosphatase, non-receptor type 7		25	98	Ptpn7	protein tyrosine phosphatase, non-receptor type 7		4	97	Grk5	G protein-coupled receptor kinase 5		4	97	Grk5	G protein-coupled receptor kinase 5
26	98	Abhd14a	abhydrolase domain containing 14A		26	98	Abhd14a	abhydrolase domain containing 14A		26	98	Abhd14a	abhydrolase domain containing 14A		26	91	Sephs1	selenophosphate synthetase 1		26	91	Fgd5	FYVE, RhoGEF and PH domain containing 5		26	89	Ccar1	cell division cycle and apoptosis regulator 1		26	98	Abhd14a	abhydrolase domain containing 14A		26	98	Abhd14a	abhydrolase domain containing 14A		5	97	Akap10	A kinase (PRKA) anchor protein 10		5	97	Akap10	A kinase (PRKA) anchor protein 10
27	98	Svep1	sushi, von Willebrand factor type A, EGF and pentraxin domain containing 1		27	98	Svep1	sushi, von Willebrand factor type A, EGF and pentraxin domain containing 1		27	98	Svep1	sushi, von Willebrand factor type A, EGF and pentraxin domain containing 1		27	91	Nell2	NEL-like 2 (chicken)		27	90	Ippk	inositol 1,3,4,5,6-pentakisphosphate 2-kinase		27	89	Acnat2	acyl-coenzyme A amino acid N-acyltransferase 2		27	98	Svep1	sushi, von Willebrand factor type A, EGF and pentraxin domain containing 1		27	98	Svep1	sushi, von Willebrand factor type A, EGF and pentraxin domain containing 1		6	97	Zfp770	zinc finger protein 770		6	97	Zfp770	zinc finger protein 770
28	97	Avl9	AVL9 homolog (S. cerevisiase)		28	97	Avl9	AVL9 homolog (S. cerevisiase)		28	97	Avl9	AVL9 homolog (S. cerevisiase)		28	90	Mdga2	MAM domain containing glycosylphosphatidylinositol anchor 2		28	90	Cpsf7	cleavage and polyadenylation specific factor 7		28	88	Rab6a	RAB6A, member RAS oncogene family		28	97	Avl9	AVL9 homolog (S. cerevisiase)		28	97	Avl9	AVL9 homolog (S. cerevisiase)		7	97	Snca	synuclein, alpha (non A4 component of amyloid precursor)		7	97	Snca	synuclein, alpha (non A4 component of amyloid precursor)
29	97	RGD1304694	similar to CG9646-PA		29	97	RGD1304694	similar to CG9646-PA		29	97	RGD1304694	similar to CG9646-PA		29	90	Prrg3	proline rich Gla (G-carboxyglutamic acid) 3 (transmembrane)		29	90	Kcnk10	potassium channel, subfamily K, member 10		29	88	Slc5a7	solute carrier family 5 (sodium/choline cotransporter), member 7		29	97	RGD1304694	similar to CG9646-PA		29	97	RGD1304694	similar to CG9646-PA		8	97	Slc4a7	solute carrier family 4, sodium bicarbonate cotransporter, member 7		8	97	Slc4a7	solute carrier family 4, sodium bicarbonate cotransporter, member 7
30	97	Parvb	parvin, beta		30	97	Parvb	parvin, beta		30	97	Parvb	parvin, beta		30	90	Rock1	Rho-associated coiled-coil containing protein kinase 1		30	90	2017-09-07	septin 7		30	87	Pmch	pro-melanin-concentrating hormone		30	97	Parvb	parvin, beta		30	97	Parvb	parvin, beta		9	97	Ric3	RIC3 acetylcholine receptor chaperone		9	97	Ric3	RIC3 acetylcholine receptor chaperone
31	97	Amotl1	angiomotin-like 1		31	97	Amotl1	angiomotin-like 1		31	97	Amotl1	angiomotin-like 1		31	89	Bzw1	basic leucine zipper and W2 domains 1		31	89	Pik3cb	phosphatidylinositol-4,5-bisphosphate 3-kinase, catalytic subunit beta		31	87	Rock2	Rho-associated coiled-coil containing protein kinase 2		31	97	Amotl1	angiomotin-like 1		31	97	Amotl1	angiomotin-like 1		10	96	Nfya	nuclear transcription factor-Y alpha		10	96	Nfya	nuclear transcription factor-Y alpha
32	97	Trpm7	transient receptor potential cation channel, subfamily M, member 7		32	97	Trpm7	transient receptor potential cation channel, subfamily M, member 7		32	97	Trpm7	transient receptor potential cation channel, subfamily M, member 7		32	89	Vps37b	vacuolar protein sorting 37 homolog B (S. cerevisiae)		32	89	Esm1	endothelial cell-specific molecule 1		32	87	Rai1	retinoic acid induced 1		32	97	Trpm7	transient receptor potential cation channel, subfamily M, member 7		32	97	Trpm7	transient receptor potential cation channel, subfamily M, member 7		11	95	Sgpp1	sphingosine-1-phosphate phosphatase 1		11	95	Sgpp1	sphingosine-1-phosphate phosphatase 1
33	97	Prrg3	proline rich Gla (G-carboxyglutamic acid) 3 (transmembrane)		33	97	Prrg3	proline rich Gla (G-carboxyglutamic acid) 3 (transmembrane)		33	97	Prrg3	proline rich Gla (G-carboxyglutamic acid) 3 (transmembrane)		33	89	Sema4c	sema domain, immunoglobulin domain (Ig), transmembrane domain (TM) and short cytoplasmic domain, (semaphorin) 4C		33	89	Bmp2	bone morphogenetic protein 2		33	86	Bcl11a	B-cell CLL/lymphoma 11A (zinc finger protein)		33	97	Prrg3	proline rich Gla (G-carboxyglutamic acid) 3 (transmembrane)		33	97	Prrg3	proline rich Gla (G-carboxyglutamic acid) 3 (transmembrane)		12	94	Gabrb2	gamma-aminobutyric acid (GABA) A receptor, beta 2		12	94	Gabrb2	gamma-aminobutyric acid (GABA) A receptor, beta 2
34	97	Fbxo41	F-box protein 41		34	97	Fbxo41	F-box protein 41		34	97	Fbxo41	F-box protein 41		34	88	Cdk6	cyclin-dependent kinase 6		34	88	Galnt3	UDP-N-acetyl-alpha-D-galactosamine:polypeptide N-acetylgalactosaminyltransferase 3 (GalNAc-T3)		34	86	Fam196a	family with sequence similarity 196, member A		34	97	Fbxo41	F-box protein 41		34	97	Fbxo41	F-box protein 41		13	94	Kctd13	potassium channel tetramerization domain containing 13		13	94	Kctd13	potassium channel tetramerization domain containing 13
35	97	Tvp23a	trans-golgi network vesicle protein 23 homolog A (S. cerevisiae)		35	97	Tvp23a	trans-golgi network vesicle protein 23 homolog A (S. cerevisiae)		35	97	Tvp23a	trans-golgi network vesicle protein 23 homolog A (S. cerevisiae)		35	88	Trpm7	transient receptor potential cation channel, subfamily M, member 7		35	88	Gria2	glutamate receptor, ionotropic, AMPA 2		35	85	Rad23b	RAD23 homolog B (S. cerevisiae)		35	97	Tvp23a	trans-golgi network vesicle protein 23 homolog A (S. cerevisiae)		35	97	Tvp23a	trans-golgi network vesicle protein 23 homolog A (S. cerevisiae)		14	94	Pdpk1	3-phosphoinositide dependent protein kinase-1		14	94	Pdpk1	3-phosphoinositide dependent protein kinase-1
36	97	Gtlf3b	gene trap locus F3b		36	97	Gtlf3b	gene trap locus F3b		36	97	Gtlf3b	gene trap locus F3b		36	88	Ube2g2	ubiquitin-conjugating enzyme E2G 2		36	88	Csn2	casein beta		36	85	Arpc1b	actin related protein 2/3 complex, subunit 1B		36	97	Gtlf3b	gene trap locus F3b		36	97	Gtlf3b	gene trap locus F3b		15	93	Ndufaf4	NADH dehydrogenase (ubiquinone) complex I, assembly factor 4		15	93	Ndufaf4	NADH dehydrogenase (ubiquinone) complex I, assembly factor 4
37	97	Mdga2	MAM domain containing glycosylphosphatidylinositol anchor 2		37	97	Mdga2	MAM domain containing glycosylphosphatidylinositol anchor 2		37	97	Mdga2	MAM domain containing glycosylphosphatidylinositol anchor 2		37	88	Myo6	myosin VI		37	88	Rala	v-ral simian leukemia viral oncogene homolog A (ras related)		37	83	Hs2st1	heparan sulfate 2-O-sulfotransferase 1		37	97	Mdga2	MAM domain containing glycosylphosphatidylinositol anchor 2		37	97	Mdga2	MAM domain containing glycosylphosphatidylinositol anchor 2		16	93	Dpys	dihydropyrimidinase		16	93	Dpys	dihydropyrimidinase
38	96	Sema4c	sema domain, immunoglobulin domain (Ig), transmembrane domain (TM) and short cytoplasmic domain, (semaphorin) 4C		38	96	Sema4c	sema domain, immunoglobulin domain (Ig), transmembrane domain (TM) and short cytoplasmic domain, (semaphorin) 4C		38	96	Sema4c	sema domain, immunoglobulin domain (Ig), transmembrane domain (TM) and short cytoplasmic domain, (semaphorin) 4C		38	88	Csf3r	colony stimulating factor 3 receptor (granulocyte)		38	88	Supt20	suppressor of Ty 20		38	83	Fv1	Friend virus susceptibility 1		38	96	Sema4c	sema domain, immunoglobulin domain (Ig), transmembrane domain (TM) and short cytoplasmic domain, (semaphorin) 4C		38	96	Sema4c	sema domain, immunoglobulin domain (Ig), transmembrane domain (TM) and short cytoplasmic domain, (semaphorin) 4C		17	92	RGD1309748	similar to CG4768-PA		17	92	RGD1309748	similar to CG4768-PA
39	96	Tmem182	transmembrane protein 182		39	96	Tmem182	transmembrane protein 182		39	96	Tmem182	transmembrane protein 182		39	87	Pklr	pyruvate kinase, liver and RBC		39	87	Aldh3b2	aldehyde dehydrogenase 3 family, member B2		39	82	Arpc5	actin related protein 2/3 complex, subunit 5		39	96	Tmem182	transmembrane protein 182		39	96	Tmem182	transmembrane protein 182		18	91	Ptprf	protein tyrosine phosphatase, receptor type, F		18	91	Ptprf	protein tyrosine phosphatase, receptor type, F
40	96	Bzw1	basic leucine zipper and W2 domains 1		40	96	Bzw1	basic leucine zipper and W2 domains 1		40	96	Bzw1	basic leucine zipper and W2 domains 1		40	87	Mier1	mesoderm induction early response 1, transcriptional regulator		40	87	LOC688778	similar to fatty aldehyde dehydrogenase-like		40	82	Hdhd2	haloacid dehalogenase-like hydrolase domain containing 2		40	96	Bzw1	basic leucine zipper and W2 domains 1		40	96	Bzw1	basic leucine zipper and W2 domains 1		19	91	Cmpk1	cytidine monophosphate (UMP-CMP) kinase 1		19	91	Cmpk1	cytidine monophosphate (UMP-CMP) kinase 1
41	96	Luzp1	leucine zipper protein 1		41	96	Luzp1	leucine zipper protein 1		41	96	Luzp1	leucine zipper protein 1		41	87	Pianp	PILR alpha associated neural protein		41	87	Sp3	Sp3 transcription factor		41	82	LOC687465	hypothetical protein LOC687465		41	96	Luzp1	leucine zipper protein 1		41	96	Luzp1	leucine zipper protein 1		20	91	Cdh5	cadherin 5		20	91	Cdh5	cadherin 5
42	96	Rptor	regulatory associated protein of MTOR, complex 1		42	96	Rptor	regulatory associated protein of MTOR, complex 1		42	96	Rptor	regulatory associated protein of MTOR, complex 1		42	87	Kcnk1	potassium channel, subfamily K, member 1		42	87	Orc1	origin recognition complex, subunit 1		42	82	Ryr2	ryanodine receptor 2, cardiac		42	96	Rptor	regulatory associated protein of MTOR, complex 1		42	96	Rptor	regulatory associated protein of MTOR, complex 1		21	91	Rala	v-ral simian leukemia viral oncogene homolog A (ras related)		21	91	Rala	v-ral simian leukemia viral oncogene homolog A (ras related)
43	96	Osm	oncostatin M		43	96	Osm	oncostatin M		43	96	Osm	oncostatin M		43	87	Slamf1	signaling lymphocytic activation molecule family member 1		43	87	Ppp6c	protein phosphatase 6, catalytic subunit		43	82	Otud4	OTU domain containing 4		43	96	Osm	oncostatin M		43	96	Osm	oncostatin M		22	90	Unc5d	unc-5 homolog D (C. elegans)		22	90	Unc5d	unc-5 homolog D (C. elegans)
44	96	Orai2	ORAI calcium release-activated calcium modulator 2		44	96	Orai2	ORAI calcium release-activated calcium modulator 2		44	96	Orai2	ORAI calcium release-activated calcium modulator 2		44	86	Tvp23a	trans-golgi network vesicle protein 23 homolog A (S. cerevisiae)		44	87	Nkiras1	NFKB inhibitor interacting Ras-like 1		44	81	Sh3bgrl	SH3 domain binding glutamic acid-rich protein like		44	96	Orai2	ORAI calcium release-activated calcium modulator 2		44	96	Orai2	ORAI calcium release-activated calcium modulator 2		23	90	Ptprb	protein tyrosine phosphatase, receptor type, B		23	90	Ptprb	protein tyrosine phosphatase, receptor type, B
45	96	Kcnk10	potassium channel, subfamily K, member 10		45	96	Kcnk10	potassium channel, subfamily K, member 10		45	96	Kcnk10	potassium channel, subfamily K, member 10		45	86	RGD1565712	similar to Hypothetical protein MGC59495		45	87	Pura	purine rich element binding protein A		45	81	Dnajc21	DnaJ (Hsp40) homolog, subfamily C, member 21		45	96	Kcnk10	potassium channel, subfamily K, member 10		45	96	Kcnk10	potassium channel, subfamily K, member 10		24	90	LOC689437	similar to vitamin A-deficient testicular protein 11-like		24	90	LOC689437	similar to vitamin A-deficient testicular protein 11-like
46	96	Klhl18	kelch-like family member 18		46	96	Klhl18	kelch-like family member 18		46	96	Klhl18	kelch-like family member 18		46	86	S100vp	S100 calcium-binding protein, ventral prostate		46	86	Capza1	capping protein (actin filament) muscle Z-line, alpha 1		46	81	Cbfb	core-binding factor, beta subunit		46	96	Klhl18	kelch-like family member 18		46	96	Klhl18	kelch-like family member 18		25	90	Ccdc43	coiled-coil domain containing 43		25	90	Ccdc43	coiled-coil domain containing 43
47	96	Cdk19	cyclin-dependent kinase 19		47	96	Cdk19	cyclin-dependent kinase 19		47	96	Cdk19	cyclin-dependent kinase 19		47	86	RGD1304694	similar to CG9646-PA		47	86	Psmg4	proteasome (prosome, macropain) assembly chaperone 4		47	81	Bnip2	BCL2/adenovirus E1B interacting protein 2		47	96	Cdk19	cyclin-dependent kinase 19		47	96	Cdk19	cyclin-dependent kinase 19		26	89	Ccar1	cell division cycle and apoptosis regulator 1		26	89	Ccar1	cell division cycle and apoptosis regulator 1
48	96	Lmf1	lipase maturation factor 1		48	96	Lmf1	lipase maturation factor 1		48	96	Lmf1	lipase maturation factor 1		48	86	Kctd20	potassium channel tetramerization domain containing 20		48	86	Whsc1	Wolf-Hirschhorn syndrome candidate 1		48	81	Exoc3	exocyst complex component 3		48	96	Lmf1	lipase maturation factor 1		48	96	Lmf1	lipase maturation factor 1		27	89	Acnat2	acyl-coenzyme A amino acid N-acyltransferase 2		27	89	Acnat2	acyl-coenzyme A amino acid N-acyltransferase 2
49	96	Trabd2b	TraB domain containing 2B		49	96	Trabd2b	TraB domain containing 2B		49	96	Trabd2b	TraB domain containing 2B		49	85	Mamdc4	MAM domain containing 4		49	85	Tgfb2	transforming growth factor, beta 2		49	81	Hnrnpu	heterogeneous nuclear ribonucleoprotein U		49	96	Trabd2b	TraB domain containing 2B		49	96	Trabd2b	TraB domain containing 2B		28	88	Rab6a	RAB6A, member RAS oncogene family		28	88	Rab6a	RAB6A, member RAS oncogene family
50	96	Mier1	mesoderm induction early response 1, transcriptional regulator		50	96	Mier1	mesoderm induction early response 1, transcriptional regulator		50	96	Mier1	mesoderm induction early response 1, transcriptional regulator		50	85	Avl9	AVL9 homolog (S. cerevisiase)		50	85	Slc26a7	solute carrier family 26 (anion exchanger), member 7		50	80	R3hdm1	R3H domain containing 1		50	96	Mier1	mesoderm induction early response 1, transcriptional regulator		50	96	Mier1	mesoderm induction early response 1, transcriptional regulator		29	88	Slc5a7	solute carrier family 5 (sodium/choline cotransporter), member 7		29	88	Slc5a7	solute carrier family 5 (sodium/choline cotransporter), member 7
51	95	Slc9a8	solute carrier family 9, subfamily A (NHE8, cation proton antiporter 8), member 8		51	95	Slc9a8	solute carrier family 9, subfamily A (NHE8, cation proton antiporter 8), member 8		51	95	Slc9a8	solute carrier family 9, subfamily A (NHE8, cation proton antiporter 8), member 8		51	85	Tacr2	tachykinin receptor 2		51	84	Sh3rf3	SH3 domain containing ring finger 3		51	80	Pura	purine rich element binding protein A		51	95	Slc9a8	solute carrier family 9, subfamily A (NHE8, cation proton antiporter 8), member 8		51	95	Slc9a8	solute carrier family 9, subfamily A (NHE8, cation proton antiporter 8), member 8		30	87	Pmch	pro-melanin-concentrating hormone		30	87	Pmch	pro-melanin-concentrating hormone
52	95	S100vp	S100 calcium-binding protein, ventral prostate		52	95	S100vp	S100 calcium-binding protein, ventral prostate		52	95	S100vp	S100 calcium-binding protein, ventral prostate		52	84	Mrvi1	murine retrovirus integration site 1 homolog		52	84	Kat6a	K(lysine) acetyltransferase 6A		52	80	Gpr158	G protein-coupled receptor 158		52	95	S100vp	S100 calcium-binding protein, ventral prostate		52	95	S100vp	S100 calcium-binding protein, ventral prostate		31	87	Rock2	Rho-associated coiled-coil containing protein kinase 2		31	87	Rock2	Rho-associated coiled-coil containing protein kinase 2
53	95	Zfp710	zinc finger protein 710		53	95	Zfp710	zinc finger protein 710		53	95	Zfp710	zinc finger protein 710		53	84	Nhsl1	NHS-like 1		53	84	Slc12a6	solute carrier family 12, member 6		53	80	Gltscr1l	GLTSCR1-like		53	95	Zfp710	zinc finger protein 710		53	95	Zfp710	zinc finger protein 710		32	87	Rai1	retinoic acid induced 1		32	87	Rai1	retinoic acid induced 1
54	95	Mgrn1	mahogunin ring finger 1, E3 ubiquitin protein ligase		54	95	Mgrn1	mahogunin ring finger 1, E3 ubiquitin protein ligase		54	95	Mgrn1	mahogunin ring finger 1, E3 ubiquitin protein ligase		54	84	LOC102557522	pollen-specific leucine-rich repeat extensin-like protein 3-like		54	84	Man1a2	mannosidase, alpha, class 1A, member 2		1	92	Hspa5	heat shock protein 5		54	95	Mgrn1	mahogunin ring finger 1, E3 ubiquitin protein ligase		54	95	Mgrn1	mahogunin ring finger 1, E3 ubiquitin protein ligase		33	86	Bcl11a	B-cell CLL/lymphoma 11A (zinc finger protein)		33	86	Bcl11a	B-cell CLL/lymphoma 11A (zinc finger protein)
55	95	Dhdds	dehydrodolichyl diphosphate synthase		55	95	Dhdds	dehydrodolichyl diphosphate synthase		55	95	Dhdds	dehydrodolichyl diphosphate synthase		55	84	Adam12	ADAM metallopeptidase domain 12		55	84	Tor1b	torsin family 1, member B		2	88	Homer3	homer homolog 3 (Drosophila)		55	95	Dhdds	dehydrodolichyl diphosphate synthase		55	95	Dhdds	dehydrodolichyl diphosphate synthase		34	86	Fam196a	family with sequence similarity 196, member A		34	86	Fam196a	family with sequence similarity 196, member A
56	95	Efcab4b	EF-hand calcium binding domain 4B		56	95	Efcab4b	EF-hand calcium binding domain 4B		56	95	Efcab4b	EF-hand calcium binding domain 4B		56	84	Dhdds	dehydrodolichyl diphosphate synthase		56	83	Il11	interleukin 11		3	88	Tex26	testis expressed 26		56	95	Efcab4b	EF-hand calcium binding domain 4B		56	95	Efcab4b	EF-hand calcium binding domain 4B		35	85	Rad23b	RAD23 homolog B (S. cerevisiae)		35	85	Rad23b	RAD23 homolog B (S. cerevisiae)
57	95	Fars2	phenylalanyl-tRNA synthetase 2, mitochondrial		57	95	Fars2	phenylalanyl-tRNA synthetase 2, mitochondrial		57	95	Fars2	phenylalanyl-tRNA synthetase 2, mitochondrial		57	84	Lmf1	lipase maturation factor 1		57	83	Eif4a3	eukaryotic translation initiation factor 4A3		4	82	Pdgfb	platelet-derived growth factor beta polypeptide		57	95	Fars2	phenylalanyl-tRNA synthetase 2, mitochondrial		57	95	Fars2	phenylalanyl-tRNA synthetase 2, mitochondrial		36	85	Arpc1b	actin related protein 2/3 complex, subunit 1B		36	85	Arpc1b	actin related protein 2/3 complex, subunit 1B
58	95	Pklr	pyruvate kinase, liver and RBC		58	95	Pklr	pyruvate kinase, liver and RBC		58	95	Pklr	pyruvate kinase, liver and RBC		58	83	Xylt1	xylosyltransferase 1		58	83	Cgrrf1	cell growth regulator with ring finger domain 1		1	100	Tshz3	teashirt zinc finger homeobox 3		58	95	Pklr	pyruvate kinase, liver and RBC		58	95	Pklr	pyruvate kinase, liver and RBC		37	83	Hs2st1	heparan sulfate 2-O-sulfotransferase 1		37	83	Hs2st1	heparan sulfate 2-O-sulfotransferase 1
59	95	Slmo1	slowmo homolog 1 (Drosophila)		59	95	Slmo1	slowmo homolog 1 (Drosophila)		59	95	Slmo1	slowmo homolog 1 (Drosophila)		59	83	Tmx4	thioredoxin-related transmembrane protein 4		59	83	RGD1308601	similar to hypothetical protein		2	98	Fam46a	family with sequence similarity 46, member A		59	95	Slmo1	slowmo homolog 1 (Drosophila)		59	95	Slmo1	slowmo homolog 1 (Drosophila)		38	83	Fv1	Friend virus susceptibility 1		38	83	Fv1	Friend virus susceptibility 1
60	95	Nhsl1	NHS-like 1		60	95	Nhsl1	NHS-like 1		60	95	Nhsl1	NHS-like 1		60	83	Dync1li2	dynein, cytoplasmic 1 light intermediate chain 2		60	83	Thbs2	thrombospondin 2		3	98	Rapgef2	Rap guanine nucleotide exchange factor (GEF) 2		60	95	Nhsl1	NHS-like 1		60	95	Nhsl1	NHS-like 1		39	82	Arpc5	actin related protein 2/3 complex, subunit 5		39	82	Arpc5	actin related protein 2/3 complex, subunit 5
61	95	Tmem183a	transmembrane protein 183A		61	95	Tmem183a	transmembrane protein 183A		61	95	Tmem183a	transmembrane protein 183A		61	83	Ptpn7	protein tyrosine phosphatase, non-receptor type 7		61	82	Mesdc1	mesoderm development candidate 1		4	98	Zdhhc23	zinc finger, DHHC-type containing 23		61	95	Tmem183a	transmembrane protein 183A		61	95	Tmem183a	transmembrane protein 183A		40	82	Hdhd2	haloacid dehalogenase-like hydrolase domain containing 2		40	82	Hdhd2	haloacid dehalogenase-like hydrolase domain containing 2
62	95	Map2k1	mitogen activated protein kinase kinase 1		62	95	Map2k1	mitogen activated protein kinase kinase 1		62	95	Map2k1	mitogen activated protein kinase kinase 1		62	83	Dmbt1	deleted in malignant brain tumors 1		62	82	Erg	v-ets avian erythroblastosis virus E26 oncogene		5	98	Nfat5	nuclear factor of activated T-cells 5, tonicity-responsive		62	95	Map2k1	mitogen activated protein kinase kinase 1		62	95	Map2k1	mitogen activated protein kinase kinase 1		41	82	LOC687465	hypothetical protein LOC687465		41	82	LOC687465	hypothetical protein LOC687465
63	95	Hnrnpf	heterogeneous nuclear ribonucleoprotein F		63	95	Hnrnpf	heterogeneous nuclear ribonucleoprotein F		63	95	Hnrnpf	heterogeneous nuclear ribonucleoprotein F		63	83	LOC100911413	deleted in malignant brain tumors 1 protein-like		63	82	Fpgt	fucose-1-phosphate guanylyltransferase		6	98	Sbno1	strawberry notch homolog 1 (Drosophila)		63	95	Hnrnpf	heterogeneous nuclear ribonucleoprotein F		63	95	Hnrnpf	heterogeneous nuclear ribonucleoprotein F		42	82	Ryr2	ryanodine receptor 2, cardiac		42	82	Ryr2	ryanodine receptor 2, cardiac
64	95	Dstn	destrin		64	95	Dstn	destrin		64	95	Dstn	destrin		64	83	Zfp710	zinc finger protein 710		64	81	Zfp287	zinc finger protein 287		7	98	Gpr85	G protein-coupled receptor 85		64	95	Dstn	destrin		64	95	Dstn	destrin		43	82	Otud4	OTU domain containing 4		43	82	Otud4	OTU domain containing 4
65	94	Kctd20	potassium channel tetramerization domain containing 20		65	94	Kctd20	potassium channel tetramerization domain containing 20		65	94	Kctd20	potassium channel tetramerization domain containing 20		65	83	RGD1562234	similar to S100 calcium-binding protein, ventral prostate		65	81	Atp1b4	ATPase, (Na+)/K+ transporting, beta 4 polypeptide		8	98	Zfp513	zinc finger protein 513		65	94	Kctd20	potassium channel tetramerization domain containing 20		65	94	Kctd20	potassium channel tetramerization domain containing 20		44	81	Sh3bgrl	SH3 domain binding glutamic acid-rich protein like		44	81	Sh3bgrl	SH3 domain binding glutamic acid-rich protein like
66	94	Tnfaip1	tumor necrosis factor, alpha-induced protein 1 (endothelial)		66	94	Tnfaip1	tumor necrosis factor, alpha-induced protein 1 (endothelial)		66	94	Tnfaip1	tumor necrosis factor, alpha-induced protein 1 (endothelial)		66	83	Abca9	ATP-binding cassette, subfamily A (ABC1), member 9		66	81	Depdc1b	DEP domain containing 1B		9	97	Yy1	YY1 transcription factor		66	94	Tnfaip1	tumor necrosis factor, alpha-induced protein 1 (endothelial)		66	94	Tnfaip1	tumor necrosis factor, alpha-induced protein 1 (endothelial)		45	81	Dnajc21	DnaJ (Hsp40) homolog, subfamily C, member 21		45	81	Dnajc21	DnaJ (Hsp40) homolog, subfamily C, member 21
67	94	Dmbt1	deleted in malignant brain tumors 1		67	94	Dmbt1	deleted in malignant brain tumors 1		67	94	Dmbt1	deleted in malignant brain tumors 1		67	82	Map2k1	mitogen activated protein kinase kinase 1		67	81	Xrcc5	X-ray repair complementing defective repair in Chinese hamster cells 5		10	97	Tmem52b	transmembrane protein 52B		67	94	Dmbt1	deleted in malignant brain tumors 1		67	94	Dmbt1	deleted in malignant brain tumors 1		46	81	Cbfb	core-binding factor, beta subunit		46	81	Cbfb	core-binding factor, beta subunit
68	94	LOC100911413	deleted in malignant brain tumors 1 protein-like		68	94	LOC100911413	deleted in malignant brain tumors 1 protein-like		68	94	LOC100911413	deleted in malignant brain tumors 1 protein-like		68	82	Tnfaip1	tumor necrosis factor, alpha-induced protein 1 (endothelial)		68	81	Pnrc1	proline-rich nuclear receptor coactivator 1		11	97	Nucks1	nuclear casein kinase and cyclin-dependent kinase substrate 1		68	94	LOC100911413	deleted in malignant brain tumors 1 protein-like		68	94	LOC100911413	deleted in malignant brain tumors 1 protein-like		47	81	Bnip2	BCL2/adenovirus E1B interacting protein 2		47	81	Bnip2	BCL2/adenovirus E1B interacting protein 2
69	94	RGD1562234	similar to S100 calcium-binding protein, ventral prostate		69	94	RGD1562234	similar to S100 calcium-binding protein, ventral prostate		69	94	RGD1562234	similar to S100 calcium-binding protein, ventral prostate		69	82	Ptcd1	pentatricopeptide repeat domain 1		69	81	Txlng	taxilin gamma		12	97	Prpf4b	pre-mRNA processing factor 4B		69	94	RGD1562234	similar to S100 calcium-binding protein, ventral prostate		69	94	RGD1562234	similar to S100 calcium-binding protein, ventral prostate		48	81	Exoc3	exocyst complex component 3		48	81	Exoc3	exocyst complex component 3
70	94	LOC102557522	pollen-specific leucine-rich repeat extensin-like protein 3-like		70	94	LOC102557522	pollen-specific leucine-rich repeat extensin-like protein 3-like		70	94	LOC102557522	pollen-specific leucine-rich repeat extensin-like protein 3-like		70	81	Gtlf3b	gene trap locus F3b		70	81	Adam22	ADAM metallopeptidase domain 22		13	96	Suclg2	succinate-CoA ligase, GDP-forming, beta subunit		70	94	LOC102557522	pollen-specific leucine-rich repeat extensin-like protein 3-like		70	94	LOC102557522	pollen-specific leucine-rich repeat extensin-like protein 3-like		49	81	Hnrnpu	heterogeneous nuclear ribonucleoprotein U		49	81	Hnrnpu	heterogeneous nuclear ribonucleoprotein U
71	94	Ehd4	EH-domain containing 4		71	94	Ehd4	EH-domain containing 4		71	94	Ehd4	EH-domain containing 4		71	81	Harbi1	harbinger transposase derived 1		71	80	Gtf2b	general transcription factor IIB		14	96	Mtdh	metadherin		71	94	Ehd4	EH-domain containing 4		71	94	Ehd4	EH-domain containing 4		50	80	R3hdm1	R3H domain containing 1		50	80	R3hdm1	R3H domain containing 1
72	94	Mrvi1	murine retrovirus integration site 1 homolog		72	94	Mrvi1	murine retrovirus integration site 1 homolog		72	94	Mrvi1	murine retrovirus integration site 1 homolog		72	81	Sorbs3	sorbin and SH3 domain containing 3		72	80	Avl9	AVL9 homolog (S. cerevisiase)		15	96	Nfatc3	nuclear factor of activated T-cells, cytoplasmic, calcineurin-dependent 3		72	94	Mrvi1	murine retrovirus integration site 1 homolog		72	94	Mrvi1	murine retrovirus integration site 1 homolog		51	80	Pura	purine rich element binding protein A		51	80	Pura	purine rich element binding protein A
73	94	Slc43a2	solute carrier family 43 (amino acid system L transporter), member 2		73	94	Slc43a2	solute carrier family 43 (amino acid system L transporter), member 2		73	94	Slc43a2	solute carrier family 43 (amino acid system L transporter), member 2		73	81	LOC102552271	uncharacterized LOC102552271		1	99	Cpeb2	cytoplasmic polyadenylation element binding protein 2		16	95	Dpysl2	dihydropyrimidinase-like 2		73	94	Slc43a2	solute carrier family 43 (amino acid system L transporter), member 2		73	94	Slc43a2	solute carrier family 43 (amino acid system L transporter), member 2		52	80	Gpr158	G protein-coupled receptor 158		52	80	Gpr158	G protein-coupled receptor 158
74	94	Hic1	hypermethylated in cancer 1		74	94	Hic1	hypermethylated in cancer 1		74	94	Hic1	hypermethylated in cancer 1		74	81	LOC102556744	uncharacterized LOC102556744		2	99	Terf1	telomeric repeat binding factor (NIMA-interacting) 1		17	95	Kbtbd8	kelch repeat and BTB (POZ) domain containing 8		74	94	Hic1	hypermethylated in cancer 1		74	94	Hic1	hypermethylated in cancer 1		53	80	Gltscr1l	GLTSCR1-like		53	80	Gltscr1l	GLTSCR1-like
75	94	Ptcd1	pentatricopeptide repeat domain 1		75	94	Ptcd1	pentatricopeptide repeat domain 1		75	94	Ptcd1	pentatricopeptide repeat domain 1		75	81	Ppp1r12c	protein phosphatase 1, regulatory subunit 12C		3	99	St18	suppression of tumorigenicity 18		18	95	Ide	insulin degrading enzyme		75	94	Ptcd1	pentatricopeptide repeat domain 1		75	94	Ptcd1	pentatricopeptide repeat domain 1		1	92	Hspa5	heat shock protein 5		1	92	Hspa5	heat shock protein 5
76	94	Xylt1	xylosyltransferase 1		76	94	Xylt1	xylosyltransferase 1		76	94	Xylt1	xylosyltransferase 1		76	80	Txndc17	thioredoxin domain containing 17		4	97	Grk5	G protein-coupled receptor kinase 5		19	95	RGD1309079	similar to Ab2-095		76	94	Xylt1	xylosyltransferase 1		76	94	Xylt1	xylosyltransferase 1		2	88	Homer3	homer homolog 3 (Drosophila)		2	88	Homer3	homer homolog 3 (Drosophila)
77	94	Ptpdc1	protein tyrosine phosphatase domain containing 1		77	94	Ptpdc1	protein tyrosine phosphatase domain containing 1		77	94	Ptpdc1	protein tyrosine phosphatase domain containing 1		77	80	Slc35e2b	solute carrier family 35, member E2B		5	97	Akap10	A kinase (PRKA) anchor protein 10		20	95	Gpcpd1	glycerophosphocholine phosphodiesterase GDE1 homolog (S. cerevisiae)		77	94	Ptpdc1	protein tyrosine phosphatase domain containing 1		77	94	Ptpdc1	protein tyrosine phosphatase domain containing 1		3	88	Tex26	testis expressed 26		3	88	Tex26	testis expressed 26
78	94	Dync1li2	dynein, cytoplasmic 1 light intermediate chain 2		78	94	Dync1li2	dynein, cytoplasmic 1 light intermediate chain 2		78	94	Dync1li2	dynein, cytoplasmic 1 light intermediate chain 2		78	80	Hic1	hypermethylated in cancer 1		6	97	Zfp770	zinc finger protein 770		21	95	Ier5	immediate early response 5		78	94	Dync1li2	dynein, cytoplasmic 1 light intermediate chain 2		78	94	Dync1li2	dynein, cytoplasmic 1 light intermediate chain 2		4	82	Pdgfb	platelet-derived growth factor beta polypeptide		4	82	Pdgfb	platelet-derived growth factor beta polypeptide
79	94	Txndc17	thioredoxin domain containing 17		79	94	Txndc17	thioredoxin domain containing 17		79	94	Txndc17	thioredoxin domain containing 17		79	80	Dstn	destrin		7	97	Snca	synuclein, alpha (non A4 component of amyloid precursor)		22	95	Med13	mediator complex subunit 13		79	94	Txndc17	thioredoxin domain containing 17		79	94	Txndc17	thioredoxin domain containing 17		1	100	Tshz3	teashirt zinc finger homeobox 3		1	92	Hspa5	heat shock protein 5
80	94	Cic	capicua transcriptional repressor		80	94	Cic	capicua transcriptional repressor		80	94	Cic	capicua transcriptional repressor		1	97	Bcor	BCL6 co-repressor		8	97	Slc4a7	solute carrier family 4, sodium bicarbonate cotransporter, member 7		23	94	Pura	purine rich element binding protein A		80	94	Cic	capicua transcriptional repressor		80	94	Cic	capicua transcriptional repressor		2	98	Fam46a	family with sequence similarity 46, member A		2	88	Homer3	homer homolog 3 (Drosophila)
81	93	Antxr1	anthrax toxin receptor 1		81	93	Antxr1	anthrax toxin receptor 1		81	93	Antxr1	anthrax toxin receptor 1		2	96	Slitrk1	SLIT and NTRK-like family, member 1		9	97	Ric3	RIC3 acetylcholine receptor chaperone		24	94	Lats1	large tumor suppressor kinase 1		81	93	Antxr1	anthrax toxin receptor 1		81	93	Antxr1	anthrax toxin receptor 1		3	98	Rapgef2	Rap guanine nucleotide exchange factor (GEF) 2		3	88	Tex26	testis expressed 26
82	93	Ppp1r12c	protein phosphatase 1, regulatory subunit 12C		82	93	Ppp1r12c	protein phosphatase 1, regulatory subunit 12C		82	93	Ppp1r12c	protein phosphatase 1, regulatory subunit 12C		3	94	Egfl6	EGF-like-domain, multiple 6		10	96	Nfya	nuclear transcription factor-Y alpha		25	93	Timm44	translocase of inner mitochondrial membrane 44 homolog (yeast)		82	93	Ppp1r12c	protein phosphatase 1, regulatory subunit 12C		82	93	Ppp1r12c	protein phosphatase 1, regulatory subunit 12C		4	98	Zdhhc23	zinc finger, DHHC-type containing 23		4	82	Pdgfb	platelet-derived growth factor beta polypeptide
83	93	Clock	clock circadian regulator		83	93	Clock	clock circadian regulator		83	93	Clock	clock circadian regulator		4	93	Phip	pleckstrin homology domain interacting protein		11	95	Sgpp1	sphingosine-1-phosphate phosphatase 1		26	93	Ezh1	enhancer of zeste homolog 1 (Drosophila)		83	93	Clock	clock circadian regulator		83	93	Clock	clock circadian regulator		5	98	Nfat5	nuclear factor of activated T-cells 5, tonicity-responsive		1	100	Tshz3	teashirt zinc finger homeobox 3
84	93	Chst2	carbohydrate (N-acetylglucosamine-6-O) sulfotransferase 2		84	93	Chst2	carbohydrate (N-acetylglucosamine-6-O) sulfotransferase 2		84	93	Chst2	carbohydrate (N-acetylglucosamine-6-O) sulfotransferase 2		5	92	Pcdh9	protocadherin 9		12	94	Gabrb2	gamma-aminobutyric acid (GABA) A receptor, beta 2		27	93	Gabrg2	gamma-aminobutyric acid (GABA) A receptor, gamma 2		84	93	Chst2	carbohydrate (N-acetylglucosamine-6-O) sulfotransferase 2		84	93	Chst2	carbohydrate (N-acetylglucosamine-6-O) sulfotransferase 2		6	98	Sbno1	strawberry notch homolog 1 (Drosophila)		2	98	Fam46a	family with sequence similarity 46, member A
85	93	Osbpl3	oxysterol binding protein-like 3		85	93	Osbpl3	oxysterol binding protein-like 3		85	93	Osbpl3	oxysterol binding protein-like 3		6	91	Cd53	Cd53 molecule		13	94	Kctd13	potassium channel tetramerization domain containing 13		28	93	Cpeb4	cytoplasmic polyadenylation element binding protein 4		85	93	Osbpl3	oxysterol binding protein-like 3		85	93	Osbpl3	oxysterol binding protein-like 3		7	98	Gpr85	G protein-coupled receptor 85		3	98	Rapgef2	Rap guanine nucleotide exchange factor (GEF) 2
86	93	Lrrc41	leucine rich repeat containing 41		86	93	Lrrc41	leucine rich repeat containing 41		86	93	Lrrc41	leucine rich repeat containing 41		7	88	Stac	SH3 and cysteine rich domain		14	94	Pdpk1	3-phosphoinositide dependent protein kinase-1		29	93	Zdhhc3	zinc finger, DHHC-type containing 3		86	93	Lrrc41	leucine rich repeat containing 41		86	93	Lrrc41	leucine rich repeat containing 41		8	98	Zfp513	zinc finger protein 513		4	98	Zdhhc23	zinc finger, DHHC-type containing 23
87	93	Flrt3	fibronectin leucine rich transmembrane protein 3		87	93	Flrt3	fibronectin leucine rich transmembrane protein 3		87	93	Flrt3	fibronectin leucine rich transmembrane protein 3		8	87	Elavl2	ELAV like neuron-specific RNA binding protein 2		15	93	Ndufaf4	NADH dehydrogenase (ubiquinone) complex I, assembly factor 4		30	93	Rngtt	RNA guanylyltransferase and 5'-phosphatase		87	93	Flrt3	fibronectin leucine rich transmembrane protein 3		87	93	Flrt3	fibronectin leucine rich transmembrane protein 3		9	97	Yy1	YY1 transcription factor		5	98	Nfat5	nuclear factor of activated T-cells 5, tonicity-responsive
88	93	Colgalt1	collagen beta(1-O)galactosyltransferase 1		88	93	Colgalt1	collagen beta(1-O)galactosyltransferase 1		88	93	Colgalt1	collagen beta(1-O)galactosyltransferase 1		9	87	Klhl28	kelch-like family member 28		16	93	Dpys	dihydropyrimidinase		31	93	Kcnh7	potassium voltage-gated channel, subfamily H (eag-related), member 7		88	93	Colgalt1	collagen beta(1-O)galactosyltransferase 1		88	93	Colgalt1	collagen beta(1-O)galactosyltransferase 1		10	97	Tmem52b	transmembrane protein 52B		6	98	Sbno1	strawberry notch homolog 1 (Drosophila)
89	93	Tacr2	tachykinin receptor 2		89	93	Tacr2	tachykinin receptor 2		89	93	Tacr2	tachykinin receptor 2		10	86	Fam134c	family with sequence similarity 134, member C		17	92	RGD1309748	similar to CG4768-PA		32	92	Vamp4	vesicle-associated membrane protein 4		89	93	Tacr2	tachykinin receptor 2		89	93	Tacr2	tachykinin receptor 2		11	97	Nucks1	nuclear casein kinase and cyclin-dependent kinase substrate 1		7	98	Gpr85	G protein-coupled receptor 85
90	93	RGD1565712	similar to Hypothetical protein MGC59495		90	93	RGD1565712	similar to Hypothetical protein MGC59495		90	93	RGD1565712	similar to Hypothetical protein MGC59495		11	85	Col4a5	collagen, type IV, alpha 5		18	91	Ptprf	protein tyrosine phosphatase, receptor type, F		33	92	Epha7	Eph receptor A7		90	93	RGD1565712	similar to Hypothetical protein MGC59495		90	93	RGD1565712	similar to Hypothetical protein MGC59495		12	97	Prpf4b	pre-mRNA processing factor 4B		8	98	Zfp513	zinc finger protein 513
91	93	Adam12	ADAM metallopeptidase domain 12		91	93	Adam12	ADAM metallopeptidase domain 12		91	93	Adam12	ADAM metallopeptidase domain 12		12	84	Cbx5	chromobox homolog 5		19	91	Cmpk1	cytidine monophosphate (UMP-CMP) kinase 1		34	92	Vgll4	vestigial like 4 (Drosophila)		91	93	Adam12	ADAM metallopeptidase domain 12		91	93	Adam12	ADAM metallopeptidase domain 12		13	96	Suclg2	succinate-CoA ligase, GDP-forming, beta subunit		9	97	Yy1	YY1 transcription factor
92	93	Ccna1	cyclin A1		92	93	Ccna1	cyclin A1		92	93	Ccna1	cyclin A1		13	84	Synj1	synaptojanin 1		20	91	Cdh5	cadherin 5		35	92	Sirt7	sirtuin 7		92	93	Ccna1	cyclin A1		92	93	Ccna1	cyclin A1		14	96	Mtdh	metadherin		10	97	Tmem52b	transmembrane protein 52B
93	93	Npy5r	neuropeptide Y receptor Y5		93	93	Npy5r	neuropeptide Y receptor Y5		93	93	Npy5r	neuropeptide Y receptor Y5		14	84	Peli2	pellino E3 ubiquitin protein ligase family member 2		21	91	Rala	v-ral simian leukemia viral oncogene homolog A (ras related)		36	91	Kctd6	potassium channel tetramerization domain containing 6		93	93	Npy5r	neuropeptide Y receptor Y5		93	93	Npy5r	neuropeptide Y receptor Y5		15	96	Nfatc3	nuclear factor of activated T-cells, cytoplasmic, calcineurin-dependent 3		11	97	Nucks1	nuclear casein kinase and cyclin-dependent kinase substrate 1
94	92	Harbi1	harbinger transposase derived 1		94	92	Harbi1	harbinger transposase derived 1		94	92	Harbi1	harbinger transposase derived 1		15	82	Sptlc1	serine palmitoyltransferase, long chain base subunit 1		22	90	Unc5d	unc-5 homolog D (C. elegans)		37	91	LOC100909688	zinc finger protein 43-like		94	92	Harbi1	harbinger transposase derived 1		94	92	Harbi1	harbinger transposase derived 1		16	95	Dpysl2	dihydropyrimidinase-like 2		12	97	Prpf4b	pre-mRNA processing factor 4B
95	92	Mllt1	myeloid/lymphoid or mixed-lineage leukemia (trithorax homolog, Drosophila); translocated to, 1		95	92	Mllt1	myeloid/lymphoid or mixed-lineage leukemia (trithorax homolog, Drosophila); translocated to, 1		95	92	Mllt1	myeloid/lymphoid or mixed-lineage leukemia (trithorax homolog, Drosophila); translocated to, 1		16	82	RGD1562726	similar to Putative protein C21orf62 homolog		23	90	Ptprb	protein tyrosine phosphatase, receptor type, B		38	91	Capn6	calpain 6		95	92	Mllt1	myeloid/lymphoid or mixed-lineage leukemia (trithorax homolog, Drosophila); translocated to, 1		95	92	Mllt1	myeloid/lymphoid or mixed-lineage leukemia (trithorax homolog, Drosophila); translocated to, 1		17	95	Kbtbd8	kelch repeat and BTB (POZ) domain containing 8		13	96	Suclg2	succinate-CoA ligase, GDP-forming, beta subunit
96	92	Cbx7	chromobox homolog 7		96	92	Cbx7	chromobox homolog 7		96	92	Cbx7	chromobox homolog 7		17	81	Nyap2	neuronal tyrosine-phosphorylated phosphoinositide-3-kinase adaptor 2		24	90	LOC689437	similar to vitamin A-deficient testicular protein 11-like		39	91	Brinp3	bone morphogenetic protein/retinoic acid inducible neural-specific 3		96	92	Cbx7	chromobox homolog 7		96	92	Cbx7	chromobox homolog 7		18	95	Ide	insulin degrading enzyme		14	96	Mtdh	metadherin
97	92	Hmgn3	high mobility group nucleosomal binding domain 3		97	92	Hmgn3	high mobility group nucleosomal binding domain 3		97	92	Hmgn3	high mobility group nucleosomal binding domain 3		18	80	Ocrl	oculocerebrorenal syndrome of Lowe		25	90	Ccdc43	coiled-coil domain containing 43		40	91	Strn3	striatin, calmodulin binding protein 3		97	92	Hmgn3	high mobility group nucleosomal binding domain 3		97	92	Hmgn3	high mobility group nucleosomal binding domain 3		19	95	RGD1309079	similar to Ab2-095		15	96	Nfatc3	nuclear factor of activated T-cells, cytoplasmic, calcineurin-dependent 3
98	92	Mob1a	MOB kinase activator 1A		98	92	Mob1a	MOB kinase activator 1A		98	92	Mob1a	MOB kinase activator 1A		19	80	F2r	coagulation factor II (thrombin) receptor		26	89	Ccar1	cell division cycle and apoptosis regulator 1		41	90	Golga3	golgin A3		98	92	Mob1a	MOB kinase activator 1A		98	92	Mob1a	MOB kinase activator 1A		20	95	Gpcpd1	glycerophosphocholine phosphodiesterase GDE1 homolog (S. cerevisiae)		16	95	Dpysl2	dihydropyrimidinase-like 2
99	92	Zbtb5	zinc finger and BTB domain containing 5		99	92	Zbtb5	zinc finger and BTB domain containing 5		99	92	Zbtb5	zinc finger and BTB domain containing 5		20	80	Uba6	ubiquitin-like modifier activating enzyme 6		27	89	Acnat2	acyl-coenzyme A amino acid N-acyltransferase 2		42	90	Ube2d2	ubiquitin-conjugating enzyme E2D 2		99	92	Zbtb5	zinc finger and BTB domain containing 5		99	92	Zbtb5	zinc finger and BTB domain containing 5		21	95	Ier5	immediate early response 5		17	95	Kbtbd8	kelch repeat and BTB (POZ) domain containing 8
100	92	Brsk2	BR serine/threonine kinase 2		100	92	Brsk2	BR serine/threonine kinase 2		100	92	Brsk2	BR serine/threonine kinase 2		21	80	Zic3	Zic family member 3		28	88	Rab6a	RAB6A, member RAS oncogene family		43	90	Pum2	pumilio RNA-binding family member 2		100	92	Brsk2	BR serine/threonine kinase 2		100	92	Brsk2	BR serine/threonine kinase 2		22	95	Med13	mediator complex subunit 13		18	95	Ide	insulin degrading enzyme
101	92	Wiz	widely-interspaced zinc finger motifs		101	92	Wiz	widely-interspaced zinc finger motifs		101	92	Wiz	widely-interspaced zinc finger motifs		1	100	Zfp367	zinc finger protein 367		29	88	Slc5a7	solute carrier family 5 (sodium/choline cotransporter), member 7		44	89	Ugt2b1	UDP glucuronosyltransferase 2 family, polypeptide B1		101	92	Wiz	widely-interspaced zinc finger motifs		101	92	Wiz	widely-interspaced zinc finger motifs		23	94	Pura	purine rich element binding protein A		19	95	RGD1309079	similar to Ab2-095
102	92	Sparc	secreted protein, acidic, cysteine-rich (osteonectin)		102	92	Sparc	secreted protein, acidic, cysteine-rich (osteonectin)		102	92	Sparc	secreted protein, acidic, cysteine-rich (osteonectin)		2	99	Ppp3ca	protein phosphatase 3, catalytic subunit, alpha isozyme		30	87	Pmch	pro-melanin-concentrating hormone		45	89	Zfp148	zinc finger protein 148		102	92	Sparc	secreted protein, acidic, cysteine-rich (osteonectin)		102	92	Sparc	secreted protein, acidic, cysteine-rich (osteonectin)		24	94	Lats1	large tumor suppressor kinase 1		20	95	Gpcpd1	glycerophosphocholine phosphodiesterase GDE1 homolog (S. cerevisiae)
103	92	Pdgfra	platelet derived growth factor receptor, alpha polypeptide		103	92	Pdgfra	platelet derived growth factor receptor, alpha polypeptide		103	92	Pdgfra	platelet derived growth factor receptor, alpha polypeptide		3	99	Csmd3	CUB and Sushi multiple domains 3		31	87	Rock2	Rho-associated coiled-coil containing protein kinase 2		46	89	Ubxn2b	UBX domain protein 2B		103	92	Pdgfra	platelet derived growth factor receptor, alpha polypeptide		103	92	Pdgfra	platelet derived growth factor receptor, alpha polypeptide		25	93	Timm44	translocase of inner mitochondrial membrane 44 homolog (yeast)		21	95	Ier5	immediate early response 5
104	92	Capn15	calpain 15		104	92	Capn15	calpain 15		104	92	Capn15	calpain 15		4	99	Rnf34	ring finger protein 34, E3 ubiquitin protein ligase		32	87	Rai1	retinoic acid induced 1		47	88	Thbs2	thrombospondin 2		104	92	Capn15	calpain 15		104	92	Capn15	calpain 15		26	93	Ezh1	enhancer of zeste homolog 1 (Drosophila)		22	95	Med13	mediator complex subunit 13
105	92	Morc3	MORC family CW-type zinc finger 3		105	92	Morc3	MORC family CW-type zinc finger 3		105	92	Morc3	MORC family CW-type zinc finger 3		5	99	Pgm2l1	phosphoglucomutase 2-like 1		33	86	Bcl11a	B-cell CLL/lymphoma 11A (zinc finger protein)		48	88	Ppapdc1b	phosphatidic acid phosphatase type 2 domain containing 1B		105	92	Morc3	MORC family CW-type zinc finger 3		105	92	Morc3	MORC family CW-type zinc finger 3		27	93	Gabrg2	gamma-aminobutyric acid (GABA) A receptor, gamma 2		23	94	Pura	purine rich element binding protein A
106	91	Rbm19	RNA binding motif protein 19		106	91	Rbm19	RNA binding motif protein 19		106	91	Rbm19	RNA binding motif protein 19		6	99	Zbtb34	zinc finger and BTB domain containing 34		34	86	Fam196a	family with sequence similarity 196, member A		49	88	Ptpn4	protein tyrosine phosphatase, non-receptor type 4		106	91	Rbm19	RNA binding motif protein 19		106	91	Rbm19	RNA binding motif protein 19		28	93	Cpeb4	cytoplasmic polyadenylation element binding protein 4		24	94	Lats1	large tumor suppressor kinase 1
107	91	Zfp236	zinc finger protein 236		107	91	Zfp236	zinc finger protein 236		107	91	Zfp236	zinc finger protein 236		7	99	Ube2b	ubiquitin-conjugating enzyme E2B		35	85	Rad23b	RAD23 homolog B (S. cerevisiae)		50	88	Kmt2e	lysine (K)-specific methyltransferase 2E		107	91	Zfp236	zinc finger protein 236		107	91	Zfp236	zinc finger protein 236		29	93	Zdhhc3	zinc finger, DHHC-type containing 3		25	93	Timm44	translocase of inner mitochondrial membrane 44 homolog (yeast)
108	91	Abl1	c-abl oncogene 1, non-receptor tyrosine kinase		108	91	Abl1	c-abl oncogene 1, non-receptor tyrosine kinase		108	91	Abl1	c-abl oncogene 1, non-receptor tyrosine kinase		8	98	Fam46a	family with sequence similarity 46, member A		36	85	Arpc1b	actin related protein 2/3 complex, subunit 1B		51	88	Ccnj	cyclin J		108	91	Abl1	c-abl oncogene 1, non-receptor tyrosine kinase		108	91	Abl1	c-abl oncogene 1, non-receptor tyrosine kinase		30	93	Rngtt	RNA guanylyltransferase and 5'-phosphatase		26	93	Ezh1	enhancer of zeste homolog 1 (Drosophila)
109	91	Cpt1b	carnitine palmitoyltransferase 1b, muscle		109	91	Cpt1b	carnitine palmitoyltransferase 1b, muscle		109	91	Cpt1b	carnitine palmitoyltransferase 1b, muscle		9	98	Kbtbd8	kelch repeat and BTB (POZ) domain containing 8		37	83	Hs2st1	heparan sulfate 2-O-sulfotransferase 1		52	87	Prepl	prolyl endopeptidase-like		109	91	Cpt1b	carnitine palmitoyltransferase 1b, muscle		109	91	Cpt1b	carnitine palmitoyltransferase 1b, muscle		31	93	Kcnh7	potassium voltage-gated channel, subfamily H (eag-related), member 7		27	93	Gabrg2	gamma-aminobutyric acid (GABA) A receptor, gamma 2
110	91	Eps8l1	EPS8-like 1		110	91	Eps8l1	EPS8-like 1		110	91	Eps8l1	EPS8-like 1		10	98	Prpf40a	PRP40 pre-mRNA processing factor 40 homolog A (S. cerevisiae)		38	83	Fv1	Friend virus susceptibility 1		53	87	Slc2a13	solute carrier family 2 (facilitated glucose transporter), member 13		110	91	Eps8l1	EPS8-like 1		110	91	Eps8l1	EPS8-like 1		32	92	Vamp4	vesicle-associated membrane protein 4		28	93	Cpeb4	cytoplasmic polyadenylation element binding protein 4
111	91	Ippk	inositol 1,3,4,5,6-pentakisphosphate 2-kinase		111	91	Ippk	inositol 1,3,4,5,6-pentakisphosphate 2-kinase		111	91	Ippk	inositol 1,3,4,5,6-pentakisphosphate 2-kinase		11	98	Wdr1	WD repeat domain 1		39	82	Arpc5	actin related protein 2/3 complex, subunit 5		54	87	St7l	suppression of tumorigenicity 7-like		111	91	Ippk	inositol 1,3,4,5,6-pentakisphosphate 2-kinase		111	91	Ippk	inositol 1,3,4,5,6-pentakisphosphate 2-kinase		33	92	Epha7	Eph receptor A7		29	93	Zdhhc3	zinc finger, DHHC-type containing 3
112	91	Cd93	CD93 molecule		112	91	Cd93	CD93 molecule		112	91	Cd93	CD93 molecule		12	98	Traf6	TNF receptor-associated factor 6, E3 ubiquitin protein ligase		40	82	Hdhd2	haloacid dehalogenase-like hydrolase domain containing 2		55	87	Echdc1	enoyl CoA hydratase domain containing 1		112	91	Cd93	CD93 molecule		112	91	Cd93	CD93 molecule		34	92	Vgll4	vestigial like 4 (Drosophila)		30	93	Rngtt	RNA guanylyltransferase and 5'-phosphatase
113	91	Slc29a4	solute carrier family 29 (equilibrative nucleoside transporter), member 4		113	91	Slc29a4	solute carrier family 29 (equilibrative nucleoside transporter), member 4		113	91	Slc29a4	solute carrier family 29 (equilibrative nucleoside transporter), member 4		13	97	Slmap	sarcolemma associated protein		41	82	LOC687465	hypothetical protein LOC687465		56	86	Arhgap5	Rho GTPase activating protein 5		113	91	Slc29a4	solute carrier family 29 (equilibrative nucleoside transporter), member 4		113	91	Slc29a4	solute carrier family 29 (equilibrative nucleoside transporter), member 4		35	92	Sirt7	sirtuin 7		31	93	Kcnh7	potassium voltage-gated channel, subfamily H (eag-related), member 7
114	91	Hivep3	human immunodeficiency virus type I enhancer binding protein 3		114	91	Hivep3	human immunodeficiency virus type I enhancer binding protein 3		114	91	Hivep3	human immunodeficiency virus type I enhancer binding protein 3		14	96	Robo2	roundabout, axon guidance receptor, homolog 2 (Drosophila)		42	82	Ryr2	ryanodine receptor 2, cardiac		57	86	Bloc1s6	biogenesis of lysosomal organelles complex-1, subunit 6, pallidin		114	91	Hivep3	human immunodeficiency virus type I enhancer binding protein 3		114	91	Hivep3	human immunodeficiency virus type I enhancer binding protein 3		36	91	Kctd6	potassium channel tetramerization domain containing 6		32	92	Vamp4	vesicle-associated membrane protein 4
115	91	Camkk1	calcium/calmodulin-dependent protein kinase kinase 1, alpha		115	91	Camkk1	calcium/calmodulin-dependent protein kinase kinase 1, alpha		115	91	Camkk1	calcium/calmodulin-dependent protein kinase kinase 1, alpha		15	96	Cpeb4	cytoplasmic polyadenylation element binding protein 4		43	82	Otud4	OTU domain containing 4		58	86	Rb1cc1	RB1-inducible coiled-coil 1		115	91	Camkk1	calcium/calmodulin-dependent protein kinase kinase 1, alpha		115	91	Camkk1	calcium/calmodulin-dependent protein kinase kinase 1, alpha		37	91	LOC100909688	zinc finger protein 43-like		33	92	Epha7	Eph receptor A7
116	91	LOC100912563	insulinoma-associated protein 1-like		116	91	LOC100912563	insulinoma-associated protein 1-like		116	91	LOC100912563	insulinoma-associated protein 1-like		16	96	Zfp513	zinc finger protein 513		44	81	Sh3bgrl	SH3 domain binding glutamic acid-rich protein like		59	85	Edem3	ER degradation enhancer, mannosidase alpha-like 3		116	91	LOC100912563	insulinoma-associated protein 1-like		116	91	LOC100912563	insulinoma-associated protein 1-like		38	91	Capn6	calpain 6		34	92	Vgll4	vestigial like 4 (Drosophila)
117	91	Ccl21	chemokine (C-C motif) ligand 21		117	91	Ccl21	chemokine (C-C motif) ligand 21		117	91	Ccl21	chemokine (C-C motif) ligand 21		17	96	Gpcpd1	glycerophosphocholine phosphodiesterase GDE1 homolog (S. cerevisiae)		45	81	Dnajc21	DnaJ (Hsp40) homolog, subfamily C, member 21		60	85	LOC100909825	probable isocitrate dehydrogenase [NAD] gamma 2, mitochondrial-like		117	91	Ccl21	chemokine (C-C motif) ligand 21		117	91	Ccl21	chemokine (C-C motif) ligand 21		39	91	Brinp3	bone morphogenetic protein/retinoic acid inducible neural-specific 3		35	92	Sirt7	sirtuin 7
118	91	Slc9a1	solute carrier family 9, subfamily A (NHE1, cation proton antiporter 1), member 1		118	91	Slc9a1	solute carrier family 9, subfamily A (NHE1, cation proton antiporter 1), member 1		118	91	Slc9a1	solute carrier family 9, subfamily A (NHE1, cation proton antiporter 1), member 1		18	96	Ccnk	cyclin K		46	81	Cbfb	core-binding factor, beta subunit		61	85	Lrrc55	leucine rich repeat containing 55		118	91	Slc9a1	solute carrier family 9, subfamily A (NHE1, cation proton antiporter 1), member 1		118	91	Slc9a1	solute carrier family 9, subfamily A (NHE1, cation proton antiporter 1), member 1		40	91	Strn3	striatin, calmodulin binding protein 3		36	91	Kctd6	potassium channel tetramerization domain containing 6
119	91	Adamts12	ADAM metallopeptidase with thrombospondin type 1 motif, 12		119	91	Adamts12	ADAM metallopeptidase with thrombospondin type 1 motif, 12		119	91	Adamts12	ADAM metallopeptidase with thrombospondin type 1 motif, 12		19	96	Stim1	stromal interaction molecule 1		47	81	Bnip2	BCL2/adenovirus E1B interacting protein 2		62	85	Enc1	ectodermal-neural cortex 1		119	91	Adamts12	ADAM metallopeptidase with thrombospondin type 1 motif, 12		119	91	Adamts12	ADAM metallopeptidase with thrombospondin type 1 motif, 12		41	90	Golga3	golgin A3		37	91	LOC100909688	zinc finger protein 43-like
120	91	Srl	sarcalumenin		120	91	Srl	sarcalumenin		120	91	Srl	sarcalumenin		20	95	Mmd	monocyte to macrophage differentiation-associated		48	81	Exoc3	exocyst complex component 3		63	85	Fam84b	family with sequence similarity 84, member B		120	91	Srl	sarcalumenin		120	91	Srl	sarcalumenin		42	90	Ube2d2	ubiquitin-conjugating enzyme E2D 2		38	91	Capn6	calpain 6
121	91	Nipal2	NIPA-like domain containing 2		121	91	Nipal2	NIPA-like domain containing 2		121	91	Nipal2	NIPA-like domain containing 2		21	95	Rev3l	REV3-like, polymerase (DNA directed), zeta, catalytic subunit		49	81	Hnrnpu	heterogeneous nuclear ribonucleoprotein U		64	85	Cdan1	codanin 1		121	91	Nipal2	NIPA-like domain containing 2		121	91	Nipal2	NIPA-like domain containing 2		43	90	Pum2	pumilio RNA-binding family member 2		39	91	Brinp3	bone morphogenetic protein/retinoic acid inducible neural-specific 3
122	90	Atp10a	ATPase, class V, type 10A		122	90	Atp10a	ATPase, class V, type 10A		122	90	Atp10a	ATPase, class V, type 10A		22	95	Ddr2	discoidin domain receptor tyrosine kinase 2		50	80	R3hdm1	R3H domain containing 1		65	84	Dusp18	dual specificity phosphatase 18		122	90	Atp10a	ATPase, class V, type 10A		122	90	Atp10a	ATPase, class V, type 10A		44	89	Ugt2b1	UDP glucuronosyltransferase 2 family, polypeptide B1		40	91	Strn3	striatin, calmodulin binding protein 3
123	90	Tmem110	transmembrane protein 110		123	90	Tmem110	transmembrane protein 110		123	90	Tmem110	transmembrane protein 110		23	95	Scn1a	sodium channel, voltage-gated, type I, alpha		51	80	Pura	purine rich element binding protein A		66	84	Ca1	carbonic anhydrase I		123	90	Tmem110	transmembrane protein 110		123	90	Tmem110	transmembrane protein 110		45	89	Zfp148	zinc finger protein 148		41	90	Golga3	golgin A3
124	90	Lphn2	latrophilin 2		124	90	Lphn2	latrophilin 2		124	90	Lphn2	latrophilin 2		24	95	Jmjd1c	jumonji domain containing 1C		52	80	Gpr158	G protein-coupled receptor 158		67	84	Mtmr3	myotubularin related protein 3		124	90	Lphn2	latrophilin 2		124	90	Lphn2	latrophilin 2		46	89	Ubxn2b	UBX domain protein 2B		42	90	Ube2d2	ubiquitin-conjugating enzyme E2D 2
125	90	Srf	serum response factor (c-fos serum response element-binding transcription factor)		125	90	Srf	serum response factor (c-fos serum response element-binding transcription factor)		125	90	Srf	serum response factor (c-fos serum response element-binding transcription factor)		25	95	Upp2	uridine phosphorylase 2		53	80	Gltscr1l	GLTSCR1-like		68	84	LOC102551035	serine/arginine repetitive matrix protein 4-like		125	90	Srf	serum response factor (c-fos serum response element-binding transcription factor)		125	90	Srf	serum response factor (c-fos serum response element-binding transcription factor)		47	88	Thbs2	thrombospondin 2		43	90	Pum2	pumilio RNA-binding family member 2
126	90	Smg5	SMG5 nonsense mediated mRNA decay factor		126	90	Smg5	SMG5 nonsense mediated mRNA decay factor		126	90	Smg5	SMG5 nonsense mediated mRNA decay factor		26	95	Fndc3a	fibronectin type III domain containing 3a		1	92	Hspa5	heat shock protein 5		69	84	Ago1	argonaute RISC catalytic component 1		126	90	Smg5	SMG5 nonsense mediated mRNA decay factor		126	90	Smg5	SMG5 nonsense mediated mRNA decay factor		48	88	Ppapdc1b	phosphatidic acid phosphatase type 2 domain containing 1B		44	89	Ugt2b1	UDP glucuronosyltransferase 2 family, polypeptide B1
127	90	Mmd	monocyte to macrophage differentiation-associated		127	90	Mmd	monocyte to macrophage differentiation-associated		127	90	Mmd	monocyte to macrophage differentiation-associated		27	94	Tmem43	transmembrane protein 43		2	88	Homer3	homer homolog 3 (Drosophila)		70	84	Mmgt1	membrane magnesium transporter 1		127	90	Mmd	monocyte to macrophage differentiation-associated		127	90	Mmd	monocyte to macrophage differentiation-associated		49	88	Ptpn4	protein tyrosine phosphatase, non-receptor type 4		45	89	Zfp148	zinc finger protein 148
128	90	Kmt2c	lysine (K)-specific methyltransferase 2C		128	90	Kmt2c	lysine (K)-specific methyltransferase 2C		128	90	Kmt2c	lysine (K)-specific methyltransferase 2C		28	94	Crk	v-crk avian sarcoma virus CT10 oncogene homolog		3	88	Tex26	testis expressed 26		71	84	Rassf4	Ras association (RalGDS/AF-6) domain family member 4		128	90	Kmt2c	lysine (K)-specific methyltransferase 2C		128	90	Kmt2c	lysine (K)-specific methyltransferase 2C		50	88	Kmt2e	lysine (K)-specific methyltransferase 2E		46	89	Ubxn2b	UBX domain protein 2B
129	90	Ttc9	tetratricopeptide repeat domain 9		129	90	Ttc9	tetratricopeptide repeat domain 9		129	90	Ttc9	tetratricopeptide repeat domain 9		29	94	Ubxn2b	UBX domain protein 2B		4	82	Pdgfb	platelet-derived growth factor beta polypeptide		72	83	Arhgap42	Rho GTPase activating protein 42		129	90	Ttc9	tetratricopeptide repeat domain 9		129	90	Ttc9	tetratricopeptide repeat domain 9		51	88	Ccnj	cyclin J		47	88	Thbs2	thrombospondin 2
130	90	Slc35e2b	solute carrier family 35, member E2B		130	90	Slc35e2b	solute carrier family 35, member E2B		130	90	Slc35e2b	solute carrier family 35, member E2B		30	94	Insig1	insulin induced gene 1		1	100	Tshz3	teashirt zinc finger homeobox 3		73	83	Tc2n	tandem C2 domains, nuclear		130	90	Slc35e2b	solute carrier family 35, member E2B		130	90	Slc35e2b	solute carrier family 35, member E2B		52	87	Prepl	prolyl endopeptidase-like		48	88	Ppapdc1b	phosphatidic acid phosphatase type 2 domain containing 1B
131	90	Rock1	Rho-associated coiled-coil containing protein kinase 1		131	90	Rock1	Rho-associated coiled-coil containing protein kinase 1		131	90	Rock1	Rho-associated coiled-coil containing protein kinase 1		31	93	Fsd1l	fibronectin type III and SPRY domain containing 1-like		2	98	Fam46a	family with sequence similarity 46, member A		74	83	RGD1565058	similar to RIKEN cDNA 1700019M22		131	90	Rock1	Rho-associated coiled-coil containing protein kinase 1		131	90	Rock1	Rho-associated coiled-coil containing protein kinase 1		53	87	Slc2a13	solute carrier family 2 (facilitated glucose transporter), member 13		49	88	Ptpn4	protein tyrosine phosphatase, non-receptor type 4
132	90	Zbtb37	zinc finger and BTB domain containing 37		132	90	Zbtb37	zinc finger and BTB domain containing 37		132	90	Zbtb37	zinc finger and BTB domain containing 37		32	93	Asb3	ankyrin repeat and SOCS box-containing 3		3	98	Rapgef2	Rap guanine nucleotide exchange factor (GEF) 2		75	83	Cbfa2t2	core-binding factor, runt domain, alpha subunit 2; translocated to, 2		132	90	Zbtb37	zinc finger and BTB domain containing 37		132	90	Zbtb37	zinc finger and BTB domain containing 37		54	87	St7l	suppression of tumorigenicity 7-like		50	88	Kmt2e	lysine (K)-specific methyltransferase 2E
133	90	Tmcc1	transmembrane and coiled-coil domain family 1		133	90	Tmcc1	transmembrane and coiled-coil domain family 1		133	90	Tmcc1	transmembrane and coiled-coil domain family 1		33	93	Rassf4	Ras association (RalGDS/AF-6) domain family member 4		4	98	Zdhhc23	zinc finger, DHHC-type containing 23		76	83	Hsd11b2	hydroxysteroid 11-beta dehydrogenase 2		133	90	Tmcc1	transmembrane and coiled-coil domain family 1		133	90	Tmcc1	transmembrane and coiled-coil domain family 1		55	87	Echdc1	enoyl CoA hydratase domain containing 1		51	88	Ccnj	cyclin J
134	90	Irak1	interleukin-1 receptor-associated kinase 1		134	90	Irak1	interleukin-1 receptor-associated kinase 1		134	90	Irak1	interleukin-1 receptor-associated kinase 1		34	93	Far1	fatty acyl CoA reductase 1		5	98	Nfat5	nuclear factor of activated T-cells 5, tonicity-responsive		77	83	Robo2	roundabout, axon guidance receptor, homolog 2 (Drosophila)		134	90	Irak1	interleukin-1 receptor-associated kinase 1		134	90	Irak1	interleukin-1 receptor-associated kinase 1		56	86	Arhgap5	Rho GTPase activating protein 5		52	87	Prepl	prolyl endopeptidase-like
135	90	Efhd2	EF-hand domain family, member D2		135	90	Efhd2	EF-hand domain family, member D2		135	90	Efhd2	EF-hand domain family, member D2		35	93	Ccnj	cyclin J		6	98	Sbno1	strawberry notch homolog 1 (Drosophila)		78	83	Ncoa7	nuclear receptor coactivator 7		135	90	Efhd2	EF-hand domain family, member D2		135	90	Efhd2	EF-hand domain family, member D2		57	86	Bloc1s6	biogenesis of lysosomal organelles complex-1, subunit 6, pallidin		53	87	Slc2a13	solute carrier family 2 (facilitated glucose transporter), member 13
136	90	Ammecr1l	AMME chromosomal region gene 1-like		136	90	Ammecr1l	AMME chromosomal region gene 1-like		136	90	Ammecr1l	AMME chromosomal region gene 1-like		36	92	Abi1	abl-interactor 1		7	98	Gpr85	G protein-coupled receptor 85		79	83	LOC102546630	protein gar2-like		136	90	Ammecr1l	AMME chromosomal region gene 1-like		136	90	Ammecr1l	AMME chromosomal region gene 1-like		58	86	Rb1cc1	RB1-inducible coiled-coil 1		54	87	St7l	suppression of tumorigenicity 7-like
137	90	Spn	sialophorin		137	90	Spn	sialophorin		137	90	Spn	sialophorin		37	92	Sele	selectin E		8	98	Zfp513	zinc finger protein 513		80	83	LOC102557159	protein gar2-like		137	90	Spn	sialophorin		137	90	Spn	sialophorin		59	85	Edem3	ER degradation enhancer, mannosidase alpha-like 3		55	87	Echdc1	enoyl CoA hydratase domain containing 1
138	90	LOC100910272	signal recognition particle 72 kDa protein-like		138	90	LOC100910272	signal recognition particle 72 kDa protein-like		138	90	LOC100910272	signal recognition particle 72 kDa protein-like		38	92	Rapgef2	Rap guanine nucleotide exchange factor (GEF) 2		9	97	Yy1	YY1 transcription factor		81	82	Slc26a6	solute carrier family 26 (anion exchanger), member 6		138	90	LOC100910272	signal recognition particle 72 kDa protein-like		138	90	LOC100910272	signal recognition particle 72 kDa protein-like		60	85	LOC100909825	probable isocitrate dehydrogenase [NAD] gamma 2, mitochondrial-like		56	86	Arhgap5	Rho GTPase activating protein 5
139	90	Ndufa4l2	NADH dehydrogenase (ubiquinone) 1 alpha subcomplex, 4-like 2		139	90	Ndufa4l2	NADH dehydrogenase (ubiquinone) 1 alpha subcomplex, 4-like 2		139	90	Ndufa4l2	NADH dehydrogenase (ubiquinone) 1 alpha subcomplex, 4-like 2		39	92	Camsap2	calmodulin regulated spectrin-associated protein family, member 2		10	97	Tmem52b	transmembrane protein 52B		82	82	Rhoa	ras homolog family member A		139	90	Ndufa4l2	NADH dehydrogenase (ubiquinone) 1 alpha subcomplex, 4-like 2		139	90	Ndufa4l2	NADH dehydrogenase (ubiquinone) 1 alpha subcomplex, 4-like 2		61	85	Lrrc55	leucine rich repeat containing 55		57	86	Bloc1s6	biogenesis of lysosomal organelles complex-1, subunit 6, pallidin
140	90	Cyb5rl	cytochrome b5 reductase-like		140	90	Cyb5rl	cytochrome b5 reductase-like		140	90	Cyb5rl	cytochrome b5 reductase-like		40	91	RGD1560436	similar to hypothetical protein FLJ20508		11	97	Nucks1	nuclear casein kinase and cyclin-dependent kinase substrate 1		83	82	Arl13b	ADP-ribosylation factor-like 13B		140	90	Cyb5rl	cytochrome b5 reductase-like		140	90	Cyb5rl	cytochrome b5 reductase-like		62	85	Enc1	ectodermal-neural cortex 1		58	86	Rb1cc1	RB1-inducible coiled-coil 1
141	89	Adamtsl1	ADAMTS-like 1		141	89	Adamtsl1	ADAMTS-like 1		141	89	Adamtsl1	ADAMTS-like 1		41	91	Opa1	optic atrophy 1		12	97	Prpf4b	pre-mRNA processing factor 4B		84	82	Klhl32	kelch-like family member 32		141	89	Adamtsl1	ADAMTS-like 1		141	89	Adamtsl1	ADAMTS-like 1		63	85	Fam84b	family with sequence similarity 84, member B		59	85	Edem3	ER degradation enhancer, mannosidase alpha-like 3
142	89	Mtr	5-methyltetrahydrofolate-homocysteine methyltransferase		142	89	Mtr	5-methyltetrahydrofolate-homocysteine methyltransferase		142	89	Mtr	5-methyltetrahydrofolate-homocysteine methyltransferase		42	91	Golga3	golgin A3		13	96	Suclg2	succinate-CoA ligase, GDP-forming, beta subunit		85	82	Igf2bp1	insulin-like growth factor 2 mRNA binding protein 1		142	89	Mtr	5-methyltetrahydrofolate-homocysteine methyltransferase		142	89	Mtr	5-methyltetrahydrofolate-homocysteine methyltransferase		64	85	Cdan1	codanin 1		60	85	LOC100909825	probable isocitrate dehydrogenase [NAD] gamma 2, mitochondrial-like
143	89	Brd1	bromodomain containing 1		143	89	Brd1	bromodomain containing 1		143	89	Brd1	bromodomain containing 1		43	91	Pdpr	pyruvate dehydrogenase phosphatase regulatory subunit		14	96	Mtdh	metadherin		86	81	Epb41l1	erythrocyte membrane protein band 4.1-like 1		143	89	Brd1	bromodomain containing 1		143	89	Brd1	bromodomain containing 1		65	84	Dusp18	dual specificity phosphatase 18		61	85	Lrrc55	leucine rich repeat containing 55
144	89	LOC681426	similar to alpha-2u globulin PGCL4 isoform 1		144	89	LOC681426	similar to alpha-2u globulin PGCL4 isoform 1		144	89	LOC681426	similar to alpha-2u globulin PGCL4 isoform 1		44	91	Prpf4b	pre-mRNA processing factor 4B		15	96	Nfatc3	nuclear factor of activated T-cells, cytoplasmic, calcineurin-dependent 3		87	81	Herpud1	homocysteine-inducible, endoplasmic reticulum stress-inducible, ubiquitin-like domain member 1		144	89	LOC681426	similar to alpha-2u globulin PGCL4 isoform 1		144	89	LOC681426	similar to alpha-2u globulin PGCL4 isoform 1		66	84	Ca1	carbonic anhydrase I		62	85	Enc1	ectodermal-neural cortex 1
145	89	RGD1307461	similar to RIKEN cDNA 6430571L13 gene; similar to g20 protein		145	89	RGD1307461	similar to RIKEN cDNA 6430571L13 gene; similar to g20 protein		145	89	RGD1307461	similar to RIKEN cDNA 6430571L13 gene; similar to g20 protein		45	91	Hrasls	HRAS-like suppressor		16	95	Dpysl2	dihydropyrimidinase-like 2		88	81	Pip4k2b	phosphatidylinositol-5-phosphate 4-kinase, type II, beta		145	89	RGD1307461	similar to RIKEN cDNA 6430571L13 gene; similar to g20 protein		145	89	RGD1307461	similar to RIKEN cDNA 6430571L13 gene; similar to g20 protein		67	84	Mtmr3	myotubularin related protein 3		63	85	Fam84b	family with sequence similarity 84, member B
146	89	Ccdc97	coiled-coil domain containing 97		146	89	Ccdc97	coiled-coil domain containing 97		146	89	Ccdc97	coiled-coil domain containing 97		46	91	C8b	complement component 8, beta polypeptide		17	95	Kbtbd8	kelch repeat and BTB (POZ) domain containing 8		89	81	Btrc	beta-transducin repeat containing E3 ubiquitin protein ligase		146	89	Ccdc97	coiled-coil domain containing 97		146	89	Ccdc97	coiled-coil domain containing 97		68	84	LOC102551035	serine/arginine repetitive matrix protein 4-like		64	85	Cdan1	codanin 1
147	89	Bub1b	BUB1 mitotic checkpoint serine/threonine kinase B		147	89	Bub1b	BUB1 mitotic checkpoint serine/threonine kinase B		147	89	Bub1b	BUB1 mitotic checkpoint serine/threonine kinase B		47	91	Gnai3	guanine nucleotide binding protein (G protein), alpha inhibiting activity polypeptide 3		18	95	Ide	insulin degrading enzyme		90	81	Rap1b	RAP1B, member of RAS oncogene family		147	89	Bub1b	BUB1 mitotic checkpoint serine/threonine kinase B		147	89	Bub1b	BUB1 mitotic checkpoint serine/threonine kinase B		69	84	Ago1	argonaute RISC catalytic component 1		65	84	Dusp18	dual specificity phosphatase 18
148	89	Crtc1	CREB regulated transcription coactivator 1		148	89	Crtc1	CREB regulated transcription coactivator 1		148	89	Crtc1	CREB regulated transcription coactivator 1		48	90	Mypop	Myb-related transcription factor, partner of profilin		19	95	RGD1309079	similar to Ab2-095		91	81	Fa2h	fatty acid 2-hydroxylase		148	89	Crtc1	CREB regulated transcription coactivator 1		148	89	Crtc1	CREB regulated transcription coactivator 1		70	84	Mmgt1	membrane magnesium transporter 1		66	84	Ca1	carbonic anhydrase I
149	89	Mpped1	metallophosphoesterase domain containing 1		149	89	Mpped1	metallophosphoesterase domain containing 1		149	89	Mpped1	metallophosphoesterase domain containing 1		49	90	Nfat5	nuclear factor of activated T-cells 5, tonicity-responsive		20	95	Gpcpd1	glycerophosphocholine phosphodiesterase GDE1 homolog (S. cerevisiae)		92	81	Xpnpep2	X-prolyl aminopeptidase (aminopeptidase P) 2, membrane-bound		149	89	Mpped1	metallophosphoesterase domain containing 1		149	89	Mpped1	metallophosphoesterase domain containing 1		71	84	Rassf4	Ras association (RalGDS/AF-6) domain family member 4		67	84	Mtmr3	myotubularin related protein 3
150	89	Sec14l1	SEC14-like 1 (S. cerevisiae)		150	89	Sec14l1	SEC14-like 1 (S. cerevisiae)		150	89	Sec14l1	SEC14-like 1 (S. cerevisiae)		50	90	Pitpnc1	phosphatidylinositol transfer protein, cytoplasmic 1		21	95	Ier5	immediate early response 5		93	81	Ptbp3	polypyrimidine tract binding protein 3		150	89	Sec14l1	SEC14-like 1 (S. cerevisiae)		150	89	Sec14l1	SEC14-like 1 (S. cerevisiae)		72	83	Arhgap42	Rho GTPase activating protein 42		68	84	LOC102551035	serine/arginine repetitive matrix protein 4-like
151	89	Ube2z	ubiquitin-conjugating enzyme E2Z		151	89	Ube2z	ubiquitin-conjugating enzyme E2Z		151	89	Ube2z	ubiquitin-conjugating enzyme E2Z		51	90	Ppl	periplakin		22	95	Med13	mediator complex subunit 13		94	81	Emilin3	elastin microfibril interfacer 3		151	89	Ube2z	ubiquitin-conjugating enzyme E2Z		151	89	Ube2z	ubiquitin-conjugating enzyme E2Z		73	83	Tc2n	tandem C2 domains, nuclear		69	84	Ago1	argonaute RISC catalytic component 1
152	89	Srp72	signal recognition particle 72		152	89	Srp72	signal recognition particle 72		152	89	Srp72	signal recognition particle 72		52	89	Papolg	poly(A) polymerase gamma		23	94	Pura	purine rich element binding protein A		95	80	Fndc3a	fibronectin type III domain containing 3a		152	89	Srp72	signal recognition particle 72		152	89	Srp72	signal recognition particle 72		74	83	RGD1565058	similar to RIKEN cDNA 1700019M22		70	84	Mmgt1	membrane magnesium transporter 1
153	89	Map3k14	mitogen-activated protein kinase kinase kinase 14		153	89	Map3k14	mitogen-activated protein kinase kinase kinase 14		153	89	Map3k14	mitogen-activated protein kinase kinase kinase 14		53	89	Rab9b	RAB9B, member RAS oncogene family		24	94	Lats1	large tumor suppressor kinase 1		96	80	Pbrm1	polybromo 1		153	89	Map3k14	mitogen-activated protein kinase kinase kinase 14		153	89	Map3k14	mitogen-activated protein kinase kinase kinase 14		75	83	Cbfa2t2	core-binding factor, runt domain, alpha subunit 2; translocated to, 2		71	84	Rassf4	Ras association (RalGDS/AF-6) domain family member 4
154	89	Mlxip	MLX interacting protein		154	89	Mlxip	MLX interacting protein		154	89	Mlxip	MLX interacting protein		54	89	Aqp4	aquaporin 4		25	93	Timm44	translocase of inner mitochondrial membrane 44 homolog (yeast)		97	80	Eps15	epidermal growth factor receptor pathway substrate 15		154	89	Mlxip	MLX interacting protein		154	89	Mlxip	MLX interacting protein		76	83	Hsd11b2	hydroxysteroid 11-beta dehydrogenase 2		72	83	Arhgap42	Rho GTPase activating protein 42
155	89	Txnrd1	thioredoxin reductase 1		155	89	Txnrd1	thioredoxin reductase 1		155	89	Txnrd1	thioredoxin reductase 1		55	88	RGD1309079	similar to Ab2-095		26	93	Ezh1	enhancer of zeste homolog 1 (Drosophila)		98	80	Fktn	fukutin		155	89	Txnrd1	thioredoxin reductase 1		155	89	Txnrd1	thioredoxin reductase 1		77	83	Robo2	roundabout, axon guidance receptor, homolog 2 (Drosophila)		73	83	Tc2n	tandem C2 domains, nuclear
156	89	Tctn3	tectonic family member 3		156	89	Tctn3	tectonic family member 3		156	89	Tctn3	tectonic family member 3		56	88	Arih1	ariadne RBR E3 ubiquitin protein ligase 1		27	93	Gabrg2	gamma-aminobutyric acid (GABA) A receptor, gamma 2		99	80	Canx	calnexin		156	89	Tctn3	tectonic family member 3		156	89	Tctn3	tectonic family member 3		78	83	Ncoa7	nuclear receptor coactivator 7		74	83	RGD1565058	similar to RIKEN cDNA 1700019M22
157	89	LOC100912537	tectonic-3-like		157	89	LOC100912537	tectonic-3-like		157	89	LOC100912537	tectonic-3-like		57	88	Car13	carbonic anhydrase 13		28	93	Cpeb4	cytoplasmic polyadenylation element binding protein 4		100	80	Cbx7	chromobox homolog 7		157	89	LOC100912537	tectonic-3-like		157	89	LOC100912537	tectonic-3-like		79	83	LOC102546630	protein gar2-like		75	83	Cbfa2t2	core-binding factor, runt domain, alpha subunit 2; translocated to, 2
158	89	Nfat5	nuclear factor of activated T-cells 5, tonicity-responsive		158	89	Nfat5	nuclear factor of activated T-cells 5, tonicity-responsive		158	89	Nfat5	nuclear factor of activated T-cells 5, tonicity-responsive		58	88	Ssh2	slingshot protein phosphatase 2		29	93	Zdhhc3	zinc finger, DHHC-type containing 3		1	100	Tshz3	teashirt zinc finger homeobox 3		158	89	Nfat5	nuclear factor of activated T-cells 5, tonicity-responsive		158	89	Nfat5	nuclear factor of activated T-cells 5, tonicity-responsive		80	83	LOC102557159	protein gar2-like		76	83	Hsd11b2	hydroxysteroid 11-beta dehydrogenase 2
159	89	Chst11	carbohydrate (chondroitin 4) sulfotransferase 11		159	89	Chst11	carbohydrate (chondroitin 4) sulfotransferase 11		159	89	Chst11	carbohydrate (chondroitin 4) sulfotransferase 11		59	87	Capn6	calpain 6		30	93	Rngtt	RNA guanylyltransferase and 5'-phosphatase		2	98	Fam46a	family with sequence similarity 46, member A		159	89	Chst11	carbohydrate (chondroitin 4) sulfotransferase 11		159	89	Chst11	carbohydrate (chondroitin 4) sulfotransferase 11		81	82	Slc26a6	solute carrier family 26 (anion exchanger), member 6		77	83	Robo2	roundabout, axon guidance receptor, homolog 2 (Drosophila)
160	89	Ypel1	yippee-like 1 (Drosophila)		160	89	Ypel1	yippee-like 1 (Drosophila)		160	89	Ypel1	yippee-like 1 (Drosophila)		60	87	Thy1	Thy-1 cell surface antigen		31	93	Kcnh7	potassium voltage-gated channel, subfamily H (eag-related), member 7		3	98	Rapgef2	Rap guanine nucleotide exchange factor (GEF) 2		160	89	Ypel1	yippee-like 1 (Drosophila)		160	89	Ypel1	yippee-like 1 (Drosophila)		82	82	Rhoa	ras homolog family member A		78	83	Ncoa7	nuclear receptor coactivator 7
161	89	Limd1	LIM domains containing 1		161	89	Limd1	LIM domains containing 1		161	89	Limd1	LIM domains containing 1		61	86	Mex3b	mex-3 RNA binding family member B		32	92	Vamp4	vesicle-associated membrane protein 4		4	98	Zdhhc23	zinc finger, DHHC-type containing 23		161	89	Limd1	LIM domains containing 1		161	89	Limd1	LIM domains containing 1		83	82	Arl13b	ADP-ribosylation factor-like 13B		79	83	LOC102546630	protein gar2-like
162	88	Fam46a	family with sequence similarity 46, member A		162	88	Fam46a	family with sequence similarity 46, member A		162	88	Fam46a	family with sequence similarity 46, member A		62	86	Pum2	pumilio RNA-binding family member 2		33	92	Epha7	Eph receptor A7		5	98	Nfat5	nuclear factor of activated T-cells 5, tonicity-responsive		162	88	Fam46a	family with sequence similarity 46, member A		162	88	Fam46a	family with sequence similarity 46, member A		84	82	Klhl32	kelch-like family member 32		80	83	LOC102557159	protein gar2-like
163	88	Cdk6	cyclin-dependent kinase 6		163	88	Cdk6	cyclin-dependent kinase 6		163	88	Cdk6	cyclin-dependent kinase 6		63	86	Serp1	stress-associated endoplasmic reticulum protein 1		34	92	Vgll4	vestigial like 4 (Drosophila)		6	98	Sbno1	strawberry notch homolog 1 (Drosophila)		163	88	Cdk6	cyclin-dependent kinase 6		163	88	Cdk6	cyclin-dependent kinase 6		85	82	Igf2bp1	insulin-like growth factor 2 mRNA binding protein 1		81	82	Slc26a6	solute carrier family 26 (anion exchanger), member 6
164	88	Trpv6	transient receptor potential cation channel, subfamily V, member 6		164	88	Trpv6	transient receptor potential cation channel, subfamily V, member 6		164	88	Trpv6	transient receptor potential cation channel, subfamily V, member 6		64	86	Herc2	HECT and RLD domain containing E3 ubiquitin protein ligase 2		35	92	Sirt7	sirtuin 7		7	98	Gpr85	G protein-coupled receptor 85		164	88	Trpv6	transient receptor potential cation channel, subfamily V, member 6		164	88	Trpv6	transient receptor potential cation channel, subfamily V, member 6		86	81	Epb41l1	erythrocyte membrane protein band 4.1-like 1		82	82	Rhoa	ras homolog family member A
165	88	Bin3	bridging integrator 3		165	88	Bin3	bridging integrator 3		165	88	Bin3	bridging integrator 3		65	86	Zbtb11	zinc finger and BTB domain containing 11		36	91	Kctd6	potassium channel tetramerization domain containing 6		8	98	Zfp513	zinc finger protein 513		165	88	Bin3	bridging integrator 3		165	88	Bin3	bridging integrator 3		87	81	Herpud1	homocysteine-inducible, endoplasmic reticulum stress-inducible, ubiquitin-like domain member 1		83	82	Arl13b	ADP-ribosylation factor-like 13B
166	88	LOC102550903	ufm1-specific protease 1-like		166	88	LOC102550903	ufm1-specific protease 1-like		166	88	LOC102550903	ufm1-specific protease 1-like		66	85	Oxr1	oxidation resistance 1		37	91	LOC100909688	zinc finger protein 43-like		9	97	Yy1	YY1 transcription factor		166	88	LOC102550903	ufm1-specific protease 1-like		166	88	LOC102550903	ufm1-specific protease 1-like		88	81	Pip4k2b	phosphatidylinositol-5-phosphate 4-kinase, type II, beta		84	82	Klhl32	kelch-like family member 32
167	88	Rlbp1	retinaldehyde binding protein 1		167	88	Rlbp1	retinaldehyde binding protein 1		167	88	Rlbp1	retinaldehyde binding protein 1		67	85	Setd5	SET domain containing 5		38	91	Capn6	calpain 6		10	97	Tmem52b	transmembrane protein 52B		167	88	Rlbp1	retinaldehyde binding protein 1		167	88	Rlbp1	retinaldehyde binding protein 1		89	81	Btrc	beta-transducin repeat containing E3 ubiquitin protein ligase		85	82	Igf2bp1	insulin-like growth factor 2 mRNA binding protein 1
168	88	Cpd	carboxypeptidase D		168	88	Cpd	carboxypeptidase D		168	88	Cpd	carboxypeptidase D		68	85	Tcf7l2	transcription factor 7-like 2 (T-cell specific, HMG-box)		39	91	Brinp3	bone morphogenetic protein/retinoic acid inducible neural-specific 3		11	97	Nucks1	nuclear casein kinase and cyclin-dependent kinase substrate 1		168	88	Cpd	carboxypeptidase D		168	88	Cpd	carboxypeptidase D		90	81	Rap1b	RAP1B, member of RAS oncogene family		86	81	Epb41l1	erythrocyte membrane protein band 4.1-like 1
169	88	Shank2	SH3 and multiple ankyrin repeat domains 2		169	88	Shank2	SH3 and multiple ankyrin repeat domains 2		169	88	Shank2	SH3 and multiple ankyrin repeat domains 2		69	85	Ankrd29	ankyrin repeat domain 29		40	91	Strn3	striatin, calmodulin binding protein 3		12	97	Prpf4b	pre-mRNA processing factor 4B		169	88	Shank2	SH3 and multiple ankyrin repeat domains 2		169	88	Shank2	SH3 and multiple ankyrin repeat domains 2		91	81	Fa2h	fatty acid 2-hydroxylase		87	81	Herpud1	homocysteine-inducible, endoplasmic reticulum stress-inducible, ubiquitin-like domain member 1
170	88	LOC100911414	coiled-coil domain-containing protein 85A-like		170	88	LOC100911414	coiled-coil domain-containing protein 85A-like		170	88	LOC100911414	coiled-coil domain-containing protein 85A-like		70	85	Cdca2	cell division cycle associated 2		41	90	Golga3	golgin A3		13	96	Suclg2	succinate-CoA ligase, GDP-forming, beta subunit		170	88	LOC100911414	coiled-coil domain-containing protein 85A-like		170	88	LOC100911414	coiled-coil domain-containing protein 85A-like		92	81	Xpnpep2	X-prolyl aminopeptidase (aminopeptidase P) 2, membrane-bound		88	81	Pip4k2b	phosphatidylinositol-5-phosphate 4-kinase, type II, beta
171	88	Ube2g2	ubiquitin-conjugating enzyme E2G 2		171	88	Ube2g2	ubiquitin-conjugating enzyme E2G 2		171	88	Ube2g2	ubiquitin-conjugating enzyme E2G 2		71	85	Sgpp1	sphingosine-1-phosphate phosphatase 1		42	90	Ube2d2	ubiquitin-conjugating enzyme E2D 2		14	96	Mtdh	metadherin		171	88	Ube2g2	ubiquitin-conjugating enzyme E2G 2		171	88	Ube2g2	ubiquitin-conjugating enzyme E2G 2		93	81	Ptbp3	polypyrimidine tract binding protein 3		89	81	Btrc	beta-transducin repeat containing E3 ubiquitin protein ligase
172	88	Polr2a	polymerase (RNA) II (DNA directed) polypeptide A		172	88	Polr2a	polymerase (RNA) II (DNA directed) polypeptide A		172	88	Polr2a	polymerase (RNA) II (DNA directed) polypeptide A		72	85	Als2cl	ALS2 C-terminal like		43	90	Pum2	pumilio RNA-binding family member 2		15	96	Nfatc3	nuclear factor of activated T-cells, cytoplasmic, calcineurin-dependent 3		172	88	Polr2a	polymerase (RNA) II (DNA directed) polypeptide A		172	88	Polr2a	polymerase (RNA) II (DNA directed) polypeptide A		94	81	Emilin3	elastin microfibril interfacer 3		90	81	Rap1b	RAP1B, member of RAS oncogene family
173	88	Galnt2	UDP-N-acetyl-alpha-D-galactosamine:polypeptide N-acetylgalactosaminyltransferase 2 (GalNAc-T2)		173	88	Galnt2	UDP-N-acetyl-alpha-D-galactosamine:polypeptide N-acetylgalactosaminyltransferase 2 (GalNAc-T2)		173	88	Galnt2	UDP-N-acetyl-alpha-D-galactosamine:polypeptide N-acetylgalactosaminyltransferase 2 (GalNAc-T2)		73	84	Rassf5	Ras association (RalGDS/AF-6) domain family member 5		44	89	Ugt2b1	UDP glucuronosyltransferase 2 family, polypeptide B1		16	95	Dpysl2	dihydropyrimidinase-like 2		173	88	Galnt2	UDP-N-acetyl-alpha-D-galactosamine:polypeptide N-acetylgalactosaminyltransferase 2 (GalNAc-T2)		173	88	Galnt2	UDP-N-acetyl-alpha-D-galactosamine:polypeptide N-acetylgalactosaminyltransferase 2 (GalNAc-T2)		95	80	Fndc3a	fibronectin type III domain containing 3a		91	81	Fa2h	fatty acid 2-hydroxylase
174	88	Cnppd1	cyclin Pas1/PHO80 domain containing 1		174	88	Cnppd1	cyclin Pas1/PHO80 domain containing 1		174	88	Cnppd1	cyclin Pas1/PHO80 domain containing 1		74	84	Gpam	glycerol-3-phosphate acyltransferase, mitochondrial		45	89	Zfp148	zinc finger protein 148		17	95	Kbtbd8	kelch repeat and BTB (POZ) domain containing 8		174	88	Cnppd1	cyclin Pas1/PHO80 domain containing 1		174	88	Cnppd1	cyclin Pas1/PHO80 domain containing 1		96	80	Pbrm1	polybromo 1		92	81	Xpnpep2	X-prolyl aminopeptidase (aminopeptidase P) 2, membrane-bound
175	88	LOC100911734	exocyst complex component 7-like		175	88	LOC100911734	exocyst complex component 7-like		175	88	LOC100911734	exocyst complex component 7-like		75	84	LOC102556920	uncharacterized LOC102556920		46	89	Ubxn2b	UBX domain protein 2B		18	95	Ide	insulin degrading enzyme		175	88	LOC100911734	exocyst complex component 7-like		175	88	LOC100911734	exocyst complex component 7-like		97	80	Eps15	epidermal growth factor receptor pathway substrate 15		93	81	Ptbp3	polypyrimidine tract binding protein 3
176	88	Prrc1	proline-rich coiled-coil 1		176	88	Prrc1	proline-rich coiled-coil 1		176	88	Prrc1	proline-rich coiled-coil 1		76	84	Slc2a13	solute carrier family 2 (facilitated glucose transporter), member 13		47	88	Thbs2	thrombospondin 2		19	95	RGD1309079	similar to Ab2-095		176	88	Prrc1	proline-rich coiled-coil 1		176	88	Prrc1	proline-rich coiled-coil 1		98	80	Fktn	fukutin		94	81	Emilin3	elastin microfibril interfacer 3
177	88	Nsg2	neuron specific gene family member 2		177	88	Nsg2	neuron specific gene family member 2		177	88	Nsg2	neuron specific gene family member 2		77	84	Ptbp3	polypyrimidine tract binding protein 3		48	88	Ppapdc1b	phosphatidic acid phosphatase type 2 domain containing 1B		20	95	Gpcpd1	glycerophosphocholine phosphodiesterase GDE1 homolog (S. cerevisiae)		177	88	Nsg2	neuron specific gene family member 2		177	88	Nsg2	neuron specific gene family member 2		99	80	Canx	calnexin		95	80	Fndc3a	fibronectin type III domain containing 3a
178	88	Gtf3c2	general transcription factor IIIC, polypeptide 2, beta		178	88	Gtf3c2	general transcription factor IIIC, polypeptide 2, beta		178	88	Gtf3c2	general transcription factor IIIC, polypeptide 2, beta		78	83	Cdkn1c	cyclin-dependent kinase inhibitor 1C		49	88	Ptpn4	protein tyrosine phosphatase, non-receptor type 4		21	95	Ier5	immediate early response 5		178	88	Gtf3c2	general transcription factor IIIC, polypeptide 2, beta		178	88	Gtf3c2	general transcription factor IIIC, polypeptide 2, beta		100	80	Cbx7	chromobox homolog 7		96	80	Pbrm1	polybromo 1
179	88	Kcna2	potassium voltage-gated channel, shaker-related subfamily, member 2		179	88	Kcna2	potassium voltage-gated channel, shaker-related subfamily, member 2		179	88	Kcna2	potassium voltage-gated channel, shaker-related subfamily, member 2		79	83	Xpo4	exportin 4		50	88	Kmt2e	lysine (K)-specific methyltransferase 2E		22	95	Med13	mediator complex subunit 13		179	88	Kcna2	potassium voltage-gated channel, shaker-related subfamily, member 2		179	88	Kcna2	potassium voltage-gated channel, shaker-related subfamily, member 2		1	100	Nfkbiz	nuclear factor of kappa light polypeptide gene enhancer in B-cells inhibitor, zeta		97	80	Eps15	epidermal growth factor receptor pathway substrate 15
180	88	Stx1a	syntaxin 1A (brain)		180	88	Stx1a	syntaxin 1A (brain)		180	88	Stx1a	syntaxin 1A (brain)		80	82	Arhgap5	Rho GTPase activating protein 5		51	88	Ccnj	cyclin J		23	94	Pura	purine rich element binding protein A		180	88	Stx1a	syntaxin 1A (brain)		180	88	Stx1a	syntaxin 1A (brain)		2	97	Kpna3	karyopherin alpha 3		98	80	Fktn	fukutin
181	88	Pptc7	PTC7 protein phosphatase homolog (S. cerevisiae)		181	88	Pptc7	PTC7 protein phosphatase homolog (S. cerevisiae)		181	88	Pptc7	PTC7 protein phosphatase homolog (S. cerevisiae)		81	82	Stard4	StAR-related lipid transfer (START) domain containing 4		52	87	Prepl	prolyl endopeptidase-like		24	94	Lats1	large tumor suppressor kinase 1		181	88	Pptc7	PTC7 protein phosphatase homolog (S. cerevisiae)		181	88	Pptc7	PTC7 protein phosphatase homolog (S. cerevisiae)		3	95	Mbnl3	muscleblind-like splicing regulator 3		99	80	Canx	calnexin
182	87	Stard8	StAR-related lipid transfer (START) domain containing 8		182	87	Stard8	StAR-related lipid transfer (START) domain containing 8		182	87	Stard8	StAR-related lipid transfer (START) domain containing 8		82	82	Scn2a1	sodium channel, voltage-gated, type II, alpha 1		53	87	Slc2a13	solute carrier family 2 (facilitated glucose transporter), member 13		25	93	Timm44	translocase of inner mitochondrial membrane 44 homolog (yeast)		182	87	Stard8	StAR-related lipid transfer (START) domain containing 8		182	87	Stard8	StAR-related lipid transfer (START) domain containing 8		4	94	Smarce1	SWI/SNF related, matrix associated, actin dependent regulator of chromatin, subfamily e, member 1		100	80	Cbx7	chromobox homolog 7
183	87	Carm1	coactivator-associated arginine methyltransferase 1		183	87	Carm1	coactivator-associated arginine methyltransferase 1		183	87	Carm1	coactivator-associated arginine methyltransferase 1		83	82	Ubl3	ubiquitin-like 3		54	87	St7l	suppression of tumorigenicity 7-like		26	93	Ezh1	enhancer of zeste homolog 1 (Drosophila)		183	87	Carm1	coactivator-associated arginine methyltransferase 1		183	87	Carm1	coactivator-associated arginine methyltransferase 1		5	94	Hivep2	human immunodeficiency virus type I enhancer binding protein 2		1	100	Tshz3	teashirt zinc finger homeobox 3
184	87	RGD1304884	similar to RIKEN cDNA 6430548M08		184	87	RGD1304884	similar to RIKEN cDNA 6430548M08		184	87	RGD1304884	similar to RIKEN cDNA 6430548M08		84	82	Pan3	PAN3 polyA specific ribonuclease subunit homolog (S. cerevisiae)		55	87	Echdc1	enoyl CoA hydratase domain containing 1		27	93	Gabrg2	gamma-aminobutyric acid (GABA) A receptor, gamma 2		184	87	RGD1304884	similar to RIKEN cDNA 6430548M08		184	87	RGD1304884	similar to RIKEN cDNA 6430548M08		6	94	Rps6ka6	ribosomal protein S6 kinase polypeptide 6		2	98	Fam46a	family with sequence similarity 46, member A
185	87	Pcdh17	protocadherin 17		185	87	Pcdh17	protocadherin 17		185	87	Pcdh17	protocadherin 17		85	82	Nfkb1	nuclear factor of kappa light polypeptide gene enhancer in B-cells 1		56	86	Arhgap5	Rho GTPase activating protein 5		28	93	Cpeb4	cytoplasmic polyadenylation element binding protein 4		185	87	Pcdh17	protocadherin 17		185	87	Pcdh17	protocadherin 17		7	92	Trip4	thyroid hormone receptor interactor 4		3	98	Rapgef2	Rap guanine nucleotide exchange factor (GEF) 2
186	87	Ccdc150	coiled-coil domain containing 150		186	87	Ccdc150	coiled-coil domain containing 150		186	87	Ccdc150	coiled-coil domain containing 150		86	82	Slc10a3	solute carrier family 10, member 3		57	86	Bloc1s6	biogenesis of lysosomal organelles complex-1, subunit 6, pallidin		29	93	Zdhhc3	zinc finger, DHHC-type containing 3		186	87	Ccdc150	coiled-coil domain containing 150		186	87	Ccdc150	coiled-coil domain containing 150		8	89	Ranbp1	RAN binding protein 1		4	98	Zdhhc23	zinc finger, DHHC-type containing 23
187	87	Plekhm3	pleckstrin homology domain containing, family M, member 3		187	87	Plekhm3	pleckstrin homology domain containing, family M, member 3		187	87	Plekhm3	pleckstrin homology domain containing, family M, member 3		87	82	Gria3	glutamate receptor, ionotropic, AMPA 3		58	86	Rb1cc1	RB1-inducible coiled-coil 1		30	93	Rngtt	RNA guanylyltransferase and 5'-phosphatase		187	87	Plekhm3	pleckstrin homology domain containing, family M, member 3		187	87	Plekhm3	pleckstrin homology domain containing, family M, member 3		9	88	Hiat1	hippocampus abundant transcript 1		5	98	Nfat5	nuclear factor of activated T-cells 5, tonicity-responsive
188	87	Mllt6	myeloid/lymphoid or mixed-lineage leukemia (trithorax homolog, Drosophila); translocated to, 6		188	87	Mllt6	myeloid/lymphoid or mixed-lineage leukemia (trithorax homolog, Drosophila); translocated to, 6		188	87	Mllt6	myeloid/lymphoid or mixed-lineage leukemia (trithorax homolog, Drosophila); translocated to, 6		88	81	Rffl	ring finger and FYVE-like domain containing E3 ubiquitin protein ligase		59	85	Edem3	ER degradation enhancer, mannosidase alpha-like 3		31	93	Kcnh7	potassium voltage-gated channel, subfamily H (eag-related), member 7		188	87	Mllt6	myeloid/lymphoid or mixed-lineage leukemia (trithorax homolog, Drosophila); translocated to, 6		188	87	Mllt6	myeloid/lymphoid or mixed-lineage leukemia (trithorax homolog, Drosophila); translocated to, 6		10	88	Ctdspl2	CTD (carboxy-terminal domain, RNA polymerase II, polypeptide A) small phosphatase like 2		6	98	Sbno1	strawberry notch homolog 1 (Drosophila)
189	87	Vps13b	vacuolar protein sorting 13 homolog B (yeast)		189	87	Vps13b	vacuolar protein sorting 13 homolog B (yeast)		189	87	Vps13b	vacuolar protein sorting 13 homolog B (yeast)		89	81	Hivep3	human immunodeficiency virus type I enhancer binding protein 3		60	85	LOC100909825	probable isocitrate dehydrogenase [NAD] gamma 2, mitochondrial-like		32	92	Vamp4	vesicle-associated membrane protein 4		189	87	Vps13b	vacuolar protein sorting 13 homolog B (yeast)		189	87	Vps13b	vacuolar protein sorting 13 homolog B (yeast)		11	87	Naaa	N-acylethanolamine acid amidase		7	98	Gpr85	G protein-coupled receptor 85
190	87	Klhl6	kelch-like family member 6		190	87	Klhl6	kelch-like family member 6		190	87	Klhl6	kelch-like family member 6		90	81	Osbpl9	oxysterol binding protein-like 9		61	85	Lrrc55	leucine rich repeat containing 55		33	92	Epha7	Eph receptor A7		190	87	Klhl6	kelch-like family member 6		190	87	Klhl6	kelch-like family member 6		12	87	Yipf5	Yip1 domain family, member 5		8	98	Zfp513	zinc finger protein 513
191	87	Pianp	PILR alpha associated neural protein		191	87	Pianp	PILR alpha associated neural protein		191	87	Pianp	PILR alpha associated neural protein		91	81	Lipt2	lipoyl(octanoyl) transferase 2 (putative)		62	85	Enc1	ectodermal-neural cortex 1		34	92	Vgll4	vestigial like 4 (Drosophila)		191	87	Pianp	PILR alpha associated neural protein		191	87	Pianp	PILR alpha associated neural protein		13	87	Syncrip	synaptotagmin binding, cytoplasmic RNA interacting protein		9	97	Yy1	YY1 transcription factor
192	87	Nnt	nicotinamide nucleotide transhydrogenase		192	87	Nnt	nicotinamide nucleotide transhydrogenase		192	87	Nnt	nicotinamide nucleotide transhydrogenase		92	81	Inadl	InaD-like (Drosophila)		63	85	Fam84b	family with sequence similarity 84, member B		35	92	Sirt7	sirtuin 7		192	87	Nnt	nicotinamide nucleotide transhydrogenase		192	87	Nnt	nicotinamide nucleotide transhydrogenase		14	87	Hmgn2	high mobility group nucleosome binding domain 2		10	97	Tmem52b	transmembrane protein 52B
193	87	Gas7	growth arrest specific 7		193	87	Gas7	growth arrest specific 7		193	87	Gas7	growth arrest specific 7		93	81	RGD1310495	similar to KIAA1919 protein		64	85	Cdan1	codanin 1		36	91	Kctd6	potassium channel tetramerization domain containing 6		193	87	Gas7	growth arrest specific 7		193	87	Gas7	growth arrest specific 7		15	85	RGD1563325	similar to hypothetical protein MGC17943		11	97	Nucks1	nuclear casein kinase and cyclin-dependent kinase substrate 1
194	87	Slc24a2	solute carrier family 24 (sodium/potassium/calcium exchanger), member 2		194	87	Slc24a2	solute carrier family 24 (sodium/potassium/calcium exchanger), member 2		194	87	Slc24a2	solute carrier family 24 (sodium/potassium/calcium exchanger), member 2		94	81	LOC100909688	zinc finger protein 43-like		65	84	Dusp18	dual specificity phosphatase 18		37	91	LOC100909688	zinc finger protein 43-like		194	87	Slc24a2	solute carrier family 24 (sodium/potassium/calcium exchanger), member 2		194	87	Slc24a2	solute carrier family 24 (sodium/potassium/calcium exchanger), member 2		16	84	Ispd	isoprenoid synthase domain containing		12	97	Prpf4b	pre-mRNA processing factor 4B
195	87	Sat2	spermidine/spermine N1-acetyltransferase family member 2		195	87	Sat2	spermidine/spermine N1-acetyltransferase family member 2		195	87	Sat2	spermidine/spermine N1-acetyltransferase family member 2		95	81	Ddhd1	DDHD domain containing 1		66	84	Ca1	carbonic anhydrase I		38	91	Capn6	calpain 6		195	87	Sat2	spermidine/spermine N1-acetyltransferase family member 2		195	87	Sat2	spermidine/spermine N1-acetyltransferase family member 2		17	84	Ubn2	ubinuclein 2		13	96	Suclg2	succinate-CoA ligase, GDP-forming, beta subunit
196	86	RGD1566307	similar to PIRB1		196	86	RGD1566307	similar to PIRB1		196	86	RGD1566307	similar to PIRB1		96	81	Bcor	BCL6 co-repressor		67	84	Mtmr3	myotubularin related protein 3		39	91	Brinp3	bone morphogenetic protein/retinoic acid inducible neural-specific 3		196	86	RGD1566307	similar to PIRB1		196	86	RGD1566307	similar to PIRB1		18	83	Ccnc	cyclin C		14	96	Mtdh	metadherin
197	86	Grem2	gremlin 2		197	86	Grem2	gremlin 2		197	86	Grem2	gremlin 2		97	80	LOC100911615	patatin-like phospholipase domain-containing protein 2-like		68	84	LOC102551035	serine/arginine repetitive matrix protein 4-like		40	91	Strn3	striatin, calmodulin binding protein 3		197	86	Grem2	gremlin 2		197	86	Grem2	gremlin 2		19	83	Sybu	syntabulin (syntaxin-interacting)		15	96	Nfatc3	nuclear factor of activated T-cells, cytoplasmic, calcineurin-dependent 3
198	86	Mcl1	myeloid cell leukemia sequence 1		198	86	Mcl1	myeloid cell leukemia sequence 1		198	86	Mcl1	myeloid cell leukemia sequence 1		98	80	Aph1a	APH1A gamma secretase subunit		69	84	Ago1	argonaute RISC catalytic component 1		41	90	Golga3	golgin A3		198	86	Mcl1	myeloid cell leukemia sequence 1		198	86	Mcl1	myeloid cell leukemia sequence 1		20	81	Cul3	cullin 3		16	95	Dpysl2	dihydropyrimidinase-like 2
199	86	B3galt6	UDP-Gal:betaGal beta 1,3-galactosyltransferase, polypeptide 6		199	86	B3galt6	UDP-Gal:betaGal beta 1,3-galactosyltransferase, polypeptide 6		199	86	B3galt6	UDP-Gal:betaGal beta 1,3-galactosyltransferase, polypeptide 6		99	80	Pnpla2	patatin-like phospholipase domain containing 2		70	84	Mmgt1	membrane magnesium transporter 1		42	90	Ube2d2	ubiquitin-conjugating enzyme E2D 2		199	86	B3galt6	UDP-Gal:betaGal beta 1,3-galactosyltransferase, polypeptide 6		199	86	B3galt6	UDP-Gal:betaGal beta 1,3-galactosyltransferase, polypeptide 6		21	81	Rictor	RPTOR independent companion of MTOR, complex 2		17	95	Kbtbd8	kelch repeat and BTB (POZ) domain containing 8
200	86	Rbms3	RNA binding motif, single stranded interacting protein 3		200	86	Rbms3	RNA binding motif, single stranded interacting protein 3		200	86	Rbms3	RNA binding motif, single stranded interacting protein 3		100	80	2017-09-10	septin 10		71	84	Rassf4	Ras association (RalGDS/AF-6) domain family member 4		43	90	Pum2	pumilio RNA-binding family member 2		200	86	Rbms3	RNA binding motif, single stranded interacting protein 3		200	86	Rbms3	RNA binding motif, single stranded interacting protein 3		22	81	Ppp2r3a	protein phosphatase 2, regulatory subunit B'', alpha		18	95	Ide	insulin degrading enzyme
201	86	Pigzl1	phosphatidylinositol glycan, class Z-like 1		201	86	Pigzl1	phosphatidylinositol glycan, class Z-like 1		201	86	Pigzl1	phosphatidylinositol glycan, class Z-like 1		101	80	Fam102b	family with sequence similarity 102, member B		72	83	Arhgap42	Rho GTPase activating protein 42		44	89	Ugt2b1	UDP glucuronosyltransferase 2 family, polypeptide B1		201	86	Pigzl1	phosphatidylinositol glycan, class Z-like 1		201	86	Pigzl1	phosphatidylinositol glycan, class Z-like 1		23	80	Pou2f1	POU class 2 homeobox 1		19	95	RGD1309079	similar to Ab2-095
202	86	Sec11a	SEC11 homolog A (S. cerevisiae)		202	86	Sec11a	SEC11 homolog A (S. cerevisiae)		202	86	Sec11a	SEC11 homolog A (S. cerevisiae)		102	80	Tshz3	teashirt zinc finger homeobox 3		73	83	Tc2n	tandem C2 domains, nuclear		45	89	Zfp148	zinc finger protein 148		202	86	Sec11a	SEC11 homolog A (S. cerevisiae)		202	86	Sec11a	SEC11 homolog A (S. cerevisiae)		24	80	Clcn3	chloride channel, voltage-sensitive 3		20	95	Gpcpd1	glycerophosphocholine phosphodiesterase GDE1 homolog (S. cerevisiae)
203	86	LOC691551	similar to F28B3.5a		203	86	LOC691551	similar to F28B3.5a		203	86	LOC691551	similar to F28B3.5a		103	80	Epas1	endothelial PAS domain protein 1		74	83	RGD1565058	similar to RIKEN cDNA 1700019M22		46	89	Ubxn2b	UBX domain protein 2B		203	86	LOC691551	similar to F28B3.5a		203	86	LOC691551	similar to F28B3.5a		1	99	RGD1566359	similar to RIKEN cDNA B230219D22		21	95	Ier5	immediate early response 5
204	86	Cys1	cystin 1		204	86	Cys1	cystin 1		204	86	Cys1	cystin 1		1	100	Zfp367	zinc finger protein 367		75	83	Cbfa2t2	core-binding factor, runt domain, alpha subunit 2; translocated to, 2		47	88	Thbs2	thrombospondin 2		204	86	Cys1	cystin 1		204	86	Cys1	cystin 1		2	97	Kpna1	karyopherin alpha 1		22	95	Med13	mediator complex subunit 13
205	86	Rab21	RAB21, member RAS oncogene family		205	86	Rab21	RAB21, member RAS oncogene family		205	86	Rab21	RAB21, member RAS oncogene family		2	99	Ppp3ca	protein phosphatase 3, catalytic subunit, alpha isozyme		76	83	Hsd11b2	hydroxysteroid 11-beta dehydrogenase 2		48	88	Ppapdc1b	phosphatidic acid phosphatase type 2 domain containing 1B		205	86	Rab21	RAB21, member RAS oncogene family		205	86	Rab21	RAB21, member RAS oncogene family		3	96	Cpa4	carboxypeptidase A4		23	94	Pura	purine rich element binding protein A
206	86	Anks1a	ankyrin repeat and sterile alpha motif domain containing 1A		206	86	Anks1a	ankyrin repeat and sterile alpha motif domain containing 1A		206	86	Anks1a	ankyrin repeat and sterile alpha motif domain containing 1A		3	99	Csmd3	CUB and Sushi multiple domains 3		77	83	Robo2	roundabout, axon guidance receptor, homolog 2 (Drosophila)		49	88	Ptpn4	protein tyrosine phosphatase, non-receptor type 4		206	86	Anks1a	ankyrin repeat and sterile alpha motif domain containing 1A		206	86	Anks1a	ankyrin repeat and sterile alpha motif domain containing 1A		4	95	Bmper	BMP-binding endothelial regulator		24	94	Lats1	large tumor suppressor kinase 1
207	86	Ap2a2	adaptor-related protein complex 2, alpha 2 subunit		207	86	Ap2a2	adaptor-related protein complex 2, alpha 2 subunit		207	86	Ap2a2	adaptor-related protein complex 2, alpha 2 subunit		4	99	Rnf34	ring finger protein 34, E3 ubiquitin protein ligase		78	83	Ncoa7	nuclear receptor coactivator 7		50	88	Kmt2e	lysine (K)-specific methyltransferase 2E		207	86	Ap2a2	adaptor-related protein complex 2, alpha 2 subunit		207	86	Ap2a2	adaptor-related protein complex 2, alpha 2 subunit		5	95	Cers6	ceramide synthase 6		25	93	Timm44	translocase of inner mitochondrial membrane 44 homolog (yeast)
208	86	Fam177a1	family with sequence similarity 177, member A1		208	86	Fam177a1	family with sequence similarity 177, member A1		208	86	Fam177a1	family with sequence similarity 177, member A1		5	99	Pgm2l1	phosphoglucomutase 2-like 1		79	83	LOC102546630	protein gar2-like		51	88	Ccnj	cyclin J		208	86	Fam177a1	family with sequence similarity 177, member A1		208	86	Fam177a1	family with sequence similarity 177, member A1		6	95	Cisd2	CDGSH iron sulfur domain 2		26	93	Ezh1	enhancer of zeste homolog 1 (Drosophila)
209	85	Edar	ectodysplasin-A receptor		209	85	Edar	ectodysplasin-A receptor		209	85	Edar	ectodysplasin-A receptor		6	99	Zbtb34	zinc finger and BTB domain containing 34		80	83	LOC102557159	protein gar2-like		52	87	Prepl	prolyl endopeptidase-like		209	85	Edar	ectodysplasin-A receptor		209	85	Edar	ectodysplasin-A receptor		7	95	Ptprb	protein tyrosine phosphatase, receptor type, B		27	93	Gabrg2	gamma-aminobutyric acid (GABA) A receptor, gamma 2
210	85	Slc2a1	solute carrier family 2 (facilitated glucose transporter), member 1		210	85	Slc2a1	solute carrier family 2 (facilitated glucose transporter), member 1		210	85	Slc2a1	solute carrier family 2 (facilitated glucose transporter), member 1		7	99	Ube2b	ubiquitin-conjugating enzyme E2B		81	82	Slc26a6	solute carrier family 26 (anion exchanger), member 6		53	87	Slc2a13	solute carrier family 2 (facilitated glucose transporter), member 13		210	85	Slc2a1	solute carrier family 2 (facilitated glucose transporter), member 1		210	85	Slc2a1	solute carrier family 2 (facilitated glucose transporter), member 1		8	94	Gata3	GATA binding protein 3		28	93	Cpeb4	cytoplasmic polyadenylation element binding protein 4
211	85	Ppip5k1	diphosphoinositol pentakisphosphate kinase 1		211	85	Ppip5k1	diphosphoinositol pentakisphosphate kinase 1		211	85	Ppip5k1	diphosphoinositol pentakisphosphate kinase 1		8	98	Fam46a	family with sequence similarity 46, member A		82	82	Rhoa	ras homolog family member A		54	87	St7l	suppression of tumorigenicity 7-like		211	85	Ppip5k1	diphosphoinositol pentakisphosphate kinase 1		211	85	Ppip5k1	diphosphoinositol pentakisphosphate kinase 1		9	94	Foxn3	forkhead box N3		29	93	Zdhhc3	zinc finger, DHHC-type containing 3
212	85	Nrf1	nuclear respiratory factor 1		212	85	Nrf1	nuclear respiratory factor 1		212	85	Nrf1	nuclear respiratory factor 1		9	98	Kbtbd8	kelch repeat and BTB (POZ) domain containing 8		83	82	Arl13b	ADP-ribosylation factor-like 13B		55	87	Echdc1	enoyl CoA hydratase domain containing 1		212	85	Nrf1	nuclear respiratory factor 1		212	85	Nrf1	nuclear respiratory factor 1		10	94	Letm1	leucine zipper-EF-hand containing transmembrane protein 1		30	93	Rngtt	RNA guanylyltransferase and 5'-phosphatase
213	85	Zbtb43	zinc finger and BTB domain containing 43		213	85	Zbtb43	zinc finger and BTB domain containing 43		213	85	Zbtb43	zinc finger and BTB domain containing 43		10	98	Prpf40a	PRP40 pre-mRNA processing factor 40 homolog A (S. cerevisiae)		84	82	Klhl32	kelch-like family member 32		56	86	Arhgap5	Rho GTPase activating protein 5		213	85	Zbtb43	zinc finger and BTB domain containing 43		213	85	Zbtb43	zinc finger and BTB domain containing 43		11	93	Hs6st2	heparan sulfate 6-O-sulfotransferase 2		31	93	Kcnh7	potassium voltage-gated channel, subfamily H (eag-related), member 7
214	85	Kbtbd3	kelch repeat and BTB (POZ) domain containing 3		214	85	Kbtbd3	kelch repeat and BTB (POZ) domain containing 3		214	85	Kbtbd3	kelch repeat and BTB (POZ) domain containing 3		11	98	Wdr1	WD repeat domain 1		85	82	Igf2bp1	insulin-like growth factor 2 mRNA binding protein 1		57	86	Bloc1s6	biogenesis of lysosomal organelles complex-1, subunit 6, pallidin		214	85	Kbtbd3	kelch repeat and BTB (POZ) domain containing 3		214	85	Kbtbd3	kelch repeat and BTB (POZ) domain containing 3		12	92	Nova1	neuro-oncological ventral antigen 1		32	92	Vamp4	vesicle-associated membrane protein 4
215	85	Mamdc4	MAM domain containing 4		215	85	Mamdc4	MAM domain containing 4		215	85	Mamdc4	MAM domain containing 4		12	98	Traf6	TNF receptor-associated factor 6, E3 ubiquitin protein ligase		86	81	Epb41l1	erythrocyte membrane protein band 4.1-like 1		58	86	Rb1cc1	RB1-inducible coiled-coil 1		215	85	Mamdc4	MAM domain containing 4		215	85	Mamdc4	MAM domain containing 4		13	92	Frmd4b	FERM domain containing 4B		33	92	Epha7	Eph receptor A7
216	85	Macrod2	MACRO domain containing 2		216	85	Macrod2	MACRO domain containing 2		216	85	Macrod2	MACRO domain containing 2		13	97	Slmap	sarcolemma associated protein		87	81	Herpud1	homocysteine-inducible, endoplasmic reticulum stress-inducible, ubiquitin-like domain member 1		59	85	Edem3	ER degradation enhancer, mannosidase alpha-like 3		216	85	Macrod2	MACRO domain containing 2		216	85	Macrod2	MACRO domain containing 2		14	91	Tspan3	tetraspanin 3		34	92	Vgll4	vestigial like 4 (Drosophila)
217	85	Crem	cAMP responsive element modulator		217	85	Crem	cAMP responsive element modulator		217	85	Crem	cAMP responsive element modulator		14	96	Robo2	roundabout, axon guidance receptor, homolog 2 (Drosophila)		88	81	Pip4k2b	phosphatidylinositol-5-phosphate 4-kinase, type II, beta		60	85	LOC100909825	probable isocitrate dehydrogenase [NAD] gamma 2, mitochondrial-like		217	85	Crem	cAMP responsive element modulator		217	85	Crem	cAMP responsive element modulator		15	90	Tmem30a	transmembrane protein 30A		35	92	Sirt7	sirtuin 7
218	85	Col5a1	collagen, type V, alpha 1		218	85	Col5a1	collagen, type V, alpha 1		218	85	Col5a1	collagen, type V, alpha 1		15	96	Cpeb4	cytoplasmic polyadenylation element binding protein 4		89	81	Btrc	beta-transducin repeat containing E3 ubiquitin protein ligase		61	85	Lrrc55	leucine rich repeat containing 55		218	85	Col5a1	collagen, type V, alpha 1		218	85	Col5a1	collagen, type V, alpha 1		16	90	Actr6	ARP6 actin-related protein 6 homolog (yeast)		36	91	Kctd6	potassium channel tetramerization domain containing 6
219	85	Bcl2l11	BCL2-like 11 (apoptosis facilitator)		219	85	Bcl2l11	BCL2-like 11 (apoptosis facilitator)		219	85	Bcl2l11	BCL2-like 11 (apoptosis facilitator)		16	96	Zfp513	zinc finger protein 513		90	81	Rap1b	RAP1B, member of RAS oncogene family		62	85	Enc1	ectodermal-neural cortex 1		219	85	Bcl2l11	BCL2-like 11 (apoptosis facilitator)		219	85	Bcl2l11	BCL2-like 11 (apoptosis facilitator)		17	89	Nek9	NIMA-related kinase 9		37	91	LOC100909688	zinc finger protein 43-like
220	85	Zdhhc21	zinc finger, DHHC-type containing 21		220	85	Zdhhc21	zinc finger, DHHC-type containing 21		220	85	Zdhhc21	zinc finger, DHHC-type containing 21		17	96	Gpcpd1	glycerophosphocholine phosphodiesterase GDE1 homolog (S. cerevisiae)		91	81	Fa2h	fatty acid 2-hydroxylase		63	85	Fam84b	family with sequence similarity 84, member B		220	85	Zdhhc21	zinc finger, DHHC-type containing 21		220	85	Zdhhc21	zinc finger, DHHC-type containing 21		18	89	Cenpi	centromere protein I		38	91	Capn6	calpain 6
221	85	RGD1563510	similar to RIKEN cDNA 8430427H17 gene		221	85	RGD1563510	similar to RIKEN cDNA 8430427H17 gene		221	85	RGD1563510	similar to RIKEN cDNA 8430427H17 gene		18	96	Ccnk	cyclin K		92	81	Xpnpep2	X-prolyl aminopeptidase (aminopeptidase P) 2, membrane-bound		64	85	Cdan1	codanin 1		221	85	RGD1563510	similar to RIKEN cDNA 8430427H17 gene		221	85	RGD1563510	similar to RIKEN cDNA 8430427H17 gene		19	87	Ms4a4c	membrane-spanning 4-domains, subfamily A, member 4C		39	91	Brinp3	bone morphogenetic protein/retinoic acid inducible neural-specific 3
222	85	LOC100364984	rCG35079-like		222	85	LOC100364984	rCG35079-like		222	85	LOC100364984	rCG35079-like		19	96	Stim1	stromal interaction molecule 1		93	81	Ptbp3	polypyrimidine tract binding protein 3		65	84	Dusp18	dual specificity phosphatase 18		222	85	LOC100364984	rCG35079-like		222	85	LOC100364984	rCG35079-like		20	87	RGD1309747	similar to KIAA0947 protein		40	91	Strn3	striatin, calmodulin binding protein 3
223	85	Zfyve19	zinc finger, FYVE domain containing 19		223	85	Zfyve19	zinc finger, FYVE domain containing 19		223	85	Zfyve19	zinc finger, FYVE domain containing 19		20	95	Mmd	monocyte to macrophage differentiation-associated		94	81	Emilin3	elastin microfibril interfacer 3		66	84	Ca1	carbonic anhydrase I		223	85	Zfyve19	zinc finger, FYVE domain containing 19		223	85	Zfyve19	zinc finger, FYVE domain containing 19		21	86	Clec1a	C-type lectin domain family 1, member A		41	90	Golga3	golgin A3
224	85	Zfp512b	zinc finger protein 512B		224	85	Zfp512b	zinc finger protein 512B		224	85	Zfp512b	zinc finger protein 512B		21	95	Rev3l	REV3-like, polymerase (DNA directed), zeta, catalytic subunit		95	80	Fndc3a	fibronectin type III domain containing 3a		67	84	Mtmr3	myotubularin related protein 3		224	85	Zfp512b	zinc finger protein 512B		224	85	Zfp512b	zinc finger protein 512B		22	86	Mrpl35	mitochondrial ribosomal protein L35		42	90	Ube2d2	ubiquitin-conjugating enzyme E2D 2
225	84	Sv2a	synaptic vesicle glycoprotein 2a		225	84	Sv2a	synaptic vesicle glycoprotein 2a		225	84	Sv2a	synaptic vesicle glycoprotein 2a		22	95	Ddr2	discoidin domain receptor tyrosine kinase 2		96	80	Pbrm1	polybromo 1		68	84	LOC102551035	serine/arginine repetitive matrix protein 4-like		225	84	Sv2a	synaptic vesicle glycoprotein 2a		225	84	Sv2a	synaptic vesicle glycoprotein 2a		23	86	Wwp1	WW domain containing E3 ubiquitin protein ligase 1		43	90	Pum2	pumilio RNA-binding family member 2
226	84	Frmd5	FERM domain containing 5		226	84	Frmd5	FERM domain containing 5		226	84	Frmd5	FERM domain containing 5		23	95	Scn1a	sodium channel, voltage-gated, type I, alpha		97	80	Eps15	epidermal growth factor receptor pathway substrate 15		69	84	Ago1	argonaute RISC catalytic component 1		226	84	Frmd5	FERM domain containing 5		226	84	Frmd5	FERM domain containing 5		24	84	Lrp12	low density lipoprotein receptor-related protein 12		44	89	Ugt2b1	UDP glucuronosyltransferase 2 family, polypeptide B1
227	84	Cntln	centlein, centrosomal protein		227	84	Cntln	centlein, centrosomal protein		227	84	Cntln	centlein, centrosomal protein		24	95	Jmjd1c	jumonji domain containing 1C		98	80	Fktn	fukutin		70	84	Mmgt1	membrane magnesium transporter 1		227	84	Cntln	centlein, centrosomal protein		227	84	Cntln	centlein, centrosomal protein		25	83	Aff2	AF4/FMR2 family, member 2		45	89	Zfp148	zinc finger protein 148
228	84	Wwc2	WW and C2 domain containing 2		228	84	Wwc2	WW and C2 domain containing 2		228	84	Wwc2	WW and C2 domain containing 2		25	95	Upp2	uridine phosphorylase 2		99	80	Canx	calnexin		71	84	Rassf4	Ras association (RalGDS/AF-6) domain family member 4		228	84	Wwc2	WW and C2 domain containing 2		228	84	Wwc2	WW and C2 domain containing 2		26	83	Pde1c	phosphodiesterase 1C		46	89	Ubxn2b	UBX domain protein 2B
229	84	Fam155b	family with sequence similarity 155, member B		229	84	Fam155b	family with sequence similarity 155, member B		229	84	Fam155b	family with sequence similarity 155, member B		26	95	Fndc3a	fibronectin type III domain containing 3a		100	80	Cbx7	chromobox homolog 7		72	83	Arhgap42	Rho GTPase activating protein 42		229	84	Fam155b	family with sequence similarity 155, member B		229	84	Fam155b	family with sequence similarity 155, member B		27	82	Oprm1	opioid receptor, mu 1		47	88	Thbs2	thrombospondin 2
230	84	Zbtb7a	zinc finger and BTB domain containing 7a		230	84	Zbtb7a	zinc finger and BTB domain containing 7a		230	84	Zbtb7a	zinc finger and BTB domain containing 7a		27	94	Tmem43	transmembrane protein 43		1	100	Tshz3	teashirt zinc finger homeobox 3		73	83	Tc2n	tandem C2 domains, nuclear		230	84	Zbtb7a	zinc finger and BTB domain containing 7a		230	84	Zbtb7a	zinc finger and BTB domain containing 7a		28	81	Ubtd2	ubiquitin domain containing 2		48	88	Ppapdc1b	phosphatidic acid phosphatase type 2 domain containing 1B
231	84	Ppib	peptidylprolyl isomerase B		231	84	Ppib	peptidylprolyl isomerase B		231	84	Ppib	peptidylprolyl isomerase B		28	94	Crk	v-crk avian sarcoma virus CT10 oncogene homolog		2	98	Fam46a	family with sequence similarity 46, member A		74	83	RGD1565058	similar to RIKEN cDNA 1700019M22		231	84	Ppib	peptidylprolyl isomerase B		231	84	Ppib	peptidylprolyl isomerase B		29	81	Itgav	integrin, alpha V		49	88	Ptpn4	protein tyrosine phosphatase, non-receptor type 4
232	84	Scube1	signal peptide, CUB domain, EGF-like 1		232	84	Scube1	signal peptide, CUB domain, EGF-like 1		232	84	Scube1	signal peptide, CUB domain, EGF-like 1		29	94	Ubxn2b	UBX domain protein 2B		3	98	Rapgef2	Rap guanine nucleotide exchange factor (GEF) 2		75	83	Cbfa2t2	core-binding factor, runt domain, alpha subunit 2; translocated to, 2		232	84	Scube1	signal peptide, CUB domain, EGF-like 1		232	84	Scube1	signal peptide, CUB domain, EGF-like 1		30	81	Rabl3	RAB, member of RAS oncogene family-like 3		50	88	Kmt2e	lysine (K)-specific methyltransferase 2E
233	84	Tspan5	tetraspanin 5		233	84	Tspan5	tetraspanin 5		233	84	Tspan5	tetraspanin 5		30	94	Insig1	insulin induced gene 1		4	98	Zdhhc23	zinc finger, DHHC-type containing 23		76	83	Hsd11b2	hydroxysteroid 11-beta dehydrogenase 2		233	84	Tspan5	tetraspanin 5		233	84	Tspan5	tetraspanin 5		31	81	Gabrg2	gamma-aminobutyric acid (GABA) A receptor, gamma 2		51	88	Ccnj	cyclin J
234	84	Zswim1	zinc finger, SWIM-type containing 1		234	84	Zswim1	zinc finger, SWIM-type containing 1		234	84	Zswim1	zinc finger, SWIM-type containing 1		31	93	Fsd1l	fibronectin type III and SPRY domain containing 1-like		5	98	Nfat5	nuclear factor of activated T-cells 5, tonicity-responsive		77	83	Robo2	roundabout, axon guidance receptor, homolog 2 (Drosophila)		234	84	Zswim1	zinc finger, SWIM-type containing 1		234	84	Zswim1	zinc finger, SWIM-type containing 1		32	81	Hecw2	HECT, C2 and WW domain containing E3 ubiquitin protein ligase 2		52	87	Prepl	prolyl endopeptidase-like
235	84	Lipa	lipase A, lysosomal acid, cholesterol esterase		235	84	Lipa	lipase A, lysosomal acid, cholesterol esterase		235	84	Lipa	lipase A, lysosomal acid, cholesterol esterase		32	93	Asb3	ankyrin repeat and SOCS box-containing 3		6	98	Sbno1	strawberry notch homolog 1 (Drosophila)		78	83	Ncoa7	nuclear receptor coactivator 7		235	84	Lipa	lipase A, lysosomal acid, cholesterol esterase		235	84	Lipa	lipase A, lysosomal acid, cholesterol esterase		33	80	LOC100912573	membrane-spanning 4-domains subfamily A member 6B-like		53	87	Slc2a13	solute carrier family 2 (facilitated glucose transporter), member 13
236	84	Osbpl6	oxysterol binding protein-like 6		236	84	Osbpl6	oxysterol binding protein-like 6		236	84	Osbpl6	oxysterol binding protein-like 6		33	93	Rassf4	Ras association (RalGDS/AF-6) domain family member 4		7	98	Gpr85	G protein-coupled receptor 85		79	83	LOC102546630	protein gar2-like		236	84	Osbpl6	oxysterol binding protein-like 6		236	84	Osbpl6	oxysterol binding protein-like 6		34	80	Ms4a6bl	membrane-spanning 4-domains, subfamily A, member 6B-like		54	87	St7l	suppression of tumorigenicity 7-like
237	84	Fam174b	family with sequence similarity 174, member B		237	84	Fam174b	family with sequence similarity 174, member B		237	84	Fam174b	family with sequence similarity 174, member B		34	93	Far1	fatty acyl CoA reductase 1		8	98	Zfp513	zinc finger protein 513		80	83	LOC102557159	protein gar2-like		237	84	Fam174b	family with sequence similarity 174, member B		237	84	Fam174b	family with sequence similarity 174, member B		1	99	RGD1566359	similar to RIKEN cDNA B230219D22		55	87	Echdc1	enoyl CoA hydratase domain containing 1
238	83	Pitpnm3	PITPNM family member 3		238	83	Pitpnm3	PITPNM family member 3		238	83	Pitpnm3	PITPNM family member 3		35	93	Ccnj	cyclin J		9	97	Yy1	YY1 transcription factor		81	82	Slc26a6	solute carrier family 26 (anion exchanger), member 6		238	83	Pitpnm3	PITPNM family member 3		238	83	Pitpnm3	PITPNM family member 3		2	97	Kpna1	karyopherin alpha 1		56	86	Arhgap5	Rho GTPase activating protein 5
239	83	Tmx4	thioredoxin-related transmembrane protein 4		239	83	Tmx4	thioredoxin-related transmembrane protein 4		239	83	Tmx4	thioredoxin-related transmembrane protein 4		36	92	Abi1	abl-interactor 1		10	97	Tmem52b	transmembrane protein 52B		82	82	Rhoa	ras homolog family member A		239	83	Tmx4	thioredoxin-related transmembrane protein 4		239	83	Tmx4	thioredoxin-related transmembrane protein 4		3	96	Cpa4	carboxypeptidase A4		57	86	Bloc1s6	biogenesis of lysosomal organelles complex-1, subunit 6, pallidin
240	83	Ubn2	ubinuclein 2		240	83	Ubn2	ubinuclein 2		240	83	Ubn2	ubinuclein 2		37	92	Sele	selectin E		11	97	Nucks1	nuclear casein kinase and cyclin-dependent kinase substrate 1		83	82	Arl13b	ADP-ribosylation factor-like 13B		240	83	Ubn2	ubinuclein 2		240	83	Ubn2	ubinuclein 2		4	95	Bmper	BMP-binding endothelial regulator		58	86	Rb1cc1	RB1-inducible coiled-coil 1
241	83	Entpd7	ectonucleoside triphosphate diphosphohydrolase 7		241	83	Entpd7	ectonucleoside triphosphate diphosphohydrolase 7		241	83	Entpd7	ectonucleoside triphosphate diphosphohydrolase 7		38	92	Rapgef2	Rap guanine nucleotide exchange factor (GEF) 2		12	97	Prpf4b	pre-mRNA processing factor 4B		84	82	Klhl32	kelch-like family member 32		241	83	Entpd7	ectonucleoside triphosphate diphosphohydrolase 7		241	83	Entpd7	ectonucleoside triphosphate diphosphohydrolase 7		5	95	Cers6	ceramide synthase 6		59	85	Edem3	ER degradation enhancer, mannosidase alpha-like 3
242	83	Adcyap1r1	adenylate cyclase activating polypeptide 1 receptor 1		242	83	Adcyap1r1	adenylate cyclase activating polypeptide 1 receptor 1		242	83	Adcyap1r1	adenylate cyclase activating polypeptide 1 receptor 1		39	92	Camsap2	calmodulin regulated spectrin-associated protein family, member 2		13	96	Suclg2	succinate-CoA ligase, GDP-forming, beta subunit		85	82	Igf2bp1	insulin-like growth factor 2 mRNA binding protein 1		242	83	Adcyap1r1	adenylate cyclase activating polypeptide 1 receptor 1		242	83	Adcyap1r1	adenylate cyclase activating polypeptide 1 receptor 1		6	95	Cisd2	CDGSH iron sulfur domain 2		60	85	LOC100909825	probable isocitrate dehydrogenase [NAD] gamma 2, mitochondrial-like
243	83	Ldb3	LIM domain binding 3		243	83	Ldb3	LIM domain binding 3		243	83	Ldb3	LIM domain binding 3		40	91	RGD1560436	similar to hypothetical protein FLJ20508		14	96	Mtdh	metadherin		86	81	Epb41l1	erythrocyte membrane protein band 4.1-like 1		243	83	Ldb3	LIM domain binding 3		243	83	Ldb3	LIM domain binding 3		7	95	Ptprb	protein tyrosine phosphatase, receptor type, B		61	85	Lrrc55	leucine rich repeat containing 55
244	83	Aanat	aralkylamine N-acetyltransferase		244	83	Aanat	aralkylamine N-acetyltransferase		244	83	Aanat	aralkylamine N-acetyltransferase		41	91	Opa1	optic atrophy 1		15	96	Nfatc3	nuclear factor of activated T-cells, cytoplasmic, calcineurin-dependent 3		87	81	Herpud1	homocysteine-inducible, endoplasmic reticulum stress-inducible, ubiquitin-like domain member 1		244	83	Aanat	aralkylamine N-acetyltransferase		244	83	Aanat	aralkylamine N-acetyltransferase		8	94	Gata3	GATA binding protein 3		62	85	Enc1	ectodermal-neural cortex 1
245	83	Stk32a	serine/threonine kinase 32A		245	83	Stk32a	serine/threonine kinase 32A		245	83	Stk32a	serine/threonine kinase 32A		42	91	Golga3	golgin A3		16	95	Dpysl2	dihydropyrimidinase-like 2		88	81	Pip4k2b	phosphatidylinositol-5-phosphate 4-kinase, type II, beta		245	83	Stk32a	serine/threonine kinase 32A		245	83	Stk32a	serine/threonine kinase 32A		9	94	Foxn3	forkhead box N3		63	85	Fam84b	family with sequence similarity 84, member B
246	83	Dvl1	dishevelled segment polarity protein 1		246	83	Dvl1	dishevelled segment polarity protein 1		246	83	Dvl1	dishevelled segment polarity protein 1		43	91	Pdpr	pyruvate dehydrogenase phosphatase regulatory subunit		17	95	Kbtbd8	kelch repeat and BTB (POZ) domain containing 8		89	81	Btrc	beta-transducin repeat containing E3 ubiquitin protein ligase		246	83	Dvl1	dishevelled segment polarity protein 1		246	83	Dvl1	dishevelled segment polarity protein 1		10	94	Letm1	leucine zipper-EF-hand containing transmembrane protein 1		64	85	Cdan1	codanin 1
247	83	Tmeff2	transmembrane protein with EGF-like and two follistatin-like domains 2		247	83	Tmeff2	transmembrane protein with EGF-like and two follistatin-like domains 2		247	83	Tmeff2	transmembrane protein with EGF-like and two follistatin-like domains 2		44	91	Prpf4b	pre-mRNA processing factor 4B		18	95	Ide	insulin degrading enzyme		90	81	Rap1b	RAP1B, member of RAS oncogene family		247	83	Tmeff2	transmembrane protein with EGF-like and two follistatin-like domains 2		247	83	Tmeff2	transmembrane protein with EGF-like and two follistatin-like domains 2		11	93	Hs6st2	heparan sulfate 6-O-sulfotransferase 2		65	84	Dusp18	dual specificity phosphatase 18
248	83	Pip4k2b	phosphatidylinositol-5-phosphate 4-kinase, type II, beta		248	83	Pip4k2b	phosphatidylinositol-5-phosphate 4-kinase, type II, beta		248	83	Pip4k2b	phosphatidylinositol-5-phosphate 4-kinase, type II, beta		45	91	Hrasls	HRAS-like suppressor		19	95	RGD1309079	similar to Ab2-095		91	81	Fa2h	fatty acid 2-hydroxylase		248	83	Pip4k2b	phosphatidylinositol-5-phosphate 4-kinase, type II, beta		248	83	Pip4k2b	phosphatidylinositol-5-phosphate 4-kinase, type II, beta		12	92	Nova1	neuro-oncological ventral antigen 1		66	84	Ca1	carbonic anhydrase I
249	83	LOC498300	similar to degenerative spermatocyte homolog		249	83	LOC498300	similar to degenerative spermatocyte homolog		249	83	LOC498300	similar to degenerative spermatocyte homolog		46	91	C8b	complement component 8, beta polypeptide		20	95	Gpcpd1	glycerophosphocholine phosphodiesterase GDE1 homolog (S. cerevisiae)		92	81	Xpnpep2	X-prolyl aminopeptidase (aminopeptidase P) 2, membrane-bound		249	83	LOC498300	similar to degenerative spermatocyte homolog		249	83	LOC498300	similar to degenerative spermatocyte homolog		13	92	Frmd4b	FERM domain containing 4B		67	84	Mtmr3	myotubularin related protein 3
250	83	LOC102553683	keratin-associated protein 16-1-like		250	83	LOC102553683	keratin-associated protein 16-1-like		250	83	LOC102553683	keratin-associated protein 16-1-like		47	91	Gnai3	guanine nucleotide binding protein (G protein), alpha inhibiting activity polypeptide 3		21	95	Ier5	immediate early response 5		93	81	Ptbp3	polypyrimidine tract binding protein 3		250	83	LOC102553683	keratin-associated protein 16-1-like		250	83	LOC102553683	keratin-associated protein 16-1-like		14	91	Tspan3	tetraspanin 3		68	84	LOC102551035	serine/arginine repetitive matrix protein 4-like
251	83	Tstd2	thiosulfate sulfurtransferase (rhodanese)-like domain containing 2		251	83	Tstd2	thiosulfate sulfurtransferase (rhodanese)-like domain containing 2		251	83	Tstd2	thiosulfate sulfurtransferase (rhodanese)-like domain containing 2		48	90	Mypop	Myb-related transcription factor, partner of profilin		22	95	Med13	mediator complex subunit 13		94	81	Emilin3	elastin microfibril interfacer 3		251	83	Tstd2	thiosulfate sulfurtransferase (rhodanese)-like domain containing 2		251	83	Tstd2	thiosulfate sulfurtransferase (rhodanese)-like domain containing 2		15	90	Tmem30a	transmembrane protein 30A		69	84	Ago1	argonaute RISC catalytic component 1
252	83	Inpp4a	inositol polyphosphate-4-phosphatase, type I		252	83	Inpp4a	inositol polyphosphate-4-phosphatase, type I		252	83	Inpp4a	inositol polyphosphate-4-phosphatase, type I		49	90	Nfat5	nuclear factor of activated T-cells 5, tonicity-responsive		23	94	Pura	purine rich element binding protein A		95	80	Fndc3a	fibronectin type III domain containing 3a		252	83	Inpp4a	inositol polyphosphate-4-phosphatase, type I		252	83	Inpp4a	inositol polyphosphate-4-phosphatase, type I		16	90	Actr6	ARP6 actin-related protein 6 homolog (yeast)		70	84	Mmgt1	membrane magnesium transporter 1
253	83	Ncs1	neuronal calcium sensor 1		253	83	Ncs1	neuronal calcium sensor 1		253	83	Ncs1	neuronal calcium sensor 1		50	90	Pitpnc1	phosphatidylinositol transfer protein, cytoplasmic 1		24	94	Lats1	large tumor suppressor kinase 1		96	80	Pbrm1	polybromo 1		253	83	Ncs1	neuronal calcium sensor 1		253	83	Ncs1	neuronal calcium sensor 1		17	89	Nek9	NIMA-related kinase 9		71	84	Rassf4	Ras association (RalGDS/AF-6) domain family member 4
254	83	Abca9	ATP-binding cassette, subfamily A (ABC1), member 9		254	83	Abca9	ATP-binding cassette, subfamily A (ABC1), member 9		254	83	Abca9	ATP-binding cassette, subfamily A (ABC1), member 9		51	90	Ppl	periplakin		25	93	Timm44	translocase of inner mitochondrial membrane 44 homolog (yeast)		97	80	Eps15	epidermal growth factor receptor pathway substrate 15		254	83	Abca9	ATP-binding cassette, subfamily A (ABC1), member 9		254	83	Abca9	ATP-binding cassette, subfamily A (ABC1), member 9		18	89	Cenpi	centromere protein I		72	83	Arhgap42	Rho GTPase activating protein 42
255	83	Ppme1	protein phosphatase methylesterase 1		255	83	Ppme1	protein phosphatase methylesterase 1		255	83	Ppme1	protein phosphatase methylesterase 1		52	89	Papolg	poly(A) polymerase gamma		26	93	Ezh1	enhancer of zeste homolog 1 (Drosophila)		98	80	Fktn	fukutin		255	83	Ppme1	protein phosphatase methylesterase 1		255	83	Ppme1	protein phosphatase methylesterase 1		19	87	Ms4a4c	membrane-spanning 4-domains, subfamily A, member 4C		73	83	Tc2n	tandem C2 domains, nuclear
256	82	Pwwp2a	PWWP domain containing 2A		256	82	Pwwp2a	PWWP domain containing 2A		256	82	Pwwp2a	PWWP domain containing 2A		53	89	Rab9b	RAB9B, member RAS oncogene family		27	93	Gabrg2	gamma-aminobutyric acid (GABA) A receptor, gamma 2		99	80	Canx	calnexin		256	82	Pwwp2a	PWWP domain containing 2A		256	82	Pwwp2a	PWWP domain containing 2A		20	87	RGD1309747	similar to KIAA0947 protein		74	83	RGD1565058	similar to RIKEN cDNA 1700019M22
257	82	Trpm2	transient receptor potential cation channel, subfamily M, member 2		257	82	Trpm2	transient receptor potential cation channel, subfamily M, member 2		257	82	Trpm2	transient receptor potential cation channel, subfamily M, member 2		54	89	Aqp4	aquaporin 4		28	93	Cpeb4	cytoplasmic polyadenylation element binding protein 4		100	80	Cbx7	chromobox homolog 7		257	82	Trpm2	transient receptor potential cation channel, subfamily M, member 2		257	82	Trpm2	transient receptor potential cation channel, subfamily M, member 2		21	86	Clec1a	C-type lectin domain family 1, member A		75	83	Cbfa2t2	core-binding factor, runt domain, alpha subunit 2; translocated to, 2
258	82	Abl2	c-abl oncogene 2, non-receptor tyrosine kinase		258	82	Abl2	c-abl oncogene 2, non-receptor tyrosine kinase		258	82	Abl2	c-abl oncogene 2, non-receptor tyrosine kinase		55	88	RGD1309079	similar to Ab2-095		29	93	Zdhhc3	zinc finger, DHHC-type containing 3		1	99	Ptprm	protein tyrosine phosphatase, receptor type, M		258	82	Abl2	c-abl oncogene 2, non-receptor tyrosine kinase		258	82	Abl2	c-abl oncogene 2, non-receptor tyrosine kinase		22	86	Mrpl35	mitochondrial ribosomal protein L35		76	83	Hsd11b2	hydroxysteroid 11-beta dehydrogenase 2
259	82	LOC100909795	colorectal mutant cancer protein-like		259	82	LOC100909795	colorectal mutant cancer protein-like		259	82	LOC100909795	colorectal mutant cancer protein-like		56	88	Arih1	ariadne RBR E3 ubiquitin protein ligase 1		30	93	Rngtt	RNA guanylyltransferase and 5'-phosphatase		2	99	Ccdc88a	coiled coil domain containing 88A		259	82	LOC100909795	colorectal mutant cancer protein-like		259	82	LOC100909795	colorectal mutant cancer protein-like		23	86	Wwp1	WW domain containing E3 ubiquitin protein ligase 1		77	83	Robo2	roundabout, axon guidance receptor, homolog 2 (Drosophila)
260	82	Zfp354c	zinc finger protein 354C		260	82	Zfp354c	zinc finger protein 354C		260	82	Zfp354c	zinc finger protein 354C		57	88	Car13	carbonic anhydrase 13		31	93	Kcnh7	potassium voltage-gated channel, subfamily H (eag-related), member 7		3	99	Ythdf3	YTH domain family, member 3		260	82	Zfp354c	zinc finger protein 354C		260	82	Zfp354c	zinc finger protein 354C		24	84	Lrp12	low density lipoprotein receptor-related protein 12		78	83	Ncoa7	nuclear receptor coactivator 7
261	82	Shisa7	shisa family member 7		261	82	Shisa7	shisa family member 7		261	82	Shisa7	shisa family member 7		58	88	Ssh2	slingshot protein phosphatase 2		32	92	Vamp4	vesicle-associated membrane protein 4		4	98	Phf2	PHD finger protein 2		261	82	Shisa7	shisa family member 7		261	82	Shisa7	shisa family member 7		25	83	Aff2	AF4/FMR2 family, member 2		79	83	LOC102546630	protein gar2-like
262	82	Pdcd6ip	programmed cell death 6 interacting protein		262	82	Pdcd6ip	programmed cell death 6 interacting protein		262	82	Pdcd6ip	programmed cell death 6 interacting protein		59	87	Capn6	calpain 6		33	92	Epha7	Eph receptor A7		5	98	Edem3	ER degradation enhancer, mannosidase alpha-like 3		262	82	Pdcd6ip	programmed cell death 6 interacting protein		262	82	Pdcd6ip	programmed cell death 6 interacting protein		26	83	Pde1c	phosphodiesterase 1C		80	83	LOC102557159	protein gar2-like
263	82	Hpcal1	hippocalcin-like 1		263	82	Hpcal1	hippocalcin-like 1		263	82	Hpcal1	hippocalcin-like 1		60	87	Thy1	Thy-1 cell surface antigen		34	92	Vgll4	vestigial like 4 (Drosophila)		6	98	Socs4	suppressor of cytokine signaling 4		263	82	Hpcal1	hippocalcin-like 1		263	82	Hpcal1	hippocalcin-like 1		27	82	Oprm1	opioid receptor, mu 1		81	82	Slc26a6	solute carrier family 26 (anion exchanger), member 6
264	82	Bmp8b	bone morphogenetic protein 8b		264	82	Bmp8b	bone morphogenetic protein 8b		264	82	Bmp8b	bone morphogenetic protein 8b		61	86	Mex3b	mex-3 RNA binding family member B		35	92	Sirt7	sirtuin 7		7	97	Mex3c	mex-3 RNA binding family member C		264	82	Bmp8b	bone morphogenetic protein 8b		264	82	Bmp8b	bone morphogenetic protein 8b		28	81	Ubtd2	ubiquitin domain containing 2		82	82	Rhoa	ras homolog family member A
265	82	PVR	poliovirus receptor		265	82	PVR	poliovirus receptor		265	82	PVR	poliovirus receptor		62	86	Pum2	pumilio RNA-binding family member 2		36	91	Kctd6	potassium channel tetramerization domain containing 6		8	97	Usp6nl	USP6 N-terminal like		265	82	PVR	poliovirus receptor		265	82	PVR	poliovirus receptor		29	81	Itgav	integrin, alpha V		83	82	Arl13b	ADP-ribosylation factor-like 13B
266	82	Ccdc38	coiled-coil domain containing 38		266	82	Ccdc38	coiled-coil domain containing 38		266	82	Ccdc38	coiled-coil domain containing 38		63	86	Serp1	stress-associated endoplasmic reticulum protein 1		37	91	LOC100909688	zinc finger protein 43-like		9	96	Cntn4	contactin 4		266	82	Ccdc38	coiled-coil domain containing 38		266	82	Ccdc38	coiled-coil domain containing 38		30	81	Rabl3	RAB, member of RAS oncogene family-like 3		84	82	Klhl32	kelch-like family member 32
267	82	Elmsan1	ELM2 and Myb/SANT-like domain containing 1		267	82	Elmsan1	ELM2 and Myb/SANT-like domain containing 1		267	82	Elmsan1	ELM2 and Myb/SANT-like domain containing 1		64	86	Herc2	HECT and RLD domain containing E3 ubiquitin protein ligase 2		38	91	Capn6	calpain 6		10	96	Wdfy3	WD repeat and FYVE domain containing 3		267	82	Elmsan1	ELM2 and Myb/SANT-like domain containing 1		267	82	Elmsan1	ELM2 and Myb/SANT-like domain containing 1		31	81	Gabrg2	gamma-aminobutyric acid (GABA) A receptor, gamma 2		85	82	Igf2bp1	insulin-like growth factor 2 mRNA binding protein 1
268	82	Bzrap1	benzodiazapine receptor (peripheral) associated protein 1		268	82	Bzrap1	benzodiazapine receptor (peripheral) associated protein 1		268	82	Bzrap1	benzodiazapine receptor (peripheral) associated protein 1		65	86	Zbtb11	zinc finger and BTB domain containing 11		39	91	Brinp3	bone morphogenetic protein/retinoic acid inducible neural-specific 3		11	95	N4bp2	NEDD4 binding protein 2		268	82	Bzrap1	benzodiazapine receptor (peripheral) associated protein 1		268	82	Bzrap1	benzodiazapine receptor (peripheral) associated protein 1		32	81	Hecw2	HECT, C2 and WW domain containing E3 ubiquitin protein ligase 2		86	81	Epb41l1	erythrocyte membrane protein band 4.1-like 1
269	82	Thsd1	thrombospondin, type I, domain containing 1		269	82	Thsd1	thrombospondin, type I, domain containing 1		269	82	Thsd1	thrombospondin, type I, domain containing 1		66	85	Oxr1	oxidation resistance 1		40	91	Strn3	striatin, calmodulin binding protein 3		12	95	Ppp6c	protein phosphatase 6, catalytic subunit		269	82	Thsd1	thrombospondin, type I, domain containing 1		269	82	Thsd1	thrombospondin, type I, domain containing 1		33	80	LOC100912573	membrane-spanning 4-domains subfamily A member 6B-like		87	81	Herpud1	homocysteine-inducible, endoplasmic reticulum stress-inducible, ubiquitin-like domain member 1
270	82	Vipas39	VPS33B interacting protein, apical-basolateral polarity regulator, spe-39 homolog		270	82	Vipas39	VPS33B interacting protein, apical-basolateral polarity regulator, spe-39 homolog		270	82	Vipas39	VPS33B interacting protein, apical-basolateral polarity regulator, spe-39 homolog		67	85	Setd5	SET domain containing 5		41	90	Golga3	golgin A3		13	94	Ino80d	INO80 complex subunit D		270	82	Vipas39	VPS33B interacting protein, apical-basolateral polarity regulator, spe-39 homolog		270	82	Vipas39	VPS33B interacting protein, apical-basolateral polarity regulator, spe-39 homolog		34	80	Ms4a6bl	membrane-spanning 4-domains, subfamily A, member 6B-like		88	81	Pip4k2b	phosphatidylinositol-5-phosphate 4-kinase, type II, beta
271	82	LOC102546890	pogo transposable element with ZNF domain-like		271	82	LOC102546890	pogo transposable element with ZNF domain-like		271	82	LOC102546890	pogo transposable element with ZNF domain-like		68	85	Tcf7l2	transcription factor 7-like 2 (T-cell specific, HMG-box)		42	90	Ube2d2	ubiquitin-conjugating enzyme E2D 2		14	94	Sar1b	SAR1 homolog B (S. cerevisiae)		271	82	LOC102546890	pogo transposable element with ZNF domain-like		271	82	LOC102546890	pogo transposable element with ZNF domain-like							89	81	Btrc	beta-transducin repeat containing E3 ubiquitin protein ligase
272	82	Nit1	nitrilase 1		272	82	Nit1	nitrilase 1		272	82	Nit1	nitrilase 1		69	85	Ankrd29	ankyrin repeat domain 29		43	90	Pum2	pumilio RNA-binding family member 2		15	94	Cdc27	cell division cycle 27		272	82	Nit1	nitrilase 1		272	82	Nit1	nitrilase 1							90	81	Rap1b	RAP1B, member of RAS oncogene family
273	81	Klf10	Kruppel-like factor 10		273	81	Klf10	Kruppel-like factor 10		273	81	Klf10	Kruppel-like factor 10		70	85	Cdca2	cell division cycle associated 2		44	89	Ugt2b1	UDP glucuronosyltransferase 2 family, polypeptide B1		16	94	Xpo1	exportin 1, CRM1 homolog (yeast)		273	81	Klf10	Kruppel-like factor 10		273	81	Klf10	Kruppel-like factor 10							91	81	Fa2h	fatty acid 2-hydroxylase
274	81	Palm	paralemmin		274	81	Palm	paralemmin		274	81	Palm	paralemmin		71	85	Sgpp1	sphingosine-1-phosphate phosphatase 1		45	89	Zfp148	zinc finger protein 148		17	93	Btbd7	BTB (POZ) domain containing 7		274	81	Palm	paralemmin		274	81	Palm	paralemmin							92	81	Xpnpep2	X-prolyl aminopeptidase (aminopeptidase P) 2, membrane-bound
275	81	Pappa	pregnancy-associated plasma protein A		275	81	Pappa	pregnancy-associated plasma protein A		275	81	Pappa	pregnancy-associated plasma protein A		72	85	Als2cl	ALS2 C-terminal like		46	89	Ubxn2b	UBX domain protein 2B		18	93	Lrat	lecithin-retinol acyltransferase (phosphatidylcholine-retinol-O-acyltransferase)		275	81	Pappa	pregnancy-associated plasma protein A		275	81	Pappa	pregnancy-associated plasma protein A							93	81	Ptbp3	polypyrimidine tract binding protein 3
276	81	Ankrd28	ankyrin repeat domain 28		276	81	Ankrd28	ankyrin repeat domain 28		276	81	Ankrd28	ankyrin repeat domain 28		73	84	Rassf5	Ras association (RalGDS/AF-6) domain family member 5		47	88	Thbs2	thrombospondin 2		19	93	Col15a1	collagen, type XV, alpha 1		276	81	Ankrd28	ankyrin repeat domain 28		276	81	Ankrd28	ankyrin repeat domain 28							94	81	Emilin3	elastin microfibril interfacer 3
277	81	Tmeff1	transmembrane protein with EGF-like and two follistatin-like domains 1		277	81	Tmeff1	transmembrane protein with EGF-like and two follistatin-like domains 1		277	81	Tmeff1	transmembrane protein with EGF-like and two follistatin-like domains 1		74	84	Gpam	glycerol-3-phosphate acyltransferase, mitochondrial		48	88	Ppapdc1b	phosphatidic acid phosphatase type 2 domain containing 1B		20	92	Clvs1	clavesin 1		277	81	Tmeff1	transmembrane protein with EGF-like and two follistatin-like domains 1		277	81	Tmeff1	transmembrane protein with EGF-like and two follistatin-like domains 1							95	80	Fndc3a	fibronectin type III domain containing 3a
278	81	LOC100912012	tetranectin-like		278	81	LOC100912012	tetranectin-like		278	81	LOC100912012	tetranectin-like		75	84	LOC102556920	uncharacterized LOC102556920		49	88	Ptpn4	protein tyrosine phosphatase, non-receptor type 4		21	92	Asxl2	additional sex combs like 2 (Drosophila)		278	81	LOC100912012	tetranectin-like		278	81	LOC100912012	tetranectin-like							96	80	Pbrm1	polybromo 1
279	81	Birc6	baculoviral IAP repeat-containing 6		279	81	Birc6	baculoviral IAP repeat-containing 6		279	81	Birc6	baculoviral IAP repeat-containing 6		76	84	Slc2a13	solute carrier family 2 (facilitated glucose transporter), member 13		50	88	Kmt2e	lysine (K)-specific methyltransferase 2E		22	92	Fech	ferrochelatase		279	81	Birc6	baculoviral IAP repeat-containing 6		279	81	Birc6	baculoviral IAP repeat-containing 6							97	80	Eps15	epidermal growth factor receptor pathway substrate 15
280	81	Atl1	atlastin GTPase 1		280	81	Atl1	atlastin GTPase 1		280	81	Atl1	atlastin GTPase 1		77	84	Ptbp3	polypyrimidine tract binding protein 3		51	88	Ccnj	cyclin J		23	92	Phf8	PHD finger protein 8		280	81	Atl1	atlastin GTPase 1		280	81	Atl1	atlastin GTPase 1							98	80	Fktn	fukutin
281	81	Dgkg	diacylglycerol kinase, gamma		281	81	Dgkg	diacylglycerol kinase, gamma		281	81	Dgkg	diacylglycerol kinase, gamma		78	83	Cdkn1c	cyclin-dependent kinase inhibitor 1C		52	87	Prepl	prolyl endopeptidase-like		24	91	Gria2	glutamate receptor, ionotropic, AMPA 2		281	81	Dgkg	diacylglycerol kinase, gamma		281	81	Dgkg	diacylglycerol kinase, gamma							99	80	Canx	calnexin
282	81	Sorbs3	sorbin and SH3 domain containing 3		282	81	Sorbs3	sorbin and SH3 domain containing 3		282	81	Sorbs3	sorbin and SH3 domain containing 3		79	83	Xpo4	exportin 4		53	87	Slc2a13	solute carrier family 2 (facilitated glucose transporter), member 13		25	91	Med14	mediator complex subunit 14		282	81	Sorbs3	sorbin and SH3 domain containing 3		282	81	Sorbs3	sorbin and SH3 domain containing 3							100	80	Cbx7	chromobox homolog 7
283	81	Slc37a2	solute carrier family 37 (glucose-6-phosphate transporter), member 2		283	81	Slc37a2	solute carrier family 37 (glucose-6-phosphate transporter), member 2		283	81	Slc37a2	solute carrier family 37 (glucose-6-phosphate transporter), member 2		80	82	Arhgap5	Rho GTPase activating protein 5		54	87	St7l	suppression of tumorigenicity 7-like		26	91	Chic1	cysteine-rich hydrophobic domain 1		283	81	Slc37a2	solute carrier family 37 (glucose-6-phosphate transporter), member 2		283	81	Slc37a2	solute carrier family 37 (glucose-6-phosphate transporter), member 2							1	100	Tshz3	teashirt zinc finger homeobox 3
284	81	LOC102552271	uncharacterized LOC102552271		284	81	LOC102552271	uncharacterized LOC102552271		284	81	LOC102552271	uncharacterized LOC102552271		81	82	Stard4	StAR-related lipid transfer (START) domain containing 4		55	87	Echdc1	enoyl CoA hydratase domain containing 1		27	91	Prrg1	proline rich Gla (G-carboxyglutamic acid) 1		284	81	LOC102552271	uncharacterized LOC102552271		284	81	LOC102552271	uncharacterized LOC102552271							2	98	Fam46a	family with sequence similarity 46, member A
285	81	LOC102556744	uncharacterized LOC102556744		285	81	LOC102556744	uncharacterized LOC102556744		285	81	LOC102556744	uncharacterized LOC102556744		82	82	Scn2a1	sodium channel, voltage-gated, type II, alpha 1		56	86	Arhgap5	Rho GTPase activating protein 5		28	91	Adam10	ADAM metallopeptidase domain 10		285	81	LOC102556744	uncharacterized LOC102556744		285	81	LOC102556744	uncharacterized LOC102556744							3	98	Rapgef2	Rap guanine nucleotide exchange factor (GEF) 2
286	81	Cpne8	copine VIII		286	81	Cpne8	copine VIII		286	81	Cpne8	copine VIII		83	82	Ubl3	ubiquitin-like 3		57	86	Bloc1s6	biogenesis of lysosomal organelles complex-1, subunit 6, pallidin		29	89	Srsf1	serine/arginine-rich splicing factor 1		286	81	Cpne8	copine VIII		286	81	Cpne8	copine VIII							4	98	Zdhhc23	zinc finger, DHHC-type containing 23
287	81	Dusp18	dual specificity phosphatase 18		287	81	Dusp18	dual specificity phosphatase 18		287	81	Dusp18	dual specificity phosphatase 18		84	82	Pan3	PAN3 polyA specific ribonuclease subunit homolog (S. cerevisiae)		58	86	Rb1cc1	RB1-inducible coiled-coil 1		30	89	Creb1	cAMP responsive element binding protein 1		287	81	Dusp18	dual specificity phosphatase 18		287	81	Dusp18	dual specificity phosphatase 18							5	98	Nfat5	nuclear factor of activated T-cells 5, tonicity-responsive
288	81	Arhgef40	Rho guanine nucleotide exchange factor (GEF) 40		288	81	Arhgef40	Rho guanine nucleotide exchange factor (GEF) 40		288	81	Arhgef40	Rho guanine nucleotide exchange factor (GEF) 40		85	82	Nfkb1	nuclear factor of kappa light polypeptide gene enhancer in B-cells 1		59	85	Edem3	ER degradation enhancer, mannosidase alpha-like 3		31	88	Ddx60	DEAD (Asp-Glu-Ala-Asp) box polypeptide 60		288	81	Arhgef40	Rho guanine nucleotide exchange factor (GEF) 40		288	81	Arhgef40	Rho guanine nucleotide exchange factor (GEF) 40							6	98	Sbno1	strawberry notch homolog 1 (Drosophila)
289	81	Angpt1	angiopoietin 1		289	81	Angpt1	angiopoietin 1		289	81	Angpt1	angiopoietin 1		86	82	Slc10a3	solute carrier family 10, member 3		60	85	LOC100909825	probable isocitrate dehydrogenase [NAD] gamma 2, mitochondrial-like		32	88	Pde5a	phosphodiesterase 5A, cGMP-specific		289	81	Angpt1	angiopoietin 1		289	81	Angpt1	angiopoietin 1							7	98	Gpr85	G protein-coupled receptor 85
290	81	Canx	calnexin		290	81	Canx	calnexin		290	81	Canx	calnexin		87	82	Gria3	glutamate receptor, ionotropic, AMPA 3		61	85	Lrrc55	leucine rich repeat containing 55		33	88	Abhd10	abhydrolase domain containing 10		290	81	Canx	calnexin		290	81	Canx	calnexin							8	98	Zfp513	zinc finger protein 513
291	81	Nme1	NME/NM23 nucleoside diphosphate kinase 1		291	81	Nme1	NME/NM23 nucleoside diphosphate kinase 1		291	81	Nme1	NME/NM23 nucleoside diphosphate kinase 1		88	81	Rffl	ring finger and FYVE-like domain containing E3 ubiquitin protein ligase		62	85	Enc1	ectodermal-neural cortex 1		34	88	Ptprb	protein tyrosine phosphatase, receptor type, B		291	81	Nme1	NME/NM23 nucleoside diphosphate kinase 1		291	81	Nme1	NME/NM23 nucleoside diphosphate kinase 1							9	97	Yy1	YY1 transcription factor
292	81	LOC102553002	zinc finger protein 8-like		292	81	LOC102553002	zinc finger protein 8-like		292	81	LOC102553002	zinc finger protein 8-like		89	81	Hivep3	human immunodeficiency virus type I enhancer binding protein 3		63	85	Fam84b	family with sequence similarity 84, member B		35	88	Trps1	trichorhinophalangeal syndrome I		292	81	LOC102553002	zinc finger protein 8-like		292	81	LOC102553002	zinc finger protein 8-like							10	97	Tmem52b	transmembrane protein 52B
293	80	Hlcs	holocarboxylase synthetase (biotin-(proprionyl-CoA-carboxylase (ATP-hydrolysing)) ligase)		293	80	Hlcs	holocarboxylase synthetase (biotin-(proprionyl-CoA-carboxylase (ATP-hydrolysing)) ligase)		293	80	Hlcs	holocarboxylase synthetase (biotin-(proprionyl-CoA-carboxylase (ATP-hydrolysing)) ligase)		90	81	Osbpl9	oxysterol binding protein-like 9		64	85	Cdan1	codanin 1		36	88	Htr2c	5-hydroxytryptamine (serotonin) receptor 2C, G protein-coupled		293	80	Hlcs	holocarboxylase synthetase (biotin-(proprionyl-CoA-carboxylase (ATP-hydrolysing)) ligase)		293	80	Hlcs	holocarboxylase synthetase (biotin-(proprionyl-CoA-carboxylase (ATP-hydrolysing)) ligase)							11	97	Nucks1	nuclear casein kinase and cyclin-dependent kinase substrate 1
294	80	Fam198a	family with sequence similarity 198, member A		294	80	Fam198a	family with sequence similarity 198, member A		294	80	Fam198a	family with sequence similarity 198, member A		91	81	Lipt2	lipoyl(octanoyl) transferase 2 (putative)		65	84	Dusp18	dual specificity phosphatase 18		37	87	Tpd52	tumor protein D52		294	80	Fam198a	family with sequence similarity 198, member A		294	80	Fam198a	family with sequence similarity 198, member A							12	97	Prpf4b	pre-mRNA processing factor 4B
295	80	Rgsl1	regulator of G-protein signaling like 1		295	80	Rgsl1	regulator of G-protein signaling like 1		295	80	Rgsl1	regulator of G-protein signaling like 1		92	81	Inadl	InaD-like (Drosophila)		66	84	Ca1	carbonic anhydrase I		38	87	Frmd5	FERM domain containing 5		295	80	Rgsl1	regulator of G-protein signaling like 1		295	80	Rgsl1	regulator of G-protein signaling like 1							13	96	Suclg2	succinate-CoA ligase, GDP-forming, beta subunit
296	80	Efemp1	EGF-containing fibulin-like extracellular matrix protein 1		296	80	Efemp1	EGF-containing fibulin-like extracellular matrix protein 1		296	80	Efemp1	EGF-containing fibulin-like extracellular matrix protein 1		93	81	RGD1310495	similar to KIAA1919 protein		67	84	Mtmr3	myotubularin related protein 3		39	86	Tbx22	T-box 22		296	80	Efemp1	EGF-containing fibulin-like extracellular matrix protein 1		296	80	Efemp1	EGF-containing fibulin-like extracellular matrix protein 1							14	96	Mtdh	metadherin
297	80	C9	complement component 9		297	80	C9	complement component 9		297	80	C9	complement component 9		94	81	LOC100909688	zinc finger protein 43-like		68	84	LOC102551035	serine/arginine repetitive matrix protein 4-like		40	86	Tvp23b	trans-golgi network vesicle protein 23 homolog B (S. cerevisiae)		297	80	C9	complement component 9		297	80	C9	complement component 9							15	96	Nfatc3	nuclear factor of activated T-cells, cytoplasmic, calcineurin-dependent 3
298	80	Doc2a	double C2-like domains, alpha		298	80	Doc2a	double C2-like domains, alpha		298	80	Doc2a	double C2-like domains, alpha		95	81	Ddhd1	DDHD domain containing 1		69	84	Ago1	argonaute RISC catalytic component 1		41	86	Rnf19a	ring finger protein 19A, RBR E3 ubiquitin protein ligase		298	80	Doc2a	double C2-like domains, alpha		298	80	Doc2a	double C2-like domains, alpha							16	95	Dpysl2	dihydropyrimidinase-like 2
299	80	Slc6a2	solute carrier family 6 (neurotransmitter transporter), member 2		299	80	Slc6a2	solute carrier family 6 (neurotransmitter transporter), member 2		299	80	Slc6a2	solute carrier family 6 (neurotransmitter transporter), member 2		96	81	Bcor	BCL6 co-repressor		70	84	Mmgt1	membrane magnesium transporter 1		42	86	Col4a5	collagen, type IV, alpha 5		299	80	Slc6a2	solute carrier family 6 (neurotransmitter transporter), member 2		299	80	Slc6a2	solute carrier family 6 (neurotransmitter transporter), member 2							17	95	Kbtbd8	kelch repeat and BTB (POZ) domain containing 8
300	80	Cep104	centrosomal protein 104		300	80	Cep104	centrosomal protein 104		300	80	Cep104	centrosomal protein 104		97	80	LOC100911615	patatin-like phospholipase domain-containing protein 2-like		71	84	Rassf4	Ras association (RalGDS/AF-6) domain family member 4		43	86	Prpf38b	pre-mRNA processing factor 38B		300	80	Cep104	centrosomal protein 104		300	80	Cep104	centrosomal protein 104							18	95	Ide	insulin degrading enzyme
301	80	Cndp2	CNDP dipeptidase 2 (metallopeptidase M20 family)		301	80	Cndp2	CNDP dipeptidase 2 (metallopeptidase M20 family)		301	80	Cndp2	CNDP dipeptidase 2 (metallopeptidase M20 family)		98	80	Aph1a	APH1A gamma secretase subunit		72	83	Arhgap42	Rho GTPase activating protein 42		44	85	Ywhaz	tyrosine 3-monooxygenase/tryptophan 5-monooxygenase activation protein, zeta		301	80	Cndp2	CNDP dipeptidase 2 (metallopeptidase M20 family)		301	80	Cndp2	CNDP dipeptidase 2 (metallopeptidase M20 family)							19	95	RGD1309079	similar to Ab2-095
302	80	LOC684828	similar to Histone H1.2 (H1 VAR.1) (H1c)		302	80	LOC684828	similar to Histone H1.2 (H1 VAR.1) (H1c)		302	80	LOC684828	similar to Histone H1.2 (H1 VAR.1) (H1c)		99	80	Pnpla2	patatin-like phospholipase domain containing 2		73	83	Tc2n	tandem C2 domains, nuclear		45	85	Kcnk2	potassium channel, subfamily K, member 2		302	80	LOC684828	similar to Histone H1.2 (H1 VAR.1) (H1c)		302	80	LOC684828	similar to Histone H1.2 (H1 VAR.1) (H1c)							20	95	Gpcpd1	glycerophosphocholine phosphodiesterase GDE1 homolog (S. cerevisiae)
303	80	Rufy4	RUN and FYVE domain containing 4		303	80	Rufy4	RUN and FYVE domain containing 4		303	80	Rufy4	RUN and FYVE domain containing 4		100	80	2017-09-10	septin 10		74	83	RGD1565058	similar to RIKEN cDNA 1700019M22		46	85	Serpinb7	serpin peptidase inhibitor, clade B (ovalbumin), member 7		303	80	Rufy4	RUN and FYVE domain containing 4		303	80	Rufy4	RUN and FYVE domain containing 4							21	95	Ier5	immediate early response 5
304	80	Usp30	ubiquitin specific peptidase 30		304	80	Usp30	ubiquitin specific peptidase 30		304	80	Usp30	ubiquitin specific peptidase 30		101	80	Fam102b	family with sequence similarity 102, member B		75	83	Cbfa2t2	core-binding factor, runt domain, alpha subunit 2; translocated to, 2		47	85	Mysm1	myb-like, SWIRM and MPN domains 1		304	80	Usp30	ubiquitin specific peptidase 30		304	80	Usp30	ubiquitin specific peptidase 30							22	95	Med13	mediator complex subunit 13
305	80	Pde1c	phosphodiesterase 1C		305	80	Pde1c	phosphodiesterase 1C		305	80	Pde1c	phosphodiesterase 1C		102	80	Tshz3	teashirt zinc finger homeobox 3		76	83	Hsd11b2	hydroxysteroid 11-beta dehydrogenase 2		48	84	Phex	phosphate regulating endopeptidase homolog, X-linked		305	80	Pde1c	phosphodiesterase 1C		305	80	Pde1c	phosphodiesterase 1C							23	94	Pura	purine rich element binding protein A
306	80	Eri3	ERI1 exoribonuclease family member 3		306	80	Eri3	ERI1 exoribonuclease family member 3		306	80	Eri3	ERI1 exoribonuclease family member 3		103	80	Epas1	endothelial PAS domain protein 1		77	83	Robo2	roundabout, axon guidance receptor, homolog 2 (Drosophila)		49	84	Clcn3	chloride channel, voltage-sensitive 3		306	80	Eri3	ERI1 exoribonuclease family member 3		306	80	Eri3	ERI1 exoribonuclease family member 3							24	94	Lats1	large tumor suppressor kinase 1
307	80	Adra2b	adrenoceptor alpha 2B		307	80	Adra2b	adrenoceptor alpha 2B		307	80	Adra2b	adrenoceptor alpha 2B		1	100	Arid2	AT rich interactive domain 2 (Arid-rfx like)		78	83	Ncoa7	nuclear receptor coactivator 7		50	84	Prpf4b	pre-mRNA processing factor 4B		307	80	Adra2b	adrenoceptor alpha 2B		307	80	Adra2b	adrenoceptor alpha 2B							25	93	Timm44	translocase of inner mitochondrial membrane 44 homolog (yeast)
308	80	Rgs22	regulator of G-protein signaling 22		308	80	Rgs22	regulator of G-protein signaling 22		308	80	Rgs22	regulator of G-protein signaling 22		2	99	Nfia	nuclear factor I/A		79	83	LOC102546630	protein gar2-like		51	84	Apip	APAF1 interacting protein		308	80	Rgs22	regulator of G-protein signaling 22		308	80	Rgs22	regulator of G-protein signaling 22							26	93	Ezh1	enhancer of zeste homolog 1 (Drosophila)
309	80	Nfatc2	nuclear factor of activated T-cells, cytoplasmic, calcineurin-dependent 2		309	80	Nfatc2	nuclear factor of activated T-cells, cytoplasmic, calcineurin-dependent 2		309	80	Nfatc2	nuclear factor of activated T-cells, cytoplasmic, calcineurin-dependent 2		3	99	Xrn1	5'-3' exoribonuclease 1		80	83	LOC102557159	protein gar2-like		52	84	Med13	mediator complex subunit 13		309	80	Nfatc2	nuclear factor of activated T-cells, cytoplasmic, calcineurin-dependent 2		309	80	Nfatc2	nuclear factor of activated T-cells, cytoplasmic, calcineurin-dependent 2							27	93	Gabrg2	gamma-aminobutyric acid (GABA) A receptor, gamma 2
310	80	Ptgfr	prostaglandin F receptor		310	80	Ptgfr	prostaglandin F receptor		310	80	Ptgfr	prostaglandin F receptor		4	99	Bmpr2	bone morphogenetic protein receptor, type II (serine/threonine kinase)		81	82	Slc26a6	solute carrier family 26 (anion exchanger), member 6		53	84	Pak3	p21 protein (Cdc42/Rac)-activated kinase 3		310	80	Ptgfr	prostaglandin F receptor		310	80	Ptgfr	prostaglandin F receptor							28	93	Cpeb4	cytoplasmic polyadenylation element binding protein 4
311	80	Myd88	myeloid differentiation primary response 88		311	80	Myd88	myeloid differentiation primary response 88		311	80	Myd88	myeloid differentiation primary response 88		5	98	Gpr116	G protein-coupled receptor 116		82	82	Rhoa	ras homolog family member A		54	83	Qrich1	glutamine-rich 1		311	80	Myd88	myeloid differentiation primary response 88		311	80	Myd88	myeloid differentiation primary response 88							29	93	Zdhhc3	zinc finger, DHHC-type containing 3
1	97	Bcor	BCL6 co-repressor		1	97	Bcor	BCL6 co-repressor		1	97	Bcor	BCL6 co-repressor		6	98	Rab9b	RAB9B, member RAS oncogene family		83	82	Arl13b	ADP-ribosylation factor-like 13B		55	83	Sptssa	serine palmitoyltransferase, small subunit A		1	97	Bcor	BCL6 co-repressor		1	99	Arel1	apoptosis resistant E3 ubiquitin protein ligase 1							30	93	Rngtt	RNA guanylyltransferase and 5'-phosphatase
2	96	Slitrk1	SLIT and NTRK-like family, member 1		2	96	Slitrk1	SLIT and NTRK-like family, member 1		2	96	Slitrk1	SLIT and NTRK-like family, member 1		7	97	Atp2b2	ATPase, Ca++ transporting, plasma membrane 2		84	82	Klhl32	kelch-like family member 32		56	83	RGD1563666	similar to chromosome X open reading frame 43		2	96	Slitrk1	SLIT and NTRK-like family, member 1		2	99	Abcg4	ATP-binding cassette, subfamily G (WHITE), member 4							31	93	Kcnh7	potassium voltage-gated channel, subfamily H (eag-related), member 7
3	94	Egfl6	EGF-like-domain, multiple 6		3	94	Egfl6	EGF-like-domain, multiple 6		3	94	Egfl6	EGF-like-domain, multiple 6		8	97	Grm3	glutamate receptor, metabotropic 3		85	82	Igf2bp1	insulin-like growth factor 2 mRNA binding protein 1		57	83	Acsm2a	acyl-CoA synthetase medium-chain family member 2A		3	94	Egfl6	EGF-like-domain, multiple 6		3	99	Gpr157	G protein-coupled receptor 157							32	92	Vamp4	vesicle-associated membrane protein 4
4	93	Phip	pleckstrin homology domain interacting protein		4	93	Phip	pleckstrin homology domain interacting protein		4	93	Phip	pleckstrin homology domain interacting protein		9	97	Angpt1	angiopoietin 1		86	81	Epb41l1	erythrocyte membrane protein band 4.1-like 1		58	83	Elavl4	ELAV like neuron-specific RNA binding protein 4		4	93	Phip	pleckstrin homology domain interacting protein		4	97	Ebf3	early B-cell factor 3							33	92	Epha7	Eph receptor A7
5	92	Pcdh9	protocadherin 9		5	92	Pcdh9	protocadherin 9		5	92	Pcdh9	protocadherin 9		10	96	Arrdc3	arrestin domain containing 3		87	81	Herpud1	homocysteine-inducible, endoplasmic reticulum stress-inducible, ubiquitin-like domain member 1		59	82	Col19a1	collagen, type XIX, alpha 1		5	92	Pcdh9	protocadherin 9		5	97	Bmpr1a	bone morphogenetic protein receptor, type IA							34	92	Vgll4	vestigial like 4 (Drosophila)
6	91	Cd53	Cd53 molecule		6	91	Cd53	Cd53 molecule		6	91	Cd53	Cd53 molecule		11	95	Acly	ATP citrate lyase		88	81	Pip4k2b	phosphatidylinositol-5-phosphate 4-kinase, type II, beta		60	82	Pcm1	pericentriolar material 1		6	91	Cd53	Cd53 molecule		6	96	Tmem182	transmembrane protein 182							35	92	Sirt7	sirtuin 7
7	88	Stac	SH3 and cysteine rich domain		7	88	Stac	SH3 and cysteine rich domain		7	88	Stac	SH3 and cysteine rich domain		12	94	Ibtk	inhibitor of Bruton agammaglobulinemia tyrosine kinase		89	81	Btrc	beta-transducin repeat containing E3 ubiquitin protein ligase		61	82	Fubp1	far upstream element (FUSE) binding protein 1		7	88	Stac	SH3 and cysteine rich domain		7	96	Osm	oncostatin M							36	91	Kctd6	potassium channel tetramerization domain containing 6
8	87	Elavl2	ELAV like neuron-specific RNA binding protein 2		8	87	Elavl2	ELAV like neuron-specific RNA binding protein 2		8	87	Elavl2	ELAV like neuron-specific RNA binding protein 2		13	94	Amot	angiomotin		90	81	Rap1b	RAP1B, member of RAS oncogene family		62	82	Cpne4	copine IV		8	87	Elavl2	ELAV like neuron-specific RNA binding protein 2		8	95	Crebrf	CREB3 regulatory factor							37	91	LOC100909688	zinc finger protein 43-like
9	87	Klhl28	kelch-like family member 28		9	87	Klhl28	kelch-like family member 28		9	87	Klhl28	kelch-like family member 28		14	94	Mfsd1	major facilitator superfamily domain containing 1		91	81	Fa2h	fatty acid 2-hydroxylase		63	82	Slc6a15	solute carrier family 6 (neutral amino acid transporter), member 15		9	87	Klhl28	kelch-like family member 28		9	95	Hnrnpf	heterogeneous nuclear ribonucleoprotein F							38	91	Capn6	calpain 6
10	86	Fam134c	family with sequence similarity 134, member C		10	86	Fam134c	family with sequence similarity 134, member C		10	86	Fam134c	family with sequence similarity 134, member C		15	94	Tle4	transducin-like enhancer of split 4 (E(sp1) homolog, Drosophila)		92	81	Xpnpep2	X-prolyl aminopeptidase (aminopeptidase P) 2, membrane-bound		64	81	Eprs	glutamyl-prolyl-tRNA synthetase		10	86	Fam134c	family with sequence similarity 134, member C		10	94	Dstnl1	destrin-like 1							39	91	Brinp3	bone morphogenetic protein/retinoic acid inducible neural-specific 3
11	85	Col4a5	collagen, type IV, alpha 5		11	85	Col4a5	collagen, type IV, alpha 5		11	85	Col4a5	collagen, type IV, alpha 5		16	93	Phip	pleckstrin homology domain interacting protein		93	81	Ptbp3	polypyrimidine tract binding protein 3		65	81	Acvr1	activin A receptor, type I		11	85	Col4a5	collagen, type IV, alpha 5		11	94	Ino80c	INO80 complex subunit C							40	91	Strn3	striatin, calmodulin binding protein 3
12	84	Cbx5	chromobox homolog 5		12	84	Cbx5	chromobox homolog 5		12	84	Cbx5	chromobox homolog 5		17	93	Gpbp1	GC-rich promoter binding protein 1		94	81	Emilin3	elastin microfibril interfacer 3		66	80	RGD1559962	similar to High mobility group protein 2 (HMG-2)		12	84	Cbx5	chromobox homolog 5		12	94	Pigv	phosphatidylinositol glycan anchor biosynthesis, class V							41	90	Golga3	golgin A3
13	84	Synj1	synaptojanin 1		13	84	Synj1	synaptojanin 1		13	84	Synj1	synaptojanin 1		18	93	Rmnd5a	required for meiotic nuclear division 5 homolog A (S. cerevisiae)		95	80	Fndc3a	fibronectin type III domain containing 3a		1	100	Nfkbiz	nuclear factor of kappa light polypeptide gene enhancer in B-cells inhibitor, zeta		13	84	Synj1	synaptojanin 1		13	93	Plcxd2	phosphatidylinositol-specific phospholipase C, X domain containing 2							42	90	Ube2d2	ubiquitin-conjugating enzyme E2D 2
14	84	Peli2	pellino E3 ubiquitin protein ligase family member 2		14	84	Peli2	pellino E3 ubiquitin protein ligase family member 2		14	84	Peli2	pellino E3 ubiquitin protein ligase family member 2		19	93	Tdg	thymine-DNA glycosylase		96	80	Pbrm1	polybromo 1		2	97	Kpna3	karyopherin alpha 3		14	84	Peli2	pellino E3 ubiquitin protein ligase family member 2		14	93	Ubash3b	ubiquitin associated and SH3 domain containing, B							43	90	Pum2	pumilio RNA-binding family member 2
15	82	Sptlc1	serine palmitoyltransferase, long chain base subunit 1		15	82	Sptlc1	serine palmitoyltransferase, long chain base subunit 1		15	82	Sptlc1	serine palmitoyltransferase, long chain base subunit 1		20	93	Sertad2	SERTA domain containing 2		97	80	Eps15	epidermal growth factor receptor pathway substrate 15		3	95	Mbnl3	muscleblind-like splicing regulator 3		15	82	Sptlc1	serine palmitoyltransferase, long chain base subunit 1		15	93	Fam53b	family with sequence similarity 53, member B							44	89	Ugt2b1	UDP glucuronosyltransferase 2 family, polypeptide B1
16	82	RGD1562726	similar to Putative protein C21orf62 homolog		16	82	RGD1562726	similar to Putative protein C21orf62 homolog		16	82	RGD1562726	similar to Putative protein C21orf62 homolog		21	92	Grid2	glutamate receptor, ionotropic, delta 2		98	80	Fktn	fukutin		4	94	Smarce1	SWI/SNF related, matrix associated, actin dependent regulator of chromatin, subfamily e, member 1		16	82	RGD1562726	similar to Putative protein C21orf62 homolog		16	93	Wdr48	WD repeat domain 48							45	89	Zfp148	zinc finger protein 148
17	81	Nyap2	neuronal tyrosine-phosphorylated phosphoinositide-3-kinase adaptor 2		17	81	Nyap2	neuronal tyrosine-phosphorylated phosphoinositide-3-kinase adaptor 2		17	81	Nyap2	neuronal tyrosine-phosphorylated phosphoinositide-3-kinase adaptor 2		22	92	Scara5	scavenger receptor class A, member 5 (putative)		99	80	Canx	calnexin		5	94	Hivep2	human immunodeficiency virus type I enhancer binding protein 2		17	81	Nyap2	neuronal tyrosine-phosphorylated phosphoinositide-3-kinase adaptor 2		17	93	Tifab	TRAF-interacting protein with forkhead-associated domain, family member B							46	89	Ubxn2b	UBX domain protein 2B
18	80	Ocrl	oculocerebrorenal syndrome of Lowe		18	80	Ocrl	oculocerebrorenal syndrome of Lowe		18	80	Ocrl	oculocerebrorenal syndrome of Lowe		23	92	Thumpd3	THUMP domain containing 3		100	80	Cbx7	chromobox homolog 7		6	94	Rps6ka6	ribosomal protein S6 kinase polypeptide 6		18	80	Ocrl	oculocerebrorenal syndrome of Lowe		18	93	Abhd14a	abhydrolase domain containing 14A							47	88	Thbs2	thrombospondin 2
19	80	F2r	coagulation factor II (thrombin) receptor		19	80	F2r	coagulation factor II (thrombin) receptor		19	80	F2r	coagulation factor II (thrombin) receptor		24	91	LOC100361535	hypothetical LOC100361535		1	100	Tshz3	teashirt zinc finger homeobox 3		7	92	Trip4	thyroid hormone receptor interactor 4		19	80	F2r	coagulation factor II (thrombin) receptor		19	92	Tmem132d	transmembrane protein 132D							48	88	Ppapdc1b	phosphatidic acid phosphatase type 2 domain containing 1B
20	80	Uba6	ubiquitin-like modifier activating enzyme 6		20	80	Uba6	ubiquitin-like modifier activating enzyme 6		20	80	Uba6	ubiquitin-like modifier activating enzyme 6		25	91	Trps1	trichorhinophalangeal syndrome I		2	98	Fam46a	family with sequence similarity 46, member A		8	89	Ranbp1	RAN binding protein 1		20	80	Uba6	ubiquitin-like modifier activating enzyme 6		20	92	Zbtb5	zinc finger and BTB domain containing 5							49	88	Ptpn4	protein tyrosine phosphatase, non-receptor type 4
21	80	Zic3	Zic family member 3		21	80	Zic3	Zic family member 3		21	80	Zic3	Zic family member 3		26	91	Fgd5	FYVE, RhoGEF and PH domain containing 5		3	98	Rapgef2	Rap guanine nucleotide exchange factor (GEF) 2		9	88	Hiat1	hippocampus abundant transcript 1		21	80	Zic3	Zic family member 3		21	92	Brsk2	BR serine/threonine kinase 2							50	88	Kmt2e	lysine (K)-specific methyltransferase 2E
1	100	Pard6b	par-6 family cell polarity regulator beta		1	99	Cpeb2	cytoplasmic polyadenylation element binding protein 2		1	99	Cpeb2	cytoplasmic polyadenylation element binding protein 2		27	90	Ippk	inositol 1,3,4,5,6-pentakisphosphate 2-kinase		4	98	Zdhhc23	zinc finger, DHHC-type containing 23		10	88	Ctdspl2	CTD (carboxy-terminal domain, RNA polymerase II, polypeptide A) small phosphatase like 2		1	99	Cpeb2	cytoplasmic polyadenylation element binding protein 2		22	92	Fbxo41	F-box protein 41							51	88	Ccnj	cyclin J
2	99	Abhd3	abhydrolase domain containing 3		2	99	Terf1	telomeric repeat binding factor (NIMA-interacting) 1		2	99	Terf1	telomeric repeat binding factor (NIMA-interacting) 1		28	90	Cpsf7	cleavage and polyadenylation specific factor 7		5	98	Nfat5	nuclear factor of activated T-cells 5, tonicity-responsive		11	87	Naaa	N-acylethanolamine acid amidase		2	99	Terf1	telomeric repeat binding factor (NIMA-interacting) 1		23	92	Svep1	sushi, von Willebrand factor type A, EGF and pentraxin domain containing 1							52	87	Prepl	prolyl endopeptidase-like
3	99	Gli2	GLI family zinc finger 2		3	99	St18	suppression of tumorigenicity 18		3	99	St18	suppression of tumorigenicity 18		29	90	Kcnk10	potassium channel, subfamily K, member 10		6	98	Sbno1	strawberry notch homolog 1 (Drosophila)		12	87	Yipf5	Yip1 domain family, member 5		3	99	St18	suppression of tumorigenicity 18		24	91	Prkcb	protein kinase C, beta							53	87	Slc2a13	solute carrier family 2 (facilitated glucose transporter), member 13
4	98	Esyt2	extended synaptotagmin-like protein 2		4	97	Grk5	G protein-coupled receptor kinase 5		4	97	Grk5	G protein-coupled receptor kinase 5		30	90	2017-09-07	septin 7		7	98	Gpr85	G protein-coupled receptor 85		13	87	Syncrip	synaptotagmin binding, cytoplasmic RNA interacting protein		4	97	Grk5	G protein-coupled receptor kinase 5		25	91	Lrtm2	leucine-rich repeats and transmembrane domains 2							54	87	St7l	suppression of tumorigenicity 7-like
5	98	Plekha1	pleckstrin homology domain containing, family A (phosphoinositide binding specific) member 1		5	97	Akap10	A kinase (PRKA) anchor protein 10		5	97	Akap10	A kinase (PRKA) anchor protein 10		31	89	Pik3cb	phosphatidylinositol-4,5-bisphosphate 3-kinase, catalytic subunit beta		8	98	Zfp513	zinc finger protein 513		14	87	Hmgn2	high mobility group nucleosome binding domain 2		5	97	Akap10	A kinase (PRKA) anchor protein 10		26	91	Sephs1	selenophosphate synthetase 1							55	87	Echdc1	enoyl CoA hydratase domain containing 1
6	97	Vcp	valosin-containing protein		6	97	Zfp770	zinc finger protein 770		6	97	Zfp770	zinc finger protein 770		32	89	Esm1	endothelial cell-specific molecule 1		9	97	Yy1	YY1 transcription factor		15	85	RGD1563325	similar to hypothetical protein MGC17943		6	97	Zfp770	zinc finger protein 770		27	91	Nell2	NEL-like 2 (chicken)							56	86	Arhgap5	Rho GTPase activating protein 5
7	97	Adamts17	ADAM metallopeptidase with thrombospondin type 1 motif, 17		7	97	Snca	synuclein, alpha (non A4 component of amyloid precursor)		7	97	Snca	synuclein, alpha (non A4 component of amyloid precursor)		33	89	Bmp2	bone morphogenetic protein 2		10	97	Tmem52b	transmembrane protein 52B		16	84	Ispd	isoprenoid synthase domain containing		7	97	Snca	synuclein, alpha (non A4 component of amyloid precursor)		28	90	Mdga2	MAM domain containing glycosylphosphatidylinositol anchor 2							57	86	Bloc1s6	biogenesis of lysosomal organelles complex-1, subunit 6, pallidin
8	97	Cd55	Cd55 molecule		8	97	Slc4a7	solute carrier family 4, sodium bicarbonate cotransporter, member 7		8	97	Slc4a7	solute carrier family 4, sodium bicarbonate cotransporter, member 7		34	88	Galnt3	UDP-N-acetyl-alpha-D-galactosamine:polypeptide N-acetylgalactosaminyltransferase 3 (GalNAc-T3)		11	97	Nucks1	nuclear casein kinase and cyclin-dependent kinase substrate 1		17	84	Ubn2	ubinuclein 2		8	97	Slc4a7	solute carrier family 4, sodium bicarbonate cotransporter, member 7		29	90	Prrg3	proline rich Gla (G-carboxyglutamic acid) 3 (transmembrane)							58	86	Rb1cc1	RB1-inducible coiled-coil 1
9	97	Naa30	N(alpha)-acetyltransferase 30, NatC catalytic subunit		9	97	Ric3	RIC3 acetylcholine receptor chaperone		9	97	Ric3	RIC3 acetylcholine receptor chaperone		35	88	Gria2	glutamate receptor, ionotropic, AMPA 2		12	97	Prpf4b	pre-mRNA processing factor 4B		18	83	Ccnc	cyclin C		9	97	Ric3	RIC3 acetylcholine receptor chaperone		30	90	Rock1	Rho-associated coiled-coil containing protein kinase 1							59	85	Edem3	ER degradation enhancer, mannosidase alpha-like 3
10	95	Kcnab1	potassium voltage-gated channel, shaker-related subfamily, beta member 1		10	96	Nfya	nuclear transcription factor-Y alpha		10	96	Nfya	nuclear transcription factor-Y alpha		36	88	Csn2	casein beta		13	96	Suclg2	succinate-CoA ligase, GDP-forming, beta subunit		19	83	Sybu	syntabulin (syntaxin-interacting)		10	96	Nfya	nuclear transcription factor-Y alpha		31	89	Bzw1	basic leucine zipper and W2 domains 1							60	85	LOC100909825	probable isocitrate dehydrogenase [NAD] gamma 2, mitochondrial-like
11	95	Creb1	cAMP responsive element binding protein 1		11	95	Sgpp1	sphingosine-1-phosphate phosphatase 1		11	95	Sgpp1	sphingosine-1-phosphate phosphatase 1		37	88	Rala	v-ral simian leukemia viral oncogene homolog A (ras related)		14	96	Mtdh	metadherin		20	81	Cul3	cullin 3		11	95	Sgpp1	sphingosine-1-phosphate phosphatase 1		32	89	Vps37b	vacuolar protein sorting 37 homolog B (S. cerevisiae)							61	85	Lrrc55	leucine rich repeat containing 55
12	94	Eya4	eyes absent homolog 4 (Drosophila)		12	94	Gabrb2	gamma-aminobutyric acid (GABA) A receptor, beta 2		12	94	Gabrb2	gamma-aminobutyric acid (GABA) A receptor, beta 2		38	88	Supt20	suppressor of Ty 20		15	96	Nfatc3	nuclear factor of activated T-cells, cytoplasmic, calcineurin-dependent 3		21	81	Rictor	RPTOR independent companion of MTOR, complex 2		12	94	Gabrb2	gamma-aminobutyric acid (GABA) A receptor, beta 2		33	89	Sema4c	sema domain, immunoglobulin domain (Ig), transmembrane domain (TM) and short cytoplasmic domain, (semaphorin) 4C							62	85	Enc1	ectodermal-neural cortex 1
13	94	Atp1b3	ATPase, Na+/K+ transporting, beta 3 polypeptide		13	94	Kctd13	potassium channel tetramerization domain containing 13		13	94	Kctd13	potassium channel tetramerization domain containing 13		39	87	Aldh3b2	aldehyde dehydrogenase 3 family, member B2		16	95	Dpysl2	dihydropyrimidinase-like 2		22	81	Ppp2r3a	protein phosphatase 2, regulatory subunit B'', alpha		13	94	Kctd13	potassium channel tetramerization domain containing 13		34	88	Cdk6	cyclin-dependent kinase 6							63	85	Fam84b	family with sequence similarity 84, member B
14	94	Rimklb	ribosomal modification protein rimK-like family member B		14	94	Pdpk1	3-phosphoinositide dependent protein kinase-1		14	94	Pdpk1	3-phosphoinositide dependent protein kinase-1		40	87	LOC688778	similar to fatty aldehyde dehydrogenase-like		17	95	Kbtbd8	kelch repeat and BTB (POZ) domain containing 8		23	80	Pou2f1	POU class 2 homeobox 1		14	94	Pdpk1	3-phosphoinositide dependent protein kinase-1		35	88	Trpm7	transient receptor potential cation channel, subfamily M, member 7							64	85	Cdan1	codanin 1
15	93	Prkacb	protein kinase, cAMP dependent, catalytic, beta		15	93	Ndufaf4	NADH dehydrogenase (ubiquinone) complex I, assembly factor 4		15	93	Ndufaf4	NADH dehydrogenase (ubiquinone) complex I, assembly factor 4		41	87	Sp3	Sp3 transcription factor		18	95	Ide	insulin degrading enzyme		24	80	Clcn3	chloride channel, voltage-sensitive 3		15	93	Ndufaf4	NADH dehydrogenase (ubiquinone) complex I, assembly factor 4		36	88	Ube2g2	ubiquitin-conjugating enzyme E2G 2							65	84	Dusp18	dual specificity phosphatase 18
16	93	Sync	syncoilin, intermediate filament protein		16	93	Dpys	dihydropyrimidinase		16	93	Dpys	dihydropyrimidinase		42	87	Orc1	origin recognition complex, subunit 1		19	95	RGD1309079	similar to Ab2-095		1	100	Man2a1	mannosidase, alpha, class 2A, member 1		16	93	Dpys	dihydropyrimidinase		37	88	Myo6	myosin VI							66	84	Ca1	carbonic anhydrase I
17	92	Pkia	protein kinase (cAMP-dependent, catalytic) inhibitor alpha		17	92	RGD1309748	similar to CG4768-PA		17	92	RGD1309748	similar to CG4768-PA		43	87	Ppp6c	protein phosphatase 6, catalytic subunit		20	95	Gpcpd1	glycerophosphocholine phosphodiesterase GDE1 homolog (S. cerevisiae)		2	100	Elovl5	ELOVL fatty acid elongase 5		17	92	RGD1309748	similar to CG4768-PA		38	88	Csf3r	colony stimulating factor 3 receptor (granulocyte)							67	84	Mtmr3	myotubularin related protein 3
18	92	Pcdh9	protocadherin 9		18	91	Ptprf	protein tyrosine phosphatase, receptor type, F		18	91	Ptprf	protein tyrosine phosphatase, receptor type, F		44	87	Nkiras1	NFKB inhibitor interacting Ras-like 1		21	95	Ier5	immediate early response 5		3	100	Hipk1	homeodomain interacting protein kinase 1		18	91	Ptprf	protein tyrosine phosphatase, receptor type, F		39	87	Pklr	pyruvate kinase, liver and RBC							68	84	LOC102551035	serine/arginine repetitive matrix protein 4-like
19	92	Trappc8	trafficking protein particle complex 8		19	91	Cmpk1	cytidine monophosphate (UMP-CMP) kinase 1		19	91	Cmpk1	cytidine monophosphate (UMP-CMP) kinase 1		45	87	Pura	purine rich element binding protein A		22	95	Med13	mediator complex subunit 13		4	99	Hectd1	HECT domain containing E3 ubiquitin protein ligase 1		19	91	Cmpk1	cytidine monophosphate (UMP-CMP) kinase 1		40	87	Mier1	mesoderm induction early response 1, transcriptional regulator							69	84	Ago1	argonaute RISC catalytic component 1
20	91	Lpgat1	lysophosphatidylglycerol acyltransferase 1		20	91	Cdh5	cadherin 5		20	91	Cdh5	cadherin 5		46	86	Capza1	capping protein (actin filament) muscle Z-line, alpha 1		23	94	Pura	purine rich element binding protein A		5	99	B3galt2	UDP-Gal:betaGlcNAc beta 1,3-galactosyltransferase, polypeptide 2		20	91	Cdh5	cadherin 5		41	87	Pianp	PILR alpha associated neural protein							70	84	Mmgt1	membrane magnesium transporter 1
21	91	Prkcb	protein kinase C, beta		21	91	Rala	v-ral simian leukemia viral oncogene homolog A (ras related)		21	91	Rala	v-ral simian leukemia viral oncogene homolog A (ras related)		47	86	Psmg4	proteasome (prosome, macropain) assembly chaperone 4		24	94	Lats1	large tumor suppressor kinase 1		6	99	Eea1	early endosome antigen 1		21	91	Rala	v-ral simian leukemia viral oncogene homolog A (ras related)		42	87	Kcnk1	potassium channel, subfamily K, member 1							71	84	Rassf4	Ras association (RalGDS/AF-6) domain family member 4
22	91	Klf12	Kruppel-like factor 12		22	90	Unc5d	unc-5 homolog D (C. elegans)		22	90	Unc5d	unc-5 homolog D (C. elegans)		48	86	Whsc1	Wolf-Hirschhorn syndrome candidate 1		25	93	Timm44	translocase of inner mitochondrial membrane 44 homolog (yeast)		7	99	Prrg1	proline rich Gla (G-carboxyglutamic acid) 1		22	90	Unc5d	unc-5 homolog D (C. elegans)		43	87	Slamf1	signaling lymphocytic activation molecule family member 1							72	83	Arhgap42	Rho GTPase activating protein 42
23	90	Fbxl17	F-box and leucine-rich repeat protein 17		23	90	Ptprb	protein tyrosine phosphatase, receptor type, B		23	90	Ptprb	protein tyrosine phosphatase, receptor type, B		49	85	Tgfb2	transforming growth factor, beta 2		26	93	Ezh1	enhancer of zeste homolog 1 (Drosophila)		8	99	Tmem106b	transmembrane protein 106B		23	90	Ptprb	protein tyrosine phosphatase, receptor type, B		44	86	Tvp23a	trans-golgi network vesicle protein 23 homolog A (S. cerevisiae)							73	83	Tc2n	tandem C2 domains, nuclear
24	90	Wwox	WW domain-containing oxidoreductase		24	90	LOC689437	similar to vitamin A-deficient testicular protein 11-like		24	90	LOC689437	similar to vitamin A-deficient testicular protein 11-like		50	85	Slc26a7	solute carrier family 26 (anion exchanger), member 7		27	93	Gabrg2	gamma-aminobutyric acid (GABA) A receptor, gamma 2		9	98	LOC681410	hypothetical protein LOC681410		24	90	LOC689437	similar to vitamin A-deficient testicular protein 11-like		45	86	RGD1565712	similar to Hypothetical protein MGC59495							74	83	RGD1565058	similar to RIKEN cDNA 1700019M22
25	89	Mtpap	mitochondrial poly(A) polymerase		25	90	Ccdc43	coiled-coil domain containing 43		25	90	Ccdc43	coiled-coil domain containing 43		51	84	Sh3rf3	SH3 domain containing ring finger 3		28	93	Cpeb4	cytoplasmic polyadenylation element binding protein 4		10	98	Zfp189	zinc finger protein 189		25	90	Ccdc43	coiled-coil domain containing 43		46	86	S100vp	S100 calcium-binding protein, ventral prostate							75	83	Cbfa2t2	core-binding factor, runt domain, alpha subunit 2; translocated to, 2
26	89	Slc17a2	solute carrier family 17, member 2		26	89	Ccar1	cell division cycle and apoptosis regulator 1		26	89	Ccar1	cell division cycle and apoptosis regulator 1		52	84	Kat6a	K(lysine) acetyltransferase 6A		29	93	Zdhhc3	zinc finger, DHHC-type containing 3		11	98	Chic1	cysteine-rich hydrophobic domain 1		26	89	Ccar1	cell division cycle and apoptosis regulator 1		47	86	RGD1304694	similar to CG9646-PA							76	83	Hsd11b2	hydroxysteroid 11-beta dehydrogenase 2
27	88	Lrrc8c	leucine rich repeat containing 8 family, member C		27	89	Acnat2	acyl-coenzyme A amino acid N-acyltransferase 2		27	89	Acnat2	acyl-coenzyme A amino acid N-acyltransferase 2		53	84	Slc12a6	solute carrier family 12, member 6		30	93	Rngtt	RNA guanylyltransferase and 5'-phosphatase		12	98	Rest	RE1-silencing transcription factor		27	89	Acnat2	acyl-coenzyme A amino acid N-acyltransferase 2		48	86	Kctd20	potassium channel tetramerization domain containing 20							77	83	Robo2	roundabout, axon guidance receptor, homolog 2 (Drosophila)
28	88	Cdh8	cadherin 8		28	88	Rab6a	RAB6A, member RAS oncogene family		28	88	Rab6a	RAB6A, member RAS oncogene family		54	84	Man1a2	mannosidase, alpha, class 1A, member 2		31	93	Kcnh7	potassium voltage-gated channel, subfamily H (eag-related), member 7		13	98	Ing2	inhibitor of growth family, member 2		28	88	Rab6a	RAB6A, member RAS oncogene family		49	85	Mamdc4	MAM domain containing 4							78	83	Ncoa7	nuclear receptor coactivator 7
29	88	Magi3	membrane associated guanylate kinase, WW and PDZ domain containing 3		29	88	Slc5a7	solute carrier family 5 (sodium/choline cotransporter), member 7		29	88	Slc5a7	solute carrier family 5 (sodium/choline cotransporter), member 7		55	84	Tor1b	torsin family 1, member B		32	92	Vamp4	vesicle-associated membrane protein 4		14	97	Acsl4	acyl-CoA synthetase long-chain family member 4		29	88	Slc5a7	solute carrier family 5 (sodium/choline cotransporter), member 7		50	85	Avl9	AVL9 homolog (S. cerevisiase)							79	83	LOC102546630	protein gar2-like
30	86	Myo1d	myosin ID		30	87	Pmch	pro-melanin-concentrating hormone		30	87	Pmch	pro-melanin-concentrating hormone		56	83	Il11	interleukin 11		33	92	Epha7	Eph receptor A7		15	97	Grem1	gremlin 1		30	87	Pmch	pro-melanin-concentrating hormone		51	85	Tacr2	tachykinin receptor 2							80	83	LOC102557159	protein gar2-like
31	86	Utrn	utrophin		31	87	Rock2	Rho-associated coiled-coil containing protein kinase 2		31	87	Rock2	Rho-associated coiled-coil containing protein kinase 2		57	83	Eif4a3	eukaryotic translation initiation factor 4A3		34	92	Vgll4	vestigial like 4 (Drosophila)		16	97	Mtch2	mitochondrial carrier 2		31	87	Rock2	Rho-associated coiled-coil containing protein kinase 2		52	84	Mrvi1	murine retrovirus integration site 1 homolog							81	82	Slc26a6	solute carrier family 26 (anion exchanger), member 6
32	86	2017-03-05	membrane-associated ring finger (C3HC4) 5		32	87	Rai1	retinoic acid induced 1		32	87	Rai1	retinoic acid induced 1		58	83	Cgrrf1	cell growth regulator with ring finger domain 1		35	92	Sirt7	sirtuin 7		17	97	Rnf44	ring finger protein 44		32	87	Rai1	retinoic acid induced 1		53	84	Nhsl1	NHS-like 1							82	82	Rhoa	ras homolog family member A
33	86	Sema3d	sema domain, immunoglobulin domain (Ig), short basic domain, secreted, (semaphorin) 3D		33	86	Bcl11a	B-cell CLL/lymphoma 11A (zinc finger protein)		33	86	Bcl11a	B-cell CLL/lymphoma 11A (zinc finger protein)		59	83	RGD1308601	similar to hypothetical protein		36	91	Kctd6	potassium channel tetramerization domain containing 6		18	97	Dpyd	dihydropyrimidine dehydrogenase		33	86	Bcl11a	B-cell CLL/lymphoma 11A (zinc finger protein)		54	84	LOC102557522	pollen-specific leucine-rich repeat extensin-like protein 3-like							83	82	Arl13b	ADP-ribosylation factor-like 13B
34	85	Helz	helicase with zinc finger		34	86	Fam196a	family with sequence similarity 196, member A		34	86	Fam196a	family with sequence similarity 196, member A		60	83	Thbs2	thrombospondin 2		37	91	LOC100909688	zinc finger protein 43-like		19	96	Snap25	synaptosomal-associated protein 25		34	86	Fam196a	family with sequence similarity 196, member A		55	84	Adam12	ADAM metallopeptidase domain 12							84	82	Klhl32	kelch-like family member 32
35	85	Rin2	Ras and Rab interactor 2		35	85	Rad23b	RAD23 homolog B (S. cerevisiae)		35	85	Rad23b	RAD23 homolog B (S. cerevisiae)		61	82	Mesdc1	mesoderm development candidate 1		38	91	Capn6	calpain 6		20	96	Arl14ep	ADP-ribosylation factor-like 14 effector protein		35	85	Rad23b	RAD23 homolog B (S. cerevisiae)		56	84	Dhdds	dehydrodolichyl diphosphate synthase							85	82	Igf2bp1	insulin-like growth factor 2 mRNA binding protein 1
36	85	Vps4b	vacuolar protein sorting 4 homolog B (S. cerevisiae)		36	85	Arpc1b	actin related protein 2/3 complex, subunit 1B		36	85	Arpc1b	actin related protein 2/3 complex, subunit 1B		62	82	Erg	v-ets avian erythroblastosis virus E26 oncogene		39	91	Brinp3	bone morphogenetic protein/retinoic acid inducible neural-specific 3		21	96	Slitrk2	SLIT and NTRK-like family, member 2		36	85	Arpc1b	actin related protein 2/3 complex, subunit 1B		57	84	Lmf1	lipase maturation factor 1							86	81	Epb41l1	erythrocyte membrane protein band 4.1-like 1
37	85	Ube2e3	ubiquitin-conjugating enzyme E2E 3		37	83	Hs2st1	heparan sulfate 2-O-sulfotransferase 1		37	83	Hs2st1	heparan sulfate 2-O-sulfotransferase 1		63	82	Fpgt	fucose-1-phosphate guanylyltransferase		40	91	Strn3	striatin, calmodulin binding protein 3		22	96	Dip2c	DIP2 disco-interacting protein 2 homolog C (Drosophila)		37	83	Hs2st1	heparan sulfate 2-O-sulfotransferase 1		58	83	Xylt1	xylosyltransferase 1							87	81	Herpud1	homocysteine-inducible, endoplasmic reticulum stress-inducible, ubiquitin-like domain member 1
38	85	Mef2c	myocyte enhancer factor 2C		38	83	Fv1	Friend virus susceptibility 1		38	83	Fv1	Friend virus susceptibility 1		64	81	Zfp287	zinc finger protein 287		41	90	Golga3	golgin A3		23	95	Smoc2	SPARC related modular calcium binding 2		38	83	Fv1	Friend virus susceptibility 1		59	83	Tmx4	thioredoxin-related transmembrane protein 4							88	81	Pip4k2b	phosphatidylinositol-5-phosphate 4-kinase, type II, beta
39	85	Hipk3	homeodomain interacting protein kinase 3		39	82	Arpc5	actin related protein 2/3 complex, subunit 5		39	82	Arpc5	actin related protein 2/3 complex, subunit 5		65	81	Atp1b4	ATPase, (Na+)/K+ transporting, beta 4 polypeptide		42	90	Ube2d2	ubiquitin-conjugating enzyme E2D 2		24	95	Abca5	ATP-binding cassette, subfamily A (ABC1), member 5		39	82	Arpc5	actin related protein 2/3 complex, subunit 5		60	83	Dync1li2	dynein, cytoplasmic 1 light intermediate chain 2							89	81	Btrc	beta-transducin repeat containing E3 ubiquitin protein ligase
40	84	Cops7b	COP9 signalosome subunit 7B		40	82	Hdhd2	haloacid dehalogenase-like hydrolase domain containing 2		40	82	Hdhd2	haloacid dehalogenase-like hydrolase domain containing 2		66	81	Depdc1b	DEP domain containing 1B		43	90	Pum2	pumilio RNA-binding family member 2		25	95	Sucla2	succinate-CoA ligase, ADP-forming, beta subunit		40	82	Hdhd2	haloacid dehalogenase-like hydrolase domain containing 2		61	83	Ptpn7	protein tyrosine phosphatase, non-receptor type 7							90	81	Rap1b	RAP1B, member of RAS oncogene family
41	84	Abi3bp	ABI family, member 3 (NESH) binding protein		41	82	LOC687465	hypothetical protein LOC687465		41	82	LOC687465	hypothetical protein LOC687465		67	81	Xrcc5	X-ray repair complementing defective repair in Chinese hamster cells 5		44	89	Ugt2b1	UDP glucuronosyltransferase 2 family, polypeptide B1		26	95	Zfyve16	zinc finger, FYVE domain containing 16		41	82	LOC687465	hypothetical protein LOC687465		62	83	Dmbt1	deleted in malignant brain tumors 1							91	81	Fa2h	fatty acid 2-hydroxylase
42	84	Arrdc3	arrestin domain containing 3		42	82	Ryr2	ryanodine receptor 2, cardiac		42	82	Ryr2	ryanodine receptor 2, cardiac		68	81	Pnrc1	proline-rich nuclear receptor coactivator 1		45	89	Zfp148	zinc finger protein 148		27	95	Stxbp5	syntaxin binding protein 5 (tomosyn)		42	82	Ryr2	ryanodine receptor 2, cardiac		63	83	LOC100911413	deleted in malignant brain tumors 1 protein-like							92	81	Xpnpep2	X-prolyl aminopeptidase (aminopeptidase P) 2, membrane-bound
43	83	Kif14	kinesin family member 14		43	82	Otud4	OTU domain containing 4		43	82	Otud4	OTU domain containing 4		69	81	Txlng	taxilin gamma		46	89	Ubxn2b	UBX domain protein 2B		28	94	Ints2	integrator complex subunit 2		43	82	Otud4	OTU domain containing 4		64	83	Zfp710	zinc finger protein 710							93	81	Ptbp3	polypyrimidine tract binding protein 3
44	83	Gnrhr	gonadotropin releasing hormone receptor		44	81	Sh3bgrl	SH3 domain binding glutamic acid-rich protein like		44	81	Sh3bgrl	SH3 domain binding glutamic acid-rich protein like		70	81	Adam22	ADAM metallopeptidase domain 22		47	88	Thbs2	thrombospondin 2		29	94	RGD1311345	similar to CG9752-PA		44	81	Sh3bgrl	SH3 domain binding glutamic acid-rich protein like		65	83	RGD1562234	similar to S100 calcium-binding protein, ventral prostate							94	81	Emilin3	elastin microfibril interfacer 3
45	83	Ptprj	protein tyrosine phosphatase, receptor type, J		45	81	Dnajc21	DnaJ (Hsp40) homolog, subfamily C, member 21		45	81	Dnajc21	DnaJ (Hsp40) homolog, subfamily C, member 21		71	80	Gtf2b	general transcription factor IIB		48	88	Ppapdc1b	phosphatidic acid phosphatase type 2 domain containing 1B		30	94	Lphn3	latrophilin 3		45	81	Dnajc21	DnaJ (Hsp40) homolog, subfamily C, member 21		66	83	Abca9	ATP-binding cassette, subfamily A (ABC1), member 9							95	80	Fndc3a	fibronectin type III domain containing 3a
46	83	Wdr26	WD repeat domain 26		46	81	Cbfb	core-binding factor, beta subunit		46	81	Cbfb	core-binding factor, beta subunit		72	80	Avl9	AVL9 homolog (S. cerevisiase)		49	88	Ptpn4	protein tyrosine phosphatase, non-receptor type 4		31	94	Cldn10	claudin 10		46	81	Cbfb	core-binding factor, beta subunit		67	82	Map2k1	mitogen activated protein kinase kinase 1							96	80	Pbrm1	polybromo 1
47	82	Stag2	stromal antigen 2		47	81	Bnip2	BCL2/adenovirus E1B interacting protein 2		47	81	Bnip2	BCL2/adenovirus E1B interacting protein 2		1	99	Cpeb2	cytoplasmic polyadenylation element binding protein 2		50	88	Kmt2e	lysine (K)-specific methyltransferase 2E		32	94	Stag2	stromal antigen 2		47	81	Bnip2	BCL2/adenovirus E1B interacting protein 2		68	82	Tnfaip1	tumor necrosis factor, alpha-induced protein 1 (endothelial)							97	80	Eps15	epidermal growth factor receptor pathway substrate 15
48	82	Kctd21	potassium channel tetramerization domain containing 21		48	81	Exoc3	exocyst complex component 3		48	81	Exoc3	exocyst complex component 3		2	99	Terf1	telomeric repeat binding factor (NIMA-interacting) 1		51	88	Ccnj	cyclin J		33	94	Akap9	A kinase (PRKA) anchor protein 9		48	81	Exoc3	exocyst complex component 3		69	82	Ptcd1	pentatricopeptide repeat domain 1							98	80	Fktn	fukutin
49	81	Fcgr2b	Fc fragment of IgG, low affinity IIb, receptor (CD32)		49	81	Hnrnpu	heterogeneous nuclear ribonucleoprotein U		49	81	Hnrnpu	heterogeneous nuclear ribonucleoprotein U		3	99	St18	suppression of tumorigenicity 18		52	87	Prepl	prolyl endopeptidase-like		34	94	Stx17	syntaxin 17		49	81	Hnrnpu	heterogeneous nuclear ribonucleoprotein U		70	81	Gtlf3b	gene trap locus F3b							99	80	Canx	calnexin
50	80	Tjp1	tight junction protein 1		50	80	R3hdm1	R3H domain containing 1		50	80	R3hdm1	R3H domain containing 1		4	97	Grk5	G protein-coupled receptor kinase 5		53	87	Slc2a13	solute carrier family 2 (facilitated glucose transporter), member 13		35	94	Zmynd11	zinc finger, MYND-type containing 11		50	80	R3hdm1	R3H domain containing 1		71	81	Harbi1	harbinger transposase derived 1							100	80	Cbx7	chromobox homolog 7
51	80	Errfi1	ERBB receptor feedback inhibitor 1		51	80	Pura	purine rich element binding protein A		51	80	Pura	purine rich element binding protein A		5	97	Akap10	A kinase (PRKA) anchor protein 10		54	87	St7l	suppression of tumorigenicity 7-like		36	93	Emp2	epithelial membrane protein 2		51	80	Pura	purine rich element binding protein A		72	81	Sorbs3	sorbin and SH3 domain containing 3							1	100	Nfkbiz	nuclear factor of kappa light polypeptide gene enhancer in B-cells inhibitor, zeta
1	99	Cpeb2	cytoplasmic polyadenylation element binding protein 2		52	80	Gpr158	G protein-coupled receptor 158		52	80	Gpr158	G protein-coupled receptor 158		6	97	Zfp770	zinc finger protein 770		55	87	Echdc1	enoyl CoA hydratase domain containing 1		37	93	Appl1	adaptor protein, phosphotyrosine interaction, PH domain and leucine zipper containing 1		52	80	Gpr158	G protein-coupled receptor 158		73	81	LOC102552271	uncharacterized LOC102552271							2	97	Kpna3	karyopherin alpha 3
2	99	Terf1	telomeric repeat binding factor (NIMA-interacting) 1		53	80	Gltscr1l	GLTSCR1-like		53	80	Gltscr1l	GLTSCR1-like		7	97	Snca	synuclein, alpha (non A4 component of amyloid precursor)		56	86	Arhgap5	Rho GTPase activating protein 5		38	93	Fam175b	family with sequence similarity 175, member B		53	80	Gltscr1l	GLTSCR1-like		74	81	LOC102556744	uncharacterized LOC102556744							3	95	Mbnl3	muscleblind-like splicing regulator 3
3	99	St18	suppression of tumorigenicity 18		1	100	Arid2	AT rich interactive domain 2 (Arid-rfx like)		1	100	Arid2	AT rich interactive domain 2 (Arid-rfx like)		8	97	Slc4a7	solute carrier family 4, sodium bicarbonate cotransporter, member 7		57	86	Bloc1s6	biogenesis of lysosomal organelles complex-1, subunit 6, pallidin		39	93	Ahcyl1	adenosylhomocysteinase-like 1		1	100	Arid2	AT rich interactive domain 2 (Arid-rfx like)		75	81	Ppp1r12c	protein phosphatase 1, regulatory subunit 12C							4	94	Smarce1	SWI/SNF related, matrix associated, actin dependent regulator of chromatin, subfamily e, member 1
4	97	Grk5	G protein-coupled receptor kinase 5		2	99	Nfia	nuclear factor I/A		2	99	Nfia	nuclear factor I/A		9	97	Ric3	RIC3 acetylcholine receptor chaperone		58	86	Rb1cc1	RB1-inducible coiled-coil 1		40	93	RGD1309079	similar to Ab2-095		2	99	Nfia	nuclear factor I/A		76	80	Txndc17	thioredoxin domain containing 17							5	94	Hivep2	human immunodeficiency virus type I enhancer binding protein 2
5	97	Akap10	A kinase (PRKA) anchor protein 10		3	99	Xrn1	5'-3' exoribonuclease 1		3	99	Xrn1	5'-3' exoribonuclease 1		10	96	Nfya	nuclear transcription factor-Y alpha		59	85	Edem3	ER degradation enhancer, mannosidase alpha-like 3		41	93	Zfand6	zinc finger, AN1-type domain 6		3	99	Xrn1	5'-3' exoribonuclease 1		77	80	Slc35e2b	solute carrier family 35, member E2B							6	94	Rps6ka6	ribosomal protein S6 kinase polypeptide 6
6	97	Zfp770	zinc finger protein 770		4	99	Bmpr2	bone morphogenetic protein receptor, type II (serine/threonine kinase)		4	99	Bmpr2	bone morphogenetic protein receptor, type II (serine/threonine kinase)		11	95	Sgpp1	sphingosine-1-phosphate phosphatase 1		60	85	LOC100909825	probable isocitrate dehydrogenase [NAD] gamma 2, mitochondrial-like		42	92	Rhobtb1	Rho-related BTB domain containing 1		4	99	Bmpr2	bone morphogenetic protein receptor, type II (serine/threonine kinase)		78	80	Hic1	hypermethylated in cancer 1							7	92	Trip4	thyroid hormone receptor interactor 4
7	97	Snca	synuclein, alpha (non A4 component of amyloid precursor)		5	98	Gpr116	G protein-coupled receptor 116		5	98	Gpr116	G protein-coupled receptor 116		12	94	Gabrb2	gamma-aminobutyric acid (GABA) A receptor, beta 2		61	85	Lrrc55	leucine rich repeat containing 55		43	92	Gabrb2	gamma-aminobutyric acid (GABA) A receptor, beta 2		5	98	Gpr116	G protein-coupled receptor 116		79	80	Dstn	destrin							8	89	Ranbp1	RAN binding protein 1
8	97	Slc4a7	solute carrier family 4, sodium bicarbonate cotransporter, member 7		6	98	Rab9b	RAB9B, member RAS oncogene family		6	98	Rab9b	RAB9B, member RAS oncogene family		13	94	Kctd13	potassium channel tetramerization domain containing 13		62	85	Enc1	ectodermal-neural cortex 1		44	92	Gramd3	GRAM domain containing 3		6	98	Rab9b	RAB9B, member RAS oncogene family		1	97	Bcor	BCL6 co-repressor							9	88	Hiat1	hippocampus abundant transcript 1
9	97	Ric3	RIC3 acetylcholine receptor chaperone		7	97	Atp2b2	ATPase, Ca++ transporting, plasma membrane 2		7	97	Atp2b2	ATPase, Ca++ transporting, plasma membrane 2		14	94	Pdpk1	3-phosphoinositide dependent protein kinase-1		63	85	Fam84b	family with sequence similarity 84, member B		45	92	Kcmf1	potassium channel modulatory factor 1		7	97	Atp2b2	ATPase, Ca++ transporting, plasma membrane 2		2	96	Slitrk1	SLIT and NTRK-like family, member 1							10	88	Ctdspl2	CTD (carboxy-terminal domain, RNA polymerase II, polypeptide A) small phosphatase like 2
10	96	Nfya	nuclear transcription factor-Y alpha		8	97	Grm3	glutamate receptor, metabotropic 3		8	97	Grm3	glutamate receptor, metabotropic 3		15	93	Ndufaf4	NADH dehydrogenase (ubiquinone) complex I, assembly factor 4		64	85	Cdan1	codanin 1		46	92	Col4a3bp	collagen, type IV, alpha 3 (Goodpasture antigen) binding protein		8	97	Grm3	glutamate receptor, metabotropic 3		3	94	Egfl6	EGF-like-domain, multiple 6							11	87	Naaa	N-acylethanolamine acid amidase
11	95	Sgpp1	sphingosine-1-phosphate phosphatase 1		9	97	Angpt1	angiopoietin 1		9	97	Angpt1	angiopoietin 1		16	93	Dpys	dihydropyrimidinase		65	84	Dusp18	dual specificity phosphatase 18		47	92	Lypla1	lysophospholipase I		9	97	Angpt1	angiopoietin 1		4	93	Phip	pleckstrin homology domain interacting protein							12	87	Yipf5	Yip1 domain family, member 5
12	94	Gabrb2	gamma-aminobutyric acid (GABA) A receptor, beta 2		10	96	Arrdc3	arrestin domain containing 3		10	96	Arrdc3	arrestin domain containing 3		17	92	RGD1309748	similar to CG4768-PA		66	84	Ca1	carbonic anhydrase I		48	92	Ndfip2	Nedd4 family interacting protein 2		10	96	Arrdc3	arrestin domain containing 3		5	92	Pcdh9	protocadherin 9							13	87	Syncrip	synaptotagmin binding, cytoplasmic RNA interacting protein
13	94	Kctd13	potassium channel tetramerization domain containing 13		11	95	Acly	ATP citrate lyase		11	95	Acly	ATP citrate lyase		18	91	Ptprf	protein tyrosine phosphatase, receptor type, F		67	84	Mtmr3	myotubularin related protein 3		49	91	Hmgcll1	3-hydroxymethyl-3-methylglutaryl-CoA lyase-like 1		11	95	Acly	ATP citrate lyase		6	91	Cd53	Cd53 molecule							14	87	Hmgn2	high mobility group nucleosome binding domain 2
14	94	Pdpk1	3-phosphoinositide dependent protein kinase-1		12	94	Ibtk	inhibitor of Bruton agammaglobulinemia tyrosine kinase		12	94	Ibtk	inhibitor of Bruton agammaglobulinemia tyrosine kinase		19	91	Cmpk1	cytidine monophosphate (UMP-CMP) kinase 1		68	84	LOC102551035	serine/arginine repetitive matrix protein 4-like		50	91	Kcnt2	potassium channel, subfamily T, member 2		12	94	Ibtk	inhibitor of Bruton agammaglobulinemia tyrosine kinase		7	88	Stac	SH3 and cysteine rich domain							15	85	RGD1563325	similar to hypothetical protein MGC17943
15	93	Ndufaf4	NADH dehydrogenase (ubiquinone) complex I, assembly factor 4		13	94	Amot	angiomotin		13	94	Amot	angiomotin		20	91	Cdh5	cadherin 5		69	84	Ago1	argonaute RISC catalytic component 1		51	91	Esyt2	extended synaptotagmin-like protein 2		13	94	Amot	angiomotin		8	87	Elavl2	ELAV like neuron-specific RNA binding protein 2							16	84	Ispd	isoprenoid synthase domain containing
16	93	Dpys	dihydropyrimidinase		14	94	Mfsd1	major facilitator superfamily domain containing 1		14	94	Mfsd1	major facilitator superfamily domain containing 1		21	91	Rala	v-ral simian leukemia viral oncogene homolog A (ras related)		70	84	Mmgt1	membrane magnesium transporter 1		52	90	Unc79	unc-79 homolog (C. elegans)		14	94	Mfsd1	major facilitator superfamily domain containing 1		9	87	Klhl28	kelch-like family member 28							17	84	Ubn2	ubinuclein 2
17	92	RGD1309748	similar to CG4768-PA		15	94	Tle4	transducin-like enhancer of split 4 (E(sp1) homolog, Drosophila)		15	94	Tle4	transducin-like enhancer of split 4 (E(sp1) homolog, Drosophila)		22	90	Unc5d	unc-5 homolog D (C. elegans)		71	84	Rassf4	Ras association (RalGDS/AF-6) domain family member 4		53	90	Tbx18	T-box18		15	94	Tle4	transducin-like enhancer of split 4 (E(sp1) homolog, Drosophila)		10	86	Fam134c	family with sequence similarity 134, member C							18	83	Ccnc	cyclin C
18	91	Ptprf	protein tyrosine phosphatase, receptor type, F		16	93	Phip	pleckstrin homology domain interacting protein		16	93	Phip	pleckstrin homology domain interacting protein		23	90	Ptprb	protein tyrosine phosphatase, receptor type, B		72	83	Arhgap42	Rho GTPase activating protein 42		54	90	Map1b	microtubule-associated protein 1B		16	93	Phip	pleckstrin homology domain interacting protein		11	85	Col4a5	collagen, type IV, alpha 5							19	83	Sybu	syntabulin (syntaxin-interacting)
19	91	Cmpk1	cytidine monophosphate (UMP-CMP) kinase 1		17	93	Gpbp1	GC-rich promoter binding protein 1		17	93	Gpbp1	GC-rich promoter binding protein 1		24	90	LOC689437	similar to vitamin A-deficient testicular protein 11-like		73	83	Tc2n	tandem C2 domains, nuclear		55	90	Yipf4	Yip1 domain family, member 4		17	93	Gpbp1	GC-rich promoter binding protein 1		12	84	Cbx5	chromobox homolog 5							20	81	Cul3	cullin 3
20	91	Cdh5	cadherin 5		18	93	Rmnd5a	required for meiotic nuclear division 5 homolog A (S. cerevisiae)		18	93	Rmnd5a	required for meiotic nuclear division 5 homolog A (S. cerevisiae)		25	90	Ccdc43	coiled-coil domain containing 43		74	83	RGD1565058	similar to RIKEN cDNA 1700019M22		56	90	Atp11c	ATPase, class VI, type 11C		18	93	Rmnd5a	required for meiotic nuclear division 5 homolog A (S. cerevisiae)		13	84	Synj1	synaptojanin 1							21	81	Rictor	RPTOR independent companion of MTOR, complex 2
21	91	Rala	v-ral simian leukemia viral oncogene homolog A (ras related)		19	93	Tdg	thymine-DNA glycosylase		19	93	Tdg	thymine-DNA glycosylase		26	89	Ccar1	cell division cycle and apoptosis regulator 1		75	83	Cbfa2t2	core-binding factor, runt domain, alpha subunit 2; translocated to, 2		57	90	Zdhhc20	zinc finger, DHHC-type containing 20		19	93	Tdg	thymine-DNA glycosylase		14	84	Peli2	pellino E3 ubiquitin protein ligase family member 2							22	81	Ppp2r3a	protein phosphatase 2, regulatory subunit B'', alpha
22	90	Unc5d	unc-5 homolog D (C. elegans)		20	93	Sertad2	SERTA domain containing 2		20	93	Sertad2	SERTA domain containing 2		27	89	Acnat2	acyl-coenzyme A amino acid N-acyltransferase 2		76	83	Hsd11b2	hydroxysteroid 11-beta dehydrogenase 2		58	90	Sowahc	sosondowah ankyrin repeat domain family member C		20	93	Sertad2	SERTA domain containing 2		15	82	Sptlc1	serine palmitoyltransferase, long chain base subunit 1							23	80	Pou2f1	POU class 2 homeobox 1
23	90	Ptprb	protein tyrosine phosphatase, receptor type, B		21	92	Grid2	glutamate receptor, ionotropic, delta 2		21	92	Grid2	glutamate receptor, ionotropic, delta 2		28	88	Rab6a	RAB6A, member RAS oncogene family		77	83	Robo2	roundabout, axon guidance receptor, homolog 2 (Drosophila)		59	90	Scn9a	sodium channel, voltage-gated, type IX, alpha		21	92	Grid2	glutamate receptor, ionotropic, delta 2		16	82	RGD1562726	similar to Putative protein C21orf62 homolog							24	80	Clcn3	chloride channel, voltage-sensitive 3
24	90	LOC689437	similar to vitamin A-deficient testicular protein 11-like		22	92	Scara5	scavenger receptor class A, member 5 (putative)		22	92	Scara5	scavenger receptor class A, member 5 (putative)		29	88	Slc5a7	solute carrier family 5 (sodium/choline cotransporter), member 7		78	83	Ncoa7	nuclear receptor coactivator 7		60	89	Spred1	sprouty-related, EVH1 domain containing 1		22	92	Scara5	scavenger receptor class A, member 5 (putative)		17	81	Nyap2	neuronal tyrosine-phosphorylated phosphoinositide-3-kinase adaptor 2							1	99	Ralgapb	Ral GTPase activating protein, beta subunit (non-catalytic)
25	90	Ccdc43	coiled-coil domain containing 43		23	92	Thumpd3	THUMP domain containing 3		23	92	Thumpd3	THUMP domain containing 3		30	87	Pmch	pro-melanin-concentrating hormone		79	83	LOC102546630	protein gar2-like		61	89	Ndfip1	Nedd4 family interacting protein 1		23	92	Thumpd3	THUMP domain containing 3		18	80	Ocrl	oculocerebrorenal syndrome of Lowe							2	99	Appl2	adaptor protein, phosphotyrosine interaction, PH domain and leucine zipper containing 2
26	89	Ccar1	cell division cycle and apoptosis regulator 1		24	91	LOC100361535	hypothetical LOC100361535		24	91	LOC100361535	hypothetical LOC100361535		31	87	Rock2	Rho-associated coiled-coil containing protein kinase 2		80	83	LOC102557159	protein gar2-like		62	89	Mob4	MOB family member 4, phocein		24	91	LOC100361535	hypothetical LOC100361535		19	80	F2r	coagulation factor II (thrombin) receptor							3	99	Lats1	large tumor suppressor kinase 1
27	89	Acnat2	acyl-coenzyme A amino acid N-acyltransferase 2		25	91	Trps1	trichorhinophalangeal syndrome I		25	91	Trps1	trichorhinophalangeal syndrome I		32	87	Rai1	retinoic acid induced 1		81	82	Slc26a6	solute carrier family 26 (anion exchanger), member 6		63	89	Dlgap4	discs, large (Drosophila) homolog-associated protein 4		25	91	Trps1	trichorhinophalangeal syndrome I		20	80	Uba6	ubiquitin-like modifier activating enzyme 6							4	99	Wapal	wings apart-like homolog (Drosophila)
28	88	Rab6a	RAB6A, member RAS oncogene family		26	91	Fgd5	FYVE, RhoGEF and PH domain containing 5		26	91	Fgd5	FYVE, RhoGEF and PH domain containing 5		33	86	Bcl11a	B-cell CLL/lymphoma 11A (zinc finger protein)		82	82	Rhoa	ras homolog family member A		64	89	Cers6	ceramide synthase 6		26	91	Fgd5	FYVE, RhoGEF and PH domain containing 5		21	80	Zic3	Zic family member 3							5	98	Gria2	glutamate receptor, ionotropic, AMPA 2
29	88	Slc5a7	solute carrier family 5 (sodium/choline cotransporter), member 7		27	90	Ippk	inositol 1,3,4,5,6-pentakisphosphate 2-kinase		27	90	Ippk	inositol 1,3,4,5,6-pentakisphosphate 2-kinase		34	86	Fam196a	family with sequence similarity 196, member A		83	82	Arl13b	ADP-ribosylation factor-like 13B		65	89	Grm8	glutamate receptor, metabotropic 8		27	90	Ippk	inositol 1,3,4,5,6-pentakisphosphate 2-kinase		1	100	Arid2	AT rich interactive domain 2 (Arid-rfx like)							6	98	Msl2	male-specific lethal 2 homolog (Drosophila)
30	87	Pmch	pro-melanin-concentrating hormone		28	90	Cpsf7	cleavage and polyadenylation specific factor 7		28	90	Cpsf7	cleavage and polyadenylation specific factor 7		35	85	Rad23b	RAD23 homolog B (S. cerevisiae)		84	82	Klhl32	kelch-like family member 32		66	89	Slc25a13	solute carrier family 25 (aspartate/glutamate carrier), member 13		28	90	Cpsf7	cleavage and polyadenylation specific factor 7		2	99	Nfia	nuclear factor I/A							7	98	Ythdf3	YTH domain family, member 3
31	87	Rock2	Rho-associated coiled-coil containing protein kinase 2		29	90	Kcnk10	potassium channel, subfamily K, member 10		29	90	Kcnk10	potassium channel, subfamily K, member 10		36	85	Arpc1b	actin related protein 2/3 complex, subunit 1B		85	82	Igf2bp1	insulin-like growth factor 2 mRNA binding protein 1		67	89	Sorcs2	sortilin-related VPS10 domain containing receptor 2		29	90	Kcnk10	potassium channel, subfamily K, member 10		3	99	Xrn1	5'-3' exoribonuclease 1							8	98	Ccp110	centriolar coiled coil protein 110kDa
32	87	Rai1	retinoic acid induced 1		30	90	2017-09-07	septin 7		30	90	2017-09-07	septin 7		37	83	Hs2st1	heparan sulfate 2-O-sulfotransferase 1		86	81	Epb41l1	erythrocyte membrane protein band 4.1-like 1		68	89	Arpp21	cAMP-regulated phosphoprotein 21		30	90	2017-09-07	septin 7		4	99	Bmpr2	bone morphogenetic protein receptor, type II (serine/threonine kinase)							9	97	Stard13	StAR-related lipid transfer (START) domain containing 13
33	86	Bcl11a	B-cell CLL/lymphoma 11A (zinc finger protein)		31	89	Pik3cb	phosphatidylinositol-4,5-bisphosphate 3-kinase, catalytic subunit beta		31	89	Pik3cb	phosphatidylinositol-4,5-bisphosphate 3-kinase, catalytic subunit beta		38	83	Fv1	Friend virus susceptibility 1		87	81	Herpud1	homocysteine-inducible, endoplasmic reticulum stress-inducible, ubiquitin-like domain member 1		69	89	Tia1	TIA1 cytotoxic granule-associated RNA binding protein		31	89	Pik3cb	phosphatidylinositol-4,5-bisphosphate 3-kinase, catalytic subunit beta		5	98	Gpr116	G protein-coupled receptor 116							10	96	Arrdc3	arrestin domain containing 3
34	86	Fam196a	family with sequence similarity 196, member A		32	89	Esm1	endothelial cell-specific molecule 1		32	89	Esm1	endothelial cell-specific molecule 1		39	82	Arpc5	actin related protein 2/3 complex, subunit 5		88	81	Pip4k2b	phosphatidylinositol-5-phosphate 4-kinase, type II, beta		70	88	Cndp1	carnosine dipeptidase 1 (metallopeptidase M20 family)		32	89	Esm1	endothelial cell-specific molecule 1		6	98	Rab9b	RAB9B, member RAS oncogene family							11	96	Kdm6a	lysine (K)-specific demethylase 6A
35	85	Rad23b	RAD23 homolog B (S. cerevisiae)		33	89	Bmp2	bone morphogenetic protein 2		33	89	Bmp2	bone morphogenetic protein 2		40	82	Hdhd2	haloacid dehalogenase-like hydrolase domain containing 2		89	81	Btrc	beta-transducin repeat containing E3 ubiquitin protein ligase		71	88	Cdk19	cyclin-dependent kinase 19		33	89	Bmp2	bone morphogenetic protein 2		7	97	Atp2b2	ATPase, Ca++ transporting, plasma membrane 2							12	96	Mb21d2	Mab-21 domain containing 2
36	85	Arpc1b	actin related protein 2/3 complex, subunit 1B		34	88	Galnt3	UDP-N-acetyl-alpha-D-galactosamine:polypeptide N-acetylgalactosaminyltransferase 3 (GalNAc-T3)		34	88	Galnt3	UDP-N-acetyl-alpha-D-galactosamine:polypeptide N-acetylgalactosaminyltransferase 3 (GalNAc-T3)		41	82	LOC687465	hypothetical protein LOC687465		90	81	Rap1b	RAP1B, member of RAS oncogene family		72	88	Zbtb44	zinc finger and BTB domain containing 44		34	88	Galnt3	UDP-N-acetyl-alpha-D-galactosamine:polypeptide N-acetylgalactosaminyltransferase 3 (GalNAc-T3)		8	97	Grm3	glutamate receptor, metabotropic 3							13	95	Srgap2	SLIT-ROBO Rho GTPase activating protein 2
37	83	Hs2st1	heparan sulfate 2-O-sulfotransferase 1		35	88	Gria2	glutamate receptor, ionotropic, AMPA 2		35	88	Gria2	glutamate receptor, ionotropic, AMPA 2		42	82	Ryr2	ryanodine receptor 2, cardiac		91	81	Fa2h	fatty acid 2-hydroxylase		73	87	Fbxl16	F-box and leucine-rich repeat protein 16		35	88	Gria2	glutamate receptor, ionotropic, AMPA 2		9	97	Angpt1	angiopoietin 1							14	95	Cdk6	cyclin-dependent kinase 6
38	83	Fv1	Friend virus susceptibility 1		36	88	Csn2	casein beta		36	88	Csn2	casein beta		43	82	Otud4	OTU domain containing 4		92	81	Xpnpep2	X-prolyl aminopeptidase (aminopeptidase P) 2, membrane-bound		74	87	Cmpk1	cytidine monophosphate (UMP-CMP) kinase 1		36	88	Csn2	casein beta		10	96	Arrdc3	arrestin domain containing 3							15	95	Myocd	myocardin
39	82	Arpc5	actin related protein 2/3 complex, subunit 5		37	88	Rala	v-ral simian leukemia viral oncogene homolog A (ras related)		37	88	Rala	v-ral simian leukemia viral oncogene homolog A (ras related)		44	81	Sh3bgrl	SH3 domain binding glutamic acid-rich protein like		93	81	Ptbp3	polypyrimidine tract binding protein 3		75	87	Brwd3	bromodomain and WD repeat domain containing 3		37	88	Rala	v-ral simian leukemia viral oncogene homolog A (ras related)		11	95	Acly	ATP citrate lyase							16	95	Vamp7	vesicle-associated membrane protein 7
40	82	Hdhd2	haloacid dehalogenase-like hydrolase domain containing 2		38	88	Supt20	suppressor of Ty 20		38	88	Supt20	suppressor of Ty 20		45	81	Dnajc21	DnaJ (Hsp40) homolog, subfamily C, member 21		94	81	Emilin3	elastin microfibril interfacer 3		76	86	Map4k3	mitogen-activated protein kinase kinase kinase kinase 3		38	88	Supt20	suppressor of Ty 20		12	94	Ibtk	inhibitor of Bruton agammaglobulinemia tyrosine kinase							17	95	Rspo2	R-spondin 2
41	82	LOC687465	hypothetical protein LOC687465		39	87	Aldh3b2	aldehyde dehydrogenase 3 family, member B2		39	87	Aldh3b2	aldehyde dehydrogenase 3 family, member B2		46	81	Cbfb	core-binding factor, beta subunit		95	80	Fndc3a	fibronectin type III domain containing 3a		77	86	Slc1a3	solute carrier family 1 (glial high affinity glutamate transporter), member 3		39	87	Aldh3b2	aldehyde dehydrogenase 3 family, member B2		13	94	Amot	angiomotin							18	95	Mprip	myosin phosphatase Rho interacting protein
42	82	Ryr2	ryanodine receptor 2, cardiac		40	87	LOC688778	similar to fatty aldehyde dehydrogenase-like		40	87	LOC688778	similar to fatty aldehyde dehydrogenase-like		47	81	Bnip2	BCL2/adenovirus E1B interacting protein 2		96	80	Pbrm1	polybromo 1		78	86	Spast	spastin		40	87	LOC688778	similar to fatty aldehyde dehydrogenase-like		14	94	Mfsd1	major facilitator superfamily domain containing 1							19	95	Kifc3	kinesin family member C3
43	82	Otud4	OTU domain containing 4		41	87	Sp3	Sp3 transcription factor		41	87	Sp3	Sp3 transcription factor		48	81	Exoc3	exocyst complex component 3		97	80	Eps15	epidermal growth factor receptor pathway substrate 15		79	86	LOC501033	similar to UPF0258 protein KIAA1024		41	87	Sp3	Sp3 transcription factor		15	94	Tle4	transducin-like enhancer of split 4 (E(sp1) homolog, Drosophila)							20	94	Ppp1cb	protein phosphatase 1, catalytic subunit, beta isozyme
44	81	Sh3bgrl	SH3 domain binding glutamic acid-rich protein like		42	87	Orc1	origin recognition complex, subunit 1		42	87	Orc1	origin recognition complex, subunit 1		49	81	Hnrnpu	heterogeneous nuclear ribonucleoprotein U		98	80	Fktn	fukutin		80	86	Exoc2	exocyst complex component 2		42	87	Orc1	origin recognition complex, subunit 1		16	93	Phip	pleckstrin homology domain interacting protein							21	94	Myo1d	myosin ID
45	81	Dnajc21	DnaJ (Hsp40) homolog, subfamily C, member 21		43	87	Ppp6c	protein phosphatase 6, catalytic subunit		43	87	Ppp6c	protein phosphatase 6, catalytic subunit		50	80	R3hdm1	R3H domain containing 1		99	80	Canx	calnexin		81	86	Dennd6a	DENN/MADD domain containing 6A		43	87	Ppp6c	protein phosphatase 6, catalytic subunit		17	93	Gpbp1	GC-rich promoter binding protein 1							22	93	Col11a1	collagen, type XI, alpha 1
46	81	Cbfb	core-binding factor, beta subunit		44	87	Nkiras1	NFKB inhibitor interacting Ras-like 1		44	87	Nkiras1	NFKB inhibitor interacting Ras-like 1		51	80	Pura	purine rich element binding protein A		100	80	Cbx7	chromobox homolog 7		82	86	Il1rap	interleukin 1 receptor accessory protein		44	87	Nkiras1	NFKB inhibitor interacting Ras-like 1		18	93	Rmnd5a	required for meiotic nuclear division 5 homolog A (S. cerevisiae)							23	93	Pitpnc1	phosphatidylinositol transfer protein, cytoplasmic 1
47	81	Bnip2	BCL2/adenovirus E1B interacting protein 2		45	87	Pura	purine rich element binding protein A		45	87	Pura	purine rich element binding protein A		52	80	Gpr158	G protein-coupled receptor 158		1	100	Tshz3	teashirt zinc finger homeobox 3		83	85	Suv420h1	suppressor of variegation 4-20 homolog 1 (Drosophila)		45	87	Pura	purine rich element binding protein A		19	93	Tdg	thymine-DNA glycosylase							24	93	Cblb	Cbl proto-oncogene B, E3 ubiquitin protein ligase
48	81	Exoc3	exocyst complex component 3		46	86	Capza1	capping protein (actin filament) muscle Z-line, alpha 1		46	86	Capza1	capping protein (actin filament) muscle Z-line, alpha 1		53	80	Gltscr1l	GLTSCR1-like		2	98	Fam46a	family with sequence similarity 46, member A		84	85	Ythdf3	YTH domain family, member 3		46	86	Capza1	capping protein (actin filament) muscle Z-line, alpha 1		20	93	Sertad2	SERTA domain containing 2							25	92	Ate1	arginyltransferase 1
49	81	Hnrnpu	heterogeneous nuclear ribonucleoprotein U		47	86	Psmg4	proteasome (prosome, macropain) assembly chaperone 4		47	86	Psmg4	proteasome (prosome, macropain) assembly chaperone 4		1	92	Hspa5	heat shock protein 5		3	98	Rapgef2	Rap guanine nucleotide exchange factor (GEF) 2		85	85	Ctps2	CTP synthase 2		47	86	Psmg4	proteasome (prosome, macropain) assembly chaperone 4		21	92	Grid2	glutamate receptor, ionotropic, delta 2							26	92	Dync1i1	dynein cytoplasmic 1 intermediate chain 1
50	80	R3hdm1	R3H domain containing 1		48	86	Whsc1	Wolf-Hirschhorn syndrome candidate 1		48	86	Whsc1	Wolf-Hirschhorn syndrome candidate 1		2	88	Homer3	homer homolog 3 (Drosophila)		4	98	Zdhhc23	zinc finger, DHHC-type containing 23		86	85	Ireb2	iron responsive element binding protein 2		48	86	Whsc1	Wolf-Hirschhorn syndrome candidate 1		22	92	Scara5	scavenger receptor class A, member 5 (putative)							27	92	Timp3	TIMP metallopeptidase inhibitor 3
51	80	Pura	purine rich element binding protein A		49	85	Tgfb2	transforming growth factor, beta 2		49	85	Tgfb2	transforming growth factor, beta 2		3	88	Tex26	testis expressed 26		5	98	Nfat5	nuclear factor of activated T-cells 5, tonicity-responsive		87	85	Wdr96	WD repeat domain 96		49	85	Tgfb2	transforming growth factor, beta 2		23	92	Thumpd3	THUMP domain containing 3							28	92	Lif	leukemia inhibitory factor
52	80	Gpr158	G protein-coupled receptor 158		50	85	Slc26a7	solute carrier family 26 (anion exchanger), member 7		50	85	Slc26a7	solute carrier family 26 (anion exchanger), member 7		4	82	Pdgfb	platelet-derived growth factor beta polypeptide		6	98	Sbno1	strawberry notch homolog 1 (Drosophila)		88	85	Mgat3	mannosyl (beta-1,4-)-glycoprotein beta-1,4-N-acetylglucosaminyltransferase		50	85	Slc26a7	solute carrier family 26 (anion exchanger), member 7		24	91	LOC100361535	hypothetical LOC100361535							29	91	St13	suppression of tumorigenicity 13
53	80	Gltscr1l	GLTSCR1-like		51	84	Sh3rf3	SH3 domain containing ring finger 3		51	84	Sh3rf3	SH3 domain containing ring finger 3		1	92	Hspa5	heat shock protein 5		7	98	Gpr85	G protein-coupled receptor 85		89	84	Rps6kb1	ribosomal protein S6 kinase, polypeptide 1		51	84	Sh3rf3	SH3 domain containing ring finger 3		25	91	Trps1	trichorhinophalangeal syndrome I							30	90	Mblac2	metallo-beta-lactamase domain containing 2
1	100	Akap10	A kinase (PRKA) anchor protein 10		52	84	Kat6a	K(lysine) acetyltransferase 6A		52	84	Kat6a	K(lysine) acetyltransferase 6A		2	88	Homer3	homer homolog 3 (Drosophila)		8	98	Zfp513	zinc finger protein 513		90	84	Mier1	mesoderm induction early response 1, transcriptional regulator		52	84	Kat6a	K(lysine) acetyltransferase 6A		26	91	Fgd5	FYVE, RhoGEF and PH domain containing 5							31	90	Zcchc14	zinc finger, CCHC domain containing 14
2	100	Cpeb2	cytoplasmic polyadenylation element binding protein 2		53	84	Slc12a6	solute carrier family 12, member 6		53	84	Slc12a6	solute carrier family 12, member 6		3	88	Tex26	testis expressed 26		9	97	Yy1	YY1 transcription factor		91	84	Casp8ap2	caspase 8 associated protein 2		53	84	Slc12a6	solute carrier family 12, member 6		27	90	Ippk	inositol 1,3,4,5,6-pentakisphosphate 2-kinase							32	89	Msr1	macrophage scavenger receptor 1
3	100	Grk5	G protein-coupled receptor kinase 5		54	84	Man1a2	mannosidase, alpha, class 1A, member 2		54	84	Man1a2	mannosidase, alpha, class 1A, member 2		4	82	Pdgfb	platelet-derived growth factor beta polypeptide		10	97	Tmem52b	transmembrane protein 52B		92	84	Pcmtd1	protein-L-isoaspartate (D-aspartate) O-methyltransferase domain containing 1		54	84	Man1a2	mannosidase, alpha, class 1A, member 2		28	90	Cpsf7	cleavage and polyadenylation specific factor 7							33	89	Zfp281	zinc finger protein 281
4	100	St18	suppression of tumorigenicity 18		55	84	Tor1b	torsin family 1, member B		55	84	Tor1b	torsin family 1, member B		1	92	Hspa5	heat shock protein 5		11	97	Nucks1	nuclear casein kinase and cyclin-dependent kinase substrate 1		93	83	2017-03-07	membrane-associated ring finger (C3HC4) 7, E3 ubiquitin protein ligase		55	84	Tor1b	torsin family 1, member B		29	90	Kcnk10	potassium channel, subfamily K, member 10							34	88	Gk5	glycerol kinase 5 (putative)
5	100	Terf1	telomeric repeat binding factor (NIMA-interacting) 1		56	83	Il11	interleukin 11		56	83	Il11	interleukin 11		2	88	Homer3	homer homolog 3 (Drosophila)		12	97	Prpf4b	pre-mRNA processing factor 4B		94	83	Cyr61	cysteine-rich, angiogenic inducer, 61		56	83	Il11	interleukin 11		30	90	2017-09-07	septin 7							35	88	Lppr4	lipid phosphate phosphatase-related protein type 4
6	99	Nfya	nuclear transcription factor-Y alpha		57	83	Eif4a3	eukaryotic translation initiation factor 4A3		57	83	Eif4a3	eukaryotic translation initiation factor 4A3		3	88	Tex26	testis expressed 26		13	96	Suclg2	succinate-CoA ligase, GDP-forming, beta subunit		95	83	Lox	lysyl oxidase		57	83	Eif4a3	eukaryotic translation initiation factor 4A3		31	89	Pik3cb	phosphatidylinositol-4,5-bisphosphate 3-kinase, catalytic subunit beta							36	87	Cbr4	carbonyl reductase 4
7	99	Snca	synuclein, alpha (non A4 component of amyloid precursor)		58	83	Cgrrf1	cell growth regulator with ring finger domain 1		58	83	Cgrrf1	cell growth regulator with ring finger domain 1		4	82	Pdgfb	platelet-derived growth factor beta polypeptide		14	96	Mtdh	metadherin		96	83	Fam177a1	family with sequence similarity 177, member A1		58	83	Cgrrf1	cell growth regulator with ring finger domain 1		32	89	Esm1	endothelial cell-specific molecule 1							37	87	Zc4h2	zinc finger, C4H2 domain containing
8	99	Slc4a7	solute carrier family 4, sodium bicarbonate cotransporter, member 7		59	83	RGD1308601	similar to hypothetical protein		59	83	RGD1308601	similar to hypothetical protein		1	100	Pard6b	par-6 family cell polarity regulator beta		15	96	Nfatc3	nuclear factor of activated T-cells, cytoplasmic, calcineurin-dependent 3		97	83	Xkr4	XK, Kell blood group complex subunit-related family, member 4		59	83	RGD1308601	similar to hypothetical protein		33	89	Bmp2	bone morphogenetic protein 2							38	87	LOC680097	similar to germinal histone H4 gene
9	99	Zfp770	zinc finger protein 770		60	83	Thbs2	thrombospondin 2		60	83	Thbs2	thrombospondin 2		2	99	Abhd3	abhydrolase domain containing 3		16	95	Dpysl2	dihydropyrimidinase-like 2		98	82	Sspn	sarcospan		60	83	Thbs2	thrombospondin 2		34	88	Galnt3	UDP-N-acetyl-alpha-D-galactosamine:polypeptide N-acetylgalactosaminyltransferase 3 (GalNAc-T3)							39	87	Slc23a2	solute carrier family 23 (ascorbic acid transporter), member 2
10	99	Gabrb2	gamma-aminobutyric acid (GABA) A receptor, beta 2		61	82	Mesdc1	mesoderm development candidate 1		61	82	Mesdc1	mesoderm development candidate 1		3	99	Gli2	GLI family zinc finger 2		17	95	Kbtbd8	kelch repeat and BTB (POZ) domain containing 8		99	82	Mgat2	mannosyl (alpha-1,6-)-glycoprotein beta-1,2-N-acetylglucosaminyltransferase		61	82	Mesdc1	mesoderm development candidate 1		35	88	Gria2	glutamate receptor, ionotropic, AMPA 2							40	87	Tgif1	TGFB-induced factor homeobox 1
11	99	Ric3	RIC3 acetylcholine receptor chaperone		62	82	Erg	v-ets avian erythroblastosis virus E26 oncogene		62	82	Erg	v-ets avian erythroblastosis virus E26 oncogene		4	98	Esyt2	extended synaptotagmin-like protein 2		18	95	Ide	insulin degrading enzyme		100	82	Rps6ka3	ribosomal protein S6 kinase polypeptide 3		62	82	Erg	v-ets avian erythroblastosis virus E26 oncogene		36	88	Csn2	casein beta							41	86	Jag1	jagged 1
12	99	RGD1309748	similar to CG4768-PA		63	82	Fpgt	fucose-1-phosphate guanylyltransferase		63	82	Fpgt	fucose-1-phosphate guanylyltransferase		5	98	Plekha1	pleckstrin homology domain containing, family A (phosphoinositide binding specific) member 1		19	95	RGD1309079	similar to Ab2-095		101	82	Ammecr1l	AMME chromosomal region gene 1-like		63	82	Fpgt	fucose-1-phosphate guanylyltransferase		37	88	Rala	v-ral simian leukemia viral oncogene homolog A (ras related)							42	86	Fyn	FYN oncogene related to SRC, FGR, YES
13	99	Unc5d	unc-5 homolog D (C. elegans)		64	81	Zfp287	zinc finger protein 287		64	81	Zfp287	zinc finger protein 287		6	97	Vcp	valosin-containing protein		20	95	Gpcpd1	glycerophosphocholine phosphodiesterase GDE1 homolog (S. cerevisiae)		102	82	Pter	phosphotriesterase related		64	81	Zfp287	zinc finger protein 287		38	88	Supt20	suppressor of Ty 20							43	86	Zfp865	zinc finger protein 865
14	99	Ptprb	protein tyrosine phosphatase, receptor type, B		65	81	Atp1b4	ATPase, (Na+)/K+ transporting, beta 4 polypeptide		65	81	Atp1b4	ATPase, (Na+)/K+ transporting, beta 4 polypeptide		7	97	Adamts17	ADAM metallopeptidase with thrombospondin type 1 motif, 17		21	95	Ier5	immediate early response 5		103	82	Lsm12	LSM12 homolog (S. cerevisiae)		65	81	Atp1b4	ATPase, (Na+)/K+ transporting, beta 4 polypeptide		39	87	Aldh3b2	aldehyde dehydrogenase 3 family, member B2							44	86	Ptbp3	polypyrimidine tract binding protein 3
15	99	Bcl11a	B-cell CLL/lymphoma 11A (zinc finger protein)		66	81	Depdc1b	DEP domain containing 1B		66	81	Depdc1b	DEP domain containing 1B		8	97	Cd55	Cd55 molecule		22	95	Med13	mediator complex subunit 13		104	82	Galnt13	UDP-N-acetyl-alpha-D-galactosamine:polypeptide N-acetylgalactosaminyltransferase 13 (GalNAc-T13)		66	81	Depdc1b	DEP domain containing 1B		40	87	LOC688778	similar to fatty aldehyde dehydrogenase-like							45	86	Cpeb4	cytoplasmic polyadenylation element binding protein 4
16	98	Slc5a7	solute carrier family 5 (sodium/choline cotransporter), member 7		67	81	Xrcc5	X-ray repair complementing defective repair in Chinese hamster cells 5		67	81	Xrcc5	X-ray repair complementing defective repair in Chinese hamster cells 5		9	97	Naa30	N(alpha)-acetyltransferase 30, NatC catalytic subunit		23	94	Pura	purine rich element binding protein A		105	82	Eif1b	eukaryotic translation initiation factor 1B		67	81	Xrcc5	X-ray repair complementing defective repair in Chinese hamster cells 5		41	87	Sp3	Sp3 transcription factor							46	86	Maml1	mastermind like 1 (Drosophila)
17	98	Sgpp1	sphingosine-1-phosphate phosphatase 1		68	81	Pnrc1	proline-rich nuclear receptor coactivator 1		68	81	Pnrc1	proline-rich nuclear receptor coactivator 1		10	95	Kcnab1	potassium voltage-gated channel, shaker-related subfamily, beta member 1		24	94	Lats1	large tumor suppressor kinase 1		106	82	Nr4a3	nuclear receptor subfamily 4, group A, member 3		68	81	Pnrc1	proline-rich nuclear receptor coactivator 1		42	87	Orc1	origin recognition complex, subunit 1							47	86	Atad2	ATPase family, AAA domain containing 2
18	98	Kctd13	potassium channel tetramerization domain containing 13		69	81	Txlng	taxilin gamma		69	81	Txlng	taxilin gamma		11	95	Creb1	cAMP responsive element binding protein 1		25	93	Timm44	translocase of inner mitochondrial membrane 44 homolog (yeast)		107	81	Tjp1	tight junction protein 1		69	81	Txlng	taxilin gamma		43	87	Ppp6c	protein phosphatase 6, catalytic subunit							48	85	Pdzrn4	PDZ domain containing RING finger 4
19	98	Pdpk1	3-phosphoinositide dependent protein kinase-1		70	81	Adam22	ADAM metallopeptidase domain 22		70	81	Adam22	ADAM metallopeptidase domain 22		12	94	Eya4	eyes absent homolog 4 (Drosophila)		26	93	Ezh1	enhancer of zeste homolog 1 (Drosophila)		108	81	Asz1	ankyrin repeat, SAM and basic leucine zipper domain containing 1		70	81	Adam22	ADAM metallopeptidase domain 22		44	87	Nkiras1	NFKB inhibitor interacting Ras-like 1							49	85	Acsm4	acyl-CoA synthetase medium-chain family member 4
20	98	Ptprf	protein tyrosine phosphatase, receptor type, F		71	80	Gtf2b	general transcription factor IIB		71	80	Gtf2b	general transcription factor IIB		13	94	Atp1b3	ATPase, Na+/K+ transporting, beta 3 polypeptide		27	93	Gabrg2	gamma-aminobutyric acid (GABA) A receptor, gamma 2		109	81	Olfm3	olfactomedin 3		71	80	Gtf2b	general transcription factor IIB		45	87	Pura	purine rich element binding protein A							50	85	RGD1564053	similar to hypothetical protein
21	98	Dpys	dihydropyrimidinase		72	80	Avl9	AVL9 homolog (S. cerevisiase)		72	80	Avl9	AVL9 homolog (S. cerevisiase)		14	94	Rimklb	ribosomal modification protein rimK-like family member B		28	93	Cpeb4	cytoplasmic polyadenylation element binding protein 4		110	81	Atad5	ATPase family, AAA domain containing 5		72	80	Avl9	AVL9 homolog (S. cerevisiase)		46	86	Capza1	capping protein (actin filament) muscle Z-line, alpha 1							51	85	Fam122b	family with sequence similarity 122B
22	98	Cdh5	cadherin 5		1	92	Hspa5	heat shock protein 5		1	92	Hspa5	heat shock protein 5		15	93	Prkacb	protein kinase, cAMP dependent, catalytic, beta		29	93	Zdhhc3	zinc finger, DHHC-type containing 3		111	81	P2ry12	purinergic receptor P2Y, G-protein coupled, 12		1	92	Hspa5	heat shock protein 5		47	86	Psmg4	proteasome (prosome, macropain) assembly chaperone 4							52	85	Golga3	golgin A3
23	98	Cbfb	core-binding factor, beta subunit		2	88	Homer3	homer homolog 3 (Drosophila)		2	88	Homer3	homer homolog 3 (Drosophila)		16	93	Sync	syncoilin, intermediate filament protein		30	93	Rngtt	RNA guanylyltransferase and 5'-phosphatase		112	80	Sh2d1b2	SH2 domain protein 1B2		2	88	Homer3	homer homolog 3 (Drosophila)		48	86	Whsc1	Wolf-Hirschhorn syndrome candidate 1							53	85	Sgpp1	sphingosine-1-phosphate phosphatase 1
24	97	Bnip2	BCL2/adenovirus E1B interacting protein 2		3	88	Tex26	testis expressed 26		3	88	Tex26	testis expressed 26		17	92	Pkia	protein kinase (cAMP-dependent, catalytic) inhibitor alpha		31	93	Kcnh7	potassium voltage-gated channel, subfamily H (eag-related), member 7		113	80	Mpzl2	myelin protein zero-like 2		3	88	Tex26	testis expressed 26		49	85	Tgfb2	transforming growth factor, beta 2							54	85	Megf9	multiple EGF-like-domains 9
25	97	Cmpk1	cytidine monophosphate (UMP-CMP) kinase 1		4	82	Pdgfb	platelet-derived growth factor beta polypeptide		4	82	Pdgfb	platelet-derived growth factor beta polypeptide		18	92	Pcdh9	protocadherin 9		32	92	Vamp4	vesicle-associated membrane protein 4		114	80	Mei4	meiosis-specific 4 homolog (S. cerevisiae)		4	82	Pdgfb	platelet-derived growth factor beta polypeptide		50	85	Slc26a7	solute carrier family 26 (anion exchanger), member 7							55	84	Srsf1	serine/arginine-rich splicing factor 1
26	97	Acnat2	acyl-coenzyme A amino acid N-acyltransferase 2		1	92	Hspa5	heat shock protein 5		1	100	Pard6b	par-6 family cell polarity regulator beta		19	92	Trappc8	trafficking protein particle complex 8		33	92	Epha7	Eph receptor A7		115	80	RGD1308601	similar to hypothetical protein		1	92	Hspa5	heat shock protein 5		51	84	Sh3rf3	SH3 domain containing ring finger 3							56	84	Hic2	hypermethylated in cancer 2
27	97	Rab6a	RAB6A, member RAS oncogene family		2	88	Homer3	homer homolog 3 (Drosophila)		2	99	Abhd3	abhydrolase domain containing 3		20	91	Lpgat1	lysophosphatidylglycerol acyltransferase 1		34	92	Vgll4	vestigial like 4 (Drosophila)		116	80	Stag1	stromal antigen 1		2	88	Homer3	homer homolog 3 (Drosophila)		52	84	Kat6a	K(lysine) acetyltransferase 6A							57	84	Pafah1b1	platelet-activating factor acetylhydrolase 1b, regulatory subunit 1
28	97	Rala	v-ral simian leukemia viral oncogene homolog A (ras related)		3	88	Tex26	testis expressed 26		3	99	Gli2	GLI family zinc finger 2		21	91	Prkcb	protein kinase C, beta		35	92	Sirt7	sirtuin 7		117	80	Osbpl3	oxysterol binding protein-like 3		3	88	Tex26	testis expressed 26		53	84	Slc12a6	solute carrier family 12, member 6							58	84	Fgd6	FYVE, RhoGEF and PH domain containing 6
29	97	Flrt2	fibronectin leucine rich transmembrane protein 2		4	82	Pdgfb	platelet-derived growth factor beta polypeptide		4	98	Esyt2	extended synaptotagmin-like protein 2		22	91	Klf12	Kruppel-like factor 12		36	91	Kctd6	potassium channel tetramerization domain containing 6		118	80	Slc17a6	solute carrier family 17 (vesicular glutamate transporter), member 6		4	82	Pdgfb	platelet-derived growth factor beta polypeptide		54	84	Man1a2	mannosidase, alpha, class 1A, member 2							59	84	Ahdc1	AT hook, DNA binding motif, containing 1
30	97	Ccdc43	coiled-coil domain containing 43		1	100	Tshz3	teashirt zinc finger homeobox 3		5	98	Plekha1	pleckstrin homology domain containing, family A (phosphoinositide binding specific) member 1		23	90	Fbxl17	F-box and leucine-rich repeat protein 17		37	91	LOC100909688	zinc finger protein 43-like		119	80	Ccdc88a	coiled coil domain containing 88A		1	100	Tshz3	teashirt zinc finger homeobox 3		55	84	Tor1b	torsin family 1, member B							60	84	Satb2	SATB homeobox 2
31	97	Gpr158	G protein-coupled receptor 158		2	98	Fam46a	family with sequence similarity 46, member A		6	97	Vcp	valosin-containing protein		24	90	Wwox	WW domain-containing oxidoreductase		38	91	Capn6	calpain 6		120	80	Pogz	pogo transposable element with ZNF domain		2	98	Fam46a	family with sequence similarity 46, member A		56	83	Il11	interleukin 11							61	84	Szrd1	SUZ RNA binding domain containing 1
32	97	LOC689437	similar to vitamin A-deficient testicular protein 11-like		3	98	Rapgef2	Rap guanine nucleotide exchange factor (GEF) 2		7	97	Adamts17	ADAM metallopeptidase with thrombospondin type 1 motif, 17		25	89	Mtpap	mitochondrial poly(A) polymerase		39	91	Brinp3	bone morphogenetic protein/retinoic acid inducible neural-specific 3		1	99	RGD1566359	similar to RIKEN cDNA B230219D22		3	98	Rapgef2	Rap guanine nucleotide exchange factor (GEF) 2		57	83	Eif4a3	eukaryotic translation initiation factor 4A3							62	83	Itgae	integrin, alpha E
33	96	Ccar1	cell division cycle and apoptosis regulator 1		4	98	Zdhhc23	zinc finger, DHHC-type containing 23		8	97	Cd55	Cd55 molecule		26	89	Slc17a2	solute carrier family 17, member 2		40	91	Strn3	striatin, calmodulin binding protein 3		2	97	Kpna1	karyopherin alpha 1		4	98	Zdhhc23	zinc finger, DHHC-type containing 23		58	83	Cgrrf1	cell growth regulator with ring finger domain 1							63	83	Dph6	diphthamine biosynthesis 6
34	96	Cpsf6	cleavage and polyadenylation specific factor 6, 68kDa		5	98	Nfat5	nuclear factor of activated T-cells 5, tonicity-responsive		9	97	Naa30	N(alpha)-acetyltransferase 30, NatC catalytic subunit		27	88	Lrrc8c	leucine rich repeat containing 8 family, member C		41	90	Golga3	golgin A3		3	96	Cpa4	carboxypeptidase A4		5	98	Nfat5	nuclear factor of activated T-cells 5, tonicity-responsive		59	83	RGD1308601	similar to hypothetical protein							64	83	Kpna3	karyopherin alpha 3
35	96	Dcun1d4	DCN1, defective in cullin neddylation 1, domain containing 4		6	98	Sbno1	strawberry notch homolog 1 (Drosophila)		10	95	Kcnab1	potassium voltage-gated channel, shaker-related subfamily, beta member 1		28	88	Cdh8	cadherin 8		42	90	Ube2d2	ubiquitin-conjugating enzyme E2D 2		4	95	Bmper	BMP-binding endothelial regulator		6	98	Sbno1	strawberry notch homolog 1 (Drosophila)		60	83	Thbs2	thrombospondin 2							65	83	Btaf1	BTAF1 RNA polymerase II, B-TFIID transcription factor-associated, 170kDa
36	96	Rai1	retinoic acid induced 1		7	98	Gpr85	G protein-coupled receptor 85		11	95	Creb1	cAMP responsive element binding protein 1		29	88	Magi3	membrane associated guanylate kinase, WW and PDZ domain containing 3		43	90	Pum2	pumilio RNA-binding family member 2		5	95	Cers6	ceramide synthase 6		7	98	Gpr85	G protein-coupled receptor 85		61	82	Mesdc1	mesoderm development candidate 1							66	82	Lpp	LIM domain containing preferred translocation partner in lipoma
37	96	Pmch	pro-melanin-concentrating hormone		8	98	Zfp513	zinc finger protein 513		12	94	Eya4	eyes absent homolog 4 (Drosophila)		30	86	Myo1d	myosin ID		44	89	Ugt2b1	UDP glucuronosyltransferase 2 family, polypeptide B1		6	95	Cisd2	CDGSH iron sulfur domain 2		8	98	Zfp513	zinc finger protein 513		62	82	Erg	v-ets avian erythroblastosis virus E26 oncogene							67	82	Prune2	prune homolog 2 (Drosophila)
38	95	Tnpo1	transportin 1		9	97	Yy1	YY1 transcription factor		13	94	Atp1b3	ATPase, Na+/K+ transporting, beta 3 polypeptide		31	86	Utrn	utrophin		45	89	Zfp148	zinc finger protein 148		7	95	Ptprb	protein tyrosine phosphatase, receptor type, B		9	97	Yy1	YY1 transcription factor		63	82	Fpgt	fucose-1-phosphate guanylyltransferase							68	82	RGD1309748	similar to CG4768-PA
39	95	Fubp1	far upstream element (FUSE) binding protein 1		10	97	Tmem52b	transmembrane protein 52B		14	94	Rimklb	ribosomal modification protein rimK-like family member B		32	86	2017-03-05	membrane-associated ring finger (C3HC4) 5		46	89	Ubxn2b	UBX domain protein 2B		8	94	Gata3	GATA binding protein 3		10	97	Tmem52b	transmembrane protein 52B		64	81	Zfp287	zinc finger protein 287							69	82	Aim2	absent in melanoma 2
40	95	LOC687465	hypothetical protein LOC687465		11	97	Nucks1	nuclear casein kinase and cyclin-dependent kinase substrate 1		15	93	Prkacb	protein kinase, cAMP dependent, catalytic, beta		33	86	Sema3d	sema domain, immunoglobulin domain (Ig), short basic domain, secreted, (semaphorin) 3D		47	88	Thbs2	thrombospondin 2		9	94	Foxn3	forkhead box N3		11	97	Nucks1	nuclear casein kinase and cyclin-dependent kinase substrate 1		65	81	Atp1b4	ATPase, (Na+)/K+ transporting, beta 4 polypeptide							70	81	Hmgxb4	HMG box domain containing 4
41	95	Rad23b	RAD23 homolog B (S. cerevisiae)		12	97	Prpf4b	pre-mRNA processing factor 4B		16	93	Sync	syncoilin, intermediate filament protein		34	85	Helz	helicase with zinc finger		48	88	Ppapdc1b	phosphatidic acid phosphatase type 2 domain containing 1B		10	94	Letm1	leucine zipper-EF-hand containing transmembrane protein 1		12	97	Prpf4b	pre-mRNA processing factor 4B		66	81	Depdc1b	DEP domain containing 1B							71	81	Oraov1	oral cancer overexpressed 1
42	95	R3hdm1	R3H domain containing 1		13	96	Suclg2	succinate-CoA ligase, GDP-forming, beta subunit		17	92	Pkia	protein kinase (cAMP-dependent, catalytic) inhibitor alpha		35	85	Rin2	Ras and Rab interactor 2		49	88	Ptpn4	protein tyrosine phosphatase, non-receptor type 4		11	93	Hs6st2	heparan sulfate 6-O-sulfotransferase 2		13	96	Suclg2	succinate-CoA ligase, GDP-forming, beta subunit		67	81	Xrcc5	X-ray repair complementing defective repair in Chinese hamster cells 5							72	81	Bmpr2	bone morphogenetic protein receptor, type II (serine/threonine kinase)
43	94	Dnajc21	DnaJ (Hsp40) homolog, subfamily C, member 21		14	96	Mtdh	metadherin		18	92	Pcdh9	protocadherin 9		36	85	Vps4b	vacuolar protein sorting 4 homolog B (S. cerevisiae)		50	88	Kmt2e	lysine (K)-specific methyltransferase 2E		12	92	Nova1	neuro-oncological ventral antigen 1		14	96	Mtdh	metadherin		68	81	Pnrc1	proline-rich nuclear receptor coactivator 1							73	81	Anp32a	acidic (leucine-rich) nuclear phosphoprotein 32 family, member A
44	94	Hdhd2	haloacid dehalogenase-like hydrolase domain containing 2		15	96	Nfatc3	nuclear factor of activated T-cells, cytoplasmic, calcineurin-dependent 3		19	92	Trappc8	trafficking protein particle complex 8		37	85	Ube2e3	ubiquitin-conjugating enzyme E2E 3		51	88	Ccnj	cyclin J		13	92	Frmd4b	FERM domain containing 4B		15	96	Nfatc3	nuclear factor of activated T-cells, cytoplasmic, calcineurin-dependent 3		69	81	Txlng	taxilin gamma							74	81	Lims1	LIM and senescent cell antigen-like domains 1
45	94	Adam22	ADAM metallopeptidase domain 22		16	95	Dpysl2	dihydropyrimidinase-like 2		20	91	Lpgat1	lysophosphatidylglycerol acyltransferase 1		38	85	Mef2c	myocyte enhancer factor 2C		52	87	Prepl	prolyl endopeptidase-like		14	91	Tspan3	tetraspanin 3		16	95	Dpysl2	dihydropyrimidinase-like 2		70	81	Adam22	ADAM metallopeptidase domain 22							75	80	Fignl2	fidgetin-like 2
46	94	Arpc5	actin related protein 2/3 complex, subunit 5		17	95	Kbtbd8	kelch repeat and BTB (POZ) domain containing 8		21	91	Prkcb	protein kinase C, beta		39	85	Hipk3	homeodomain interacting protein kinase 3		53	87	Slc2a13	solute carrier family 2 (facilitated glucose transporter), member 13		15	90	Tmem30a	transmembrane protein 30A		17	95	Kbtbd8	kelch repeat and BTB (POZ) domain containing 8		71	80	Gtf2b	general transcription factor IIB							76	80	Ift122	intraflagellar transport 122 homolog (Chlamydomonas)
47	94	Gltscr1l	GLTSCR1-like		18	95	Ide	insulin degrading enzyme		22	91	Klf12	Kruppel-like factor 12		40	84	Cops7b	COP9 signalosome subunit 7B		54	87	St7l	suppression of tumorigenicity 7-like		16	90	Actr6	ARP6 actin-related protein 6 homolog (yeast)		18	95	Ide	insulin degrading enzyme		72	80	Avl9	AVL9 homolog (S. cerevisiase)							77	80	Magi3	membrane associated guanylate kinase, WW and PDZ domain containing 3
48	94	Hs2st1	heparan sulfate 2-O-sulfotransferase 1		19	95	RGD1309079	similar to Ab2-095		23	90	Fbxl17	F-box and leucine-rich repeat protein 17		41	84	Abi3bp	ABI family, member 3 (NESH) binding protein		55	87	Echdc1	enoyl CoA hydratase domain containing 1		17	89	Nek9	NIMA-related kinase 9		19	95	RGD1309079	similar to Ab2-095		1	99	Cpeb2	cytoplasmic polyadenylation element binding protein 2							78	80	Marcks	myristoylated alanine rich protein kinase C substrate
49	94	Prkd3	protein kinase D3		20	95	Gpcpd1	glycerophosphocholine phosphodiesterase GDE1 homolog (S. cerevisiae)		24	90	Wwox	WW domain-containing oxidoreductase		42	84	Arrdc3	arrestin domain containing 3		56	86	Arhgap5	Rho GTPase activating protein 5		18	89	Cenpi	centromere protein I		20	95	Gpcpd1	glycerophosphocholine phosphodiesterase GDE1 homolog (S. cerevisiae)		2	99	Terf1	telomeric repeat binding factor (NIMA-interacting) 1							79	80	LOC100359421	histone H3.3B-like
50	94	Fv1	Friend virus susceptibility 1		21	95	Ier5	immediate early response 5		25	89	Mtpap	mitochondrial poly(A) polymerase		43	83	Kif14	kinesin family member 14		57	86	Bloc1s6	biogenesis of lysosomal organelles complex-1, subunit 6, pallidin		19	87	Ms4a4c	membrane-spanning 4-domains, subfamily A, member 4C		21	95	Ier5	immediate early response 5		3	99	St18	suppression of tumorigenicity 18							1	99	RGD1566359	similar to RIKEN cDNA B230219D22
51	94	Phip	pleckstrin homology domain interacting protein		22	95	Med13	mediator complex subunit 13		26	89	Slc17a2	solute carrier family 17, member 2		44	83	Gnrhr	gonadotropin releasing hormone receptor		58	86	Rb1cc1	RB1-inducible coiled-coil 1		20	87	RGD1309747	similar to KIAA0947 protein		22	95	Med13	mediator complex subunit 13		4	97	Grk5	G protein-coupled receptor kinase 5							2	97	Kpna1	karyopherin alpha 1
52	93	Ryr2	ryanodine receptor 2, cardiac		23	94	Pura	purine rich element binding protein A		27	88	Lrrc8c	leucine rich repeat containing 8 family, member C		45	83	Ptprj	protein tyrosine phosphatase, receptor type, J		59	85	Edem3	ER degradation enhancer, mannosidase alpha-like 3		21	86	Clec1a	C-type lectin domain family 1, member A		23	94	Pura	purine rich element binding protein A		5	97	Akap10	A kinase (PRKA) anchor protein 10							3	96	Cpa4	carboxypeptidase A4
53	93	Hnrnpu	heterogeneous nuclear ribonucleoprotein U		24	94	Lats1	large tumor suppressor kinase 1		28	88	Cdh8	cadherin 8		46	83	Wdr26	WD repeat domain 26		60	85	LOC100909825	probable isocitrate dehydrogenase [NAD] gamma 2, mitochondrial-like		22	86	Mrpl35	mitochondrial ribosomal protein L35		24	94	Lats1	large tumor suppressor kinase 1		6	97	Zfp770	zinc finger protein 770							4	95	Bmper	BMP-binding endothelial regulator
54	93	Ube2q2	ubiquitin-conjugating enzyme E2Q family member 2		25	93	Timm44	translocase of inner mitochondrial membrane 44 homolog (yeast)		29	88	Magi3	membrane associated guanylate kinase, WW and PDZ domain containing 3		47	82	Stag2	stromal antigen 2		61	85	Lrrc55	leucine rich repeat containing 55		23	86	Wwp1	WW domain containing E3 ubiquitin protein ligase 1		25	93	Timm44	translocase of inner mitochondrial membrane 44 homolog (yeast)		7	97	Snca	synuclein, alpha (non A4 component of amyloid precursor)							5	95	Cers6	ceramide synthase 6
55	93	Eif1a	eukaryotic translation initiation factor 1A		26	93	Ezh1	enhancer of zeste homolog 1 (Drosophila)		30	86	Myo1d	myosin ID		48	82	Kctd21	potassium channel tetramerization domain containing 21		62	85	Enc1	ectodermal-neural cortex 1		24	84	Lrp12	low density lipoprotein receptor-related protein 12		26	93	Ezh1	enhancer of zeste homolog 1 (Drosophila)		8	97	Slc4a7	solute carrier family 4, sodium bicarbonate cotransporter, member 7							6	95	Cisd2	CDGSH iron sulfur domain 2
56	93	Ndufaf4	NADH dehydrogenase (ubiquinone) complex I, assembly factor 4		27	93	Gabrg2	gamma-aminobutyric acid (GABA) A receptor, gamma 2		31	86	Utrn	utrophin		49	81	Fcgr2b	Fc fragment of IgG, low affinity IIb, receptor (CD32)		63	85	Fam84b	family with sequence similarity 84, member B		25	83	Aff2	AF4/FMR2 family, member 2		27	93	Gabrg2	gamma-aminobutyric acid (GABA) A receptor, gamma 2		9	97	Ric3	RIC3 acetylcholine receptor chaperone							7	95	Ptprb	protein tyrosine phosphatase, receptor type, B
57	93	Otud4	OTU domain containing 4		28	93	Cpeb4	cytoplasmic polyadenylation element binding protein 4		32	86	2017-03-05	membrane-associated ring finger (C3HC4) 5		50	80	Tjp1	tight junction protein 1		64	85	Cdan1	codanin 1		26	83	Pde1c	phosphodiesterase 1C		28	93	Cpeb4	cytoplasmic polyadenylation element binding protein 4		10	96	Nfya	nuclear transcription factor-Y alpha							8	94	Gata3	GATA binding protein 3
58	93	Sh3bgrl	SH3 domain binding glutamic acid-rich protein like		29	93	Zdhhc3	zinc finger, DHHC-type containing 3		33	86	Sema3d	sema domain, immunoglobulin domain (Ig), short basic domain, secreted, (semaphorin) 3D		51	80	Errfi1	ERBB receptor feedback inhibitor 1		65	84	Dusp18	dual specificity phosphatase 18		27	82	Oprm1	opioid receptor, mu 1		29	93	Zdhhc3	zinc finger, DHHC-type containing 3		11	95	Sgpp1	sphingosine-1-phosphate phosphatase 1							9	94	Foxn3	forkhead box N3
59	93	Rpe	ribulose-5-phosphate-3-epimerase		30	93	Rngtt	RNA guanylyltransferase and 5'-phosphatase		34	85	Helz	helicase with zinc finger		1	100	Tshz3	teashirt zinc finger homeobox 3		66	84	Ca1	carbonic anhydrase I		28	81	Ubtd2	ubiquitin domain containing 2		30	93	Rngtt	RNA guanylyltransferase and 5'-phosphatase		12	94	Gabrb2	gamma-aminobutyric acid (GABA) A receptor, beta 2							10	94	Letm1	leucine zipper-EF-hand containing transmembrane protein 1
60	93	Pfn2	profilin 2		31	93	Kcnh7	potassium voltage-gated channel, subfamily H (eag-related), member 7		35	85	Rin2	Ras and Rab interactor 2		2	98	Fam46a	family with sequence similarity 46, member A		67	84	Mtmr3	myotubularin related protein 3		29	81	Itgav	integrin, alpha V		31	93	Kcnh7	potassium voltage-gated channel, subfamily H (eag-related), member 7		13	94	Kctd13	potassium channel tetramerization domain containing 13							11	93	Hs6st2	heparan sulfate 6-O-sulfotransferase 2
61	93	Pura	purine rich element binding protein A		32	92	Vamp4	vesicle-associated membrane protein 4		36	85	Vps4b	vacuolar protein sorting 4 homolog B (S. cerevisiae)		3	98	Rapgef2	Rap guanine nucleotide exchange factor (GEF) 2		68	84	LOC102551035	serine/arginine repetitive matrix protein 4-like		30	81	Rabl3	RAB, member of RAS oncogene family-like 3		32	92	Vamp4	vesicle-associated membrane protein 4		14	94	Pdpk1	3-phosphoinositide dependent protein kinase-1							12	92	Nova1	neuro-oncological ventral antigen 1
62	93	Chd6	chromodomain helicase DNA binding protein 6		33	92	Epha7	Eph receptor A7		37	85	Ube2e3	ubiquitin-conjugating enzyme E2E 3		4	98	Zdhhc23	zinc finger, DHHC-type containing 23		69	84	Ago1	argonaute RISC catalytic component 1		31	81	Gabrg2	gamma-aminobutyric acid (GABA) A receptor, gamma 2		33	92	Epha7	Eph receptor A7		15	93	Ndufaf4	NADH dehydrogenase (ubiquinone) complex I, assembly factor 4							13	92	Frmd4b	FERM domain containing 4B
63	92	RGD1311874	hypothetical LOC300751		34	92	Vgll4	vestigial like 4 (Drosophila)		38	85	Mef2c	myocyte enhancer factor 2C		5	98	Nfat5	nuclear factor of activated T-cells 5, tonicity-responsive		70	84	Mmgt1	membrane magnesium transporter 1		32	81	Hecw2	HECT, C2 and WW domain containing E3 ubiquitin protein ligase 2		34	92	Vgll4	vestigial like 4 (Drosophila)		16	93	Dpys	dihydropyrimidinase							14	91	Tspan3	tetraspanin 3
64	92	Zfand6	zinc finger, AN1-type domain 6		35	92	Sirt7	sirtuin 7		39	85	Hipk3	homeodomain interacting protein kinase 3		6	98	Sbno1	strawberry notch homolog 1 (Drosophila)		71	84	Rassf4	Ras association (RalGDS/AF-6) domain family member 4		33	80	LOC100912573	membrane-spanning 4-domains subfamily A member 6B-like		35	92	Sirt7	sirtuin 7		17	92	RGD1309748	similar to CG4768-PA							15	90	Tmem30a	transmembrane protein 30A
65	92	Sft2d2	SFT2 domain containing 2		36	91	Kctd6	potassium channel tetramerization domain containing 6		40	84	Cops7b	COP9 signalosome subunit 7B		7	98	Gpr85	G protein-coupled receptor 85		72	83	Arhgap42	Rho GTPase activating protein 42		34	80	Ms4a6bl	membrane-spanning 4-domains, subfamily A, member 6B-like		36	91	Kctd6	potassium channel tetramerization domain containing 6		18	91	Ptprf	protein tyrosine phosphatase, receptor type, F							16	90	Actr6	ARP6 actin-related protein 6 homolog (yeast)
66	92	Add3	adducin 3 (gamma)		37	91	LOC100909688	zinc finger protein 43-like		41	84	Abi3bp	ABI family, member 3 (NESH) binding protein		8	98	Zfp513	zinc finger protein 513		73	83	Tc2n	tandem C2 domains, nuclear		1	99	RGD1566359	similar to RIKEN cDNA B230219D22		37	91	LOC100909688	zinc finger protein 43-like		19	91	Cmpk1	cytidine monophosphate (UMP-CMP) kinase 1							17	89	Nek9	NIMA-related kinase 9
67	92	Bpgm	2,3-bisphosphoglycerate mutase		38	91	Capn6	calpain 6		42	84	Arrdc3	arrestin domain containing 3		9	97	Yy1	YY1 transcription factor		74	83	RGD1565058	similar to RIKEN cDNA 1700019M22		2	97	Kpna1	karyopherin alpha 1		38	91	Capn6	calpain 6		20	91	Cdh5	cadherin 5							18	89	Cenpi	centromere protein I
68	92	Fam49b	family with sequence similarity 49, member B		39	91	Brinp3	bone morphogenetic protein/retinoic acid inducible neural-specific 3		43	83	Kif14	kinesin family member 14		10	97	Tmem52b	transmembrane protein 52B		75	83	Cbfa2t2	core-binding factor, runt domain, alpha subunit 2; translocated to, 2		3	96	Cpa4	carboxypeptidase A4		39	91	Brinp3	bone morphogenetic protein/retinoic acid inducible neural-specific 3		21	91	Rala	v-ral simian leukemia viral oncogene homolog A (ras related)							19	87	Ms4a4c	membrane-spanning 4-domains, subfamily A, member 4C
69	92	Snap25	synaptosomal-associated protein 25		40	91	Strn3	striatin, calmodulin binding protein 3		44	83	Gnrhr	gonadotropin releasing hormone receptor		11	97	Nucks1	nuclear casein kinase and cyclin-dependent kinase substrate 1		76	83	Hsd11b2	hydroxysteroid 11-beta dehydrogenase 2		4	95	Bmper	BMP-binding endothelial regulator		40	91	Strn3	striatin, calmodulin binding protein 3		22	90	Unc5d	unc-5 homolog D (C. elegans)							20	87	RGD1309747	similar to KIAA0947 protein
70	92	Sema3a	sema domain, immunoglobulin domain (Ig), short basic domain, secreted, (semaphorin) 3A		41	90	Golga3	golgin A3		45	83	Ptprj	protein tyrosine phosphatase, receptor type, J		12	97	Prpf4b	pre-mRNA processing factor 4B		77	83	Robo2	roundabout, axon guidance receptor, homolog 2 (Drosophila)		5	95	Cers6	ceramide synthase 6		41	90	Golga3	golgin A3		23	90	Ptprb	protein tyrosine phosphatase, receptor type, B							21	86	Clec1a	C-type lectin domain family 1, member A
71	91	Manba	mannosidase, beta A, lysosomal		42	90	Ube2d2	ubiquitin-conjugating enzyme E2D 2		46	83	Wdr26	WD repeat domain 26		13	96	Suclg2	succinate-CoA ligase, GDP-forming, beta subunit		78	83	Ncoa7	nuclear receptor coactivator 7		6	95	Cisd2	CDGSH iron sulfur domain 2		42	90	Ube2d2	ubiquitin-conjugating enzyme E2D 2		24	90	LOC689437	similar to vitamin A-deficient testicular protein 11-like							22	86	Mrpl35	mitochondrial ribosomal protein L35
72	91	Dgat2	diacylglycerol O-acyltransferase 2		43	90	Pum2	pumilio RNA-binding family member 2		47	82	Stag2	stromal antigen 2		14	96	Mtdh	metadherin		79	83	LOC102546630	protein gar2-like		7	95	Ptprb	protein tyrosine phosphatase, receptor type, B		43	90	Pum2	pumilio RNA-binding family member 2		25	90	Ccdc43	coiled-coil domain containing 43							23	86	Wwp1	WW domain containing E3 ubiquitin protein ligase 1
73	91	Ppp2ca	protein phosphatase 2, catalytic subunit, alpha isozyme		44	89	Ugt2b1	UDP glucuronosyltransferase 2 family, polypeptide B1		48	82	Kctd21	potassium channel tetramerization domain containing 21		15	96	Nfatc3	nuclear factor of activated T-cells, cytoplasmic, calcineurin-dependent 3		80	83	LOC102557159	protein gar2-like		8	94	Gata3	GATA binding protein 3		44	89	Ugt2b1	UDP glucuronosyltransferase 2 family, polypeptide B1		26	89	Ccar1	cell division cycle and apoptosis regulator 1							24	84	Lrp12	low density lipoprotein receptor-related protein 12
74	91	Gas2l2	growth arrest-specific 2 like 2		45	89	Zfp148	zinc finger protein 148		49	81	Fcgr2b	Fc fragment of IgG, low affinity IIb, receptor (CD32)		16	95	Dpysl2	dihydropyrimidinase-like 2		81	82	Slc26a6	solute carrier family 26 (anion exchanger), member 6		9	94	Foxn3	forkhead box N3		45	89	Zfp148	zinc finger protein 148		27	89	Acnat2	acyl-coenzyme A amino acid N-acyltransferase 2							25	83	Aff2	AF4/FMR2 family, member 2
75	91	Tll1	tolloid-like 1		46	89	Ubxn2b	UBX domain protein 2B		50	80	Tjp1	tight junction protein 1		17	95	Kbtbd8	kelch repeat and BTB (POZ) domain containing 8		82	82	Rhoa	ras homolog family member A		10	94	Letm1	leucine zipper-EF-hand containing transmembrane protein 1		46	89	Ubxn2b	UBX domain protein 2B		28	88	Rab6a	RAB6A, member RAS oncogene family							26	83	Pde1c	phosphodiesterase 1C
76	91	Ogdh	oxoglutarate (alpha-ketoglutarate) dehydrogenase (lipoamide)		47	88	Thbs2	thrombospondin 2		51	80	Errfi1	ERBB receptor feedback inhibitor 1		18	95	Ide	insulin degrading enzyme		83	82	Arl13b	ADP-ribosylation factor-like 13B		11	93	Hs6st2	heparan sulfate 6-O-sulfotransferase 2		47	88	Thbs2	thrombospondin 2		29	88	Slc5a7	solute carrier family 5 (sodium/choline cotransporter), member 7							27	82	Oprm1	opioid receptor, mu 1
77	91	Zfp449	zinc finger protein 449		48	88	Ppapdc1b	phosphatidic acid phosphatase type 2 domain containing 1B		1	100	Tshz3	teashirt zinc finger homeobox 3		19	95	RGD1309079	similar to Ab2-095		84	82	Klhl32	kelch-like family member 32		12	92	Nova1	neuro-oncological ventral antigen 1		48	88	Ppapdc1b	phosphatidic acid phosphatase type 2 domain containing 1B		30	87	Pmch	pro-melanin-concentrating hormone							28	81	Ubtd2	ubiquitin domain containing 2
78	91	Vmp1	vacuole membrane protein 1		49	88	Ptpn4	protein tyrosine phosphatase, non-receptor type 4		2	98	Fam46a	family with sequence similarity 46, member A		20	95	Gpcpd1	glycerophosphocholine phosphodiesterase GDE1 homolog (S. cerevisiae)		85	82	Igf2bp1	insulin-like growth factor 2 mRNA binding protein 1		13	92	Frmd4b	FERM domain containing 4B		49	88	Ptpn4	protein tyrosine phosphatase, non-receptor type 4		31	87	Rock2	Rho-associated coiled-coil containing protein kinase 2							29	81	Itgav	integrin, alpha V
79	91	Cadps	Ca++-dependent secretion activator		50	88	Kmt2e	lysine (K)-specific methyltransferase 2E		3	98	Rapgef2	Rap guanine nucleotide exchange factor (GEF) 2		21	95	Ier5	immediate early response 5		86	81	Epb41l1	erythrocyte membrane protein band 4.1-like 1		14	91	Tspan3	tetraspanin 3		50	88	Kmt2e	lysine (K)-specific methyltransferase 2E		32	87	Rai1	retinoic acid induced 1							30	81	Rabl3	RAB, member of RAS oncogene family-like 3
80	91	Naa11	N(alpha)-acetyltransferase 11, NatA catalytic subunit		51	88	Ccnj	cyclin J		4	98	Zdhhc23	zinc finger, DHHC-type containing 23		22	95	Med13	mediator complex subunit 13		87	81	Herpud1	homocysteine-inducible, endoplasmic reticulum stress-inducible, ubiquitin-like domain member 1		15	90	Tmem30a	transmembrane protein 30A		51	88	Ccnj	cyclin J		33	86	Bcl11a	B-cell CLL/lymphoma 11A (zinc finger protein)							31	81	Gabrg2	gamma-aminobutyric acid (GABA) A receptor, gamma 2
81	91	Ror1	receptor tyrosine kinase-like orphan receptor 1		52	87	Prepl	prolyl endopeptidase-like		5	98	Nfat5	nuclear factor of activated T-cells 5, tonicity-responsive		23	94	Pura	purine rich element binding protein A		88	81	Pip4k2b	phosphatidylinositol-5-phosphate 4-kinase, type II, beta		16	90	Actr6	ARP6 actin-related protein 6 homolog (yeast)		52	87	Prepl	prolyl endopeptidase-like		34	86	Fam196a	family with sequence similarity 196, member A							32	81	Hecw2	HECT, C2 and WW domain containing E3 ubiquitin protein ligase 2
82	91	Gk	glycerol kinase		53	87	Slc2a13	solute carrier family 2 (facilitated glucose transporter), member 13		6	98	Sbno1	strawberry notch homolog 1 (Drosophila)		24	94	Lats1	large tumor suppressor kinase 1		89	81	Btrc	beta-transducin repeat containing E3 ubiquitin protein ligase		17	89	Nek9	NIMA-related kinase 9		53	87	Slc2a13	solute carrier family 2 (facilitated glucose transporter), member 13		35	85	Rad23b	RAD23 homolog B (S. cerevisiae)							33	80	LOC100912573	membrane-spanning 4-domains subfamily A member 6B-like
83	91	Lpar1	lysophosphatidic acid receptor 1		54	87	St7l	suppression of tumorigenicity 7-like		7	98	Gpr85	G protein-coupled receptor 85		25	93	Timm44	translocase of inner mitochondrial membrane 44 homolog (yeast)		90	81	Rap1b	RAP1B, member of RAS oncogene family		18	89	Cenpi	centromere protein I		54	87	St7l	suppression of tumorigenicity 7-like		36	85	Arpc1b	actin related protein 2/3 complex, subunit 1B							34	80	Ms4a6bl	membrane-spanning 4-domains, subfamily A, member 6B-like
84	91	Epc2	enhancer of polycomb homolog 2 (Drosophila)		55	87	Echdc1	enoyl CoA hydratase domain containing 1		8	98	Zfp513	zinc finger protein 513		26	93	Ezh1	enhancer of zeste homolog 1 (Drosophila)		91	81	Fa2h	fatty acid 2-hydroxylase		19	87	Ms4a4c	membrane-spanning 4-domains, subfamily A, member 4C		55	87	Echdc1	enoyl CoA hydratase domain containing 1		37	83	Hs2st1	heparan sulfate 2-O-sulfotransferase 1							1	99	RGD1566359	similar to RIKEN cDNA B230219D22
85	90	Igf1r	insulin-like growth factor 1 receptor		56	86	Arhgap5	Rho GTPase activating protein 5		9	97	Yy1	YY1 transcription factor		27	93	Gabrg2	gamma-aminobutyric acid (GABA) A receptor, gamma 2		92	81	Xpnpep2	X-prolyl aminopeptidase (aminopeptidase P) 2, membrane-bound		20	87	RGD1309747	similar to KIAA0947 protein		56	86	Arhgap5	Rho GTPase activating protein 5		38	83	Fv1	Friend virus susceptibility 1							2	97	Kpna1	karyopherin alpha 1
86	90	LOC100912215	GAS2-like protein 2-like		57	86	Bloc1s6	biogenesis of lysosomal organelles complex-1, subunit 6, pallidin		10	97	Tmem52b	transmembrane protein 52B		28	93	Cpeb4	cytoplasmic polyadenylation element binding protein 4		93	81	Ptbp3	polypyrimidine tract binding protein 3		21	86	Clec1a	C-type lectin domain family 1, member A		57	86	Bloc1s6	biogenesis of lysosomal organelles complex-1, subunit 6, pallidin		39	82	Arpc5	actin related protein 2/3 complex, subunit 5							3	96	Cpa4	carboxypeptidase A4
87	90	RGD1310495	similar to KIAA1919 protein		58	86	Rb1cc1	RB1-inducible coiled-coil 1		11	97	Nucks1	nuclear casein kinase and cyclin-dependent kinase substrate 1		29	93	Zdhhc3	zinc finger, DHHC-type containing 3		94	81	Emilin3	elastin microfibril interfacer 3		22	86	Mrpl35	mitochondrial ribosomal protein L35		58	86	Rb1cc1	RB1-inducible coiled-coil 1		40	82	Hdhd2	haloacid dehalogenase-like hydrolase domain containing 2							4	95	Bmper	BMP-binding endothelial regulator
88	90	Pabpc4l	poly(A) binding protein, cytoplasmic 4-like		59	85	Edem3	ER degradation enhancer, mannosidase alpha-like 3		12	97	Prpf4b	pre-mRNA processing factor 4B		30	93	Rngtt	RNA guanylyltransferase and 5'-phosphatase		95	80	Fndc3a	fibronectin type III domain containing 3a		23	86	Wwp1	WW domain containing E3 ubiquitin protein ligase 1		59	85	Edem3	ER degradation enhancer, mannosidase alpha-like 3		41	82	LOC687465	hypothetical protein LOC687465							5	95	Cers6	ceramide synthase 6
89	90	Stard7	StAR-related lipid transfer (START) domain containing 7		60	85	LOC100909825	probable isocitrate dehydrogenase [NAD] gamma 2, mitochondrial-like		13	96	Suclg2	succinate-CoA ligase, GDP-forming, beta subunit		31	93	Kcnh7	potassium voltage-gated channel, subfamily H (eag-related), member 7		96	80	Pbrm1	polybromo 1		24	84	Lrp12	low density lipoprotein receptor-related protein 12		60	85	LOC100909825	probable isocitrate dehydrogenase [NAD] gamma 2, mitochondrial-like		42	82	Ryr2	ryanodine receptor 2, cardiac							6	95	Cisd2	CDGSH iron sulfur domain 2
90	90	Luzp1	leucine zipper protein 1		61	85	Lrrc55	leucine rich repeat containing 55		14	96	Mtdh	metadherin		32	92	Vamp4	vesicle-associated membrane protein 4		97	80	Eps15	epidermal growth factor receptor pathway substrate 15		25	83	Aff2	AF4/FMR2 family, member 2		61	85	Lrrc55	leucine rich repeat containing 55		43	82	Otud4	OTU domain containing 4							7	95	Ptprb	protein tyrosine phosphatase, receptor type, B
91	90	Rap1a	RAP1A, member of RAS oncogene family		62	85	Enc1	ectodermal-neural cortex 1		15	96	Nfatc3	nuclear factor of activated T-cells, cytoplasmic, calcineurin-dependent 3		33	92	Epha7	Eph receptor A7		98	80	Fktn	fukutin		26	83	Pde1c	phosphodiesterase 1C		62	85	Enc1	ectodermal-neural cortex 1		44	81	Sh3bgrl	SH3 domain binding glutamic acid-rich protein like							8	94	Gata3	GATA binding protein 3
92	90	Slc39a10	solute carrier family 39 (zinc transporter), member 10		63	85	Fam84b	family with sequence similarity 84, member B		16	95	Dpysl2	dihydropyrimidinase-like 2		34	92	Vgll4	vestigial like 4 (Drosophila)		99	80	Canx	calnexin		27	82	Oprm1	opioid receptor, mu 1		63	85	Fam84b	family with sequence similarity 84, member B		45	81	Dnajc21	DnaJ (Hsp40) homolog, subfamily C, member 21							9	94	Foxn3	forkhead box N3
93	90	Kat2a	K(lysine) acetyltransferase 2A		64	85	Cdan1	codanin 1		17	95	Kbtbd8	kelch repeat and BTB (POZ) domain containing 8		35	92	Sirt7	sirtuin 7		100	80	Cbx7	chromobox homolog 7		28	81	Ubtd2	ubiquitin domain containing 2		64	85	Cdan1	codanin 1		46	81	Cbfb	core-binding factor, beta subunit							10	94	Letm1	leucine zipper-EF-hand containing transmembrane protein 1
94	90	Wnt2	wingless-type MMTV integration site family member 2		65	84	Dusp18	dual specificity phosphatase 18		18	95	Ide	insulin degrading enzyme		36	91	Kctd6	potassium channel tetramerization domain containing 6		1	100	Nfkbiz	nuclear factor of kappa light polypeptide gene enhancer in B-cells inhibitor, zeta		29	81	Itgav	integrin, alpha V		65	84	Dusp18	dual specificity phosphatase 18		47	81	Bnip2	BCL2/adenovirus E1B interacting protein 2							11	93	Hs6st2	heparan sulfate 6-O-sulfotransferase 2
95	90	Otud7a	OTU domain containing 7A		66	84	Ca1	carbonic anhydrase I		19	95	RGD1309079	similar to Ab2-095		37	91	LOC100909688	zinc finger protein 43-like		2	97	Kpna3	karyopherin alpha 3		30	81	Rabl3	RAB, member of RAS oncogene family-like 3		66	84	Ca1	carbonic anhydrase I		48	81	Exoc3	exocyst complex component 3							12	92	Nova1	neuro-oncological ventral antigen 1
96	89	Ell2	elongation factor RNA polymerase II 2		67	84	Mtmr3	myotubularin related protein 3		20	95	Gpcpd1	glycerophosphocholine phosphodiesterase GDE1 homolog (S. cerevisiae)		38	91	Capn6	calpain 6		3	95	Mbnl3	muscleblind-like splicing regulator 3		31	81	Gabrg2	gamma-aminobutyric acid (GABA) A receptor, gamma 2		67	84	Mtmr3	myotubularin related protein 3		49	81	Hnrnpu	heterogeneous nuclear ribonucleoprotein U							13	92	Frmd4b	FERM domain containing 4B
97	89	Arf2	ADP-ribosylation factor 2		68	84	LOC102551035	serine/arginine repetitive matrix protein 4-like		21	95	Ier5	immediate early response 5		39	91	Brinp3	bone morphogenetic protein/retinoic acid inducible neural-specific 3		4	94	Smarce1	SWI/SNF related, matrix associated, actin dependent regulator of chromatin, subfamily e, member 1		32	81	Hecw2	HECT, C2 and WW domain containing E3 ubiquitin protein ligase 2		68	84	LOC102551035	serine/arginine repetitive matrix protein 4-like		50	80	R3hdm1	R3H domain containing 1							14	91	Tspan3	tetraspanin 3
98	89	Bnc2	basonuclin 2		69	84	Ago1	argonaute RISC catalytic component 1		22	95	Med13	mediator complex subunit 13		40	91	Strn3	striatin, calmodulin binding protein 3		5	94	Hivep2	human immunodeficiency virus type I enhancer binding protein 2		33	80	LOC100912573	membrane-spanning 4-domains subfamily A member 6B-like		69	84	Ago1	argonaute RISC catalytic component 1		51	80	Pura	purine rich element binding protein A							15	90	Tmem30a	transmembrane protein 30A
99	89	Wasl	Wiskott-Aldrich syndrome-like		70	84	Mmgt1	membrane magnesium transporter 1		23	94	Pura	purine rich element binding protein A		41	90	Golga3	golgin A3		6	94	Rps6ka6	ribosomal protein S6 kinase polypeptide 6		34	80	Ms4a6bl	membrane-spanning 4-domains, subfamily A, member 6B-like		70	84	Mmgt1	membrane magnesium transporter 1		52	80	Gpr158	G protein-coupled receptor 158							16	90	Actr6	ARP6 actin-related protein 6 homolog (yeast)
100	89	Mier1	mesoderm induction early response 1, transcriptional regulator		71	84	Rassf4	Ras association (RalGDS/AF-6) domain family member 4		24	94	Lats1	large tumor suppressor kinase 1		42	90	Ube2d2	ubiquitin-conjugating enzyme E2D 2		7	92	Trip4	thyroid hormone receptor interactor 4		1	100	Ccdc88a	coiled coil domain containing 88A		71	84	Rassf4	Ras association (RalGDS/AF-6) domain family member 4		53	80	Gltscr1l	GLTSCR1-like							17	89	Nek9	NIMA-related kinase 9
101	89	Brcc3	BRCA1/BRCA2-containing complex, subunit 3		72	83	Arhgap42	Rho GTPase activating protein 42		25	93	Timm44	translocase of inner mitochondrial membrane 44 homolog (yeast)		43	90	Pum2	pumilio RNA-binding family member 2		8	89	Ranbp1	RAN binding protein 1		2	100	Mier3	mesoderm induction early response 1, family member 3		72	83	Arhgap42	Rho GTPase activating protein 42		1	100	Akap10	A kinase (PRKA) anchor protein 10							18	89	Cenpi	centromere protein I
102	88	Phf20	PHD finger protein 20		73	83	Tc2n	tandem C2 domains, nuclear		26	93	Ezh1	enhancer of zeste homolog 1 (Drosophila)		44	89	Ugt2b1	UDP glucuronosyltransferase 2 family, polypeptide B1		9	88	Hiat1	hippocampus abundant transcript 1		3	100	Rbm17	RNA binding motif protein 17		73	83	Tc2n	tandem C2 domains, nuclear		2	100	Cpeb2	cytoplasmic polyadenylation element binding protein 2							19	87	Ms4a4c	membrane-spanning 4-domains, subfamily A, member 4C
103	88	Elavl2	ELAV like neuron-specific RNA binding protein 2		74	83	RGD1565058	similar to RIKEN cDNA 1700019M22		27	93	Gabrg2	gamma-aminobutyric acid (GABA) A receptor, gamma 2		45	89	Zfp148	zinc finger protein 148		10	88	Ctdspl2	CTD (carboxy-terminal domain, RNA polymerase II, polypeptide A) small phosphatase like 2		4	100	Itgb6	integrin, beta 6		74	83	RGD1565058	similar to RIKEN cDNA 1700019M22		3	100	Grk5	G protein-coupled receptor kinase 5							20	87	RGD1309747	similar to KIAA0947 protein
104	88	Brdt	bromodomain, testis-specific		75	83	Cbfa2t2	core-binding factor, runt domain, alpha subunit 2; translocated to, 2		28	93	Cpeb4	cytoplasmic polyadenylation element binding protein 4		46	89	Ubxn2b	UBX domain protein 2B		11	87	Naaa	N-acylethanolamine acid amidase		5	100	Ganc	glucosidase, alpha; neutral C		75	83	Cbfa2t2	core-binding factor, runt domain, alpha subunit 2; translocated to, 2		4	100	St18	suppression of tumorigenicity 18							21	86	Clec1a	C-type lectin domain family 1, member A
105	88	Prdm1	PR domain containing 1, with ZNF domain		76	83	Hsd11b2	hydroxysteroid 11-beta dehydrogenase 2		29	93	Zdhhc3	zinc finger, DHHC-type containing 3		47	88	Thbs2	thrombospondin 2		12	87	Yipf5	Yip1 domain family, member 5		6	100	Pdlim5	PDZ and LIM domain 5		76	83	Hsd11b2	hydroxysteroid 11-beta dehydrogenase 2		5	100	Terf1	telomeric repeat binding factor (NIMA-interacting) 1							22	86	Mrpl35	mitochondrial ribosomal protein L35
106	88	Atp1b4	ATPase, (Na+)/K+ transporting, beta 4 polypeptide		77	83	Robo2	roundabout, axon guidance receptor, homolog 2 (Drosophila)		30	93	Rngtt	RNA guanylyltransferase and 5'-phosphatase		48	88	Ppapdc1b	phosphatidic acid phosphatase type 2 domain containing 1B		13	87	Syncrip	synaptotagmin binding, cytoplasmic RNA interacting protein		7	100	Rps6kb1	ribosomal protein S6 kinase, polypeptide 1		77	83	Robo2	roundabout, axon guidance receptor, homolog 2 (Drosophila)		6	99	Nfya	nuclear transcription factor-Y alpha							23	86	Wwp1	WW domain containing E3 ubiquitin protein ligase 1
107	88	Tle4	transducin-like enhancer of split 4 (E(sp1) homolog, Drosophila)		78	83	Ncoa7	nuclear receptor coactivator 7		31	93	Kcnh7	potassium voltage-gated channel, subfamily H (eag-related), member 7		49	88	Ptpn4	protein tyrosine phosphatase, non-receptor type 4		14	87	Hmgn2	high mobility group nucleosome binding domain 2		8	100	Bora	bora, aurora kinase A activator		78	83	Ncoa7	nuclear receptor coactivator 7		7	99	Snca	synuclein, alpha (non A4 component of amyloid precursor)							24	84	Lrp12	low density lipoprotein receptor-related protein 12
108	88	Agtpbp1	ATP/GTP binding protein 1		79	83	LOC102546630	protein gar2-like		32	92	Vamp4	vesicle-associated membrane protein 4		50	88	Kmt2e	lysine (K)-specific methyltransferase 2E		15	85	RGD1563325	similar to hypothetical protein MGC17943		9	100	Cacna1b	calcium channel, voltage-dependent, N type, alpha 1B subunit		79	83	LOC102546630	protein gar2-like		8	99	Slc4a7	solute carrier family 4, sodium bicarbonate cotransporter, member 7							25	83	Aff2	AF4/FMR2 family, member 2
109	88	Cyp3a2	cytochrome P450, family 3, subfamily a, polypeptide 2		80	83	LOC102557159	protein gar2-like		33	92	Epha7	Eph receptor A7		51	88	Ccnj	cyclin J		16	84	Ispd	isoprenoid synthase domain containing		10	99	Rnmt	RNA (guanine-7-) methyltransferase		80	83	LOC102557159	protein gar2-like		9	99	Zfp770	zinc finger protein 770							26	83	Pde1c	phosphodiesterase 1C
110	88	Rab27a	RAB27A, member RAS oncogene family		81	82	Slc26a6	solute carrier family 26 (anion exchanger), member 6		34	92	Vgll4	vestigial like 4 (Drosophila)		52	87	Prepl	prolyl endopeptidase-like		17	84	Ubn2	ubinuclein 2		11	99	Gxylt1	glucoside xylosyltransferase 1		81	82	Slc26a6	solute carrier family 26 (anion exchanger), member 6		10	99	Gabrb2	gamma-aminobutyric acid (GABA) A receptor, beta 2							27	82	Oprm1	opioid receptor, mu 1
111	87	LOC102552988	uncharacterized LOC102552988		82	82	Rhoa	ras homolog family member A		35	92	Sirt7	sirtuin 7		53	87	Slc2a13	solute carrier family 2 (facilitated glucose transporter), member 13		18	83	Ccnc	cyclin C		12	99	Ankrd28	ankyrin repeat domain 28		82	82	Rhoa	ras homolog family member A		11	99	Ric3	RIC3 acetylcholine receptor chaperone							28	81	Ubtd2	ubiquitin domain containing 2
112	87	Tbc1d1	TBC1 (tre-2/USP6, BUB2, cdc16) domain family, member 1		83	82	Arl13b	ADP-ribosylation factor-like 13B		36	91	Kctd6	potassium channel tetramerization domain containing 6		54	87	St7l	suppression of tumorigenicity 7-like		19	83	Sybu	syntabulin (syntaxin-interacting)		13	99	Purg	purine-rich element binding protein G		83	82	Arl13b	ADP-ribosylation factor-like 13B		12	99	RGD1309748	similar to CG4768-PA							29	81	Itgav	integrin, alpha V
113	87	Gapvd1	GTPase activating protein and VPS9 domains 1		84	82	Klhl32	kelch-like family member 32		37	91	LOC100909688	zinc finger protein 43-like		55	87	Echdc1	enoyl CoA hydratase domain containing 1		20	81	Cul3	cullin 3		14	99	Eya4	eyes absent homolog 4 (Drosophila)		84	82	Klhl32	kelch-like family member 32		13	99	Unc5d	unc-5 homolog D (C. elegans)							30	81	Rabl3	RAB, member of RAS oncogene family-like 3
114	87	Pigo	phosphatidylinositol glycan anchor biosynthesis, class O		85	82	Igf2bp1	insulin-like growth factor 2 mRNA binding protein 1		38	91	Capn6	calpain 6		56	86	Arhgap5	Rho GTPase activating protein 5		21	81	Rictor	RPTOR independent companion of MTOR, complex 2		15	99	Megf10	multiple EGF-like domains 10		85	82	Igf2bp1	insulin-like growth factor 2 mRNA binding protein 1		14	99	Ptprb	protein tyrosine phosphatase, receptor type, B							31	81	Gabrg2	gamma-aminobutyric acid (GABA) A receptor, gamma 2
115	87	Lingo2	leucine rich repeat and Ig domain containing 2		86	81	Epb41l1	erythrocyte membrane protein band 4.1-like 1		39	91	Brinp3	bone morphogenetic protein/retinoic acid inducible neural-specific 3		57	86	Bloc1s6	biogenesis of lysosomal organelles complex-1, subunit 6, pallidin		22	81	Ppp2r3a	protein phosphatase 2, regulatory subunit B'', alpha		16	99	Stox2	storkhead box 2		86	81	Epb41l1	erythrocyte membrane protein band 4.1-like 1		15	99	Bcl11a	B-cell CLL/lymphoma 11A (zinc finger protein)							32	81	Hecw2	HECT, C2 and WW domain containing E3 ubiquitin protein ligase 2
116	87	Rock2	Rho-associated coiled-coil containing protein kinase 2		87	81	Herpud1	homocysteine-inducible, endoplasmic reticulum stress-inducible, ubiquitin-like domain member 1		40	91	Strn3	striatin, calmodulin binding protein 3		58	86	Rb1cc1	RB1-inducible coiled-coil 1		23	80	Pou2f1	POU class 2 homeobox 1		17	99	Pptc7	PTC7 protein phosphatase homolog (S. cerevisiae)		87	81	Herpud1	homocysteine-inducible, endoplasmic reticulum stress-inducible, ubiquitin-like domain member 1		16	98	Slc5a7	solute carrier family 5 (sodium/choline cotransporter), member 7							33	80	LOC100912573	membrane-spanning 4-domains subfamily A member 6B-like
117	87	2017-03-04	membrane-associated ring finger (C3HC4) 4, E3 ubiquitin protein ligase		88	81	Pip4k2b	phosphatidylinositol-5-phosphate 4-kinase, type II, beta		41	90	Golga3	golgin A3		59	85	Edem3	ER degradation enhancer, mannosidase alpha-like 3		24	80	Clcn3	chloride channel, voltage-sensitive 3		18	99	Prkx	protein kinase, X-linked		88	81	Pip4k2b	phosphatidylinositol-5-phosphate 4-kinase, type II, beta		17	98	Sgpp1	sphingosine-1-phosphate phosphatase 1							34	80	Ms4a6bl	membrane-spanning 4-domains, subfamily A, member 6B-like
118	87	Eya1	eyes absent homolog 1 (Drosophila)		89	81	Btrc	beta-transducin repeat containing E3 ubiquitin protein ligase		42	90	Ube2d2	ubiquitin-conjugating enzyme E2D 2		60	85	LOC100909825	probable isocitrate dehydrogenase [NAD] gamma 2, mitochondrial-like		1	100	Rbms1	RNA binding motif, single stranded interacting protein 1		19	98	Brcc3	BRCA1/BRCA2-containing complex, subunit 3		89	81	Btrc	beta-transducin repeat containing E3 ubiquitin protein ligase		18	98	Kctd13	potassium channel tetramerization domain containing 13
119	86	Kmt2a	lysine (K)-specific methyltransferase 2A		90	81	Rap1b	RAP1B, member of RAS oncogene family		43	90	Pum2	pumilio RNA-binding family member 2		61	85	Lrrc55	leucine rich repeat containing 55		2	100	Mtf2	metal response element binding transcription factor 2		20	98	Scai	suppressor of cancer cell invasion		90	81	Rap1b	RAP1B, member of RAS oncogene family		19	98	Pdpk1	3-phosphoinositide dependent protein kinase-1
120	86	Rab28	RAB28, member RAS oncogene family		91	81	Fa2h	fatty acid 2-hydroxylase		44	89	Ugt2b1	UDP glucuronosyltransferase 2 family, polypeptide B1		62	85	Enc1	ectodermal-neural cortex 1		3	100	Tnrc6a	trinucleotide repeat containing 6a		21	98	Ctdspl2	CTD (carboxy-terminal domain, RNA polymerase II, polypeptide A) small phosphatase like 2		91	81	Fa2h	fatty acid 2-hydroxylase		20	98	Ptprf	protein tyrosine phosphatase, receptor type, F
121	86	LOC100365935	rCG22129-like		92	81	Xpnpep2	X-prolyl aminopeptidase (aminopeptidase P) 2, membrane-bound		45	89	Zfp148	zinc finger protein 148		63	85	Fam84b	family with sequence similarity 84, member B		4	99	Ppp2r5a	protein phosphatase 2, regulatory subunit B', alpha		22	98	Nr3c2	nuclear receptor subfamily 3, group C, member 2		92	81	Xpnpep2	X-prolyl aminopeptidase (aminopeptidase P) 2, membrane-bound		21	98	Dpys	dihydropyrimidinase
122	86	Fam196a	family with sequence similarity 196, member A		93	81	Ptbp3	polypyrimidine tract binding protein 3		46	89	Ubxn2b	UBX domain protein 2B		64	85	Cdan1	codanin 1		5	99	Arhgap5	Rho GTPase activating protein 5		23	98	Tmem161b	transmembrane protein 161B		93	81	Ptbp3	polypyrimidine tract binding protein 3		22	98	Cdh5	cadherin 5
123	86	Rgs8	regulator of G-protein signaling 8		94	81	Emilin3	elastin microfibril interfacer 3		47	88	Thbs2	thrombospondin 2		65	84	Dusp18	dual specificity phosphatase 18		6	98	Crim1	cysteine rich transmembrane BMP regulator 1 (chordin like)		24	98	Topors	topoisomerase I binding, arginine/serine-rich, E3 ubiquitin protein ligase		94	81	Emilin3	elastin microfibril interfacer 3		23	98	Cbfb	core-binding factor, beta subunit
124	86	L3mbtl2	l(3)mbt-like 2 (Drosophila)		95	80	Fndc3a	fibronectin type III domain containing 3a		48	88	Ppapdc1b	phosphatidic acid phosphatase type 2 domain containing 1B		66	84	Ca1	carbonic anhydrase I		7	98	Irx2	iroquois homeobox 2		25	98	Ppp3ca	protein phosphatase 3, catalytic subunit, alpha isozyme		95	80	Fndc3a	fibronectin type III domain containing 3a		24	97	Bnip2	BCL2/adenovirus E1B interacting protein 2
125	86	Scai	suppressor of cancer cell invasion		96	80	Pbrm1	polybromo 1		49	88	Ptpn4	protein tyrosine phosphatase, non-receptor type 4		67	84	Mtmr3	myotubularin related protein 3		8	98	Fbxo30	F-box protein 30		26	98	Hoxd13	homeo box D13		96	80	Pbrm1	polybromo 1		25	97	Cmpk1	cytidine monophosphate (UMP-CMP) kinase 1
126	85	U2surp	U2 snRNP-associated SURP domain containing		97	80	Eps15	epidermal growth factor receptor pathway substrate 15		50	88	Kmt2e	lysine (K)-specific methyltransferase 2E		68	84	LOC102551035	serine/arginine repetitive matrix protein 4-like		9	98	Riok3	RIO kinase 3		27	98	Lrrtm3	leucine rich repeat transmembrane neuronal 3		97	80	Eps15	epidermal growth factor receptor pathway substrate 15		26	97	Acnat2	acyl-coenzyme A amino acid N-acyltransferase 2
127	85	RGD1309079	similar to Ab2-095		98	80	Fktn	fukutin		51	88	Ccnj	cyclin J		69	84	Ago1	argonaute RISC catalytic component 1		10	98	Ppp4r4	protein phosphatase 4, regulatory subunit 4		28	97	Zfp644	zinc finger protein 644		98	80	Fktn	fukutin		27	97	Rab6a	RAB6A, member RAS oncogene family
128	85	Map3k7	mitogen activated protein kinase kinase kinase 7		99	80	Canx	calnexin		52	87	Prepl	prolyl endopeptidase-like		70	84	Mmgt1	membrane magnesium transporter 1		11	97	Hecw2	HECT, C2 and WW domain containing E3 ubiquitin protein ligase 2		29	97	Slc16a7	solute carrier family 16 (monocarboxylate transporter), member 7		99	80	Canx	calnexin		28	97	Rala	v-ral simian leukemia viral oncogene homolog A (ras related)
129	85	Sgtb	small glutamine-rich tetratricopeptide repeat (TPR)-containing, beta		100	80	Cbx7	chromobox homolog 7		53	87	Slc2a13	solute carrier family 2 (facilitated glucose transporter), member 13		71	84	Rassf4	Ras association (RalGDS/AF-6) domain family member 4		12	97	Ptprb	protein tyrosine phosphatase, receptor type, B		30	97	Ccar1	cell division cycle and apoptosis regulator 1		100	80	Cbx7	chromobox homolog 7		29	97	Flrt2	fibronectin leucine rich transmembrane protein 2
130	85	RT1-S3	RT1 class Ib, locus S3		1	100	Tshz3	teashirt zinc finger homeobox 3		54	87	St7l	suppression of tumorigenicity 7-like		72	83	Arhgap42	Rho GTPase activating protein 42		13	97	RGD1309747	similar to KIAA0947 protein		31	97	Fam107b	family with sequence similarity 107, member B		1	100	Tshz3	teashirt zinc finger homeobox 3		30	97	Ccdc43	coiled-coil domain containing 43
131	85	Arpc1b	actin related protein 2/3 complex, subunit 1B		2	98	Fam46a	family with sequence similarity 46, member A		55	87	Echdc1	enoyl CoA hydratase domain containing 1		73	83	Tc2n	tandem C2 domains, nuclear		14	96	Ythdf3	YTH domain family, member 3		32	97	Mtf2	metal response element binding transcription factor 2		2	98	Fam46a	family with sequence similarity 46, member A		31	97	Gpr158	G protein-coupled receptor 158
132	85	Lmo3	LIM domain only 3		3	98	Rapgef2	Rap guanine nucleotide exchange factor (GEF) 2		56	86	Arhgap5	Rho GTPase activating protein 5		74	83	RGD1565058	similar to RIKEN cDNA 1700019M22		15	96	Eif5	eukaryotic translation initiation factor 5		33	97	Ptbp3	polypyrimidine tract binding protein 3		3	98	Rapgef2	Rap guanine nucleotide exchange factor (GEF) 2		32	97	LOC689437	similar to vitamin A-deficient testicular protein 11-like
133	85	LOC102556832	LIM domain only protein 3-like		4	98	Zdhhc23	zinc finger, DHHC-type containing 23		57	86	Bloc1s6	biogenesis of lysosomal organelles complex-1, subunit 6, pallidin		75	83	Cbfa2t2	core-binding factor, runt domain, alpha subunit 2; translocated to, 2		16	96	Mbnl2	muscleblind-like splicing regulator 2		34	97	Sike1	suppressor of IKBKE 1		4	98	Zdhhc23	zinc finger, DHHC-type containing 23		33	96	Ccar1	cell division cycle and apoptosis regulator 1
134	85	Slamf1	signaling lymphocytic activation molecule family member 1		5	98	Nfat5	nuclear factor of activated T-cells 5, tonicity-responsive		58	86	Rb1cc1	RB1-inducible coiled-coil 1		76	83	Hsd11b2	hydroxysteroid 11-beta dehydrogenase 2		17	96	Phox2b	paired-like homeobox 2b		35	96	Zbtb44	zinc finger and BTB domain containing 44		5	98	Nfat5	nuclear factor of activated T-cells 5, tonicity-responsive		34	96	Cpsf6	cleavage and polyadenylation specific factor 6, 68kDa
135	85	Pdgfra	platelet derived growth factor receptor, alpha polypeptide		6	98	Sbno1	strawberry notch homolog 1 (Drosophila)		59	85	Edem3	ER degradation enhancer, mannosidase alpha-like 3		77	83	Robo2	roundabout, axon guidance receptor, homolog 2 (Drosophila)		18	96	Ccdc126	coiled-coil domain containing 126		36	96	Tmed7	transmembrane emp24 protein transport domain containing 7		6	98	Sbno1	strawberry notch homolog 1 (Drosophila)		35	96	Dcun1d4	DCN1, defective in cullin neddylation 1, domain containing 4
136	84	Capza2	capping protein (actin filament) muscle Z-line, alpha 2		7	98	Gpr85	G protein-coupled receptor 85		60	85	LOC100909825	probable isocitrate dehydrogenase [NAD] gamma 2, mitochondrial-like		78	83	Ncoa7	nuclear receptor coactivator 7		19	95	Ppm1b	protein phosphatase, Mg2+/Mn2+ dependent, 1B		37	96	Rgd1310049	uncharacterized LOC292199		7	98	Gpr85	G protein-coupled receptor 85		36	96	Rai1	retinoic acid induced 1
137	84	Csf1	colony stimulating factor 1 (macrophage)		8	98	Zfp513	zinc finger protein 513		61	85	Lrrc55	leucine rich repeat containing 55		79	83	LOC102546630	protein gar2-like		20	95	Dync1li2	dynein, cytoplasmic 1 light intermediate chain 2		38	96	Nucks1	nuclear casein kinase and cyclin-dependent kinase substrate 1		8	98	Zfp513	zinc finger protein 513		37	96	Pmch	pro-melanin-concentrating hormone
138	84	Mdm4	Mdm4 p53 binding protein homolog (mouse)		9	97	Yy1	YY1 transcription factor		62	85	Enc1	ectodermal-neural cortex 1		80	83	LOC102557159	protein gar2-like		21	95	Zfp518b	zinc finger protein 518B		39	96	Hivep3	human immunodeficiency virus type I enhancer binding protein 3		9	97	Yy1	YY1 transcription factor		38	95	Tnpo1	transportin 1
139	84	Arhgef26	Rho guanine nucleotide exchange factor (GEF) 26		10	97	Tmem52b	transmembrane protein 52B		63	85	Fam84b	family with sequence similarity 84, member B		81	82	Slc26a6	solute carrier family 26 (anion exchanger), member 6		22	95	Lpp	LIM domain containing preferred translocation partner in lipoma		40	96	RGD1563746	similar to nuclear protein with a coiled coil-4 domain of bilaterial origin like (3L720)		10	97	Tmem52b	transmembrane protein 52B		39	95	Fubp1	far upstream element (FUSE) binding protein 1
140	84	LOC100910007	zinc finger protein 30-like		11	97	Nucks1	nuclear casein kinase and cyclin-dependent kinase substrate 1		64	85	Cdan1	codanin 1		82	82	Rhoa	ras homolog family member A		23	94	Ewsr1	EWS RNA-binding protein 1		41	96	Papolg	poly(A) polymerase gamma		11	97	Nucks1	nuclear casein kinase and cyclin-dependent kinase substrate 1		40	95	LOC687465	hypothetical protein LOC687465
141	84	Snx5	sorting nexin 5		12	97	Prpf4b	pre-mRNA processing factor 4B		65	84	Dusp18	dual specificity phosphatase 18		83	82	Arl13b	ADP-ribosylation factor-like 13B		24	94	Gda	guanine deaminase		42	95	Elavl4	ELAV like neuron-specific RNA binding protein 4		12	97	Prpf4b	pre-mRNA processing factor 4B		41	95	Rad23b	RAD23 homolog B (S. cerevisiae)
142	84	Lpgat1	lysophosphatidylglycerol acyltransferase 1		13	96	Suclg2	succinate-CoA ligase, GDP-forming, beta subunit		66	84	Ca1	carbonic anhydrase I		84	82	Klhl32	kelch-like family member 32		25	94	Gabrg1	gamma-aminobutyric acid (GABA) A receptor, gamma 1		43	95	Glrb	glycine receptor, beta		13	96	Suclg2	succinate-CoA ligase, GDP-forming, beta subunit		42	95	R3hdm1	R3H domain containing 1
143	84	Mtx2	metaxin 2		14	96	Mtdh	metadherin		67	84	Mtmr3	myotubularin related protein 3		85	82	Igf2bp1	insulin-like growth factor 2 mRNA binding protein 1		26	94	Hnrnph3	heterogeneous nuclear ribonucleoprotein H3 (2H9)		44	95	Casc4	cancer susceptibility candidate 4		14	96	Mtdh	metadherin		43	94	Dnajc21	DnaJ (Hsp40) homolog, subfamily C, member 21
144	84	Slc2a12	solute carrier family 2 (facilitated glucose transporter), member 12		15	96	Nfatc3	nuclear factor of activated T-cells, cytoplasmic, calcineurin-dependent 3		68	84	LOC102551035	serine/arginine repetitive matrix protein 4-like		86	81	Epb41l1	erythrocyte membrane protein band 4.1-like 1		27	94	Zhx1	zinc fingers and homeoboxes 1		45	95	Plcb1	phospholipase C, beta 1 (phosphoinositide-specific)		15	96	Nfatc3	nuclear factor of activated T-cells, cytoplasmic, calcineurin-dependent 3		44	94	Hdhd2	haloacid dehalogenase-like hydrolase domain containing 2
145	84	Cep170	centrosomal protein 170		16	95	Dpysl2	dihydropyrimidinase-like 2		69	84	Ago1	argonaute RISC catalytic component 1		87	81	Herpud1	homocysteine-inducible, endoplasmic reticulum stress-inducible, ubiquitin-like domain member 1		28	94	Kcnk1	potassium channel, subfamily K, member 1		46	95	Slc18a2	solute carrier family 18 (vesicular monoamine transporter), member 2		16	95	Dpysl2	dihydropyrimidinase-like 2		45	94	Adam22	ADAM metallopeptidase domain 22
146	84	Coq9	coenzyme Q9		17	95	Kbtbd8	kelch repeat and BTB (POZ) domain containing 8		70	84	Mmgt1	membrane magnesium transporter 1		88	81	Pip4k2b	phosphatidylinositol-5-phosphate 4-kinase, type II, beta		29	93	Nr4a3	nuclear receptor subfamily 4, group A, member 3		47	95	Lgi2	leucine-rich repeat LGI family, member 2		17	95	Kbtbd8	kelch repeat and BTB (POZ) domain containing 8		46	94	Arpc5	actin related protein 2/3 complex, subunit 5
147	83	Paip1	poly(A) binding protein interacting protein 1		18	95	Ide	insulin degrading enzyme		71	84	Rassf4	Ras association (RalGDS/AF-6) domain family member 4		89	81	Btrc	beta-transducin repeat containing E3 ubiquitin protein ligase		30	93	Tmed5	transmembrane emp24 protein transport domain containing 5		48	95	Ptprb	protein tyrosine phosphatase, receptor type, B		18	95	Ide	insulin degrading enzyme		47	94	Gltscr1l	GLTSCR1-like
148	83	Atg10	autophagy related 10		19	95	RGD1309079	similar to Ab2-095		72	83	Arhgap42	Rho GTPase activating protein 42		90	81	Rap1b	RAP1B, member of RAS oncogene family		31	92	Slain2	SLAIN motif family, member 2		49	94	Sobp	sine oculis-binding protein homolog (Drosophila)		19	95	RGD1309079	similar to Ab2-095		48	94	Hs2st1	heparan sulfate 2-O-sulfotransferase 1
149	83	Carhsp1	calcium regulated heat stable protein 1		20	95	Gpcpd1	glycerophosphocholine phosphodiesterase GDE1 homolog (S. cerevisiae)		73	83	Tc2n	tandem C2 domains, nuclear		91	81	Fa2h	fatty acid 2-hydroxylase		32	92	Rfx7	regulatory factor X, 7		50	94	Stk4	serine/threonine kinase 4		20	95	Gpcpd1	glycerophosphocholine phosphodiesterase GDE1 homolog (S. cerevisiae)		49	94	Prkd3	protein kinase D3
150	83	Lrrtm3	leucine rich repeat transmembrane neuronal 3		21	95	Ier5	immediate early response 5		74	83	RGD1565058	similar to RIKEN cDNA 1700019M22		92	81	Xpnpep2	X-prolyl aminopeptidase (aminopeptidase P) 2, membrane-bound		33	92	Mitd1	MIT, microtubule interacting and transport, domain containing 1		51	94	Actn4	actinin alpha 4		21	95	Ier5	immediate early response 5		50	94	Fv1	Friend virus susceptibility 1
151	83	Pramel3	preferentially expressed antigen in melanoma-like 3		22	95	Med13	mediator complex subunit 13		75	83	Cbfa2t2	core-binding factor, runt domain, alpha subunit 2; translocated to, 2		93	81	Ptbp3	polypyrimidine tract binding protein 3		34	92	Rps6ka6	ribosomal protein S6 kinase polypeptide 6		52	94	Ostf1	osteoclast stimulating factor 1		22	95	Med13	mediator complex subunit 13		51	94	Phip	pleckstrin homology domain interacting protein
152	83	LOC100912836	leucine-rich repeat-containing protein PRAME-like		23	94	Pura	purine rich element binding protein A		76	83	Hsd11b2	hydroxysteroid 11-beta dehydrogenase 2		94	81	Emilin3	elastin microfibril interfacer 3		35	91	Nr2c2	nuclear receptor subfamily 2, group C, member 2		53	94	LOC100362431	tetratricopeptide repeat domain 30B		23	94	Pura	purine rich element binding protein A		52	93	Ryr2	ryanodine receptor 2, cardiac
153	83	Szrd1	SUZ RNA binding domain containing 1		24	94	Lats1	large tumor suppressor kinase 1		77	83	Robo2	roundabout, axon guidance receptor, homolog 2 (Drosophila)		95	80	Fndc3a	fibronectin type III domain containing 3a		36	91	Dhx35	DEAH (Asp-Glu-Ala-His) box polypeptide 35		54	94	Slc39a10	solute carrier family 39 (zinc transporter), member 10		24	94	Lats1	large tumor suppressor kinase 1		53	93	Hnrnpu	heterogeneous nuclear ribonucleoprotein U
154	82	Mtmr4	myotubularin related protein 4		25	93	Timm44	translocase of inner mitochondrial membrane 44 homolog (yeast)		78	83	Ncoa7	nuclear receptor coactivator 7		96	80	Pbrm1	polybromo 1		37	91	Urb1	URB1 ribosome biogenesis 1 homolog (S. cerevisiae)		55	94	Acat1	acetyl-CoA acetyltransferase 1		25	93	Timm44	translocase of inner mitochondrial membrane 44 homolog (yeast)		54	93	Ube2q2	ubiquitin-conjugating enzyme E2Q family member 2
155	82	Nin	ninein (GSK3B interacting protein)		26	93	Ezh1	enhancer of zeste homolog 1 (Drosophila)		79	83	LOC102546630	protein gar2-like		97	80	Eps15	epidermal growth factor receptor pathway substrate 15		38	91	Pcdh7	protocadherin 7		56	94	Ubap1	ubiquitin-associated protein 1		26	93	Ezh1	enhancer of zeste homolog 1 (Drosophila)		55	93	Eif1a	eukaryotic translation initiation factor 1A
156	82	Plxdc2	plexin domain containing 2		27	93	Gabrg2	gamma-aminobutyric acid (GABA) A receptor, gamma 2		80	83	LOC102557159	protein gar2-like		98	80	Fktn	fukutin		39	90	Ebag9	estrogen receptor binding site associated, antigen, 9		57	94	Ptpn4	protein tyrosine phosphatase, non-receptor type 4		27	93	Gabrg2	gamma-aminobutyric acid (GABA) A receptor, gamma 2		56	93	Ndufaf4	NADH dehydrogenase (ubiquinone) complex I, assembly factor 4
157	82	Psen1	presenilin 1		28	93	Cpeb4	cytoplasmic polyadenylation element binding protein 4		81	82	Slc26a6	solute carrier family 26 (anion exchanger), member 6		99	80	Canx	calnexin		40	90	Lrrc40	leucine rich repeat containing 40		58	94	Med17	mediator complex subunit 17		28	93	Cpeb4	cytoplasmic polyadenylation element binding protein 4		57	93	Otud4	OTU domain containing 4
158	81	Ipo5	importin 5		29	93	Zdhhc3	zinc finger, DHHC-type containing 3		82	82	Rhoa	ras homolog family member A		100	80	Cbx7	chromobox homolog 7		41	90	Suco	SUN domain containing ossification factor		59	94	Rims2	regulating synaptic membrane exocytosis 2		29	93	Zdhhc3	zinc finger, DHHC-type containing 3		58	93	Sh3bgrl	SH3 domain binding glutamic acid-rich protein like
159	81	Purg	purine-rich element binding protein G		30	93	Rngtt	RNA guanylyltransferase and 5'-phosphatase		83	82	Arl13b	ADP-ribosylation factor-like 13B		1	100	Tshz3	teashirt zinc finger homeobox 3		42	90	Kctd1	potassium channel tetramerization domain containing 1		60	94	Slc25a24	solute carrier family 25 (mitochondrial carrier, phosphate carrier), member 24		30	93	Rngtt	RNA guanylyltransferase and 5'-phosphatase		59	93	Rpe	ribulose-5-phosphate-3-epimerase
160	81	Zfp329	zinc finger protein 329		31	93	Kcnh7	potassium voltage-gated channel, subfamily H (eag-related), member 7		84	82	Klhl32	kelch-like family member 32		2	98	Fam46a	family with sequence similarity 46, member A		43	89	Tll1	tolloid-like 1		61	93	Cp	ceruloplasmin (ferroxidase)		31	93	Kcnh7	potassium voltage-gated channel, subfamily H (eag-related), member 7		60	93	Pfn2	profilin 2
161	81	Exoc3	exocyst complex component 3		32	92	Vamp4	vesicle-associated membrane protein 4		85	82	Igf2bp1	insulin-like growth factor 2 mRNA binding protein 1		3	98	Rapgef2	Rap guanine nucleotide exchange factor (GEF) 2		44	89	Pax3	paired box 3		62	93	Slc25a27	solute carrier family 25, member 27		32	92	Vamp4	vesicle-associated membrane protein 4		61	93	Pura	purine rich element binding protein A
162	81	Mef2c	myocyte enhancer factor 2C		33	92	Epha7	Eph receptor A7		86	81	Epb41l1	erythrocyte membrane protein band 4.1-like 1		4	98	Zdhhc23	zinc finger, DHHC-type containing 23		45	89	Prdm13	PR domain containing 13		63	93	Hapln1	hyaluronan and proteoglycan link protein 1		33	92	Epha7	Eph receptor A7		62	93	Chd6	chromodomain helicase DNA binding protein 6
163	81	Dll4	delta-like 4 (Drosophila)		34	92	Vgll4	vestigial like 4 (Drosophila)		87	81	Herpud1	homocysteine-inducible, endoplasmic reticulum stress-inducible, ubiquitin-like domain member 1		5	98	Nfat5	nuclear factor of activated T-cells 5, tonicity-responsive		46	89	Tnks2	tankyrase, TRF1-interacting ankyrin-related ADP-ribose polymerase 2		64	93	Strn	striatin, calmodulin binding protein		34	92	Vgll4	vestigial like 4 (Drosophila)		63	92	RGD1311874	hypothetical LOC300751
164	80	Galnt4	UDP-N-acetyl-alpha-D-galactosamine:polypeptide N-acetylgalactosaminyltransferase 4 (GalNAc-T4)		35	92	Sirt7	sirtuin 7		88	81	Pip4k2b	phosphatidylinositol-5-phosphate 4-kinase, type II, beta		6	98	Sbno1	strawberry notch homolog 1 (Drosophila)		47	89	Pax6	paired box 6		65	93	Appl1	adaptor protein, phosphotyrosine interaction, PH domain and leucine zipper containing 1		35	92	Sirt7	sirtuin 7		64	92	Zfand6	zinc finger, AN1-type domain 6
165	80	Ptger3	prostaglandin E receptor 3 (subtype EP3)		36	91	Kctd6	potassium channel tetramerization domain containing 6		89	81	Btrc	beta-transducin repeat containing E3 ubiquitin protein ligase		7	98	Gpr85	G protein-coupled receptor 85		48	89	Bsdc1	BSD domain containing 1		66	93	Atp6v1a	ATPase, H+ transporting, lysosomal V1 subunit A		36	91	Kctd6	potassium channel tetramerization domain containing 6		65	92	Sft2d2	SFT2 domain containing 2
166	80	Itgb8	integrin, beta 8		37	91	LOC100909688	zinc finger protein 43-like		90	81	Rap1b	RAP1B, member of RAS oncogene family		8	98	Zfp513	zinc finger protein 513		49	89	Cnep1r1	CTD nuclear envelope phosphatase 1 regulatory subunit 1		67	93	Ncald	neurocalcin delta		37	91	LOC100909688	zinc finger protein 43-like		66	92	Add3	adducin 3 (gamma)
167	80	Fam149a	family with sequence similarity 149, member A		38	91	Capn6	calpain 6		91	81	Fa2h	fatty acid 2-hydroxylase		9	97	Yy1	YY1 transcription factor		50	88	Slc5a7	solute carrier family 5 (sodium/choline cotransporter), member 7		68	93	Kctd4	potassium channel tetramerization domain containing 4		38	91	Capn6	calpain 6		67	92	Bpgm	2,3-bisphosphoglycerate mutase
168	80	Tmem47	transmembrane protein 47		39	91	Brinp3	bone morphogenetic protein/retinoic acid inducible neural-specific 3		92	81	Xpnpep2	X-prolyl aminopeptidase (aminopeptidase P) 2, membrane-bound		10	97	Tmem52b	transmembrane protein 52B		51	88	H1f0	H1 histone family, member 0		69	93	Hmgxb4	HMG box domain containing 4		39	91	Brinp3	bone morphogenetic protein/retinoic acid inducible neural-specific 3		68	92	Fam49b	family with sequence similarity 49, member B
169	80	Tppp	tubulin polymerization promoting protein		40	91	Strn3	striatin, calmodulin binding protein 3		93	81	Ptbp3	polypyrimidine tract binding protein 3		11	97	Nucks1	nuclear casein kinase and cyclin-dependent kinase substrate 1		52	88	Phf3	PHD finger protein 3		70	92	Cdh7	cadherin 7, type 2		40	91	Strn3	striatin, calmodulin binding protein 3		69	92	Snap25	synaptosomal-associated protein 25
1	100	Arid2	AT rich interactive domain 2 (Arid-rfx like)		41	90	Golga3	golgin A3		94	81	Emilin3	elastin microfibril interfacer 3		12	97	Prpf4b	pre-mRNA processing factor 4B		53	88	Olr59	olfactory receptor 59		71	92	Mtmr6	myotubularin related protein 6		41	90	Golga3	golgin A3		70	92	Sema3a	sema domain, immunoglobulin domain (Ig), short basic domain, secreted, (semaphorin) 3A
2	99	Nfia	nuclear factor I/A		42	90	Ube2d2	ubiquitin-conjugating enzyme E2D 2		95	80	Fndc3a	fibronectin type III domain containing 3a		13	96	Suclg2	succinate-CoA ligase, GDP-forming, beta subunit		54	88	Wnt11	wingless-type MMTV integration site family, member 11		72	92	Galnt13	UDP-N-acetyl-alpha-D-galactosamine:polypeptide N-acetylgalactosaminyltransferase 13 (GalNAc-T13)		42	90	Ube2d2	ubiquitin-conjugating enzyme E2D 2		71	91	Manba	mannosidase, beta A, lysosomal
3	99	Xrn1	5'-3' exoribonuclease 1		43	90	Pum2	pumilio RNA-binding family member 2		96	80	Pbrm1	polybromo 1		14	96	Mtdh	metadherin		55	88	Rgn	regucalcin (senescence marker protein-30)		73	92	Nyap2	neuronal tyrosine-phosphorylated phosphoinositide-3-kinase adaptor 2		43	90	Pum2	pumilio RNA-binding family member 2		72	91	Dgat2	diacylglycerol O-acyltransferase 2
4	99	Bmpr2	bone morphogenetic protein receptor, type II (serine/threonine kinase)		44	89	Ugt2b1	UDP glucuronosyltransferase 2 family, polypeptide B1		97	80	Eps15	epidermal growth factor receptor pathway substrate 15		15	96	Nfatc3	nuclear factor of activated T-cells, cytoplasmic, calcineurin-dependent 3		56	87	Zfand4	zinc finger, AN1-type domain 4		74	92	Cpsf6	cleavage and polyadenylation specific factor 6, 68kDa		44	89	Ugt2b1	UDP glucuronosyltransferase 2 family, polypeptide B1		73	91	Ppp2ca	protein phosphatase 2, catalytic subunit, alpha isozyme
5	98	Gpr116	G protein-coupled receptor 116		45	89	Zfp148	zinc finger protein 148		98	80	Fktn	fukutin		16	95	Dpysl2	dihydropyrimidinase-like 2		57	87	Hipk1	homeodomain interacting protein kinase 1		75	92	Epha7	Eph receptor A7		45	89	Zfp148	zinc finger protein 148		74	91	Gas2l2	growth arrest-specific 2 like 2
6	98	Rab9b	RAB9B, member RAS oncogene family		46	89	Ubxn2b	UBX domain protein 2B		99	80	Canx	calnexin		17	95	Kbtbd8	kelch repeat and BTB (POZ) domain containing 8		58	87	Pikfyve	phosphoinositide kinase, FYVE finger containing		76	92	Papola	poly (A) polymerase alpha		46	89	Ubxn2b	UBX domain protein 2B		75	91	Tll1	tolloid-like 1
7	97	Atp2b2	ATPase, Ca++ transporting, plasma membrane 2		47	88	Thbs2	thrombospondin 2		100	80	Cbx7	chromobox homolog 7		18	95	Ide	insulin degrading enzyme		59	87	Slc41a2	solute carrier family 41 (magnesium transporter), member 2		77	92	Gpr155	G protein-coupled receptor 155		47	88	Thbs2	thrombospondin 2		76	91	Ogdh	oxoglutarate (alpha-ketoglutarate) dehydrogenase (lipoamide)
8	97	Grm3	glutamate receptor, metabotropic 3		48	88	Ppapdc1b	phosphatidic acid phosphatase type 2 domain containing 1B		1	100	Tshz3	teashirt zinc finger homeobox 3		19	95	RGD1309079	similar to Ab2-095		60	86	Cldn8	claudin 8		78	92	Actl6a	actin-like 6A		48	88	Ppapdc1b	phosphatidic acid phosphatase type 2 domain containing 1B		77	91	Zfp449	zinc finger protein 449
9	97	Angpt1	angiopoietin 1		49	88	Ptpn4	protein tyrosine phosphatase, non-receptor type 4		2	98	Fam46a	family with sequence similarity 46, member A		20	95	Gpcpd1	glycerophosphocholine phosphodiesterase GDE1 homolog (S. cerevisiae)		61	86	RGD1564894	similar to glycine-N-acyltransferase isoform a		79	92	Pmp2	peripheral myelin protein 2		49	88	Ptpn4	protein tyrosine phosphatase, non-receptor type 4		78	91	Vmp1	vacuole membrane protein 1
10	96	Arrdc3	arrestin domain containing 3		50	88	Kmt2e	lysine (K)-specific methyltransferase 2E		3	98	Rapgef2	Rap guanine nucleotide exchange factor (GEF) 2		21	95	Ier5	immediate early response 5		62	86	Efna3	ephrin A3		80	92	Kif5b	kinesin family member 5B		50	88	Kmt2e	lysine (K)-specific methyltransferase 2E		79	91	Cadps	Ca++-dependent secretion activator
11	95	Acly	ATP citrate lyase		51	88	Ccnj	cyclin J		4	98	Zdhhc23	zinc finger, DHHC-type containing 23		22	95	Med13	mediator complex subunit 13		63	86	Lrp8	low density lipoprotein receptor-related protein 8, apolipoprotein e receptor		81	92	Megf9	multiple EGF-like-domains 9		51	88	Ccnj	cyclin J		80	91	Naa11	N(alpha)-acetyltransferase 11, NatA catalytic subunit
12	94	Ibtk	inhibitor of Bruton agammaglobulinemia tyrosine kinase		52	87	Prepl	prolyl endopeptidase-like		5	98	Nfat5	nuclear factor of activated T-cells 5, tonicity-responsive		23	94	Pura	purine rich element binding protein A		64	86	Bfar	bifunctional apoptosis regulator		82	92	Dyrk2	dual-specificity tyrosine-(Y)-phosphorylation regulated kinase 2		52	87	Prepl	prolyl endopeptidase-like		81	91	Ror1	receptor tyrosine kinase-like orphan receptor 1
13	94	Amot	angiomotin		53	87	Slc2a13	solute carrier family 2 (facilitated glucose transporter), member 13		6	98	Sbno1	strawberry notch homolog 1 (Drosophila)		24	94	Lats1	large tumor suppressor kinase 1		65	86	Ankib1	ankyrin repeat and IBR domain containing 1		83	92	Nhs	Nance-Horan syndrome (congenital cataracts and dental anomalies)		53	87	Slc2a13	solute carrier family 2 (facilitated glucose transporter), member 13		82	91	Gk	glycerol kinase
14	94	Mfsd1	major facilitator superfamily domain containing 1		54	87	St7l	suppression of tumorigenicity 7-like		7	98	Gpr85	G protein-coupled receptor 85		25	93	Timm44	translocase of inner mitochondrial membrane 44 homolog (yeast)		66	85	Cdkl5	cyclin-dependent kinase-like 5		84	92	Rsbn1	round spermatid basic protein 1		54	87	St7l	suppression of tumorigenicity 7-like		83	91	Lpar1	lysophosphatidic acid receptor 1
15	94	Tle4	transducin-like enhancer of split 4 (E(sp1) homolog, Drosophila)		55	87	Echdc1	enoyl CoA hydratase domain containing 1		8	98	Zfp513	zinc finger protein 513		26	93	Ezh1	enhancer of zeste homolog 1 (Drosophila)		67	85	Trim30	tripartite motif-containing 30		85	92	Ints10	integrator complex subunit 10		55	87	Echdc1	enoyl CoA hydratase domain containing 1		84	91	Epc2	enhancer of polycomb homolog 2 (Drosophila)
16	93	Phip	pleckstrin homology domain interacting protein		56	86	Arhgap5	Rho GTPase activating protein 5		9	97	Yy1	YY1 transcription factor		27	93	Gabrg2	gamma-aminobutyric acid (GABA) A receptor, gamma 2		68	85	Lyplal1	lysophospholipase-like 1		86	92	Taf5	TAF5 RNA polymerase II, TATA box binding protein (TBP)-associated factor		56	86	Arhgap5	Rho GTPase activating protein 5		85	90	Igf1r	insulin-like growth factor 1 receptor
17	93	Gpbp1	GC-rich promoter binding protein 1		57	86	Bloc1s6	biogenesis of lysosomal organelles complex-1, subunit 6, pallidin		10	97	Tmem52b	transmembrane protein 52B		28	93	Cpeb4	cytoplasmic polyadenylation element binding protein 4		69	85	Mtfmt	mitochondrial methionyl-tRNA formyltransferase		87	91	Sema6a	sema domain, transmembrane domain (TM), and cytoplasmic domain, (semaphorin) 6A		57	86	Bloc1s6	biogenesis of lysosomal organelles complex-1, subunit 6, pallidin		86	90	LOC100912215	GAS2-like protein 2-like
18	93	Rmnd5a	required for meiotic nuclear division 5 homolog A (S. cerevisiae)		58	86	Rb1cc1	RB1-inducible coiled-coil 1		11	97	Nucks1	nuclear casein kinase and cyclin-dependent kinase substrate 1		29	93	Zdhhc3	zinc finger, DHHC-type containing 3		70	84	Flrt2	fibronectin leucine rich transmembrane protein 2		88	91	C2	complement component 2		58	86	Rb1cc1	RB1-inducible coiled-coil 1		87	90	RGD1310495	similar to KIAA1919 protein
19	93	Tdg	thymine-DNA glycosylase		59	85	Edem3	ER degradation enhancer, mannosidase alpha-like 3		12	97	Prpf4b	pre-mRNA processing factor 4B		30	93	Rngtt	RNA guanylyltransferase and 5'-phosphatase		71	84	Slc4a4	solute carrier family 4, sodium bicarbonate cotransporter, member 4		89	91	Flrt2	fibronectin leucine rich transmembrane protein 2		59	85	Edem3	ER degradation enhancer, mannosidase alpha-like 3		88	90	Pabpc4l	poly(A) binding protein, cytoplasmic 4-like
20	93	Sertad2	SERTA domain containing 2		60	85	LOC100909825	probable isocitrate dehydrogenase [NAD] gamma 2, mitochondrial-like		13	96	Suclg2	succinate-CoA ligase, GDP-forming, beta subunit		31	93	Kcnh7	potassium voltage-gated channel, subfamily H (eag-related), member 7		72	84	Kctd8	potassium channel tetramerization domain containing 8		90	91	Slit2	slit homolog 2 (Drosophila)		60	85	LOC100909825	probable isocitrate dehydrogenase [NAD] gamma 2, mitochondrial-like		89	90	Stard7	StAR-related lipid transfer (START) domain containing 7
21	92	Grid2	glutamate receptor, ionotropic, delta 2		61	85	Lrrc55	leucine rich repeat containing 55		14	96	Mtdh	metadherin		32	92	Vamp4	vesicle-associated membrane protein 4		73	84	Eea1	early endosome antigen 1		91	91	Syt4	synaptotagmin IV		61	85	Lrrc55	leucine rich repeat containing 55		90	90	Luzp1	leucine zipper protein 1
22	92	Scara5	scavenger receptor class A, member 5 (putative)		62	85	Enc1	ectodermal-neural cortex 1		15	96	Nfatc3	nuclear factor of activated T-cells, cytoplasmic, calcineurin-dependent 3		33	92	Epha7	Eph receptor A7		74	84	Rbbp6	retinoblastoma binding protein 6		92	91	Sbno1	strawberry notch homolog 1 (Drosophila)		62	85	Enc1	ectodermal-neural cortex 1		91	90	Rap1a	RAP1A, member of RAS oncogene family
23	92	Thumpd3	THUMP domain containing 3		63	85	Fam84b	family with sequence similarity 84, member B		16	95	Dpysl2	dihydropyrimidinase-like 2		34	92	Vgll4	vestigial like 4 (Drosophila)		75	84	Gls	glutaminase		93	91	Spin4	spindlin family, member 4		63	85	Fam84b	family with sequence similarity 84, member B		92	90	Slc39a10	solute carrier family 39 (zinc transporter), member 10
24	91	LOC100361535	hypothetical LOC100361535		64	85	Cdan1	codanin 1		17	95	Kbtbd8	kelch repeat and BTB (POZ) domain containing 8		35	92	Sirt7	sirtuin 7		76	84	Ccdc127	coiled-coil domain containing 127		94	91	C1galt1	core 1 synthase, glycoprotein-N-acetylgalactosamine 3-beta-galactosyltransferase, 1		64	85	Cdan1	codanin 1		93	90	Kat2a	K(lysine) acetyltransferase 2A
25	91	Trps1	trichorhinophalangeal syndrome I		65	84	Dusp18	dual specificity phosphatase 18		18	95	Ide	insulin degrading enzyme		36	91	Kctd6	potassium channel tetramerization domain containing 6		77	84	Dnajc6	DnaJ (Hsp40) homolog, subfamily C, member 6		95	91	Synj2bp	synaptojanin 2 binding protein		65	84	Dusp18	dual specificity phosphatase 18		94	90	Wnt2	wingless-type MMTV integration site family member 2
26	91	Fgd5	FYVE, RhoGEF and PH domain containing 5		66	84	Ca1	carbonic anhydrase I		19	95	RGD1309079	similar to Ab2-095		37	91	LOC100909688	zinc finger protein 43-like		78	83	Zbtb1	zinc finger and BTB domain containing 1		96	91	Timm23	translocase of inner mitochondrial membrane 23 homolog (yeast)		66	84	Ca1	carbonic anhydrase I		95	90	Otud7a	OTU domain containing 7A
27	90	Ippk	inositol 1,3,4,5,6-pentakisphosphate 2-kinase		67	84	Mtmr3	myotubularin related protein 3		20	95	Gpcpd1	glycerophosphocholine phosphodiesterase GDE1 homolog (S. cerevisiae)		38	91	Capn6	calpain 6		79	83	Chuk	conserved helix-loop-helix ubiquitous kinase		97	91	Shroom2	shroom family member 2		67	84	Mtmr3	myotubularin related protein 3		96	89	Ell2	elongation factor RNA polymerase II 2
28	90	Cpsf7	cleavage and polyadenylation specific factor 7		68	84	LOC102551035	serine/arginine repetitive matrix protein 4-like		21	95	Ier5	immediate early response 5		39	91	Brinp3	bone morphogenetic protein/retinoic acid inducible neural-specific 3		80	83	Rnf138	ring finger protein 138, E3 ubiquitin protein ligase		98	90	LOC306766	hypothetical LOC306766		68	84	LOC102551035	serine/arginine repetitive matrix protein 4-like		97	89	Arf2	ADP-ribosylation factor 2
29	90	Kcnk10	potassium channel, subfamily K, member 10		69	84	Ago1	argonaute RISC catalytic component 1		22	95	Med13	mediator complex subunit 13		40	91	Strn3	striatin, calmodulin binding protein 3		81	83	Pp2d1	protein phosphatase 2C-like domain containing 1		99	90	Toe1	target of EGR1, member 1 (nuclear)		69	84	Ago1	argonaute RISC catalytic component 1		98	89	Bnc2	basonuclin 2
30	90	2017-09-07	septin 7		70	84	Mmgt1	membrane magnesium transporter 1		23	94	Pura	purine rich element binding protein A		41	90	Golga3	golgin A3		82	83	Arfip1	ADP-ribosylation factor interacting protein 1		100	90	LOC100362814	hypothetical protein LOC100362814		70	84	Mmgt1	membrane magnesium transporter 1		99	89	Wasl	Wiskott-Aldrich syndrome-like
31	89	Pik3cb	phosphatidylinositol-4,5-bisphosphate 3-kinase, catalytic subunit beta		71	84	Rassf4	Ras association (RalGDS/AF-6) domain family member 4		24	94	Lats1	large tumor suppressor kinase 1		42	90	Ube2d2	ubiquitin-conjugating enzyme E2D 2		83	83	Ptpn4	protein tyrosine phosphatase, non-receptor type 4		101	90	Zdhhc21	zinc finger, DHHC-type containing 21		71	84	Rassf4	Ras association (RalGDS/AF-6) domain family member 4		100	89	Mier1	mesoderm induction early response 1, transcriptional regulator
32	89	Esm1	endothelial cell-specific molecule 1		72	83	Arhgap42	Rho GTPase activating protein 42		25	93	Timm44	translocase of inner mitochondrial membrane 44 homolog (yeast)		43	90	Pum2	pumilio RNA-binding family member 2		84	82	Carf	calcium responsive transcription factor		102	90	Plekhf2	pleckstrin homology domain containing, family F (with FYVE domain) member 2		72	83	Arhgap42	Rho GTPase activating protein 42		101	89	Brcc3	BRCA1/BRCA2-containing complex, subunit 3
33	89	Bmp2	bone morphogenetic protein 2		73	83	Tc2n	tandem C2 domains, nuclear		26	93	Ezh1	enhancer of zeste homolog 1 (Drosophila)		44	89	Ugt2b1	UDP glucuronosyltransferase 2 family, polypeptide B1		85	82	Nr2f1	nuclear receptor subfamily 2, group F, member 1		103	90	Mccc2	methylcrotonoyl-CoA carboxylase 2 (beta)		73	83	Tc2n	tandem C2 domains, nuclear		102	88	Phf20	PHD finger protein 20
34	88	Galnt3	UDP-N-acetyl-alpha-D-galactosamine:polypeptide N-acetylgalactosaminyltransferase 3 (GalNAc-T3)		74	83	RGD1565058	similar to RIKEN cDNA 1700019M22		27	93	Gabrg2	gamma-aminobutyric acid (GABA) A receptor, gamma 2		45	89	Zfp148	zinc finger protein 148		86	82	Calu	calumenin		104	90	RGD1563296	similar to component of oligomeric golgi complex 5 isoform 1		74	83	RGD1565058	similar to RIKEN cDNA 1700019M22		103	88	Elavl2	ELAV like neuron-specific RNA binding protein 2
35	88	Gria2	glutamate receptor, ionotropic, AMPA 2		75	83	Cbfa2t2	core-binding factor, runt domain, alpha subunit 2; translocated to, 2		28	93	Cpeb4	cytoplasmic polyadenylation element binding protein 4		46	89	Ubxn2b	UBX domain protein 2B		87	82	Fst	follistatin		105	90	Fam131a	family with sequence similarity 131, member A		75	83	Cbfa2t2	core-binding factor, runt domain, alpha subunit 2; translocated to, 2		104	88	Brdt	bromodomain, testis-specific
36	88	Csn2	casein beta		76	83	Hsd11b2	hydroxysteroid 11-beta dehydrogenase 2		29	93	Zdhhc3	zinc finger, DHHC-type containing 3		47	88	Thbs2	thrombospondin 2		88	82	Plekhb1	pleckstrin homology domain containing, family B (evectins) member 1		106	90	Desi2	desumoylating isopeptidase 2		76	83	Hsd11b2	hydroxysteroid 11-beta dehydrogenase 2		105	88	Prdm1	PR domain containing 1, with ZNF domain
37	88	Rala	v-ral simian leukemia viral oncogene homolog A (ras related)		77	83	Robo2	roundabout, axon guidance receptor, homolog 2 (Drosophila)		30	93	Rngtt	RNA guanylyltransferase and 5'-phosphatase		48	88	Ppapdc1b	phosphatidic acid phosphatase type 2 domain containing 1B		89	81	Mtus1	microtubule associated tumor suppressor 1		107	90	Usp31	ubiquitin specific peptidase 31		77	83	Robo2	roundabout, axon guidance receptor, homolog 2 (Drosophila)		106	88	Atp1b4	ATPase, (Na+)/K+ transporting, beta 4 polypeptide
38	88	Supt20	suppressor of Ty 20		78	83	Ncoa7	nuclear receptor coactivator 7		31	93	Kcnh7	potassium voltage-gated channel, subfamily H (eag-related), member 7		49	88	Ptpn4	protein tyrosine phosphatase, non-receptor type 4		90	81	Zfp248	zinc finger protein 248		108	89	Phc3	polyhomeotic homolog 3 (Drosophila)		78	83	Ncoa7	nuclear receptor coactivator 7		107	88	Tle4	transducin-like enhancer of split 4 (E(sp1) homolog, Drosophila)
39	87	Aldh3b2	aldehyde dehydrogenase 3 family, member B2		79	83	LOC102546630	protein gar2-like		32	92	Vamp4	vesicle-associated membrane protein 4		50	88	Kmt2e	lysine (K)-specific methyltransferase 2E		91	81	Stx7	syntaxin 7		109	89	Elf2	E74-like factor 2		79	83	LOC102546630	protein gar2-like		108	88	Agtpbp1	ATP/GTP binding protein 1
40	87	LOC688778	similar to fatty aldehyde dehydrogenase-like		80	83	LOC102557159	protein gar2-like		33	92	Epha7	Eph receptor A7		51	88	Ccnj	cyclin J		92	80	Mtfr1	mitochondrial fission regulator 1		110	89	Nek1	NIMA-related kinase 1		80	83	LOC102557159	protein gar2-like		109	88	Cyp3a2	cytochrome P450, family 3, subfamily a, polypeptide 2
41	87	Sp3	Sp3 transcription factor		81	82	Slc26a6	solute carrier family 26 (anion exchanger), member 6		34	92	Vgll4	vestigial like 4 (Drosophila)		52	87	Prepl	prolyl endopeptidase-like		93	80	Ptplad2	protein tyrosine phosphatase-like A domain containing 2		111	89	Lsamp	limbic system-associated membrane protein		81	82	Slc26a6	solute carrier family 26 (anion exchanger), member 6		110	88	Rab27a	RAB27A, member RAS oncogene family
42	87	Orc1	origin recognition complex, subunit 1		82	82	Rhoa	ras homolog family member A		35	92	Sirt7	sirtuin 7		53	87	Slc2a13	solute carrier family 2 (facilitated glucose transporter), member 13		94	80	Rock1	Rho-associated coiled-coil containing protein kinase 1		112	89	Hnrnpa3	heterogeneous nuclear ribonucleoprotein A3		82	82	Rhoa	ras homolog family member A		111	87	LOC102552988	uncharacterized LOC102552988
43	87	Ppp6c	protein phosphatase 6, catalytic subunit		83	82	Arl13b	ADP-ribosylation factor-like 13B		36	91	Kctd6	potassium channel tetramerization domain containing 6		54	87	St7l	suppression of tumorigenicity 7-like		95	80	Hmgxb4	HMG box domain containing 4		113	89	Sim1	single-minded family bHLH transcription factor 1		83	82	Arl13b	ADP-ribosylation factor-like 13B		112	87	Tbc1d1	TBC1 (tre-2/USP6, BUB2, cdc16) domain family, member 1
[truncated: 2,462 more rows]
[truncated: 8 more columns]

## Sheet: snRF
CER_Ct_M					CER_SR_M					FC_Ct_M					FC_SR_M					HIP_Ct_M					HIP_SR_M					CER_Ct_F					CER_SR_F					FC_Ct_F					Fc_SR_F
[truncated: 261 more rows]
[truncated: 8 more columns]

## Sheet: rRF
CER_Ct_M					CER_SR_M					FC_Ct_M					FC_SR_M					HIP_Ct_M					HIP_SR_M					CER_SR_F					FC_Ct_F					Fc_SR_F					HIP_Ct_F
[truncated: 294 more rows]
[truncated: 4 more columns]

## Sheet: snoRF_seq
	CER_Ct_M	CER_SR_M	FC_Ct_M	FC_SR_M	HIP_Ct_M	HIP_SR_M	CER_Ct_F	CER_SR_F	FC_Ct_F	Fc_SR_F	HIP_Ct_F	HIP_SR_F
[truncated: 53 more rows]

[truncated: 2 more sheets: snRF_seq, rRF_Seq]
