# Supplementary material for: Scatter Irradiation of Rat Brain Triggers Sex- and Brain Region-Specific Changes in the Expression of Non-Coding RNA Fragments
Source: Epigenomes. 2022 Oct 12;6(4):35. doi: 10.3390/epigenomes6040035 (PMC9624364; doi:10.3390/epigenomes6040035)
Supplement: Supplementary file 1 [file epigenomes-06-00035-s001.zip › Supplementary File 2_miRDB targets.xlsx]

## Sheet: tRF_FC_F
A B ..set..
1 TRUE TRUE AnB
2 FALSE TRUE (B)\\(A)
3 TRUE FALSE (A)\\(B)
..values..
1 Gdap2, Wdr44, Yes1, Rab21, Tmed7, Ppp1r14c, Car12, Arpp21, Sec14l2, Yipf6, Fam117b, Oser1, Ywhae, Kcnk10, Macf1, Glrb, Agpat5, Esyt2, Vgll3, Lypla1, Eva1b, Phf12, Sema3d, Slc18a2, Pfkfb3, Grm8, Lrrtm2, Icos, Lypd6b, Tet1, Cped1, Ptprf, Cx3cl1, Clic5, RGD1563510, Slc2a13, Ube2d3, Mbd2, Ash1l, Bicd1, Grin2a, Impad1, Mapk1ip1l, Ralyl, P2ry10, Ipo7, Prox1, Arid4b, Plekha3, Dscaml1, RGD1563325, Ppp3…
2 RGD1559714, Mmp16, Rap1b, Per1, Tmem167a, Mbnl2, Ablim1, Tex10, Sel1l, Mybl1, Shroom2, Ubap2, Abhd13, Ndfip2, Kdm1b, Lrrc2, LOC100910007, Lrrc7, Lpar1, Hykk, Macrod2, Zfp26, LOC100910996, Ube2q2, Six4, Ndnf, Hlcs, LOC102551340, Tanc2, Vav3, Dhx40, Fpgt, Lrpap1, Snx3, Ppp3ca, LOC100362814, Fam219a, Smtnl2, Grid2, Stac, Cdc42, Cideb, Egfl6, LOC102553407, Pds5a, Npas2, Cd163, Rnf44, Heca, Tnks1bp1…
3
..count..
1 340
2 273
3 0

## Sheet: tRF_FC_M
A B ..set..
1 TRUE TRUE AnB
2 FALSE TRUE (B)\\(A)
3 TRUE FALSE (A)\\(B)
..values..
1 Gdap2, Wdr44, Yes1, Rab21, Tmed7, Ppp1r14c, Car12, Arpp21, Sec14l2, Yipf6, Fam117b, Oser1, Ywhae, Kcnk10, Macf1, Glrb, Agpat5, Esyt2, Vgll3, Lypla1, Eva1b, Phf12, Sema3d, Slc18a2, Pfkfb3, Grm8, Lrrtm2, Icos, Lypd6b, Tet1, Cped1, Ptprf, Cx3cl1, Clic5, RGD1563510, Slc2a13, Ube2d3, Mbd2, Ash1l, Bicd1, Grin2a, Impad1, Mapk1ip1l, Ralyl, P2ry10, Ipo7, Prox1, Arid4b, Plekha3, Dscaml1, RGD1563325, Ppp3…
2 Pum1, Stat3, Gtf2ird1, Trim2, Gabra1, LOC688452, Tmem41b, Zc3h6, Rbfox1, Nphp4, Glrx2, LOC100125362, Kank4, Mitf, Hecw1, Sptbn4, Aph1a, Cadps, Ldoc1l, Tor4a, Relt, Pla2g3, Cers6, Tmem86a, Fbxo11, Orai2, Simc1, Myo1e, Xrcc4, Idh3B, Kmt2a, Blzf1, Tor1b, Reln, Colec10, Atp10d, Mdm4, Nmrk1, Kcnma1, Mars2, Zfp580, Hus1, Dffa, Stk40, LOC100361946, Prr18, Rnf215, RGD1562865, Tcf20, LOC100910478, Mknk1…
3
..count..
1 926
2 58
3 0

## Sheet: tRF_HIP_F
A B ..set..
1 TRUE TRUE AnB
2 FALSE TRUE (B)\\(A)
3 TRUE FALSE (A)\\(B)
..values..
1 Gdap2, Wdr44, Yes1, Rab21, Tmed7, Ppp1r14c, Car12, Arpp21, Sec14l2, Yipf6, Fam117b, Oser1, Ywhae, Kcnk10, Macf1, Glrb, Agpat5, Esyt2, Vgll3, Lypla1, Eva1b, Phf12, Sema3d, Slc18a2, Pfkfb3, Grm8, Lrrtm2, Icos, Lypd6b, Tet1, Cped1, Ptprf, Cx3cl1, Clic5, RGD1563510, Slc2a13, Ube2d3, Mbd2, Ash1l, Bicd1, Grin2a, Impad1, Mapk1ip1l, Ralyl, P2ry10, Ipo7, Prox1, Arid4b, Plekha3, Dscaml1, RGD1563325, Ppp3…
2
3 Kcmf1, Adamts9, Trim8, Cnn3, Cited2, Adam10, Ppp1r9a, Msl2, Jph1, Fbxw7, Arsk, E2f5, Sybu, Spry4, Abhd13, Rspry1, Cnep1r1, Zfp422, Rwdd4, Satb1, Raver2, Mrps34, RGD1561931, Ythdf2, Smo, Whsc1, Usp7, Lhx8, Ltbp1, Pcdh19, Ctnna2, Nr2f2, Etnk1, Pcdhac2, Map7d2, Gpm6a, Pgk1, Cnnm2, Fat4, Ptges3, Srsf2, Peli1, Schip1, Dimt1, Tm9sf3, Odf2l, Seli, Fam160b1, Ahi1, Mycn, Hcfc1, Lrrtm3, Brf1, Maea, Lrif1…
..count..
1 456
2 0
3 705

## Sheet: tRF_HIP_M
A B ..set..
1 TRUE TRUE AnB
2 FALSE TRUE (B)\\(A)
3 TRUE FALSE (A)\\(B)
..values..
1 Gdap2, Wdr44, Yes1, Rab21, Tmed7, Ppp1r14c, Car12, Arpp21, Sec14l2, Yipf6, Fam117b, Oser1, Ywhae, Kcnk10, Macf1, Glrb, Agpat5, Esyt2, Vgll3, Lypla1, Eva1b, Phf12, Sema3d, Slc18a2, Pfkfb3, Grm8, Lrrtm2, Icos, Lypd6b, Tet1, Cped1, Ptprf, Cx3cl1, Clic5, RGD1563510, Slc2a13, Ube2d3, Mbd2, Ash1l, Mtf1, Uhrf2, Nudt12, Nlk, Krt10, Cd48, Hecw2, Gdnf, Atp2b1, Usp32, Kcna4, Arhgap12, Otud4, Cpeb4, Amd1, …
2 Stac, Lpin2, Esco1, Nr6a1, Zfp53
3 Lhx8, Ltbp1, Pcdh19, Ctnna2, Nr2f2, Etnk1, Pcdhac2, Map7d2, Gpm6a, Pgk1, Cnnm2, Fat4, Ptges3, Srsf2, Peli1, Schip1, Dimt1, Tm9sf3, Odf2l, Seli, Fam160b1, Ahi1, Mycn, Hcfc1, Lrrtm3, Brf1, Maea, Lrif1, Tmem196, Ube2g1, RGD1309079, Cisd2
..count..
1 456
2 5
3 32

## Sheet: tRF_CER_F
A B ..set..
1 TRUE TRUE AnB
2 FALSE TRUE (B)\\(A)
3 TRUE FALSE (A)\\(B)
..values..
1 Gdap2, Wdr44, Yes1, Rab21, Tmed7, Ppp1r14c, Car12, Arpp21, Sec14l2, Yipf6, Fam117b, Oser1, Ywhae, Kcnk10, Macf1, Glrb, Agpat5, Esyt2, Vgll3, Lypla1, Eva1b, Phf12, Sema3d, Slc18a2, Pfkfb3, Grm8, Lrrtm2, Icos, Lypd6b, Tet1, Cped1, Ptprf, Cx3cl1, Clic5, RGD1563510, Slc2a13, Ube2d3, Mbd2, Ash1l, Bicd1, Grin2a, Impad1, Mapk1ip1l, Ralyl, P2ry10, Ipo7, Prox1, Arid4b, Plekha3, Dscaml1, RGD1563325, Ppp3…
2 42795, Ankrd44, Mctp2, Ccser2, Ovol1, Abcg4, Tenm4, Boll, Purb, Ccny, Lrrc8c, Jam3, Knstrn, Lrp12, Hs6st2, Ubqln2, Irgq, Tspan11, Rfx2, Pgf, Dll4, Gjd2, Narg2, Hao1, Slfn5, Tmx4, Rbms3, Cpox, 42801, Mavs, Phf20, Dpagt1, Serinc5, Zcchc16, Ppp1r11, Esrrb, Rps6ka3, Tmem221, 42983
3 1-Mar, 5-Sep
..count..
1 484
2 39
3 2

## Sheet: tRF_CER_M
A B ..set..
1 TRUE TRUE AnB
2 FALSE TRUE (B)\\(A)
3 TRUE FALSE (A)\\(B)
..values..
1 Gdap2, Wdr44, Yes1, Rab21, Tmed7, Ppp1r14c, Car12, Arpp21, Sec14l2, Yipf6, Fam117b, Oser1, Ywhae, Kcnk10, Macf1, Glrb, Agpat5, Esyt2, Vgll3, Lypla1, Eva1b, Phf12, Sema3d, Slc18a2, Pfkfb3, Grm8, Lrrtm2, Icos, Lypd6b, Tet1, Cped1, Ptprf, Cx3cl1, Clic5, RGD1563510, Slc2a13, Ube2d3, Mbd2, Ash1l, Bicd1, Grin2a, Impad1, Mapk1ip1l, Ralyl, P2ry10, Ipo7, Prox1, Arid4b, Plekha3, Dscaml1, RGD1563325, Ppp3…
2 42795, Plagl1, Tmem35, Strn3, Plcl1, Phf20l1, Phc1, Adra1a, Cpsf6, Slc44a1, Rtcd1, Jak2, 42983, LOC100912943, Lancl2, Tsga10ip, Impa1, Mtdh, Cldn16, Tmem59l, Entpd5, Ndrg2, Col6a5, Taf2, Mmp14, N4bp2l2, Prkaa1, Sfmbt1, Alox12, Abl2, Pigy, Slc16a12, Ube4a, Foxp3, Brcc3, LOC102551231, Mapk8, Ssu72, Sipa1l2, Socs6, Olfml3, Fam161a, Plaur, Daglb, Fkbp8, Wdr96, Rasgrp1, Tfap2b, Nup62cl, Pccb, Fam8a1…
3 RGD1559714, Mmp16, Rap1b, Slc16a1, Per1, Tmem167a, Mbnl2, Ablim1, Tex10, Sel1l, Mybl1, Shroom2, Ubap2, Abhd13, Ndfip2, Kdm1b, Lrrc2, LOC100910007, Lrrc7, Lpar1, Hykk, Macrod2, Zfp26, LOC100910996, Ube2q2, Six4, Ndnf, Hlcs, LOC102551340, Tanc2, Vav3, Dhx40, Fpgt, Lrpap1, Snx3, Ppp3ca, LOC100362814, Fam219a, Smtnl2, Grid2, Stac, Cdc42, Cideb, Egfl6, LOC102553407, Pds5a, Npas2, Cd163, Rnf44, Heca,…
..count..
1 341
2 86
3 392

## Sheet: rRF_FC_F
A B ..set..
1 TRUE TRUE AnB
2 FALSE TRUE (B)\\(A)
3 TRUE FALSE (A)\\(B)
..values..
1 Zbtb44, Appbp2, Ripply3, Pex12, Tet1, Cpeb4, Fgf7, Rhobtb3, Rag1, Arhgap5, Mtss1, Nr2c1, Nog, Med14, Gria2, LOC100909787, Clock, Camta1, Mex3c, Zfpm2, Mapre1, Arrdc3, Fgd6, Zfp637, Slc35b3, Btbd10, Zfp804a, Ddhd2, Slc26a7, Apc, Bend4, Atp6v1b2, Nova1, Adam12, Ptpn4, Cwc25, Vamp7, Adra1d, LOC683071, Rassf8, Mid2, Usp47, Herc4, Ubn2, Selt, Pnn, Slc16a12, Armc1, Ccdc6, Spry4, Ccdc126, Brwd3, Snx10…
2
3
..count..
1 66
2 0
3 0

## Sheet: rRF_FC_M
A B ..set..
1 TRUE TRUE AnB
2 FALSE TRUE (B)\\(A)
3 TRUE FALSE (A)\\(B)
..values..
1 Zbtb44, Appbp2, Ripply3, Pex12, Tet1, Cpeb4, Fgf7, Rhobtb3, Rag1, Arhgap5, Mtss1, Nr2c1, Nog, Med14, Gria2, LOC100909787, Clock, Camta1, Mex3c, Zfpm2, Mapre1, Arrdc3, Fgd6, Zfp637, Slc35b3, Btbd10, Zfp804a, Ddhd2, Slc26a7, Apc, Bend4, Atp6v1b2, Nova1, Adam12, Ptpn4, Cwc25, Vamp7, Adra1d, LOC683071, Rassf8, Mid2, Usp47, Herc4, Ubn2, Selt, Pnn, Slc16a12, Armc1, Ccdc6, Spry4, Ccdc126, Brwd3, Snx10…
2 Gspt1, Adamts6, Srgap3, Prdm12, Srsf2, Otof, Wwc2, Ppard, Kcnq4, LOC100911378, Tnfrsf26, Fam19a3, Hapln4, Ank2, Cyp4f18, Btrc, Nhej1, LOC102549836, Plekhd1, RGD1309049, LOC102549615, Extl3, Pou3f1, Fam160b2, Tbc1d2, Hspa12a, LOC100909834, Kdm4d, Capn11
3
..count..
1 66
2 29
3 0

## Sheet: rRF_HIP_F
A B ..set..
1 TRUE TRUE AnB
2 FALSE TRUE (B)\\(A)
3 TRUE FALSE (A)\\(B)
..values..
1 Srgap3, Prdm12, Srsf2, Otof, Wwc2, Ppard, Kcnq4, LOC100911378, Tnfrsf26, Fam19a3, Hapln4, Ank2, Cyp4f18, Btrc, Nhej1, LOC102549836, Plekhd1, RGD1309049, LOC102549615, Extl3, Pou3f1, Fam160b2, Tbc1d2, Hspa12a, LOC100909834, Kdm4d, Adamts6, Capn11
2
3 Zbtb44, Appbp2, Ripply3, Pex12, Tet1, Cpeb4, Fgf7, Rhobtb3, Rag1, Arhgap5, Mtss1, Nr2c1, Nog, Med14, Gria2, LOC100909787, Clock, Camta1, Mex3c, Zfpm2, Mapre1, Arrdc3, Fgd6, Zfp637, Slc35b3, Btbd10, Zfp804a, Ddhd2, Slc26a7, Apc, Bend4, Atp6v1b2, Nova1, Adam12, Ptpn4, Cwc25, Vamp7, Adra1d, LOC683071, Rassf8, Mid2, Usp47, Herc4, Ubn2, Selt, Pnn, Slc16a12, Armc1, Ccdc6, Spry4, Ccdc126, Brwd3, Snx10…
..count..
1 28
2 0
3 67

## Sheet: rRF_HIP_M
A B ..set..
1 TRUE TRUE AnB
2 FALSE TRUE (B)\\(A)
3 TRUE FALSE (A)\\(B)
..values..
1 Zbtb44, Appbp2, Ripply3, Pex12, Tet1, Cpeb4, Fgf7, Rhobtb3, Rag1, Arhgap5, Mtss1, Nr2c1, Nog, Med14, Gria2, LOC100909787, Clock, Camta1, Mex3c, Zfpm2, Mapre1, Arrdc3, Fgd6, Zfp637, Slc35b3, Btbd10, Zfp804a, Ddhd2, Slc26a7, Apc, Bend4, Atp6v1b2, Nova1, Adam12, Ptpn4, Cwc25, Vamp7, Adra1d, LOC683071, Rassf8, Mid2, Usp47, Herc4, Ubn2, Selt, Pnn, Slc16a12, Armc1, Ccdc6, Spry4, Ccdc126, Brwd3, Snx10…
2
3 Srgap3, Prdm12, Srsf2, Otof, Wwc2, Ppard, Kcnq4, LOC100911378, Tnfrsf26, Fam19a3, Hapln4, Ank2, Cyp4f18, Btrc, Nhej1, LOC102549836, Plekhd1, RGD1309049, LOC102549615, Extl3, Pou3f1, Fam160b2, Tbc1d2, Hspa12a, LOC100909834, Kdm4d, Adamts6, Capn11
..count..
1 66
2 0
3 28

[truncated: 13 more sheets: rRF_CER_M, snoRF_FC_F, snoRF_FC_M, snoRF_HIP_F, snoRF_HIP_M, snoRF_CER_F, snoRF_CER_M, snRF_FC_F, snRF_FC_M, snRF_HIP_F, snRF_HIP_M, snRF_CER_F, snRF_CER_M]
