# Supplementary material for: Scatter Irradiation of Rat Brain Triggers Sex- and Brain Region-Specific Changes in the Expression of Non-Coding RNA Fragments
Source: Epigenomes. 2022 Oct 12;6(4):35. doi: 10.3390/epigenomes6040035 (PMC9624364; doi:10.3390/epigenomes6040035)
Supplement: Supplementary file 1 [file epigenomes-06-00035-s001.zip › Supplementary File 3_David targets.xlsx]

## Sheet: tRF_FC_F
A B ..set..
1 TRUE TRUE AnB
2 FALSE TRUE (B)\\(A)
3 TRUE FALSE (A)\\(B)
..values..
1 GO:0005794~Golgi apparatus, rno04724:Glutamatergic synapse, rno04024:cAMP signaling pathway, Glycoprotein, GO:0005887~integral component of plasma membrane, Phosphoprotein, GO:0042734~presynaptic membrane, Synapse, Cell junction, GO:0045202~synapse, GO:0014069~postsynaptic density, Golgi apparatus, GO:0005654~nucleoplasm, GO:0016020~membrane, rno05222:Small cell lung cancer, rno04728:Dopaminerg…
2 GO:0010628~positive regulation of gene expression, GO:0010942~positive regulation of cell death, Zinc, GO:0006355~regulation of transcription, DNA-templated, GO:0014066~regulation of phosphatidylinositol 3-kinase signaling, rno04510:Focal adhesion, GO:0070936~protein K48-linked ubiquitination, Zinc-finger, GO:0042752~regulation of circadian rhythm, GO:0016567~protein ubiquitination, rno04670:Le…
3 Potassium channel, rno04080:Neuroactive ligand-receptor interaction, Ion channel, rno04923:Regulation of lipolysis in adipocytes, GO:0001078~transcriptional repressor activity, RNA polymerase II core promoter proximal region sequence-specific binding, GO:0044325~ion channel binding, GPI-anchor, rno00562:Inositol phosphate metabolism, rno05220:Chronic myeloid leukemia, GO:0000790~nuclear chromat…
..count..
1 188
2 214
3 62

## Sheet: tRF_FC_M
A B ..set..
1 TRUE TRUE AnB
2 FALSE TRUE (B)\\(A)
3 TRUE FALSE (A)\\(B)
..values..
1 Phosphoprotein, GO:0005634~nucleus, GO:0005654~nucleoplasm, GO:0005794~Golgi apparatus, GO:0005737~cytoplasm, Zinc, GO:0008270~zinc ion binding, GO:0045944~positive regulation of transcription from RNA polymerase II promoter, GO:0005515~protein binding, GO:0003700~transcription factor activity, sequence-specific DNA binding, GO:0000978~RNA polymerase II core promoter proximal region sequence-sp…
2 GO:2000615~regulation of histone H3-K9 acetylation, GO:0007399~nervous system development, GO:0005912~adherens junction, GO:0001675~acrosome assembly, IPR011598:Myc-type, basic helix-loop-helix (bHLH) domain, GO:0003705~transcription factor activity, RNA polymerase II distal enhancer sequence-specific binding, SM00033:CH, GO:0043001~Golgi to plasma membrane protein transport, GO:0042789~mRNA tr…
3 rno04310:Wnt signaling pathway, rno04320:Dorso-ventral axis formation, rno04974:Protein digestion and absorption, rno05223:Non-small cell lung cancer, Cell division, Isopeptide bond, Endosome, DNA repair, GO:0045177~apical part of cell, GO:0031225~anchored component of membrane, GO:0005921~gap junction, GO:0004871~signal transducer activity, GO:0004725~protein tyrosine phosphatase activity, GO:…
..count..
1 620
2 64
3 40

## Sheet: tRF_HIP_F
A B ..set..
1 TRUE TRUE AnB
2 FALSE TRUE (B)\\(A)
3 TRUE FALSE (A)\\(B)
..values..
1 GO:0005737~cytoplasm, Phosphoprotein, Zinc, rno05200:Pathways in cancer, GO:0008270~zinc ion binding, GO:0005794~Golgi apparatus, GO:0005654~nucleoplasm, GO:0005634~nucleus, GO:0043197~dendritic spine, Zinc-finger, GO:0045944~positive regulation of transcription from RNA polymerase II promoter, GO:0000122~negative regulation of transcription from RNA polymerase II promoter, GO:0046332~SMAD bind…
2 GO:0001964~startle response, IPR018980:FERM, C-terminal PH-like domain, IPR018979:FERM, N-terminal, GO:0043425~bHLH transcription factor binding, domain:CRAL-TRIO, GO:0000982~transcription factor activity, RNA polymerase II core promoter proximal region sequence-specific binding, GO:0032591~dendritic spine membrane, Synaptosome, SM01196:SM01196, GO:0048511~rhythmic process, IPR004827:Basic-leuc…
3 rno05206:MicroRNAs in cancer, rno04014:Ras signaling pathway, rno04010:MAPK signaling pathway, rno04722:Neurotrophin signaling pathway, GO:0005913~cell-cell adherens junction, Nucleus, GO:0004713~protein tyrosine kinase activity, GO:0003713~transcription coactivator activity, rno05202:Transcriptional misregulation in cancer, Tyrosine-protein kinase, DNA-binding, GO:0019903~protein phosphatase b…
..count..
1 246
2 74
3 453

## Sheet: tRF_HIP_M
A B ..set..
1 TRUE TRUE AnB
2 FALSE TRUE (B)\\(A)
3 TRUE FALSE (A)\\(B)
..values..
1 Phosphoprotein, GO:0005794~Golgi apparatus, GO:0005654~nucleoplasm, GO:0005634~nucleus, rno04024:cAMP signaling pathway, GO:0005887~integral component of plasma membrane, GO:0008270~zinc ion binding, Cell junction, GO:0005515~protein binding, GO:0005737~cytoplasm, rno04724:Glutamatergic synapse, Glycoprotein, GO:0042734~presynaptic membrane, Coiled coil, GO:0007612~learning, GO:0045944~positive…
2 GO:0006275~regulation of DNA replication, GO:0046872~metal ion binding, GO:0034421~post-translational protein acetylation, rno04080:Neuroactive ligand-receptor interaction, GO:0007268~chemical synaptic transmission, GO:0007626~locomotory behavior, GO:0005102~receptor binding, Ion channel, GO:0019901~protein kinase binding, short sequence motif:PDZ-binding, GO:0005769~early endosome, IPR014352:F…
3 rno04670:Leukocyte transendothelial migration, Fatty acid biosynthesis, Cell adhesion, rno04120:Ubiquitin mediated proteolysis, GO:0043234~protein complex, rno05100:Bacterial invasion of epithelial cells, GO:0045177~apical part of cell, GO:0030027~lamellipodium, GO:0043025~neuronal cell body, GO:0030175~filopodium, GO:0061631~ubiquitin conjugating enzyme activity, GO:0004842~ubiquitin-protein t…
..count..
1 285
2 30
3 38

## Sheet: tRF_CER_F
A B ..set..
1 TRUE TRUE AnB
2 FALSE TRUE (B)\\(A)
3 TRUE FALSE (A)\\(B)
..values..
1 Phosphoprotein, GO:0005794~Golgi apparatus, GO:0005737~cytoplasm, GO:0005634~nucleus, GO:0005654~nucleoplasm, GO:0005887~integral component of plasma membrane, rno05215:Prostate cancer, rno04151:PI3K-Akt signaling pathway, GO:0030335~positive regulation of cell migration, rno04024:cAMP signaling pathway, Glycoprotein, rno05200:Pathways in cancer, Cell junction, GO:0005515~protein binding, GO:00…
2 GO:0032515~negative regulation of phosphoprotein phosphatase activity, IPR004092:Mbt repeat, IPR002999:Tudor domain, IPR001878:Zinc finger, CCHC-type, rno04330:Notch signaling pathway, GO:0001525~angiogenesis, IPR022255:Protein of unknown function DUF3776, IPR013088:Zinc finger, NHR/GATA-type, IPR019786:Zinc finger, PHD-type, conserved site, GO:0001569~patterning of blood vessels, GO:0005923~bi…
3 rno00562:Inositol phosphate metabolism, rno04920:Adipocytokine signaling pathway, rno04917:Prolactin signaling pathway, rno05220:Chronic myeloid leukemia, rno04310:Wnt signaling pathway, Cell projection, Ubl conjugation pathway, Heparin-binding, Tight junction, GTPase activation, GO:0043025~neuronal cell body, GO:0005829~cytosol, GO:0000139~Golgi membrane, GO:0045121~membrane raft, GO:0045211~p…
..count..
1 367
2 34
3 37

## Sheet: tRF_CER_M
A B ..set..
1 TRUE TRUE AnB
2 FALSE TRUE (B)\\(A)
3 TRUE FALSE (A)\\(B)
..values..
1 Phosphoprotein, GO:0005515~protein binding, GO:0000978~RNA polymerase II core promoter proximal region sequence-specific DNA binding, GO:0005634~nucleus, Glycoprotein, GO:0005794~Golgi apparatus, GO:0005737~cytoplasm, GO:0045944~positive regulation of transcription from RNA polymerase II promoter, GO:0005654~nucleoplasm, Zinc, GO:0008270~zinc ion binding, GO:0003700~transcription factor activit…
2 rno04261:Adrenergic signaling in cardiomyocytes, GO:0042383~sarcolemma, IPR000008:C2 calcium-dependent membrane targeting, GO:0019229~regulation of vasoconstriction, GO:0006470~protein dephosphorylation, SM00239:C2, IPR019749:Band 4.1 domain, IPR000299:FERM domain, IPR019748:FERM central domain, GO:0016604~nuclear body, IPR018980:FERM, C-terminal PH-like domain, Fatty acid metabolism, IPR018979…
3 Transcription regulation, Transcription, rno04722:Neurotrophin signaling pathway, rno05206:MicroRNAs in cancer, rno04662:B cell receptor signaling pathway, GO:0005158~insulin receptor binding, rno04520:Adherens junction, rno04917:Prolactin signaling pathway, GO:0000976~transcription regulatory region sequence-specific DNA binding, rno04370:VEGF signaling pathway, rno05202:Transcriptional misreg…
..count..
1 217
2 109
3 346

## Sheet: rRF_FC_F
A B ..set..
1 TRUE TRUE AnB
2 FALSE TRUE (B)\\(A)
3 TRUE FALSE (A)\\(B)
..values..
1 GO:0035371~microtubule plus-end, GO:0034334~adherens junction maintenance, IPR004100:ATPase, alpha/beta subunit, N-terminal, IPR020003:ATPase, alpha/beta subunit, nucleotide-binding domain, active site, IPR000194:ATPase, F1/V1/A1 complex, alpha/beta subunit, nucleotide-binding domain, GO:0019827~stem cell population maintenance, GO:0033180~proton-transporting V-type ATPase, V1 domain, GO:003537…
2
3
..count..
1 32
2 0
3 0

## Sheet: rRF_FC_M
A B ..set..
1 TRUE TRUE AnB
2 FALSE TRUE (B)\\(A)
3 TRUE FALSE (A)\\(B)
..values..
1 GO:0035371~microtubule plus-end, GO:0034334~adherens junction maintenance, IPR004100:ATPase, alpha/beta subunit, N-terminal, IPR020003:ATPase, alpha/beta subunit, nucleotide-binding domain, active site, IPR000194:ATPase, F1/V1/A1 complex, alpha/beta subunit, nucleotide-binding domain, GO:0019827~stem cell population maintenance, GO:0033180~proton-transporting V-type ATPase, V1 domain, GO:003537…
2 Coiled coil, GO:0050680~negative regulation of epithelial cell proliferation, Hearing, Zinc, GO:0001501~skeletal system development, GO:0045598~regulation of fat cell differentiation, GO:0006974~cellular response to DNA damage stimulus, GO:0045892~negative regulation of transcription, DNA-templated, GO:0043005~neuron projection, GO:0001078~transcriptional repressor activity, RNA polymerase II c…
3 IPR013083:Zinc finger, RING/FYVE/PHD-type, Transport, GO:0016020~membrane, GO:0045202~synapse, topological domain:Cytoplasmic, GO:0005654~nucleoplasm, rno04966:Collecting duct acid secretion, GO:0035235~ionotropic glutamate receptor signaling pathway, Protein transport, Microtubule, rno04130:SNARE interactions in vesicular transport, IPR016024:Armadillo-type fold, GO:0005794~Golgi apparatus, GO…
..count..
1 18
2 14
3 14

## Sheet: rRF_HIP_F
A B ..set..
1 TRUE TRUE AnB
2 FALSE TRUE (B)\\(A)
3 TRUE FALSE (A)\\(B)
..values..
1 Coiled coil, Hearing
2 Cytoplasmic vesicle, compositionally biased region:Poly-Lys, GO:0097190~apoptotic signaling pathway, Transcription regulation, Transcription, DNA-binding
3 GO:0035371~microtubule plus-end, GO:0045893~positive regulation of transcription, DNA-templated, GO:0034334~adherens junction maintenance, IPR000194:ATPase, F1/V1/A1 complex, alpha/beta subunit, nucleotide-binding domain, IPR004100:ATPase, alpha/beta subunit, N-terminal, IPR020003:ATPase, alpha/beta subunit, nucleotide-binding domain, active site, GO:0019827~stem cell population maintenance, GO…
..count..
1 2
2 6
3 31

## Sheet: rRF_HIP_M
A B ..set..
1 TRUE TRUE AnB
2 FALSE TRUE (B)\\(A)
3 TRUE FALSE (A)\\(B)
..values..
1 GO:0035371~microtubule plus-end, GO:0045893~positive regulation of transcription, DNA-templated, GO:0034334~adherens junction maintenance, IPR004100:ATPase, alpha/beta subunit, N-terminal, IPR000194:ATPase, F1/V1/A1 complex, alpha/beta subunit, nucleotide-binding domain, IPR020003:ATPase, alpha/beta subunit, nucleotide-binding domain, active site, GO:0019827~stem cell population maintenance, GO…
2 IPR013083:Zinc finger, RING/FYVE/PHD-type, GO:0016020~membrane, GO:0045202~synapse, topological domain:Cytoplasmic, GO:0005654~nucleoplasm, GO:0035235~ionotropic glutamate receptor signaling pathway, Protein transport, Microtubule, rno04130:SNARE interactions in vesicular transport, IPR016024:Armadillo-type fold, GO:0005794~Golgi apparatus, GO:0060412~ventricular septum morphogenesis
3 Coiled coil, GO:0050680~negative regulation of epithelial cell proliferation, Hearing, Zinc, GO:0001501~skeletal system development, GO:0045598~regulation of fat cell differentiation, GO:0045892~negative regulation of transcription, DNA-templated, GO:0006974~cellular response to DNA damage stimulus, GO:0043005~neuron projection, GO:0001078~transcriptional repressor activity, RNA polymerase II c…
..count..
1 20
2 12
3 16

[truncated: 7 more sheets: rRF_CER_M, snoRF_FC_F, snoRF_FC_M, snoRF_HIP_F, snoRF_HIP_M, snoRF_CER_F, snoRF_CER_M]
