# Supplementary material for: Scatter Irradiation of Rat Brain Triggers Sex- and Brain Region-Specific Changes in the Expression of Non-Coding RNA Fragments
Source: Epigenomes. 2022 Oct 12;6(4):35. doi: 10.3390/epigenomes6040035 (PMC9624364; doi:10.3390/epigenomes6040035)
Supplement: Supplementary file 1 [file epigenomes-06-00035-s001.zip › Supplementary File 4_David targets_significant.xlsx]

## Sheet: tRF_FC_F
A B ..set..
1 TRUE TRUE AnB
2 FALSE TRUE (B)\\(A)
3 TRUE FALSE (A)\\(B)
..values..
1 rno04724:Glutamatergic synapse, rno04024:cAMP signaling pathway, Cell junction, GO:0005794~Golgi apparatus, GO:0005887~integral component of plasma membrane, Glycoprotein, Phosphoprotein
2 rno04720:Long-term potentiation, rno04360:Axon guidance, rno04530:Tight junction, GO:0043197~dendritic spine, GO:0043005~neuron projection, rno05200:Pathways in cancer, GO:0045944~positive regulation of transcription from RNA polymerase II promoter, GO:0008270~zinc ion binding, GO:0005515~protein binding, GO:0005654~nucleoplasm, GO:0005634~nucleus, GO:0005737~cytoplasm
3 GO:0042734~presynaptic membrane, Synapse
..count..
1 7
2 12
3 2

## Sheet: tRF_FC_M
A B ..set..
1 TRUE TRUE AnB
2 FALSE TRUE (B)\\(A)
3 TRUE FALSE (A)\\(B)
..values..
1 Notch signaling pathway, GO:0005158~insulin receptor binding, GO:0042752~regulation of circadian rhythm, GO:0046332~SMAD binding, IPR019786:Zinc finger, PHD-type, conserved site, IPR001965:Zinc finger, PHD-type, IPR019787:Zinc finger, PHD-finger, rno04917:Prolactin signaling pathway, rno05212:Pancreatic cancer, rno04720:Long-term potentiation, IPR011011:Zinc finger, FYVE/PHD-type, SM00249:PHD, …
2 GO:0042787~protein ubiquitination involved in ubiquitin-dependent protein catabolic process, GO:0046983~protein dimerization activity, Calmodulin-binding, rno04066:HIF-1 signaling pathway, Lipid-binding, rno04931:Insulin resistance, GO:0008283~cell proliferation, GO:0042127~regulation of cell proliferation, rno05161:Hepatitis B, rno04550:Signaling pathways regulating pluripotency of stem cells,…
3 GO:0000976~transcription regulatory region sequence-specific DNA binding, GO:0030315~T-tubule, rno04370:VEGF signaling pathway, GO:0004713~protein tyrosine kinase activity, rno04520:Adherens junction, rno05222:Small cell lung cancer, rno04012:ErbB signaling pathway, rno05231:Choline metabolism in cancer, rno04724:Glutamatergic synapse, Immunoglobulin domain, GO:0016020~membrane
..count..
1 79
2 19
3 11

## Sheet: tRF_HIP_F
A B ..set..
1 TRUE TRUE AnB
2 FALSE TRUE (B)\\(A)
3 TRUE FALSE (A)\\(B)
..values..
1 rno04024:cAMP signaling pathway, GO:0005794~Golgi apparatus, GO:0005654~nucleoplasm, GO:0005887~integral component of plasma membrane, Phosphoprotein, GO:0005634~nucleus
2
3 GO:0030511~positive regulation of transforming growth factor beta receptor signaling pathway, GO:0042974~retinoic acid receptor binding, Notch signaling pathway, GO:0046332~SMAD binding, GO:0010494~cytoplasmic stress granule, GO:0042752~regulation of circadian rhythm, GO:0030315~T-tubule, GO:0017148~negative regulation of translation, rno04520:Adherens junction, IPR001965:Zinc finger, PHD-type,…
..count..
1 6
2 0
3 98

## Sheet: tRF_HIP_M
A B ..set..
1 TRUE TRUE AnB
2 FALSE TRUE (B)\\(A)
3 TRUE FALSE (A)\\(B)
..values.. ..count..
1 rno04024:cAMP signaling pathway, GO:0005794~Golgi apparatus, GO:0005887~integral component of plasma membrane, GO:0005654~nucleoplasm, Phosphoprotein, GO:0005634~nucleus 6
2 0
3 0

## Sheet: tRF_CER_F
A B ..set..
1 TRUE TRUE AnB
2 FALSE TRUE (B)\\(A)
3 TRUE FALSE (A)\\(B)
..values..
1 rno05215:Prostate cancer, rno04724:Glutamatergic synapse, GO:0030335~positive regulation of cell migration, rno04024:cAMP signaling pathway, rno04151:PI3K-Akt signaling pathway, rno05200:Pathways in cancer, Cell junction, GO:0005794~Golgi apparatus, GO:0045944~positive regulation of transcription from RNA polymerase II promoter, GO:0005887~integral component of plasma membrane, GO:0005515~prote…
2 rno05160:Hepatitis C, GO:0008270~zinc ion binding
3 rno04068:FoxO signaling pathway
..count..
1 17
2 2
3 1

## Sheet: tRF_CER_M
A B ..set..
1 TRUE TRUE AnB
2 FALSE TRUE (B)\\(A)
3 TRUE FALSE (A)\\(B)
..values..
1 GO:0042734~presynaptic membrane, rno04724:Glutamatergic synapse, rno04024:cAMP signaling pathway, GO:0005794~Golgi apparatus, GO:0005887~integral component of plasma membrane, GO:0005654~nucleoplasm, Phosphoprotein
2 GO:0007612~learning, GO:0030335~positive regulation of cell migration, GO:0005634~nucleus
3 GO:0005158~insulin receptor binding, GO:0000976~transcription regulatory region sequence-specific DNA binding, rno05213:Endometrial cancer, rno04370:VEGF signaling pathway, rno05215:Prostate cancer, rno04662:B cell receptor signaling pathway, rno05212:Pancreatic cancer, rno04720:Long-term potentiation, rno04520:Adherens junction, rno05211:Renal cell carcinoma, rno04917:Prolactin signaling pathw…
..count..
1 7
2 3
3 55

## Sheet: snoRF_FC_F
A B ..set.. ..values.. ..count..
1 TRUE TRUE AnB GO:0005654~nucleoplasm, Phosphoprotein, GO:0005634~nucleus 3
2 FALSE TRUE (B)\\(A) GO:0010976~positive regulation of neuron projection development, GO:0030426~growth cone, rno04360:Axon guidance, GO:0005737~cytoplasm 4
3 TRUE FALSE (A)\\(B) GO:0003730~mRNA 3'-UTR binding, Ubl conjugation, GO:0044822~poly(A) RNA binding 3

## Sheet: snoRF_FC_M
A B ..set..
1 TRUE TRUE AnB
2 FALSE TRUE (B)\\(A)
3 TRUE FALSE (A)\\(B)
..values..
1 GO:0035035~histone acetyltransferase binding, rno05031:Amphetamine addiction, rno05211:Renal cell carcinoma, rno04070:Phosphatidylinositol signaling system, Protein phosphatase, rno00562:Inositol phosphate metabolism, GO:0030426~growth cone, rno04360:Axon guidance, rno04919:Thyroid hormone signaling pathway, IPR000210:BTB/POZ-like, IPR011333:BTB/POZ fold, rno04510:Focal adhesion, rno04022:cGMP-…
2 GO:0005845~mRNA cap binding complex, domain:RRM 3, GO:0032839~dendrite cytoplasm, GO:0003730~mRNA 3'-UTR binding, rno00512:Mucin type O-Glycan biosynthesis, rno04960:Aldosterone-regulated sodium reabsorption, rno05030:Cocaine addiction, Kelch repeat, Sodium transport, GO:0016605~PML body, Sodium, GO:0006470~protein dephosphorylation, rno04918:Thyroid hormone synthesis, rno05212:Pancreatic cance…
3 GO:0050919~negative chemotaxis, IPR013164:Cadherin, N-terminal, Synaptosome, rno04720:Long-term potentiation, IPR020894:Cadherin conserved site, IPR015919:Cadherin-like, IPR002126:Cadherin, rno05206:MicroRNAs in cancer, rno03015:mRNA surveillance pathway, rno04911:Insulin secretion, GO:0016477~cell migration, GO:0007156~homophilic cell adhesion via plasma membrane adhesion molecules, Calmodulin…
..count..
1 49
2 76
3 27

## Sheet: snoRF_HIP_F
A B ..set..
1 TRUE TRUE AnB
2 FALSE TRUE (B)\\(A)
3 TRUE FALSE (A)\\(B)
..values..
1 GO:0003730~mRNA 3'-UTR binding, Synaptosome, GO:0030426~growth cone, Protein phosphatase, GO:0030529~intracellular ribonucleoprotein complex, GO:0043005~neuron projection, GO:0045202~synapse, GO:0005654~nucleoplasm, GO:0045944~positive regulation of transcription from RNA polymerase II promoter, Ubl conjugation, GO:0043025~neuronal cell body, Synapse, Transcription regulation, Cell junction, Tr…
2
3 GO:0035035~histone acetyltransferase binding, rno00512:Mucin type O-Glycan biosynthesis, IPR017455:Zinc finger, FYVE-related, GO:0048813~dendrite morphogenesis, GO:0001046~core promoter sequence-specific DNA binding, IPR017096:Kelch-like protein, gigaxonin, domain:RRM 1, domain:RRM 2, GO:0016605~PML body, GO:0005801~cis-Golgi network, Kelch repeat, IPR019787:Zinc finger, PHD-finger, IPR001965:Z…
..count..
1 34
2 0
3 111

## Sheet: snoRF_HIP_M
A B ..set..
1 TRUE TRUE AnB
2 FALSE TRUE (B)\\(A)
3 TRUE FALSE (A)\\(B)
..values..
1 GO:0005654~nucleoplasm, Phosphoprotein, GO:0005634~nucleus, GO:0005794~Golgi apparatus, Zinc-finger, Transcription regulation, Transcription, Zinc, Metal-binding, GO:0005737~cytoplasm, GO:0016020~membrane, GO:0043025~neuronal cell body, Alternative splicing, Nucleus, GO:0045944~positive regulation of transcription from RNA polymerase II promoter, GO:0045202~synapse, GO:0003700~transcription fac…
2
3 Repressor, GO:0008270~zinc ion binding, GO:0044822~poly(A) RNA binding, GO:0003682~chromatin binding, GO:0010975~regulation of neuron projection development, GO:0045893~positive regulation of transcription, DNA-templated, GO:0000978~RNA polymerase II core promoter proximal region sequence-specific DNA binding, GO:0003677~DNA binding, Transferase, DNA-binding, GO:0006351~transcription, DNA-templ…
..count..
1 34
2 0
3 431

[truncated: 2 more sheets: snoRF_CER_F, snoRF_CER_M]
